# Supplementary material for: The global fatty liver disease Sustainable Development Goal country score for 195 countries and territories
Source: PubMed Central journal article supplement — Hepatology. 2023 Apr 18;78(3):911–28. doi: 10.1097/HEP.0000000000000361 (PMC10442089; doi:10.1097/hep.0000000000000361), 2023-04-18
Supplement: hep-78-911-s001.pdf [file hep-78-911-s001.pdf]

Supplementary table 1. Fatty Liver Disease-SDG score for 195 countries and territories per decade from 1990-2017

| Super region name                                | Region name               | Country name             | Short name | 1990                | 2000                | 2010                | 2017                |
|--------------------------------------------------|---------------------------|--------------------------|------------|---------------------|---------------------|---------------------|---------------------|
|                                                  |                           |                          |            | 53.7                | 52.5                | 54.1                | 52.3                |
| Central Europe, Eastern Europe, and Central Asia | Central Asia              | Azerbaijan               | AZE        | (51.2–56.1)<br>47.6 | (50.2–54.6)<br>48.0 | (45.6–58.7)<br>53.6 | (42.3–61.2)<br>52.6 |
| Central Europe, Eastern Europe, and Central Asia | Central Asia              | Turkmenistan             | TKM        | (44.5–50.1)<br>35.4 | (44.4–50.7)<br>24.9 | (46.3–57.6)<br>44.2 | (39.8–58.8)<br>54.0 |
| Central Europe, Eastern Europe, and Central Asia | Central Asia              | Mongolia                 | MNG        | (30.6–39.1)<br>59.3 | (23.7–26.7)<br>64.2 | (40.0–47.3)<br>56.0 | (49.6–57.6)<br>55.9 |
| Central Europe, Eastern Europe, and Central Asia | Central Asia              | Georgia                  | GEO        | (54.6–62.8)<br>63.5 | (60.5–67.3)<br>63.4 | (45.1–62.9)<br>65.2 | (46.1–65.5)<br>57.4 |
| Central Europe, Eastern Europe, and Central Asia | Central Europe            | Montenegro               | MNE        | (59.0–66.9)<br>46.2 | (60.0–66.3)<br>47.6 | (58.2–69.2)<br>55.5 | (50.1–68.4)<br>58.0 |
| Central Europe, Eastern Europe, and Central Asia | Central Asia              | Uzbekistan               | UZB        | (35.6–50.8)<br>52.4 | (44.4–50.4)<br>53.7 | (51.9–58.3)<br>56.2 | (50.1–63.0)<br>58.3 |
| Central Europe, Eastern Europe, and Central Asia | Central Asia              | Tajikistan               | TJK        | (49.6–55.0)<br>57.2 | (51.0–56.0)<br>60.7 | (53.9–58.3)<br>61.9 | (55.6–61.2)<br>61.5 |
| Central Europe, Eastern Europe, and Central Asia | Central Asia              | Armenia                  | ARM        | (54.1–59.9)<br>45.2 | (57.3–63.4)<br>43.5 | (50.2–66.6)<br>52.9 | (49.6–70.0)<br>63.7 |
| Central Europe, Eastern Europe, and Central Asia | Central Europe            | Albania                  | ALB        | (37.5–53.6)<br>60.6 | (42.2–44.7)<br>60.4 | (47.7–62.8)<br>65.0 | (49.8–71.9)<br>64.3 |
| Central Europe, Eastern Europe, and Central Asia | Central Europe            | Bulgaria                 | BGR        | (56.0–63.8)<br>55.6 | (54.6–64.1)<br>47.1 | (56.3–69.6)<br>57.7 | (48.1–70.9)<br>65.0 |
| Central Europe, Eastern Europe, and Central Asia | Central Asia              | Kazakhstan               | KAZ        | (53.7–57.4)<br>54.7 | (44.1–49.7)<br>59.1 | (55.4–59.7)<br>61.9 | (59.7–68.6)<br>65.5 |
| Central Europe, Eastern Europe, and Central Asia | Central Europe            | Bosnia and Herzegovina   | BIH        | (52.0–57.2)<br>59.5 | (55.6–62.4)<br>60.7 | (55.0–66.2)<br>67.3 | (50.9–71.3)<br>68.1 |
| Central Europe, Eastern Europe, and Central Asia | Central Europe            | Romania                  | ROU        | (57.1–61.6)<br>62.8 | (56.3–63.7)<br>58.6 | (62.2–70.5)<br>68.7 | (57.4–73.1)<br>68.2 |
| Central Europe, Eastern Europe, and Central Asia | Eastern Europe            | Ukraine                  | UKR        | (60.3–65.0)<br>55.2 | (56.1–60.8)<br>60.1 | (66.5–70.6)<br>65.9 | (65.5–70.8)<br>69.2 |
| Central Europe, Eastern Europe, and Central Asia | Central Europe            | Hungary                  | HUN        | (51.8–57.8)<br>59.8 | (52.5–64.0)<br>62.1 | (57.6–70.1)<br>67.3 | (56.5–74.5)<br>69.3 |
| Central Europe, Eastern Europe, and Central Asia | Central Europe            | North Macedonia          | MKD        | (57.1–62.1)<br>50.3 | (59.0–64.7)<br>51.2 | (64.0–70.0)<br>61.9 | (64.2–73.1)<br>69.6 |
| Central Europe, Eastern Europe, and Central Asia | Central Asia              | Kyrgyzstan               | KGZ        | (47.3–53.1)<br>57.6 | (48.6–53.8)<br>50.4 | (59.8–63.8)<br>61.0 | (67.3–71.7)<br>70.4 |
| Central Europe, Eastern Europe, and Central Asia | Eastern Europe            | Russian Federation       | RUS        | (54.1–60.2)<br>54.7 | (47.0–53.3)<br>56.5 | (57.2–63.9)<br>64.5 | (64.4–73.8)<br>70.9 |
| Central Europe, Eastern Europe, and Central Asia | Central Europe            | Serbia                   | SRB        | (51.5–57.3)<br>58.8 | (53.2–59.2)<br>60.5 | (61.8–67.1)<br>65.3 | (67.6–73.7)<br>73.0 |
| Central Europe, Eastern Europe, and Central Asia | Eastern Europe            | Republic of Moldova      | MDA        | (56.5–61.1)<br>62.5 | (58.1–62.8)<br>69.7 | (63.2–67.2)<br>73.4 | (70.8–74.9)<br>74.0 |
| Central Europe, Eastern Europe, and Central Asia | Central Europe            | Slovakia                 | SVK        | (60.1–64.6)<br>65.9 | (66.2–72.1)<br>69.3 | (66.0–77.6)<br>72.0 | (55.3–80.5)<br>74.2 |
| Central Europe, Eastern Europe, and Central Asia | Central Europe            | Croatia                  | HRV        | (62.8–68.3)<br>69.9 | (64.3–72.6)<br>72.2 | (53.7–78.1)<br>75.8 | (56.1–81.9)<br>74.8 |
| Central Europe, Eastern Europe, and Central Asia | Central Europe            | Slovenia                 | SVN        | (66.4–72.7)<br>62.1 | (62.3–76.9)<br>60.1 | (58.1–84.3)<br>66.5 | (60.3–87.2)<br>75.6 |
| Central Europe, Eastern Europe, and Central Asia | Eastern Europe            | Belarus                  | BLR        | (59.9–64.0)<br>64.8 | (58.0–62.0)<br>69.5 | (64.6–68.3)<br>72.6 | (71.8–78.4)<br>76.3 |
| Central Europe, Eastern Europe, and Central Asia | Eastern Europe            | Latvia                   | LVA        | (62.4–66.8)<br>59.1 | (67.6–71.1)<br>68.1 | (69.7–74.8)<br>74.0 | (71.8–80.0)<br>77.0 |
| Central Europe, Eastern Europe, and Central Asia | Central Europe            | Poland                   | POL        | (56.8–61.2)<br>68.2 | (65.0–70.4)<br>74.4 | (68.8–77.2)<br>75.6 | (71.8–80.6)<br>77.9 |
| Central Europe, Eastern Europe, and Central Asia | Eastern Europe            | Lithuania                | LTU        | (66.3–69.7)<br>62.9 | (73.0–75.8)<br>70.9 | (73.0–77.6)<br>78.0 | (74.2–80.9)<br>78.7 |
| Central Europe, Eastern Europe, and Central Asia | Central Europe            | Czechia                  | CZE        | (59.6–65.2)<br>64.6 | (62.7–75.4)<br>69.5 | (69.5–82.4)<br>77.1 | (64.1–84.8)<br>78.8 |
| Central Europe, Eastern Europe, and Central Asia | Eastern Europe            | Estonia                  | EST        | (62.0–66.7)<br>28.8 | (66.9–71.5)<br>41.0 | (71.7–80.5)<br>61.2 | (68.8–84.2)<br>67.0 |
| High-income                                      | Southern Latin America    | Uruguay                  | URY        | (26.1–52.1)<br>53.7 | (27.9–60.6)<br>65.5 | (29.9–67.6)<br>69.9 | (60.1–71.6)<br>72.3 |
| High-income                                      | High-income Asia Pacific  | Brunei Darussalam        | BRN        | (51.3–55.8)<br>74.3 | (63.3–67.6)<br>76.3 | (66.5–72.6)<br>76.4 | (68.1–75.5)<br>74.5 |
| High-income                                      | Western Europe            | Luxembourg               | LUX        | (70.2–77.1)<br>58.2 | (62.3–82.2)<br>65.7 | (60.8–87.3)<br>72.6 | (61.9–87.9)<br>74.9 |
| High-income                                      | High-income North America | Greenland                | GRL        | (55.2–60.9)<br>80.7 | (63.1–68.0)<br>77.6 | (69.2–75.1)<br>74.8 | (71.4–78.0)<br>75.9 |
| High-income                                      | Western Europe            | Andorra                  | AND        | (74.7–85.2)<br>61.6 | (59.5–87.0)<br>67.9 | (61.5–87.8)<br>74.2 | (62.4–88.7)<br>76.8 |
| High-income                                      | Southern Latin America    | Argentina                | ARG        | (59.3–63.6)<br>81.7 | (65.8–69.6)<br>85.4 | (72.4–75.9)<br>81.8 | (73.8–79.6)<br>79.1 |
| High-income                                      | Western Europe            | Iceland                  | ISL        | (76.7–84.8)<br>62.6 | (75.0–90.2)<br>71.7 | (63.0–90.9)<br>75.8 | (63.0–90.3)<br>79.2 |
| High-income                                      | Southern Latin America    | Chile                    | CHL        | (60.8–64.1)<br>74.5 | (69.9–73.4)<br>77.5 | (72.3–78.2)<br>77.7 | (74.5–82.6)<br>79.8 |
| High-income                                      | Western Europe            | Greece                   | GRC        | (71.5–76.5)<br>73.1 | (71.9–80.8)<br>76.8 | (58.1–83.7)<br>78.7 | (66.5–85.5)<br>79.9 |
| High-income                                      | Western Europe            | Italy                    | ITA        | (69.6–75.5)<br>76.6 | (67.7–81.5)<br>80.5 | (59.3–86.2)<br>83.3 | (60.3–87.6)<br>80.3 |
| High-income                                      | Australasia               | New Zealand              | NZL        | (73.1–79.0)<br>71.9 | (73.8–84.9)<br>77.2 | (74.2–88.8)<br>81.1 | (62.4–89.3)<br>82.0 |
| High-income                                      | Western Europe            | Malta                    | MLT        | (69.2–74.1)<br>70.2 | (72.1–80.6)<br>75.3 | (72.9–85.9)<br>80.1 | (69.9–87.7)<br>82.4 |
| High-income                                      | Western Europe            | Spain                    | ESP        | (68.1–72.0)<br>66.7 | (70.4–78.5)<br>72.1 | (71.7–85.0)<br>78.5 | (73.0–87.4)<br>82.9 |
| High-income                                      | Western Europe            | Portugal                 | PRT        | (65.3–68.0)<br>76.8 | (69.1–74.2)<br>79.0 | (73.2–81.6)<br>81.3 | (77.0–86.7)<br>84.0 |
| High-income                                      | Western Europe            | Denmark                  | DNK        | (73.3–79.0)<br>70.0 | (70.7–83.5)<br>76.5 | (60.3–88.4)<br>83.8 | (67.2–91.0)<br>84.9 |
| High-income                                      | Western Europe            | Ireland                  | IRL        | (67.2–72.3)<br>78.4 | (71.7–79.7)<br>81.9 | (74.9–89.0)<br>85.6 | (72.8–91.1)<br>85.3 |
| High-income                                      | High-income North America | United States of America | USA        | (76.5–80.0)<br>77.9 | (80.1–83.5)<br>81.3 | (83.2–87.5)<br>85.1 | (81.7–88.0)<br>85.8 |
| High-income                                      | Western Europe            | Austria                  | AUT        | (74.6–80.1)<br>64.5 | (74.9–84.9)<br>77.4 | (76.6–89.5)<br>85.2 | (75.2–91.3)<br>86.5 |
| High-income                                      | High-income Asia Pacific  | Republic of Korea        | KOR        | (62.3–66.6)<br>80.9 | (74.8–79.5)<br>85.8 | (78.7–89.2)<br>87.7 | (76.9–91.2)<br>86.7 |
| High-income                                      | Western Europe            | Germany                  | DEU        | (78.3–82.7)<br>75.1 | (81.7–88.6)<br>81.6 | (82.3–91.7)<br>86.3 | (78.8–91.9)<br>87.6 |
| High-income                                      | Western Europe            | United Kingdom           | GBR        | (73.2–76.8)<br>82.1 | (79.8–83.1)<br>85.7 | (83.4–88.5)<br>88.9 | (82.4–90.9)<br>87.7 |
| High-income                                      | Western Europe            | Norway                   | NOR        | (78.8–84.4)<br>74.8 | (80.6–89.2)<br>81.2 | (81.2–93.5)<br>84.3 | (76.6–93.1)<br>87.7 |
| High-income                                      | Western Europe            | Cyprus                   | CYP        | (73.0–76.1)<br>76.8 | (79.3–83.0)<br>80.7 | (78.7–88.0)<br>86.0 | (81.0–91.8)<br>87.9 |
| High-income                                      | Western Europe            | Belgium                  | BEL        | (73.5–79.2)<br>76.6 | (75.2–84.5)<br>80.7 | (78.8–89.7)<br>86.0 | (79.3–92.6)<br>87.9 |

|                              |                              |                                    |     |             |             |             |             |
|------------------------------|------------------------------|------------------------------------|-----|-------------|-------------|-------------|-------------|
|                              |                              |                                    |     | 78.3        | 81.3        | 87.3        | 88.1        |
| High-income                  | Western Europe               | Israel                             | ISR | (75.6-80.5) | (77.5-83.9) | (82.4-90.5) | (82.8-91.6) |
| High-income                  | High-income North America    | Canada                             | CAN | 81.8        | 86.9        | 88.9        | 88.3        |
| High-income                  | Western Europe               | Switzerland                        | CHE | (79.4-83.7) | (83.5-89.3) | (82.8-93.0) | (80.7-93.1) |
| High-income                  | Australasia                  | Australia                          | AUS | 85.4        | 88.0        | 89.0        | 88.4        |
| High-income                  | High-income Asia Pacific     | Singapore                          | SGP | (80.7-88.6) | (81.9-92.0) | (80.2-93.7) | (78.0-93.4) |
| High-income                  | Western Europe               | France                             | FRA | 78.4        | 86.0        | 89.3        | 88.6        |
| High-income                  | Western Europe               | Sweden                             | SWE | (76.9-79.9) | (84.4-87.4) | (86.1-91.6) | (83.6-92.1) |
| High-income                  | Western Europe               | Netherlands                        | NLD | 66.1        | 77.2        | 86.9        | 89.2        |
| High-income                  | Western Europe               | Finland                            | FIN | (64.2-67.8) | (74.8-79.3) | (83.3-89.6) | (84.9-92.0) |
| High-income                  | High-income Asia Pacific     | Japan                              | JPN | 79.6        | 84.0        | 88.0        | 89.4        |
| Latin America and Caribbean  | Caribbean                    | Haiti                              | HTI | (77.2-81.4) | (80.4-86.7) | (82.8-91.4) | (82.9-93.2) |
| Latin America and Caribbean  | Central Latin America        | Honduras                           | HND | 85.6        | 89.1        | 91.8        | 90.5        |
| Latin America and Caribbean  | Caribbean                    | Guyana                             | GUY | (83.2-87.6) | (84.9-91.9) | (85.8-95.1) | (83.7-94.5) |
| Latin America and Caribbean  | Central Latin America        | Guatemala                          | GTM | 79.4        | 83.8        | 90.0        | 90.9        |
| Latin America and Caribbean  | Caribbean                    | Puerto Rico                        | PRI | (76.9-81.3) | (80.8-86.1) | (86.0-92.5) | (86.2-94.2) |
| Latin America and Caribbean  | Caribbean                    | Saint Vincent and the Grenadines   | VCT | 78.0        | 85.6        | 90.5        | 91.3        |
| Latin America and Caribbean  | Caribbean                    | United States Virgin Islands       | VIR | (75.5-79.9) | (82.4-87.8) | (86.9-93.1) | (86.4-94.5) |
| Latin America and Caribbean  | Tropical Latin America       | Brazil                             | BRA | 85.8        | 91.0        | 93.3        | 93.5        |
| Latin America and Caribbean  | Andean Latin America         | Bolivia (Plurinational State of)   | BOL | (84.0-87.3) | (89.5-92.3) | (91.7-94.8) | (91.6-95.3) |
| Latin America and Caribbean  | Central Latin America        | Nicaragua                          | NIC | 12.4        | 24.1        | 34.8        | 40.9        |
| Latin America and Caribbean  | Caribbean                    | Suriname                           | SUR | (8.94-17.4) | (19.3-28.1) | (29.6-39.7) | (35.8-46.0) |
| Latin America and Caribbean  | Central Latin America        | Venezuela (Bolivarian Republic of) | VEN | 20.3        | 24.9        | 41.3        | 48.3        |
| Latin America and Caribbean  | Caribbean                    | Dominican Republic                 | DOM | (19.3-21.0) | (20.6-43.3) | (23.9-54.0) | (25.3-57.7) |
| Latin America and Caribbean  | Caribbean                    | Trinidad and Tobago                | TTO | 39.2        | 44.8        | 53.1        | 56.2        |
| Latin America and Caribbean  | Caribbean                    | Grenada                            | GRD | (36.8-41.4) | (42.5-46.8) | (51.0-55.1) | (52.6-59.5) |
| Latin America and Caribbean  | Tropical Latin America       | Paraguay                           | PRY | 33.7        | 45.1        | 55.4        | 58.6        |
| Latin America and Caribbean  | Caribbean                    | Belize                             | BLZ | (17.8-37.9) | (42.0-47.7) | (52.9-57.8) | (55.7-61.6) |
| Latin America and Caribbean  | Central Latin America        | Mexico                             | MEX | 65.6        | 56.6        | 58.4        | 59.0        |
| Latin America and Caribbean  | Caribbean                    | Jamaica                            | JAM | (56.8-70.4) | (50.9-70.6) | (55.6-72.0) | (57.2-69.1) |
| Latin America and Caribbean  | Caribbean                    | Saint Lucia                        | LCA | 50.6        | 54.8        | 59.8        | 59.9        |
| Latin America and Caribbean  | Caribbean                    | Bahamas                            | BHS | (48.1-52.8) | (52.5-56.9) | (57.3-62.0) | (57.4-62.5) |
| Latin America and Caribbean  | Caribbean                    | Dominica                           | DMA | 63.8        | 59.0        | 57.4        | 60.0        |
| Latin America and Caribbean  | Andean Latin America         | Peru                               | PER | (58.6-67.7) | (47.0-68.2) | (49.0-70.1) | (49.1-72.1) |
| Latin America and Caribbean  | Caribbean                    | Bermuda                            | BMU | 48.4        | 56.1        | 61.8        | 61.7        |
| Latin America and Caribbean  | Caribbean                    | Barbados                           | BRB | (46.6-49.9) | (54.5-57.6) | (57.3-64.8) | (46.8-68.2) |
| Latin America and Caribbean  | Caribbean                    | Antigua and Barbuda                | ATG | 35.6        | 48.5        | 59.1        | 62.0        |
| Latin America and Caribbean  | Caribbean                    | Cuba                               | CUB | (32.7-38.3) | (45.6-51.4) | (54.7-63.2) | (53.5-68.1) |
| Latin America and Caribbean  | Caribbean                    | Saint Vincent and the Grenadines   | VCT | 37.1        | 46.7        | 58.4        | 63.4        |
| Latin America and Caribbean  | Caribbean                    | Trinidad and Tobago                | TTO | (21.9-44.6) | (24.6-51.5) | (54.0-62.0) | (59.4-66.9) |
| Latin America and Caribbean  | Caribbean                    | Grenada                            | GRD | 49.7        | 53.6        | 61.0        | 63.5        |
| Latin America and Caribbean  | Caribbean                    | Barbados                           | BRB | (47.3-51.9) | (51.2-56.0) | (58.9-63.3) | (60.6-66.2) |
| Latin America and Caribbean  | Caribbean                    | Antigua and Barbuda                | ATG | 49.5        | 57.1        | 63.9        | 64.0        |
| Latin America and Caribbean  | Caribbean                    | Cuba                               | CUB | (46.8-51.9) | (54.0-59.5) | (61.0-66.3) | (59.0-67.8) |
| Latin America and Caribbean  | Caribbean                    | Saint Vincent and the Grenadines   | VCT | 54.2        | 61.1        | 65.2        | 64.3        |
| Latin America and Caribbean  | Caribbean                    | Trinidad and Tobago                | TTO | (51.6-56.6) | (59.0-63.1) | (62.5-67.5) | (60.5-67.9) |
| Latin America and Caribbean  | Caribbean                    | Grenada                            | GRD | 49.5        | 55.5        | 64.7        | 65.4        |
| Latin America and Caribbean  | Caribbean                    | Barbados                           | BRB | (47.4-51.4) | (53.9-57.1) | (61.6-67.5) | (60.0-70.5) |
| Latin America and Caribbean  | Caribbean                    | Antigua and Barbuda                | ATG | 47.1        | 59.6        | 64.2        | 65.4        |
| Latin America and Caribbean  | Caribbean                    | Cuba                               | CUB | (44.3-49.5) | (57.2-61.9) | (61.5-66.6) | (62.7-68.0) |
| Latin America and Caribbean  | Caribbean                    | Barbados                           | BRB | 53.4        | 58.0        | 61.9        | 65.7        |
| Latin America and Caribbean  | Caribbean                    | Antigua and Barbuda                | ATG | (50.3-56.1) | (55.7-60.0) | (59.2-64.5) | (61.2-70.0) |
| Latin America and Caribbean  | Caribbean                    | Belize                             | BLZ | 52.1        | 53.1        | 62.7        | 65.8        |
| Latin America and Caribbean  | Caribbean                    | Barbados                           | BRB | (48.8-55.0) | (50.5-55.5) | (60.6-64.9) | (63.3-68.2) |
| Latin America and Caribbean  | Caribbean                    | Antigua and Barbuda                | ATG | 37.1        | 54.3        | 62.7        | 66.0        |
| Latin America and Caribbean  | Caribbean                    | Cuba                               | CUB | (21.9-46.1) | (51.1-56.7) | (60.7-64.6) | (62.5-69.2) |
| Latin America and Caribbean  | Caribbean                    | Barbados                           | BRB | 48.6        | 56.7        | 65.5        | 68.5        |
| Latin America and Caribbean  | Caribbean                    | Antigua and Barbuda                | ATG | (45.6-51.2) | (52.2-59.8) | (62.4-67.9) | (64.7-71.4) |
| Latin America and Caribbean  | Caribbean                    | Cuba                               | CUB | 62.0        | 65.1        | 71.5        | 70.3        |
| Latin America and Caribbean  | Caribbean                    | Barbados                           | BRB | (59.4-64.3) | (62.2-67.6) | (68.6-74.0) | (66.5-74.0) |
| Latin America and Caribbean  | Caribbean                    | Saint Lucia                        | LCA | 50.6        | 60.1        | 68.5        | 70.4        |
| Latin America and Caribbean  | Caribbean                    | Bahamas                            | BHS | (48.3-52.7) | (57.7-62.2) | (66.5-70.6) | (67.9-72.6) |
| Latin America and Caribbean  | Caribbean                    | Dominica                           | DMA | 59.5        | 64.2        | 69.7        | 71.0        |
| Latin America and Caribbean  | Caribbean                    | Barbados                           | BRB | (56.0-62.4) | (58.4-67.8) | (64.6-73.0) | (64.8-74.9) |
| Latin America and Caribbean  | Caribbean                    | Antigua and Barbuda                | ATG | 62.9        | 67.6        | 71.4        | 71.2        |
| Latin America and Caribbean  | Caribbean                    | Cuba                               | CUB | (60.1-65.4) | (64.4-70.6) | (68.1-74.5) | (67.5-74.5) |
| Latin America and Caribbean  | Caribbean                    | Barbados                           | BRB | 54.9        | 61.3        | 70.4        | 71.3        |
| Latin America and Caribbean  | Caribbean                    | Antigua and Barbuda                | ATG | (52.2-57.4) | (58.4-64.0) | (66.5-73.5) | (60.2-76.8) |
| Latin America and Caribbean  | Caribbean                    | Bermuda                            | BMU | 55.7        | 60.3        | 69.7        | 71.5        |
| Latin America and Caribbean  | Caribbean                    | Barbados                           | BRB | (43.3-62.9) | (50.3-71.5) | (55.6-79.7) | (57.6-82.5) |
| Latin America and Caribbean  | Caribbean                    | Antigua and Barbuda                | ATG | 51.6        | 61.6        | 68.0        | 71.5        |
| Latin America and Caribbean  | Caribbean                    | Cuba                               | CUB | (47.9-54.7) | (59.6-63.3) | (65.9-69.9) | (68.3-74.4) |
| Latin America and Caribbean  | Caribbean                    | Barbados                           | BRB | 61.4        | 66.3        | 72.6        | 73.0        |
| Latin America and Caribbean  | Caribbean                    | Antigua and Barbuda                | ATG | (57.5-64.4) | (61.0-69.7) | (68.3-75.6) | (67.4-77.0) |
| Latin America and Caribbean  | Caribbean                    | Cuba                               | CUB | 63.1        | 68.0        | 74.9        | 76.3        |
| Latin America and Caribbean  | Caribbean                    | Barbados                           | BRB | (60.6-65.4) | (65.5-70.4) | (72.3-77.3) | (73.2-78.8) |
| Latin America and Caribbean  | Caribbean                    | Antigua and Barbuda                | ATG | 66.9        | 72.9        | 76.6        | 76.8        |
| Latin America and Caribbean  | Caribbean                    | Cuba                               | CUB | (64.4-68.8) | (70.4-74.7) | (74.3-78.4) | (73.4-79.9) |
| Latin America and Caribbean  | Caribbean                    | Barbados                           | BRB | 53.0        | 62.5        | 72.5        | 77.0        |
| Latin America and Caribbean  | Caribbean                    | Antigua and Barbuda                | ATG | (50.3-55.3) | (60.0-64.9) | (70.1-74.9) | (74.5-79.6) |
| Latin America and Caribbean  | Caribbean                    | Cuba                               | CUB | 63.6        | 71.9        | 76.4        | 78.7        |
| Latin America and Caribbean  | Caribbean                    | Barbados                           | BRB | (60.8-66.2) | (69.6-73.9) | (73.6-78.7) | (74.9-81.7) |
| Latin America and Caribbean  | Caribbean                    | Antigua and Barbuda                | ATG | 63.8        | 69.9        | 77.5        | 79.4        |
| Latin America and Caribbean  | Caribbean                    | Cuba                               | CUB | (60.0-66.8) | (65.0-73.2) | (74.8-79.8) | (76.2-82.1) |
| Latin America and Caribbean  | Caribbean                    | Barbados                           | BRB | 5.20        | 3.95        | 11.6        | 18.2        |
| North Africa and Middle East | North Africa and Middle East | Afghanistan                        | AFG | (2.35-14.1) | (2.38-5.41) | (6.51-15.4) | (13.7-24.5) |
| North Africa and Middle East | North Africa and Middle East | Yemen                              | YEM | 8.93        | 24.1        | 36.9        | 39.2        |
| North Africa and Middle East | North Africa and Middle East | Sudan                              | SDN | (4.72-13.4) | (14.4-29.6) | (30.6-41.8) | (32.8-44.2) |
| North Africa and Middle East | North Africa and Middle East | Egypt                              | EGY | 15.3        | 21.0        | 32.0        | 46.6        |
| North Africa and Middle East | North Africa and Middle East | Morocco                            | MAR | (12.0-17.9) | (17.8-23.7) | (26.5-38.3) | (42.1-51.1) |
| North Africa and Middle East | North Africa and Middle East | Saudi Arabia                       | SAU | 36.8        | 45.0        | 47.6        | 48.6        |
| North Africa and Middle East | North Africa and Middle East | United Arab Emirates               | ARE | (34.3-38.9) | (42.4-47.1) | (43.0-50.7) | (37.3-54.9) |
| North Africa and Middle East | North Africa and Middle East | Syrian Arab Republic               | SYR | 25.9        | 34.2        | 44.3        | 50.4        |
| North Africa and Middle East | North Africa and Middle East | Qatar                              | QAT | (23.5-27.9) | (31.8-36.4) | (41.0-47.3) | (45.7-54.3) |
| North Africa and Middle East | North Africa and Middle East | Kuwait                             | KWT | 49.4        | 58.6        | 55.0        | 52.2        |
| North Africa and Middle East | North Africa and Middle East | Oman                               | OMN | (44.8-53.0) | (51.5-62.8) | (44.5-64.9) | (49.1-65.5) |
| North Africa and Middle East | North Africa and Middle East | Libya                              | LBY | 47.5        | 51.6        | 53.4        | 54.0        |
| North Africa and Middle East | North Africa and Middle East | Afghanistan                        | AFG | (43.5-51.4) | (47.1-55.3) | (40.3-60.1) | (41.0-63.0) |
| North Africa and Middle East | North Africa and Middle East | Yemen                              | YEM | 34.8        | 47.1        | 54.5        | 56.1        |
| North Africa and Middle East | North Africa and Middle East | Sudan                              | SDN | (32.1-37.6) | (44.1-49.8) | (50.0-58.3) | (48.4-61.3) |
| North Africa and Middle East | North Africa and Middle East | Egypt                              | EGY | 42.3        | 48.7        | 54.5        | 56.8        |
| North Africa and Middle East | North Africa and Middle East | Morocco                            | MAR | (36.1-52.6) | (43.1-61.2) | (51.0-68.7) | (54.3-69.6) |
| North Africa and Middle East | North Africa and Middle East | Saudi Arabia                       | SAU | 51.9        | 57.9        | 55.5        | 57.4        |
| North Africa and Middle East | North Africa and Middle East | United Arab Emirates               | ARE | (44.0-62.7) | (48.0-68.7) | (53.2-68.6) | (56.5-59.7) |
| North Africa and Middle East | North Africa and Middle East | Syrian Arab Republic               | SYR | 40.8        | 52.0        | 58.2        | 58.6        |
| North Africa and Middle East | North Africa and Middle East | Qatar                              | QAT | (37.3-44.2) | (48.1-55.5) | (46.0-63.5) | (46.7-68.9) |
| North Africa and Middle East | North Africa and Middle East | Kuwait                             | KWT | 44.9        | 53.5        | 57.4        | 59.9        |
| North Africa and Middle East | North Africa and Middle East | Oman                               | OMN | (34.0-50.4) | (46.1-57.5) | (43.1-63.0) | (49.3-65.3) |

|                                        |                              |                                  |     |             |             |             |             |
|----------------------------------------|------------------------------|----------------------------------|-----|-------------|-------------|-------------|-------------|
|                                        |                              |                                  |     | 32.3        | 37.0        | 53.0        | 61.7        |
| North Africa and Middle East           | North Africa and Middle East | Iraq                             | IRQ | (28.5-35.9) | (33.0-40.6) | (50.8-55.4) | (58.2-64.5) |
|                                        |                              |                                  |     | 40.7        | 47.8        | 58.2        | 62.5        |
| North Africa and Middle East           | North Africa and Middle East | Algeria                          | DZA | (38.3-42.9) | (45.2-50.2) | (53.8-61.3) | (52.4-67.4) |
|                                        |                              |                                  |     | 41.9        | 51.9        | 60.6        | 62.6        |
| North Africa and Middle East           | North Africa and Middle East | Turkey                           | TUR | (39.4-44.3) | (49.7-54.1) | (56.2-63.5) | (47.2-68.3) |
|                                        |                              |                                  |     | 40.4        | 55.2        | 63.2        | 67.7        |
| North Africa and Middle East           | North Africa and Middle East | Iran (Islamic Republic of)       | IRN | (38.1-42.6) | (53.2-56.9) | (59.4-65.8) | (62.3-71.1) |
|                                        |                              |                                  |     | 46.6        | 52.6        | 61.2        | 68.5        |
| North Africa and Middle East           | North Africa and Middle East | Palestine                        | PSE | (42.7-50.5) | (50.1-55.0) | (58.9-63.4) | (65.6-71.3) |
|                                        |                              |                                  |     | 48.0        | 56.4        | 65.1        | 68.6        |
| North Africa and Middle East           | North Africa and Middle East | Tunisia                          | TUN | (45.9-50.2) | (53.3-59.1) | (60.1-69.3) | (61.2-74.0) |
|                                        |                              |                                  |     | 51.5        | 62.3        | 69.9        | 71.9        |
| North Africa and Middle East           | North Africa and Middle East | Lebanon                          | LBN | (47.7-55.3) | (58.4-66.0) | (67.1-72.4) | (67.9-75.4) |
|                                        |                              |                                  |     | 42.1        | 54.9        | 72.2        | 75.9        |
| North Africa and Middle East           | North Africa and Middle East | Bahrain                          | BHR | (32.7-46.0) | (51.5-57.4) | (69.4-74.4) | (71.0-79.1) |
|                                        |                              |                                  |     | 55.7        | 64.6        | 77.4        | 81.8        |
| North Africa and Middle East           | North Africa and Middle East | Jordan                           | JOR | (53.0-58.4) | (62.6-66.6) | (75.7-79.0) | (79.0-84.4) |
|                                        |                              |                                  |     | 23.6        | 27.0        | 33.8        | 40.6        |
|                                        | South Asia                   | Pakistan                         | PAK | (20.9-25.9) | (24.4-29.5) | (30.7-36.8) | (36.1-44.6) |
|                                        |                              |                                  |     | 16.6        | 23.8        | 38.6        | 44.4        |
|                                        | South Asia                   | India                            | IND | (9.54-19.4) | (22.4-25.7) | (37.0-40.2) | (42.4-46.2) |
|                                        |                              |                                  |     | 17.8        | 30.6        | 39.8        | 47.5        |
|                                        | South Asia                   | Bangladesh                       | BGD | (9.49-21.2) | (26.3-33.3) | (37.0-42.1) | (44.7-50.2) |
|                                        |                              |                                  |     | 10.8        | 29.5        | 42.5        | 49.4        |
|                                        | South Asia                   | Nepal                            | NPL | (5.82-13.9) | (26.1-32.1) | (39.4-45.8) | (46.1-52.9) |
|                                        |                              |                                  |     | 17.5        | 23.0        | 43.6        | 53.4        |
|                                        | South Asia                   | Bhutan                           | BTN | (15.4-19.5) | (21.3-24.5) | (40.7-46.4) | (50.0-56.8) |
|                                        |                              |                                  |     | 9.14        | 11.8        | 15.4        | 17.7        |
| Southeast Asia, East Asia, and Oceania | Oceania                      | Papua New Guinea                 | PNG | (6.77-10.8) | (9.77-13.2) | (13.9-16.6) | (16.2-18.9) |
|                                        |                              |                                  |     | 14.8        | 16.7        | 20.0        | 22.3        |
| Southeast Asia, East Asia, and Oceania | Oceania                      | Kiribati                         | KIR | (8.07-17.0) | (9.26-18.6) | (18.0-21.7) | (19.6-31.4) |
|                                        |                              |                                  |     | 20.8        | 22.0        | 24.5        | 27.4        |
| Southeast Asia, East Asia, and Oceania | Oceania                      | Marshall Islands                 | MHL | (19.0-22.1) | (20.6-23.3) | (23.3-25.7) | (24.5-38.0) |
|                                        |                              |                                  |     | 18.4        | 22.1        | 25.5        | 29.1        |
| Southeast Asia, East Asia, and Oceania | Oceania                      | Vanuatu                          | VUT | (15.6-27.6) | (17.8-33.1) | (19.0-37.4) | (20.2-40.2) |
|                                        |                              |                                  |     | 14.5        | 22.3        | 28.0        | 33.8        |
| Southeast Asia, East Asia, and Oceania | Oceania                      | Solomon Islands                  | SLB | (7.72-21.9) | (12.7-28.8) | (17.0-33.7) | (27.0-39.2) |
|                                        |                              |                                  |     | 37.3        | 25.5        | 37.4        | 41.9        |
| Southeast Asia, East Asia, and Oceania | Oceania                      | Fiji                             | FJI | (29.8-42.1) | (23.8-30.4) | (32.6-41.4) | (27.5-49.6) |
|                                        |                              |                                  |     | 7.15        | 16.0        | 30.2        | 43.2        |
| Southeast Asia, East Asia, and Oceania | Southeast Asia               | Timor-Leste                      | TLS | (3.73-10.4) | (9.05-20.6) | (25.5-36.0) | (38.3-47.9) |
|                                        |                              |                                  |     | 26.7        | 34.5        | 41.1        | 43.3        |
| Southeast Asia, East Asia, and Oceania | Oceania                      | Micronesia (Federated States of) | FSM | (19.6-35.3) | (25.3-40.4) | (32.7-47.2) | (32.9-52.6) |
|                                        |                              |                                  |     | 6.79        | 20.4        | 36.8        | 45.2        |
| Southeast Asia, East Asia, and Oceania | Southeast Asia               | Lao People's Democratic Republic | LAO | (3.23-10.5) | (14.7-24.6) | (32.4-40.7) | (41.1-49.2) |
|                                        |                              |                                  |     | 64.7        | 52.7        | 47.2        | 46.6        |
| Southeast Asia, East Asia, and Oceania | Oceania                      | Guam                             | GUM | (58.8-68.6) | (45.8-64.6) | (45.3-56.1) | (44.8-48.2) |
|                                        |                              |                                  |     | 15.2        | 26.5        | 40.8        | 49.4        |
| Southeast Asia, East Asia, and Oceania | Southeast Asia               | Myanmar                          | MMR | (9.21-22.2) | (15.0-30.9) | (37.1-43.8) | (46.0-52.6) |
|                                        |                              |                                  |     | 31.4        | 41.0        | 47.2        | 52.7        |
| Southeast Asia, East Asia, and Oceania | Southeast Asia               | Indonesia                        | IDN | (28.0-34.1) | (38.8-43.1) | (45.0-49.3) | (50.2-55.0) |
|                                        |                              |                                  |     | 46.4        | 43.7        | 50.9        | 52.9        |
| Southeast Asia, East Asia, and Oceania | Oceania                      | Tonga                            | TON | (43.1-49.6) | (32.8-49.3) | (46.8-55.0) | (47.9-57.5) |
|                                        |                              |                                  |     | 19.3        | 29.2        | 46.2        | 53.0        |
| Southeast Asia, East Asia, and Oceania | Southeast Asia               | Cambodia                         | KHM | (15.8-22.3) | (27.0-31.3) | (44.0-48.3) | (50.4-55.4) |
|                                        |                              |                                  |     | 52.7        | 54.5        | 52.5        | 53.7        |
| Southeast Asia, East Asia, and Oceania | Southeast Asia               | Philippines                      | PHL | (49.7-55.1) | (52.9-56.2) | (49.9-54.9) | (48.8-57.9) |
|                                        |                              |                                  |     | 47.9        | 51.5        | 53.6        | 54.8        |
| Southeast Asia, East Asia, and Oceania | Oceania                      | Samoa                            | WSM | (43.6-51.9) | (47.7-55.0) | (49.8-57.3) | (50.4-58.7) |
|                                        |                              | Democratic People's Republic of  |     | 43.8        | 46.4        | 52.7        | 56.9        |
| Southeast Asia, East Asia, and Oceania | East Asia                    | Korea                            | PRK | (39.3-48.7) | (42.2-50.5) | (48.9-56.5) | (52.8-61.0) |
|                                        |                              |                                  |     | 57.1        | 57.4        | 57.3        | 57.7        |
| Southeast Asia, East Asia, and Oceania | Oceania                      | American Samoa                   | ASM | (54.1-59.8) | (53.3-60.7) | (51.2-61.4) | (48.5-63.0) |
|                                        |                              |                                  |     | 41.2        | 49.1        | 56.8        | 60.5        |
| Southeast Asia, East Asia, and Oceania | Southeast Asia               | Mauritius                        | MUS | (38.6-43.4) | (46.4-51.6) | (53.4-59.8) | (56.3-63.9) |
|                                        |                              |                                  |     | 45.2        | 53.5        | 60.1        | 61.7        |
| Southeast Asia, East Asia, and Oceania | Southeast Asia               | Malaysia                         | MYS | (42.9-47.2) | (51.1-55.6) | (55.8-63.6) | (53.2-66.6) |
|                                        |                              |                                  |     | 39.0        | 48.5        | 59.3        | 64.1        |
| Southeast Asia, East Asia, and Oceania | Southeast Asia               | Viet Nam                         | VNM | (32.2-43.1) | (44.6-51.6) | (56.1-62.2) | (60.4-67.5) |
|                                        |                              |                                  |     | 63.1        | 61.7        | 63.0        | 66.5        |
| Southeast Asia, East Asia, and Oceania | Oceania                      | Northern Mariana Islands         | MNP | (54.1-68.2) | (48.0-70.3) | (49.4-72.3) | (50.4-74.2) |
|                                        |                              |                                  |     | 38.3        | 49.1        | 61.1        | 67.3        |
| Southeast Asia, East Asia, and Oceania | Southeast Asia               | Sri Lanka                        | LKA | (32.5-42.8) | (46.1-51.7) | (57.9-64.0) | (63.3-71.5) |
|                                        |                              |                                  |     | 53.0        | 58.4        | 66.0        | 68.8        |
| Southeast Asia, East Asia, and Oceania | Southeast Asia               | Seychelles                       | SYC | (50.2-55.5) | (55.9-60.6) | (63.5-68.3) | (66.2-71.3) |
|                                        |                              |                                  |     | 18.4        | 38.1        | 60.3        | 68.9        |
| Southeast Asia, East Asia, and Oceania | Southeast Asia               | Maldives                         | MDV | (13.4-20.6) | (35.1-40.7) | (57.7-62.7) | (66.2-71.4) |
|                                        |                              |                                  |     | 49.9        | 58.6        | 67.9        | 70.9        |
| Southeast Asia, East Asia, and Oceania | Southeast Asia               | Thailand                         | THA | (46.7-52.2) | (55.8-61.1) | (65.1-70.2) | (67.5-73.8) |
|                                        |                              |                                  |     | 62.1        | 69.9        | 72.3        | 71.5        |
| Southeast Asia, East Asia, and Oceania | East Asia                    | Taiwan (Province of China)       | TWN | (59.0-65.1) | (64.9-73.5) | (54.8-79.8) | (56.5-82.0) |
|                                        |                              |                                  |     | 48.2        | 60.9        | 73.9        | 76.8        |
| Southeast Asia, East Asia, and Oceania | East Asia                    | China                            | CHN | (45.9-50.3) | (59.2-62.6) | (72.5-75.1) | (75.4-78.0) |
|                                        |                              |                                  |     | 4.51        | 6.29        | 11.2        | 14.6        |
| Sub-Saharan Africa                     | Western Sub-Saharan Africa   | Niger                            | NER | (3.43-7.00) | (4.08-10.3) | (7.91-16.0) | (8.92-19.4) |
|                                        |                              |                                  |     | 4.35        | 6.89        | 12.3        | 16.1        |
| Sub-Saharan Africa                     | Eastern Sub-Saharan Africa   | Somalia                          | SOM | (2.08-7.29) | (3.80-9.89) | (6.77-15.2) | (11.3-24.1) |
|                                        |                              |                                  |     | 4.52        | 4.69        | 9.23        | 17.1        |
| Sub-Saharan Africa                     | Eastern Sub-Saharan Africa   | South Sudan                      | SSD | (2.69-7.54) | (2.78-6.03) | (5.42-13.7) | (10.4-23.1) |
|                                        |                              |                                  |     | 8.96        | 13.0        | 16.2        | 18.4        |
| Sub-Saharan Africa                     | Western Sub-Saharan Africa   | Benin                            | BEN | (8.41-9.49) | (12.2-13.8) | (15.1-17.2) | (16.9-19.7) |
|                                        |                              |                                  |     | 7.63        | 8.28        | 17.4        | 20.3        |
| Sub-Saharan Africa                     | Central Sub-Saharan Africa   | Central African Republic         | CAF | (4.44-12.6) | (4.81-12.1) | (9.74-24.3) | (11.7-27.3) |
|                                        |                              |                                  |     | 4.40        | 5.66        | 15.0        | 23.9        |
| Sub-Saharan Africa                     | Western Sub-Saharan Africa   | Chad                             | TCD | (3.85-6.86) | (4.48-8.47) | (9.38-20.0) | (13.2-28.4) |
|                                        |                              |                                  |     | 14.0        | 14.2        | 20.5        | 25.7        |
| Sub-Saharan Africa                     | Eastern Sub-Saharan Africa   | Uganda                           | UGA | (11.8-15.9) | (12.1-15.9) | (18.7-31.9) | (20.8-42.8) |
|                                        |                              |                                  |     | 5.35        | 10.8        | 18.4        | 26.0        |
| Sub-Saharan Africa                     | Western Sub-Saharan Africa   | Mali                             | MLI | (3.42-8.97) | (7.24-14.7) | (10.7-22.7) | (14.5-29.6) |
|                                        |                              |                                  |     | 7.34        | 11.7        | 23.9        | 28.1        |
| Sub-Saharan Africa                     | Western Sub-Saharan Africa   | Guinea                           | GIN | (4.51-8.93) | (6.23-15.4) | (20.6-26.9) | (24.6-31.5) |
|                                        |                              |                                  |     | 12.4        | 13.1        | 17.4        | 28.8        |
| Sub-Saharan Africa                     | Western Sub-Saharan Africa   | Burkina Faso                     | BFA | (7.68-16.2) | (7.41-15.3) | (14.7-19.2) | (25.7-31.6) |
|                                        |                              |                                  |     | 5.22        | 11.6        | 22.3        | 30.4        |
| Sub-Saharan Africa                     | Eastern Sub-Saharan Africa   | Mozambique                       | MOZ | (4.74-5.71) | (10.3-16.1) | (13.9-27.7) | (23.7-34.7) |
|                                        |                              |                                  |     | 4.22        | 4.68        | 16.8        | 31.4        |
| Sub-Saharan Africa                     | Eastern Sub-Saharan Africa   | Ethiopia                         | ETH | (3.89-4.54) | (4.53-4.82) | (12.0-23.1) | (20.6-35.6) |

|                    |                             |                                  |     |                     |                     |                     |                     |
|--------------------|-----------------------------|----------------------------------|-----|---------------------|---------------------|---------------------|---------------------|
|                    |                             |                                  |     | 7-83                | 14-7                | 25-1                | 32-3                |
| Sub-Saharan Africa | Western Sub-Saharan Africa  | Guinea-Bissau                    | GNB | (4-12-12-0)<br>15-7 | (8-14-18-4)<br>23-7 | (21-1-28-6)<br>29-7 | (28-3-36-0)<br>33-1 |
| Sub-Saharan Africa | Western Sub-Saharan Africa  | Mauritania                       | MRT | (9-54-18-5)<br>9-62 | (21-3-25-9)<br>13-5 | (27-5-31-8)<br>24-3 | (30-9-35-4)<br>33-7 |
| Sub-Saharan Africa | Eastern Sub-Saharan Africa  | Djibouti                         | DJI | (5-10-13-4)<br>3-17 | (7-89-17-4)<br>11-4 | (19-0-30-1)<br>26-3 | (27-4-39-4)<br>34-7 |
| Sub-Saharan Africa | Eastern Sub-Saharan Africa  | Eritrea                          | ERI | (1-76-5-52)<br>6-81 | (8-19-16-4)<br>14-8 | (21-3-31-1)<br>29-8 | (30-0-39-4)<br>34-8 |
| Sub-Saharan Africa | Eastern Sub-Saharan Africa  | Burundi                          | BDI | (3-61-10-3)<br>20-9 | (9-91-18-2)<br>25-3 | (26-2-33-1)<br>32-0 | (31-1-38-4)<br>35-9 |
| Sub-Saharan Africa | Eastern Sub-Saharan Africa  | Madagascar                       | MDG | (16-2-24-6)<br>13-7 | (21-4-29-0)<br>25-5 | (27-4-36-0)<br>26-4 | (30-8-40-6)<br>36-4 |
| Sub-Saharan Africa | Southern Sub-Saharan Africa | Lesotho                          | LSO | (10-7-20-6)<br>19-3 | (15-2-32-6)<br>17-1 | (14-5-34-4)<br>25-9 | (28-6-43-1)<br>37-2 |
| Sub-Saharan Africa | Central Sub-Saharan Africa  | Democratic Republic of the Congo | COD | (10-9-26-7)<br>17-1 | (11-5-25-0)<br>22-4 | (17-5-34-0)<br>31-6 | (30-8-42-3)<br>37-9 |
| Sub-Saharan Africa | Western Sub-Saharan Africa  | Sierra Leone                     | SLE | (14-3-20-1)<br>6-87 | (19-5-25-1)<br>22-7 | (28-9-34-1)<br>34-1 | (34-7-40-9)<br>38-4 |
| Sub-Saharan Africa | Central Sub-Saharan Africa  | Equatorial Guinea                | GNQ | (4-42-9-67)<br>19-0 | (12-4-30-8)<br>29-0 | (27-9-43-3)<br>35-0 | (32-7-46-0)<br>38-8 |
| Sub-Saharan Africa | Western Sub-Saharan Africa  | Gambia                           | GMB | (15-1-22-2)<br>7-59 | (25-7-32-0)<br>15-8 | (31-8-38-0)<br>31-7 | (35-4-42-0)<br>40-4 |
| Sub-Saharan Africa | Central Sub-Saharan Africa  | Angola                           | AGO | (5-82-11-8)<br>27-1 | (8-11-22-6)<br>30-8 | (25-4-36-6)<br>37-6 | (35-8-44-9)<br>40-5 |
| Sub-Saharan Africa | Eastern Sub-Saharan Africa  | Zambia                           | ZMB | (14-7-32-1)<br>17-8 | (27-9-33-5)<br>26-3 | (30-9-43-0)<br>35-6 | (34-3-49-6)<br>40-7 |
| Sub-Saharan Africa | Western Sub-Saharan Africa  | Senegal                          | SEN | (16-2-19-3)<br>27-7 | (24-7-28-0)<br>28-8 | (33-4-37-6)<br>29-4 | (37-8-43-4)<br>42-7 |
| Sub-Saharan Africa | Southern Sub-Saharan Africa | Eswatini                         | SWZ | (16-5-34-6)<br>23-5 | (22-5-34-2)<br>30-1 | (18-5-38-8)<br>37-9 | (36-0-48-5)<br>43-7 |
| Sub-Saharan Africa | Western Sub-Saharan Africa  | Côte d'Ivoire                    | CIV | (20-2-26-4)<br>18-7 | (27-1-32-9)<br>28-0 | (34-4-41-0)<br>38-2 | (40-3-47-2)<br>44-3 |
| Sub-Saharan Africa | Western Sub-Saharan Africa  | Liberia                          | LBR | (11-1-23-7)<br>13-8 | (15-8-32-5)<br>22-2 | (31-0-42-5)<br>37-7 | (39-9-48-3)<br>44-9 |
| Sub-Saharan Africa | Eastern Sub-Saharan Africa  | Comoros                          | COM | (7-58-17-7)<br>26-4 | (17-2-25-9)<br>31-5 | (33-9-41-2)<br>40-3 | (40-4-48-9)<br>44-9 |
| Sub-Saharan Africa | Western Sub-Saharan Africa  | Togo                             | TGO | (21-3-29-6)<br>24-4 | (28-2-34-5)<br>27-9 | (36-8-43-4)<br>40-1 | (41-4-48-4)<br>46-1 |
| Sub-Saharan Africa | Eastern Sub-Saharan Africa  | Malawi                           | MWI | (13-9-33-3)<br>41-2 | (15-7-32-0)<br>36-9 | (36-0-43-7)<br>36-5 | (42-2-50-0)<br>46-7 |
| Sub-Saharan Africa | Southern Sub-Saharan Africa | Zimbabwe                         | ZWE | (22-4-46-1)<br>13-0 | (32-7-40-7)<br>16-0 | (31-1-41-1)<br>40-7 | (41-5-51-2)<br>46-8 |
| Sub-Saharan Africa | Eastern Sub-Saharan Africa  | Rwanda                           | RWA | (10-4-17-0)<br>24-8 | (13-2-20-5)<br>25-9 | (38-2-43-0)<br>42-1 | (43-5-50-0)<br>47-8 |
| Sub-Saharan Africa | Central Sub-Saharan Africa  | Congo                            | COG | (19-6-29-3)<br>30-9 | (20-8-30-4)<br>35-6 | (38-0-46-0)<br>47-4 | (43-3-52-2)<br>49-0 |
| Sub-Saharan Africa | Western Sub-Saharan Africa  | Nigeria                          | NGA | (25-5-35-7)<br>33-0 | (29-9-40-9)<br>36-3 | (41-8-51-6)<br>45-2 | (43-5-53-7)<br>51-9 |
| Sub-Saharan Africa | Western Sub-Saharan Africa  | Sao Tome and Principe            | STP | (18-2-37-0)<br>33-3 | (30-7-39-8)<br>36-1 | (42-2-48-1)<br>45-5 | (48-6-55-0)<br>52-6 |
| Sub-Saharan Africa | Western Sub-Saharan Africa  | Cameroon                         | CMR | (30-5-36-1)<br>31-9 | (33-1-39-3)<br>38-5 | (41-7-49-3)<br>49-0 | (48-1-57-1)<br>52-8 |
| Sub-Saharan Africa | Eastern Sub-Saharan Africa  | United Republic of Tanzania      | TZA | (28-3-37-1)<br>34-2 | (36-0-40-9)<br>39-1 | (46-5-51-5)<br>49-2 | (49-8-55-7)<br>55-2 |
| Sub-Saharan Africa | Central Sub-Saharan Africa  | Gabon                            | GAB | (29-3-38-3)<br>39-5 | (35-0-42-9)<br>43-0 | (45-1-53-0)<br>50-8 | (51-2-59-0)<br>56-2 |
| Sub-Saharan Africa | Eastern Sub-Saharan Africa  | Kenya                            | KEN | (36-5-42-2)<br>45-5 | (40-5-45-5)<br>42-6 | (48-3-53-3)<br>52-4 | (53-6-58-8)<br>56-6 |
| Sub-Saharan Africa | Southern Sub-Saharan Africa | South Africa                     | ZAF | (42-0-48-6)<br>41-2 | (40-1-44-9)<br>44-5 | (48-3-55-1)<br>52-0 | (45-2-61-2)<br>57-1 |
| Sub-Saharan Africa | Western Sub-Saharan Africa  | Ghana                            | GHA | (37-9-44-1)<br>32-4 | (41-7-47-5)<br>36-5 | (49-2-54-8)<br>50-1 | (53-8-60-3)<br>57-9 |
| Sub-Saharan Africa | Southern Sub-Saharan Africa | Namibia                          | NAM | (17-5-37-3)<br>28-2 | (32-5-40-2)<br>40-3 | (46-3-53-8)<br>52-0 | (53-9-61-6)<br>58-4 |
| Sub-Saharan Africa | Western Sub-Saharan Africa  | Cabo Verde                       | CPV | (23-4-31-2)<br>36-2 | (37-4-43-1)<br>48-0 | (49-2-54-6)<br>54-2 | (55-5-61-3)<br>59-9 |
| Sub-Saharan Africa | Southern Sub-Saharan Africa | Botswana                         | BWA | (31-7-39-8)         | (44-0-52-0)         | (50-9-57-5)         | (55-9-63-6)         |

Supplementary table 2. Fatty Liver Disease-SDG score for 195 countries and territories per year from 1990-2017

| Country name | Country code | Year | Mean value | Lower value | Upper value |
|--------------|--------------|------|------------|-------------|-------------|
| Afghanistan  | AFG          | 1990 | 5.20       | 2.35        | 14.09       |
| Afghanistan  | AFG          | 1991 | 5.04       | 2.35        | 13.24       |
| Afghanistan  | AFG          | 1992 | 4.95       | 2.36        | 12.64       |
| Afghanistan  | AFG          | 1993 | 4.80       | 2.36        | 11.75       |
| Afghanistan  | AFG          | 1994 | 4.51       | 2.36        | 9.58        |
| Afghanistan  | AFG          | 1995 | 4.42       | 2.36        | 8.81        |
| Afghanistan  | AFG          | 1996 | 4.37       | 2.36        | 7.46        |
| Afghanistan  | AFG          | 1997 | 4.21       | 2.37        | 6.05        |
| Afghanistan  | AFG          | 1998 | 4.06       | 2.37        | 5.56        |
| Afghanistan  | AFG          | 1999 | 4.01       | 2.37        | 5.55        |
| Afghanistan  | AFG          | 2000 | 3.95       | 2.38        | 5.41        |
| Afghanistan  | AFG          | 2001 | 4.04       | 2.38        | 5.80        |
| Afghanistan  | AFG          | 2002 | 4.90       | 2.50        | 7.12        |
| Afghanistan  | AFG          | 2003 | 5.64       | 3.01        | 7.87        |
| Afghanistan  | AFG          | 2004 | 6.62       | 3.62        | 8.57        |
| Afghanistan  | AFG          | 2005 | 7.54       | 4.24        | 9.36        |
| Afghanistan  | AFG          | 2006 | 8.10       | 4.55        | 9.84        |
| Afghanistan  | AFG          | 2007 | 8.83       | 4.93        | 10.56       |
| Afghanistan  | AFG          | 2008 | 9.60       | 5.30        | 11.32       |
| Afghanistan  | AFG          | 2009 | 10.73      | 5.99        | 13.25       |
| Afghanistan  | AFG          | 2010 | 11.57      | 6.51        | 15.39       |
| Afghanistan  | AFG          | 2011 | 12.46      | 9.61        | 17.02       |
| Afghanistan  | AFG          | 2012 | 13.36      | 10.39       | 18.48       |
| Afghanistan  | AFG          | 2013 | 14.41      | 11.30       | 20.01       |
| Afghanistan  | AFG          | 2014 | 15.42      | 12.08       | 21.09       |
| Afghanistan  | AFG          | 2015 | 16.42      | 12.62       | 22.33       |
| Afghanistan  | AFG          | 2016 | 17.16      | 12.95       | 23.37       |
| Afghanistan  | AFG          | 2017 | 18.23      | 13.74       | 24.54       |
| Angola       | AGO          | 1990 | 7.59       | 5.82        | 11.80       |
| Angola       | AGO          | 1991 | 7.95       | 6.04        | 12.62       |
| Angola       | AGO          | 1992 | 8.20       | 6.22        | 12.42       |
| Angola       | AGO          | 1993 | 8.41       | 6.36        | 12.63       |
| Angola       | AGO          | 1994 | 8.81       | 6.44        | 13.11       |
| Angola       | AGO          | 1995 | 9.99       | 6.67        | 17.03       |
| Angola       | AGO          | 1996 | 11.84      | 7.08        | 19.70       |
| Angola       | AGO          | 1997 | 13.03      | 7.36        | 20.66       |
| Angola       | AGO          | 1998 | 12.43      | 7.40        | 18.93       |
| Angola       | AGO          | 1999 | 14.08      | 7.75        | 21.22       |
| Angola       | AGO          | 2000 | 15.84      | 8.11        | 22.61       |
| Angola       | AGO          | 2001 | 16.99      | 9.25        | 23.94       |
| Angola       | AGO          | 2002 | 19.12      | 10.96       | 25.63       |
| Angola       | AGO          | 2003 | 20.08      | 11.54       | 26.44       |
| Angola       | AGO          | 2004 | 21.99      | 12.75       | 28.02       |
| Angola       | AGO          | 2005 | 23.75      | 13.77       | 29.80       |
| Angola       | AGO          | 2006 | 25.35      | 14.97       | 30.96       |
| Angola       | AGO          | 2007 | 27.30      | 15.90       | 32.79       |
| Angola       | AGO          | 2008 | 28.75      | 16.69       | 33.94       |
| Angola       | AGO          | 2009 | 30.13      | 17.90       | 35.18       |
| Angola       | AGO          | 2010 | 31.71      | 25.38       | 36.57       |
| Angola       | AGO          | 2011 | 33.21      | 27.59       | 37.66       |
| Angola       | AGO          | 2012 | 34.46      | 29.48       | 39.00       |
| Angola       | AGO          | 2013 | 35.70      | 30.97       | 39.95       |
| Angola       | AGO          | 2014 | 37.30      | 32.59       | 41.54       |
| Angola       | AGO          | 2015 | 38.40      | 33.84       | 42.61       |
| Angola       | AGO          | 2016 | 39.52      | 35.02       | 43.88       |
| Angola       | AGO          | 2017 | 40.42      | 35.85       | 44.89       |
| Albania      | ALB          | 1990 | 45.20      | 37.48       | 53.61       |
| Albania      | ALB          | 1991 | 44.23      | 37.55       | 53.15       |
| Albania      | ALB          | 1992 | 43.59      | 38.00       | 52.94       |
| Albania      | ALB          | 1993 | 42.69      | 38.63       | 52.54       |

|                      |     |      |       |       |       |
|----------------------|-----|------|-------|-------|-------|
| Albania              | ALB | 1994 | 42.06 | 39.48 | 51.20 |
| Albania              | ALB | 1995 | 41.57 | 39.72 | 46.52 |
| Albania              | ALB | 1996 | 41.76 | 40.32 | 43.07 |
| Albania              | ALB | 1997 | 41.88 | 40.43 | 43.13 |
| Albania              | ALB | 1998 | 42.46 | 41.13 | 43.71 |
| Albania              | ALB | 1999 | 43.05 | 41.75 | 44.26 |
| Albania              | ALB | 2000 | 43.49 | 42.22 | 44.68 |
| Albania              | ALB | 2001 | 44.31 | 43.13 | 45.43 |
| Albania              | ALB | 2002 | 44.75 | 43.65 | 45.82 |
| Albania              | ALB | 2003 | 45.18 | 44.09 | 46.11 |
| Albania              | ALB | 2004 | 45.67 | 44.58 | 46.60 |
| Albania              | ALB | 2005 | 46.14 | 45.13 | 47.13 |
| Albania              | ALB | 2006 | 46.71 | 45.70 | 47.65 |
| Albania              | ALB | 2007 | 47.64 | 46.55 | 49.11 |
| Albania              | ALB | 2008 | 48.17 | 46.81 | 53.79 |
| Albania              | ALB | 2009 | 49.88 | 47.28 | 59.59 |
| Albania              | ALB | 2010 | 52.89 | 47.73 | 62.77 |
| Albania              | ALB | 2011 | 56.60 | 48.00 | 65.40 |
| Albania              | ALB | 2012 | 60.21 | 48.53 | 67.44 |
| Albania              | ALB | 2013 | 63.46 | 49.69 | 69.55 |
| Albania              | ALB | 2014 | 63.50 | 49.54 | 70.18 |
| Albania              | ALB | 2015 | 63.38 | 49.61 | 70.65 |
| Albania              | ALB | 2016 | 63.35 | 49.78 | 71.18 |
| Albania              | ALB | 2017 | 63.72 | 49.82 | 71.93 |
| Andorra              | AND | 1990 | 80.73 | 74.65 | 85.16 |
| Andorra              | AND | 1991 | 80.79 | 74.28 | 85.17 |
| Andorra              | AND | 1992 | 80.54 | 73.60 | 85.00 |
| Andorra              | AND | 1993 | 80.34 | 73.28 | 85.29 |
| Andorra              | AND | 1994 | 79.95 | 71.91 | 85.33 |
| Andorra              | AND | 1995 | 79.67 | 69.42 | 85.70 |
| Andorra              | AND | 1996 | 79.48 | 65.84 | 86.15 |
| Andorra              | AND | 1997 | 78.94 | 59.33 | 86.35 |
| Andorra              | AND | 1998 | 78.28 | 59.27 | 86.42 |
| Andorra              | AND | 1999 | 77.83 | 59.27 | 86.75 |
| Andorra              | AND | 2000 | 77.57 | 59.47 | 86.97 |
| Andorra              | AND | 2001 | 78.13 | 59.89 | 87.36 |
| Andorra              | AND | 2002 | 78.48 | 60.28 | 87.82 |
| Andorra              | AND | 2003 | 78.59 | 60.47 | 88.09 |
| Andorra              | AND | 2004 | 78.53 | 60.59 | 88.17 |
| Andorra              | AND | 2005 | 77.55 | 60.80 | 87.96 |
| Andorra              | AND | 2006 | 76.56 | 60.99 | 87.73 |
| Andorra              | AND | 2007 | 76.00 | 61.15 | 87.71 |
| Andorra              | AND | 2008 | 75.52 | 61.36 | 87.67 |
| Andorra              | AND | 2009 | 74.54 | 61.42 | 87.55 |
| Andorra              | AND | 2010 | 74.80 | 61.53 | 87.82 |
| Andorra              | AND | 2011 | 75.30 | 61.76 | 88.22 |
| Andorra              | AND | 2012 | 75.44 | 61.79 | 88.35 |
| Andorra              | AND | 2013 | 75.70 | 61.93 | 88.51 |
| Andorra              | AND | 2014 | 75.79 | 62.06 | 88.60 |
| Andorra              | AND | 2015 | 75.98 | 62.21 | 88.58 |
| Andorra              | AND | 2016 | 76.12 | 62.29 | 88.64 |
| Andorra              | AND | 2017 | 75.93 | 62.37 | 88.70 |
| United Arab Emirates | ARE | 1990 | 47.53 | 43.54 | 51.39 |
| United Arab Emirates | ARE | 1991 | 48.04 | 44.14 | 51.74 |
| United Arab Emirates | ARE | 1992 | 48.60 | 44.72 | 52.21 |
| United Arab Emirates | ARE | 1993 | 49.20 | 45.49 | 52.74 |
| United Arab Emirates | ARE | 1994 | 49.77 | 45.95 | 53.26 |
| United Arab Emirates | ARE | 1995 | 50.25 | 46.46 | 53.63 |
| United Arab Emirates | ARE | 1996 | 50.92 | 47.09 | 54.23 |
| United Arab Emirates | ARE | 1997 | 51.70 | 47.98 | 55.06 |
| United Arab Emirates | ARE | 1998 | 52.13 | 48.41 | 55.60 |
| United Arab Emirates | ARE | 1999 | 51.88 | 47.87 | 55.30 |

|                      |     |      |       |       |       |
|----------------------|-----|------|-------|-------|-------|
| United Arab Emirates | ARE | 2000 | 51.60 | 47.14 | 55.34 |
| United Arab Emirates | ARE | 2001 | 51.48 | 46.74 | 55.36 |
| United Arab Emirates | ARE | 2002 | 52.05 | 46.92 | 56.11 |
| United Arab Emirates | ARE | 2003 | 51.93 | 46.30 | 56.33 |
| United Arab Emirates | ARE | 2004 | 52.17 | 45.62 | 56.98 |
| United Arab Emirates | ARE | 2005 | 53.02 | 44.81 | 58.19 |
| United Arab Emirates | ARE | 2006 | 52.83 | 40.43 | 58.53 |
| United Arab Emirates | ARE | 2007 | 53.07 | 39.68 | 59.05 |
| United Arab Emirates | ARE | 2008 | 53.29 | 39.96 | 59.64 |
| United Arab Emirates | ARE | 2009 | 53.28 | 40.14 | 59.87 |
| United Arab Emirates | ARE | 2010 | 53.43 | 40.27 | 60.14 |
| United Arab Emirates | ARE | 2011 | 53.71 | 40.49 | 60.70 |
| United Arab Emirates | ARE | 2012 | 54.12 | 40.63 | 61.25 |
| United Arab Emirates | ARE | 2013 | 53.95 | 40.72 | 61.61 |
| United Arab Emirates | ARE | 2014 | 53.86 | 40.78 | 61.94 |
| United Arab Emirates | ARE | 2015 | 53.74 | 40.59 | 62.18 |
| United Arab Emirates | ARE | 2016 | 53.89 | 40.73 | 62.65 |
| United Arab Emirates | ARE | 2017 | 54.02 | 40.98 | 62.99 |
| Argentina            | ARG | 1990 | 61.61 | 59.35 | 63.62 |
| Argentina            | ARG | 1991 | 62.14 | 59.87 | 64.10 |
| Argentina            | ARG | 1992 | 62.26 | 60.05 | 64.10 |
| Argentina            | ARG | 1993 | 63.14 | 60.93 | 65.01 |
| Argentina            | ARG | 1994 | 64.02 | 61.77 | 65.87 |
| Argentina            | ARG | 1995 | 65.14 | 62.91 | 67.00 |
| Argentina            | ARG | 1996 | 65.32 | 63.16 | 67.14 |
| Argentina            | ARG | 1997 | 65.89 | 63.80 | 67.63 |
| Argentina            | ARG | 1998 | 66.42 | 64.33 | 68.09 |
| Argentina            | ARG | 1999 | 66.69 | 64.66 | 68.36 |
| Argentina            | ARG | 2000 | 67.91 | 65.84 | 69.60 |
| Argentina            | ARG | 2001 | 68.31 | 66.27 | 70.01 |
| Argentina            | ARG | 2002 | 68.44 | 66.44 | 70.11 |
| Argentina            | ARG | 2003 | 69.16 | 67.17 | 70.82 |
| Argentina            | ARG | 2004 | 70.53 | 68.63 | 72.21 |
| Argentina            | ARG | 2005 | 71.48 | 69.70 | 73.12 |
| Argentina            | ARG | 2006 | 72.17 | 70.44 | 73.75 |
| Argentina            | ARG | 2007 | 72.28 | 70.62 | 73.82 |
| Argentina            | ARG | 2008 | 73.15 | 71.43 | 74.71 |
| Argentina            | ARG | 2009 | 73.38 | 71.64 | 74.96 |
| Argentina            | ARG | 2010 | 74.19 | 72.38 | 75.87 |
| Argentina            | ARG | 2011 | 74.57 | 72.63 | 76.30 |
| Argentina            | ARG | 2012 | 74.88 | 72.77 | 76.64 |
| Argentina            | ARG | 2013 | 75.29 | 73.13 | 77.10 |
| Argentina            | ARG | 2014 | 76.03 | 73.76 | 77.80 |
| Argentina            | ARG | 2015 | 76.42 | 74.12 | 78.20 |
| Argentina            | ARG | 2016 | 76.52 | 74.07 | 78.60 |
| Argentina            | ARG | 2017 | 76.78 | 73.83 | 79.57 |
| Armenia              | ARM | 1990 | 57.15 | 54.14 | 59.86 |
| Armenia              | ARM | 1991 | 56.31 | 53.37 | 58.91 |
| Armenia              | ARM | 1992 | 55.19 | 52.44 | 57.75 |
| Armenia              | ARM | 1993 | 55.04 | 52.35 | 57.53 |
| Armenia              | ARM | 1994 | 55.94 | 53.14 | 58.38 |
| Armenia              | ARM | 1995 | 56.99 | 54.08 | 59.45 |
| Armenia              | ARM | 1996 | 57.37 | 54.36 | 59.89 |
| Armenia              | ARM | 1997 | 58.40 | 55.23 | 60.99 |
| Armenia              | ARM | 1998 | 59.42 | 56.13 | 62.02 |
| Armenia              | ARM | 1999 | 60.08 | 56.82 | 62.75 |
| Armenia              | ARM | 2000 | 60.71 | 57.26 | 63.39 |
| Armenia              | ARM | 2001 | 61.45 | 58.14 | 64.00 |
| Armenia              | ARM | 2002 | 62.03 | 58.72 | 64.41 |
| Armenia              | ARM | 2003 | 62.31 | 58.99 | 64.71 |
| Armenia              | ARM | 2004 | 62.66 | 59.41 | 65.08 |
| Armenia              | ARM | 2005 | 63.39 | 60.09 | 65.91 |

|                     |     |      |       |       |       |
|---------------------|-----|------|-------|-------|-------|
| Armenia             | ARM | 2006 | 63.27 | 59.42 | 66.08 |
| Armenia             | ARM | 2007 | 63.38 | 58.61 | 66.71 |
| Armenia             | ARM | 2008 | 62.61 | 56.65 | 66.33 |
| Armenia             | ARM | 2009 | 62.20 | 54.52 | 66.25 |
| Armenia             | ARM | 2010 | 61.94 | 50.15 | 66.64 |
| Armenia             | ARM | 2011 | 62.14 | 47.90 | 67.42 |
| Armenia             | ARM | 2012 | 62.61 | 48.50 | 68.31 |
| Armenia             | ARM | 2013 | 63.07 | 49.06 | 69.33 |
| Armenia             | ARM | 2014 | 63.22 | 49.44 | 69.88 |
| Armenia             | ARM | 2015 | 62.41 | 49.43 | 69.77 |
| Armenia             | ARM | 2016 | 61.79 | 49.48 | 69.91 |
| Armenia             | ARM | 2017 | 61.48 | 49.60 | 70.03 |
| American Samoa      | ASM | 1990 | 57.08 | 54.10 | 59.79 |
| American Samoa      | ASM | 1991 | 57.02 | 53.94 | 59.78 |
| American Samoa      | ASM | 1992 | 57.03 | 53.93 | 59.82 |
| American Samoa      | ASM | 1993 | 57.23 | 54.09 | 60.10 |
| American Samoa      | ASM | 1994 | 57.28 | 54.03 | 60.10 |
| American Samoa      | ASM | 1995 | 57.35 | 54.05 | 60.23 |
| American Samoa      | ASM | 1996 | 57.39 | 54.02 | 60.25 |
| American Samoa      | ASM | 1997 | 57.44 | 53.95 | 60.43 |
| American Samoa      | ASM | 1998 | 57.44 | 53.74 | 60.55 |
| American Samoa      | ASM | 1999 | 57.46 | 53.47 | 60.57 |
| American Samoa      | ASM | 2000 | 57.42 | 53.28 | 60.71 |
| American Samoa      | ASM | 2001 | 57.45 | 53.28 | 60.81 |
| American Samoa      | ASM | 2002 | 57.25 | 52.77 | 60.70 |
| American Samoa      | ASM | 2003 | 56.98 | 52.40 | 60.55 |
| American Samoa      | ASM | 2004 | 56.67 | 52.01 | 60.45 |
| American Samoa      | ASM | 2005 | 56.75 | 52.21 | 60.49 |
| American Samoa      | ASM | 2006 | 56.77 | 51.83 | 60.67 |
| American Samoa      | ASM | 2007 | 56.81 | 51.44 | 60.83 |
| American Samoa      | ASM | 2008 | 57.03 | 51.59 | 61.03 |
| American Samoa      | ASM | 2009 | 57.07 | 51.46 | 61.11 |
| American Samoa      | ASM | 2010 | 57.33 | 51.22 | 61.37 |
| American Samoa      | ASM | 2011 | 57.42 | 51.36 | 61.48 |
| American Samoa      | ASM | 2012 | 57.42 | 50.50 | 61.60 |
| American Samoa      | ASM | 2013 | 57.43 | 49.76 | 61.95 |
| American Samoa      | ASM | 2014 | 57.55 | 49.29 | 62.17 |
| American Samoa      | ASM | 2015 | 57.51 | 49.15 | 62.41 |
| American Samoa      | ASM | 2016 | 57.56 | 48.72 | 62.55 |
| American Samoa      | ASM | 2017 | 57.68 | 48.47 | 62.96 |
| Antigua and Barbuda | ATG | 1990 | 63.14 | 60.55 | 65.38 |
| Antigua and Barbuda | ATG | 1991 | 63.41 | 60.76 | 65.67 |
| Antigua and Barbuda | ATG | 1992 | 63.53 | 60.81 | 65.88 |
| Antigua and Barbuda | ATG | 1993 | 63.65 | 60.84 | 66.08 |
| Antigua and Barbuda | ATG | 1994 | 63.84 | 61.05 | 66.29 |
| Antigua and Barbuda | ATG | 1995 | 64.19 | 61.29 | 66.67 |
| Antigua and Barbuda | ATG | 1996 | 64.74 | 61.88 | 67.18 |
| Antigua and Barbuda | ATG | 1997 | 65.51 | 62.73 | 67.91 |
| Antigua and Barbuda | ATG | 1998 | 66.39 | 63.75 | 68.78 |
| Antigua and Barbuda | ATG | 1999 | 67.22 | 64.59 | 69.58 |
| Antigua and Barbuda | ATG | 2000 | 68.05 | 65.50 | 70.36 |
| Antigua and Barbuda | ATG | 2001 | 68.82 | 66.25 | 71.08 |
| Antigua and Barbuda | ATG | 2002 | 69.57 | 66.96 | 71.82 |
| Antigua and Barbuda | ATG | 2003 | 70.31 | 67.68 | 72.57 |
| Antigua and Barbuda | ATG | 2004 | 71.01 | 68.31 | 73.25 |
| Antigua and Barbuda | ATG | 2005 | 71.66 | 68.87 | 73.93 |
| Antigua and Barbuda | ATG | 2006 | 72.36 | 69.56 | 74.66 |
| Antigua and Barbuda | ATG | 2007 | 73.14 | 70.31 | 75.48 |
| Antigua and Barbuda | ATG | 2008 | 73.82 | 70.98 | 76.23 |
| Antigua and Barbuda | ATG | 2009 | 74.49 | 71.78 | 76.87 |
| Antigua and Barbuda | ATG | 2010 | 74.92 | 72.33 | 77.26 |
| Antigua and Barbuda | ATG | 2011 | 75.16 | 72.55 | 77.49 |



|                     |     |      |       |       |       |
|---------------------|-----|------|-------|-------|-------|
| Antigua and Barbuda | ATG | 2012 | 75.38 | 72.73 | 77.64 |
| Antigua and Barbuda | ATG | 2013 | 75.60 | 72.90 | 77.84 |
| Antigua and Barbuda | ATG | 2014 | 75.58 | 72.74 | 77.87 |
| Antigua and Barbuda | ATG | 2015 | 75.81 | 72.95 | 78.24 |
| Antigua and Barbuda | ATG | 2016 | 76.00 | 73.13 | 78.55 |
| Antigua and Barbuda | ATG | 2017 | 76.26 | 73.19 | 78.82 |
| Australia           | AUS | 1990 | 78.45 | 76.91 | 79.88 |
| Australia           | AUS | 1991 | 79.39 | 77.95 | 80.82 |
| Australia           | AUS | 1992 | 79.98 | 78.51 | 81.37 |
| Australia           | AUS | 1993 | 81.05 | 79.62 | 82.43 |
| Australia           | AUS | 1994 | 81.46 | 80.03 | 82.80 |
| Australia           | AUS | 1995 | 82.40 | 80.95 | 83.74 |
| Australia           | AUS | 1996 | 83.30 | 81.88 | 84.63 |
| Australia           | AUS | 1997 | 83.94 | 82.48 | 85.19 |
| Australia           | AUS | 1998 | 84.67 | 83.16 | 85.95 |
| Australia           | AUS | 1999 | 85.48 | 83.92 | 86.78 |
| Australia           | AUS | 2000 | 86.05 | 84.43 | 87.39 |
| Australia           | AUS | 2001 | 86.78 | 85.11 | 88.19 |
| Australia           | AUS | 2002 | 87.20 | 85.42 | 88.67 |
| Australia           | AUS | 2003 | 87.78 | 85.88 | 89.37 |
| Australia           | AUS | 2004 | 88.23 | 86.05 | 89.91 |
| Australia           | AUS | 2005 | 88.70 | 86.40 | 90.55 |
| Australia           | AUS | 2006 | 89.15 | 86.82 | 91.02 |
| Australia           | AUS | 2007 | 89.23 | 86.80 | 91.20 |
| Australia           | AUS | 2008 | 89.36 | 86.59 | 91.50 |
| Australia           | AUS | 2009 | 89.34 | 86.43 | 91.54 |
| Australia           | AUS | 2010 | 89.28 | 86.12 | 91.59 |
| Australia           | AUS | 2011 | 89.21 | 85.95 | 91.71 |
| Australia           | AUS | 2012 | 89.17 | 85.57 | 91.81 |
| Australia           | AUS | 2013 | 89.03 | 84.91 | 91.86 |
| Australia           | AUS | 2014 | 88.88 | 84.58 | 91.83 |
| Australia           | AUS | 2015 | 88.79 | 84.40 | 91.86 |
| Australia           | AUS | 2016 | 88.69 | 83.76 | 91.95 |
| Australia           | AUS | 2017 | 88.65 | 83.62 | 92.07 |
| Austria             | AUT | 1990 | 77.86 | 74.60 | 80.14 |
| Austria             | AUT | 1991 | 77.82 | 74.43 | 80.17 |
| Austria             | AUT | 1992 | 78.14 | 74.56 | 80.62 |
| Austria             | AUT | 1993 | 78.23 | 74.57 | 80.80 |
| Austria             | AUT | 1994 | 78.68 | 74.69 | 81.35 |
| Austria             | AUT | 1995 | 78.82 | 74.56 | 81.72 |
| Austria             | AUT | 1996 | 79.48 | 74.82 | 82.53 |
| Austria             | AUT | 1997 | 80.26 | 75.14 | 83.47 |
| Austria             | AUT | 1998 | 80.53 | 74.95 | 83.87 |
| Austria             | AUT | 1999 | 80.86 | 74.97 | 84.45 |
| Austria             | AUT | 2000 | 81.29 | 74.92 | 84.94 |
| Austria             | AUT | 2001 | 81.94 | 75.47 | 85.68 |
| Austria             | AUT | 2002 | 82.38 | 75.53 | 86.24 |
| Austria             | AUT | 2003 | 82.88 | 76.07 | 86.74 |
| Austria             | AUT | 2004 | 83.51 | 76.77 | 87.52 |
| Austria             | AUT | 2005 | 84.12 | 77.58 | 88.06 |
| Austria             | AUT | 2006 | 85.06 | 78.47 | 89.01 |
| Austria             | AUT | 2007 | 85.49 | 79.06 | 89.33 |
| Austria             | AUT | 2008 | 86.29 | 79.95 | 90.01 |
| Austria             | AUT | 2009 | 85.29 | 77.99 | 89.38 |
| Austria             | AUT | 2010 | 85.08 | 76.59 | 89.51 |
| Austria             | AUT | 2011 | 85.12 | 75.27 | 89.83 |
| Austria             | AUT | 2012 | 85.35 | 74.98 | 90.39 |
| Austria             | AUT | 2013 | 85.47 | 74.32 | 90.50 |
| Austria             | AUT | 2014 | 85.50 | 74.50 | 90.71 |
| Austria             | AUT | 2015 | 85.54 | 74.09 | 90.78 |
| Austria             | AUT | 2016 | 85.78 | 74.55 | 91.17 |
| Austria             | AUT | 2017 | 85.75 | 75.17 | 91.26 |

|            |     |      |       |       |       |
|------------|-----|------|-------|-------|-------|
| Azerbaijan | AZE | 1990 | 53.71 | 51.18 | 56.08 |
| Azerbaijan | AZE | 1991 | 52.00 | 49.51 | 54.41 |
| Azerbaijan | AZE | 1992 | 49.57 | 46.93 | 52.09 |
| Azerbaijan | AZE | 1993 | 47.95 | 45.12 | 50.58 |
| Azerbaijan | AZE | 1994 | 45.83 | 42.77 | 48.68 |
| Azerbaijan | AZE | 1995 | 47.12 | 44.25 | 49.82 |
| Azerbaijan | AZE | 1996 | 47.81 | 44.95 | 50.38 |
| Azerbaijan | AZE | 1997 | 49.02 | 46.34 | 51.57 |
| Azerbaijan | AZE | 1998 | 49.99 | 47.48 | 52.28 |
| Azerbaijan | AZE | 1999 | 51.24 | 48.87 | 53.44 |
| Azerbaijan | AZE | 2000 | 52.47 | 50.15 | 54.64 |
| Azerbaijan | AZE | 2001 | 53.04 | 50.65 | 55.32 |
| Azerbaijan | AZE | 2002 | 52.93 | 50.58 | 55.17 |
| Azerbaijan | AZE | 2003 | 52.73 | 50.34 | 55.07 |
| Azerbaijan | AZE | 2004 | 52.63 | 50.13 | 55.06 |
| Azerbaijan | AZE | 2005 | 52.72 | 50.02 | 55.24 |
| Azerbaijan | AZE | 2006 | 53.31 | 50.01 | 56.13 |
| Azerbaijan | AZE | 2007 | 54.14 | 50.24 | 57.31 |
| Azerbaijan | AZE | 2008 | 54.15 | 49.44 | 57.71 |
| Azerbaijan | AZE | 2009 | 54.28 | 48.30 | 58.39 |
| Azerbaijan | AZE | 2010 | 54.10 | 45.62 | 58.73 |
| Azerbaijan | AZE | 2011 | 53.77 | 41.21 | 59.01 |
| Azerbaijan | AZE | 2012 | 53.49 | 41.25 | 59.40 |
| Azerbaijan | AZE | 2013 | 53.39 | 41.53 | 59.84 |
| Azerbaijan | AZE | 2014 | 53.34 | 42.00 | 60.35 |
| Azerbaijan | AZE | 2015 | 52.77 | 42.18 | 60.58 |
| Azerbaijan | AZE | 2016 | 52.31 | 42.24 | 60.84 |
| Azerbaijan | AZE | 2017 | 52.30 | 42.27 | 61.20 |
| Burundi    | BDI | 1990 | 6.81  | 3.61  | 10.32 |
| Burundi    | BDI | 1991 | 7.50  | 3.98  | 11.13 |
| Burundi    | BDI | 1992 | 8.19  | 4.32  | 11.72 |
| Burundi    | BDI | 1993 | 6.93  | 3.86  | 10.00 |
| Burundi    | BDI | 1994 | 8.94  | 4.86  | 12.21 |
| Burundi    | BDI | 1995 | 8.71  | 4.94  | 12.19 |
| Burundi    | BDI | 1996 | 8.84  | 5.07  | 12.57 |
| Burundi    | BDI | 1997 | 10.14 | 5.93  | 13.81 |
| Burundi    | BDI | 1998 | 11.68 | 7.01  | 15.17 |
| Burundi    | BDI | 1999 | 13.39 | 8.40  | 16.68 |
| Burundi    | BDI | 2000 | 14.77 | 9.91  | 18.17 |
| Burundi    | BDI | 2001 | 17.24 | 11.91 | 20.37 |
| Burundi    | BDI | 2002 | 18.85 | 13.25 | 22.02 |
| Burundi    | BDI | 2003 | 20.60 | 16.52 | 23.68 |
| Burundi    | BDI | 2004 | 22.09 | 18.76 | 25.14 |
| Burundi    | BDI | 2005 | 23.46 | 20.17 | 26.46 |
| Burundi    | BDI | 2006 | 24.84 | 21.30 | 27.95 |
| Burundi    | BDI | 2007 | 26.15 | 22.58 | 29.33 |
| Burundi    | BDI | 2008 | 27.37 | 23.77 | 30.60 |
| Burundi    | BDI | 2009 | 28.69 | 25.11 | 31.94 |
| Burundi    | BDI | 2010 | 29.80 | 26.23 | 33.10 |
| Burundi    | BDI | 2011 | 30.67 | 27.10 | 34.07 |
| Burundi    | BDI | 2012 | 31.43 | 27.78 | 34.92 |
| Burundi    | BDI | 2013 | 32.33 | 28.85 | 35.86 |
| Burundi    | BDI | 2014 | 33.00 | 29.40 | 36.56 |
| Burundi    | BDI | 2015 | 33.56 | 29.95 | 37.17 |
| Burundi    | BDI | 2016 | 34.36 | 30.73 | 38.03 |
| Burundi    | BDI | 2017 | 34.80 | 31.05 | 38.43 |
| Belgium    | BEL | 1990 | 76.78 | 73.54 | 79.16 |
| Belgium    | BEL | 1991 | 77.25 | 73.89 | 79.70 |
| Belgium    | BEL | 1992 | 77.59 | 74.00 | 80.21 |
| Belgium    | BEL | 1993 | 77.95 | 74.12 | 80.72 |
| Belgium    | BEL | 1994 | 78.07 | 73.90 | 81.09 |
| Belgium    | BEL | 1995 | 78.30 | 73.80 | 81.48 |

|              |     |      |       |       |       |
|--------------|-----|------|-------|-------|-------|
| Belgium      | BEL | 1996 | 78.91 | 74.13 | 82.18 |
| Belgium      | BEL | 1997 | 79.61 | 74.69 | 83.03 |
| Belgium      | BEL | 1998 | 79.95 | 74.83 | 83.57 |
| Belgium      | BEL | 1999 | 80.32 | 74.85 | 84.04 |
| Belgium      | BEL | 2000 | 80.74 | 75.17 | 84.50 |
| Belgium      | BEL | 2001 | 81.32 | 75.54 | 85.11 |
| Belgium      | BEL | 2002 | 81.69 | 75.43 | 85.55 |
| Belgium      | BEL | 2003 | 82.55 | 76.07 | 86.31 |
| Belgium      | BEL | 2004 | 83.55 | 77.10 | 87.25 |
| Belgium      | BEL | 2005 | 84.20 | 78.07 | 87.74 |
| Belgium      | BEL | 2006 | 85.39 | 79.24 | 88.79 |
| Belgium      | BEL | 2007 | 85.92 | 80.10 | 89.16 |
| Belgium      | BEL | 2008 | 85.77 | 79.27 | 89.13 |
| Belgium      | BEL | 2009 | 85.88 | 79.13 | 89.37 |
| Belgium      | BEL | 2010 | 86.04 | 78.80 | 89.66 |
| Belgium      | BEL | 2011 | 86.08 | 78.70 | 89.85 |
| Belgium      | BEL | 2012 | 86.23 | 78.64 | 90.18 |
| Belgium      | BEL | 2013 | 86.58 | 78.70 | 90.75 |
| Belgium      | BEL | 2014 | 87.17 | 78.81 | 91.51 |
| Belgium      | BEL | 2015 | 87.25 | 78.01 | 91.73 |
| Belgium      | BEL | 2016 | 87.71 | 78.73 | 92.24 |
| Belgium      | BEL | 2017 | 87.88 | 79.31 | 92.61 |
| Benin        | BEN | 1990 | 8.96  | 8.41  | 9.49  |
| Benin        | BEN | 1991 | 9.11  | 8.57  | 9.63  |
| Benin        | BEN | 1992 | 9.23  | 8.72  | 9.76  |
| Benin        | BEN | 1993 | 9.52  | 8.87  | 10.44 |
| Benin        | BEN | 1994 | 10.11 | 9.19  | 11.06 |
| Benin        | BEN | 1995 | 10.74 | 9.88  | 11.60 |
| Benin        | BEN | 1996 | 11.29 | 10.47 | 12.10 |
| Benin        | BEN | 1997 | 11.76 | 10.96 | 12.57 |
| Benin        | BEN | 1998 | 12.21 | 11.43 | 13.00 |
| Benin        | BEN | 1999 | 12.63 | 11.86 | 13.43 |
| Benin        | BEN | 2000 | 12.98 | 12.21 | 13.81 |
| Benin        | BEN | 2001 | 13.32 | 12.49 | 14.19 |
| Benin        | BEN | 2002 | 13.60 | 12.71 | 14.49 |
| Benin        | BEN | 2003 | 13.92 | 13.04 | 14.84 |
| Benin        | BEN | 2004 | 14.32 | 13.38 | 15.25 |
| Benin        | BEN | 2005 | 14.71 | 13.76 | 15.65 |
| Benin        | BEN | 2006 | 14.98 | 13.98 | 15.94 |
| Benin        | BEN | 2007 | 15.25 | 14.20 | 16.29 |
| Benin        | BEN | 2008 | 15.64 | 14.59 | 16.64 |
| Benin        | BEN | 2009 | 15.87 | 14.80 | 16.89 |
| Benin        | BEN | 2010 | 16.18 | 15.07 | 17.21 |
| Benin        | BEN | 2011 | 16.44 | 15.31 | 17.51 |
| Benin        | BEN | 2012 | 16.67 | 15.47 | 17.74 |
| Benin        | BEN | 2013 | 16.97 | 15.70 | 18.09 |
| Benin        | BEN | 2014 | 17.34 | 16.00 | 18.47 |
| Benin        | BEN | 2015 | 17.69 | 16.26 | 18.86 |
| Benin        | BEN | 2016 | 18.01 | 16.53 | 19.27 |
| Benin        | BEN | 2017 | 18.40 | 16.94 | 19.67 |
| Burkina Faso | BFA | 1990 | 12.38 | 7.68  | 16.19 |
| Burkina Faso | BFA | 1991 | 12.69 | 7.79  | 16.34 |
| Burkina Faso | BFA | 1992 | 12.86 | 7.79  | 16.36 |
| Burkina Faso | BFA | 1993 | 13.05 | 7.88  | 16.43 |
| Burkina Faso | BFA | 1994 | 13.18 | 7.84  | 16.30 |
| Burkina Faso | BFA | 1995 | 13.28 | 7.84  | 16.33 |
| Burkina Faso | BFA | 1996 | 13.50 | 7.87  | 16.22 |
| Burkina Faso | BFA | 1997 | 13.46 | 7.72  | 16.17 |
| Burkina Faso | BFA | 1998 | 13.40 | 7.71  | 15.95 |
| Burkina Faso | BFA | 1999 | 13.32 | 7.58  | 15.56 |
| Burkina Faso | BFA | 2000 | 13.14 | 7.41  | 15.30 |
| Burkina Faso | BFA | 2001 | 12.84 | 7.23  | 15.04 |

|              |     |      |       |       |       |
|--------------|-----|------|-------|-------|-------|
| Burkina Faso | BFA | 2002 | 12.18 | 6.93  | 14.29 |
| Burkina Faso | BFA | 2003 | 12.19 | 6.80  | 13.76 |
| Burkina Faso | BFA | 2004 | 12.39 | 6.92  | 13.90 |
| Burkina Faso | BFA | 2005 | 12.63 | 7.01  | 14.13 |
| Burkina Faso | BFA | 2006 | 12.76 | 9.84  | 14.24 |
| Burkina Faso | BFA | 2007 | 13.43 | 10.57 | 15.56 |
| Burkina Faso | BFA | 2008 | 15.43 | 12.54 | 17.30 |
| Burkina Faso | BFA | 2009 | 16.68 | 13.88 | 18.47 |
| Burkina Faso | BFA | 2010 | 17.43 | 14.66 | 19.20 |
| Burkina Faso | BFA | 2011 | 18.67 | 15.80 | 21.36 |
| Burkina Faso | BFA | 2012 | 20.60 | 17.17 | 23.42 |
| Burkina Faso | BFA | 2013 | 22.54 | 19.16 | 25.26 |
| Burkina Faso | BFA | 2014 | 24.30 | 21.14 | 26.97 |
| Burkina Faso | BFA | 2015 | 25.94 | 22.68 | 28.63 |
| Burkina Faso | BFA | 2016 | 27.40 | 24.13 | 30.08 |
| Burkina Faso | BFA | 2017 | 28.80 | 25.67 | 31.62 |
| Bangladesh   | BGD | 1990 | 17.82 | 9.49  | 21.17 |
| Bangladesh   | BGD | 1991 | 20.10 | 10.77 | 23.36 |
| Bangladesh   | BGD | 1992 | 21.04 | 11.44 | 24.19 |
| Bangladesh   | BGD | 1993 | 22.15 | 11.99 | 25.11 |
| Bangladesh   | BGD | 1994 | 23.26 | 12.85 | 26.07 |
| Bangladesh   | BGD | 1995 | 23.93 | 18.31 | 26.75 |
| Bangladesh   | BGD | 1996 | 25.21 | 13.70 | 27.96 |
| Bangladesh   | BGD | 1997 | 26.68 | 14.29 | 29.52 |
| Bangladesh   | BGD | 1998 | 28.43 | 21.69 | 31.18 |
| Bangladesh   | BGD | 1999 | 29.89 | 25.38 | 32.63 |
| Bangladesh   | BGD | 2000 | 30.62 | 26.32 | 33.25 |
| Bangladesh   | BGD | 2001 | 31.46 | 26.95 | 34.13 |
| Bangladesh   | BGD | 2002 | 32.24 | 28.20 | 34.91 |
| Bangladesh   | BGD | 2003 | 32.94 | 29.12 | 35.57 |
| Bangladesh   | BGD | 2004 | 33.98 | 30.06 | 36.45 |
| Bangladesh   | BGD | 2005 | 35.31 | 31.81 | 37.85 |
| Bangladesh   | BGD | 2006 | 35.86 | 32.43 | 38.25 |
| Bangladesh   | BGD | 2007 | 36.40 | 33.35 | 38.76 |
| Bangladesh   | BGD | 2008 | 37.28 | 34.18 | 39.57 |
| Bangladesh   | BGD | 2009 | 38.70 | 35.74 | 40.94 |
| Bangladesh   | BGD | 2010 | 39.85 | 37.01 | 42.14 |
| Bangladesh   | BGD | 2011 | 41.33 | 38.66 | 43.59 |
| Bangladesh   | BGD | 2012 | 42.58 | 39.91 | 44.81 |
| Bangladesh   | BGD | 2013 | 43.77 | 41.06 | 46.07 |
| Bangladesh   | BGD | 2014 | 44.66 | 41.94 | 46.98 |
| Bangladesh   | BGD | 2015 | 45.80 | 43.13 | 48.29 |
| Bangladesh   | BGD | 2016 | 46.77 | 44.03 | 49.31 |
| Bangladesh   | BGD | 2017 | 47.47 | 44.66 | 50.18 |
| Bulgaria     | BGR | 1990 | 60.65 | 55.97 | 63.77 |
| Bulgaria     | BGR | 1991 | 61.04 | 56.02 | 64.35 |
| Bulgaria     | BGR | 1992 | 59.93 | 54.71 | 63.30 |
| Bulgaria     | BGR | 1993 | 59.59 | 54.18 | 63.08 |
| Bulgaria     | BGR | 1994 | 58.35 | 52.39 | 61.91 |
| Bulgaria     | BGR | 1995 | 58.12 | 52.38 | 61.73 |
| Bulgaria     | BGR | 1996 | 58.14 | 52.26 | 62.03 |
| Bulgaria     | BGR | 1997 | 56.95 | 51.50 | 60.68 |
| Bulgaria     | BGR | 1998 | 58.28 | 53.04 | 61.88 |
| Bulgaria     | BGR | 1999 | 60.49 | 55.38 | 64.17 |
| Bulgaria     | BGR | 2000 | 60.40 | 54.61 | 64.15 |
| Bulgaria     | BGR | 2001 | 61.60 | 56.44 | 65.15 |
| Bulgaria     | BGR | 2002 | 62.23 | 56.96 | 65.76 |
| Bulgaria     | BGR | 2003 | 62.67 | 57.56 | 66.25 |
| Bulgaria     | BGR | 2004 | 62.63 | 57.12 | 66.36 |
| Bulgaria     | BGR | 2005 | 62.45 | 56.65 | 66.30 |
| Bulgaria     | BGR | 2006 | 62.52 | 55.82 | 66.59 |
| Bulgaria     | BGR | 2007 | 63.51 | 56.57 | 67.66 |

|          |     |      |       |       |       |
|----------|-----|------|-------|-------|-------|
| Bulgaria | BGR | 2008 | 64.42 | 56.88 | 68.59 |
| Bulgaria | BGR | 2009 | 64.90 | 57.26 | 69.17 |
| Bulgaria | BGR | 2010 | 65.04 | 56.26 | 69.56 |
| Bulgaria | BGR | 2011 | 65.27 | 55.08 | 70.06 |
| Bulgaria | BGR | 2012 | 65.95 | 54.46 | 70.96 |
| Bulgaria | BGR | 2013 | 66.14 | 53.90 | 71.25 |
| Bulgaria | BGR | 2014 | 64.99 | 51.64 | 70.25 |
| Bulgaria | BGR | 2015 | 65.07 | 48.61 | 70.72 |
| Bulgaria | BGR | 2016 | 64.50 | 48.38 | 70.50 |
| Bulgaria | BGR | 2017 | 64.26 | 48.13 | 70.92 |
| Bahrain  | BHR | 1990 | 42.11 | 32.67 | 45.95 |
| Bahrain  | BHR | 1991 | 42.54 | 32.64 | 46.44 |
| Bahrain  | BHR | 1992 | 43.27 | 34.74 | 46.89 |
| Bahrain  | BHR | 1993 | 44.75 | 39.38 | 47.86 |
| Bahrain  | BHR | 1994 | 45.74 | 40.83 | 48.74 |
| Bahrain  | BHR | 1995 | 46.49 | 42.22 | 49.35 |
| Bahrain  | BHR | 1996 | 47.68 | 44.01 | 50.33 |
| Bahrain  | BHR | 1997 | 48.75 | 45.50 | 51.37 |
| Bahrain  | BHR | 1998 | 50.11 | 46.95 | 52.58 |
| Bahrain  | BHR | 1999 | 52.15 | 48.97 | 54.57 |
| Bahrain  | BHR | 2000 | 54.92 | 51.47 | 57.38 |
| Bahrain  | BHR | 2001 | 57.12 | 53.99 | 59.41 |
| Bahrain  | BHR | 2002 | 59.15 | 56.35 | 61.33 |
| Bahrain  | BHR | 2003 | 60.49 | 57.83 | 62.55 |
| Bahrain  | BHR | 2004 | 62.05 | 59.55 | 64.04 |
| Bahrain  | BHR | 2005 | 64.23 | 61.73 | 66.21 |
| Bahrain  | BHR | 2006 | 66.45 | 64.05 | 68.45 |
| Bahrain  | BHR | 2007 | 68.56 | 66.40 | 70.48 |
| Bahrain  | BHR | 2008 | 69.96 | 67.66 | 72.00 |
| Bahrain  | BHR | 2009 | 71.28 | 68.73 | 73.45 |
| Bahrain  | BHR | 2010 | 72.22 | 69.44 | 74.45 |
| Bahrain  | BHR | 2011 | 72.97 | 70.01 | 75.24 |
| Bahrain  | BHR | 2012 | 73.78 | 70.72 | 76.13 |
| Bahrain  | BHR | 2013 | 74.40 | 71.12 | 76.90 |
| Bahrain  | BHR | 2014 | 74.82 | 71.24 | 77.52 |
| Bahrain  | BHR | 2015 | 75.24 | 71.22 | 78.10 |
| Bahrain  | BHR | 2016 | 75.59 | 71.21 | 78.62 |
| Bahrain  | BHR | 2017 | 75.91 | 71.02 | 79.14 |
| Bahamas  | BHS | 1990 | 59.48 | 56.01 | 62.37 |
| Bahamas  | BHS | 1991 | 60.05 | 56.20 | 63.10 |
| Bahamas  | BHS | 1992 | 60.53 | 56.31 | 63.74 |
| Bahamas  | BHS | 1993 | 60.74 | 56.10 | 64.07 |
| Bahamas  | BHS | 1994 | 60.84 | 55.91 | 64.26 |
| Bahamas  | BHS | 1995 | 61.33 | 56.44 | 64.80 |
| Bahamas  | BHS | 1996 | 61.20 | 56.00 | 64.66 |
| Bahamas  | BHS | 1997 | 62.55 | 57.10 | 66.09 |
| Bahamas  | BHS | 1998 | 63.33 | 57.96 | 66.88 |
| Bahamas  | BHS | 1999 | 63.27 | 57.84 | 66.91 |
| Bahamas  | BHS | 2000 | 64.19 | 58.43 | 67.82 |
| Bahamas  | BHS | 2001 | 64.38 | 58.13 | 68.17 |
| Bahamas  | BHS | 2002 | 65.58 | 58.56 | 69.46 |
| Bahamas  | BHS | 2003 | 66.69 | 59.63 | 70.52 |
| Bahamas  | BHS | 2004 | 67.07 | 60.07 | 70.83 |
| Bahamas  | BHS | 2005 | 67.69 | 61.08 | 71.41 |
| Bahamas  | BHS | 2006 | 67.79 | 61.63 | 71.45 |
| Bahamas  | BHS | 2007 | 68.65 | 62.70 | 72.30 |
| Bahamas  | BHS | 2008 | 68.89 | 63.10 | 72.48 |
| Bahamas  | BHS | 2009 | 69.16 | 63.58 | 72.65 |
| Bahamas  | BHS | 2010 | 69.73 | 64.57 | 73.03 |
| Bahamas  | BHS | 2011 | 69.93 | 64.78 | 73.21 |
| Bahamas  | BHS | 2012 | 70.54 | 65.45 | 73.75 |
| Bahamas  | BHS | 2013 | 70.69 | 65.32 | 74.04 |

|                        |     |      |       |       |       |
|------------------------|-----|------|-------|-------|-------|
| Bahamas                | BHS | 2014 | 70.64 | 65.02 | 74.19 |
| Bahamas                | BHS | 2015 | 70.64 | 64.75 | 74.35 |
| Bahamas                | BHS | 2016 | 70.79 | 64.85 | 74.59 |
| Bahamas                | BHS | 2017 | 71.01 | 64.84 | 74.92 |
| Bosnia and Herzegovina | BIH | 1990 | 54.71 | 51.99 | 57.16 |
| Bosnia and Herzegovina | BIH | 1991 | 53.38 | 50.77 | 55.72 |
| Bosnia and Herzegovina | BIH | 1992 | 52.38 | 49.68 | 55.03 |
| Bosnia and Herzegovina | BIH | 1993 | 52.19 | 49.02 | 55.43 |
| Bosnia and Herzegovina | BIH | 1994 | 52.65 | 49.04 | 56.24 |
| Bosnia and Herzegovina | BIH | 1995 | 53.61 | 49.87 | 57.20 |
| Bosnia and Herzegovina | BIH | 1996 | 56.09 | 52.84 | 59.30 |
| Bosnia and Herzegovina | BIH | 1997 | 57.77 | 54.96 | 60.56 |
| Bosnia and Herzegovina | BIH | 1998 | 59.49 | 56.85 | 62.01 |
| Bosnia and Herzegovina | BIH | 1999 | 59.70 | 56.61 | 62.59 |
| Bosnia and Herzegovina | BIH | 2000 | 59.14 | 55.60 | 62.41 |
| Bosnia and Herzegovina | BIH | 2001 | 58.88 | 55.19 | 62.14 |
| Bosnia and Herzegovina | BIH | 2002 | 58.79 | 54.95 | 62.03 |
| Bosnia and Herzegovina | BIH | 2003 | 58.91 | 54.56 | 62.21 |
| Bosnia and Herzegovina | BIH | 2004 | 58.51 | 52.97 | 62.15 |
| Bosnia and Herzegovina | BIH | 2005 | 56.87 | 49.09 | 61.17 |
| Bosnia and Herzegovina | BIH | 2006 | 55.35 | 44.94 | 60.77 |
| Bosnia and Herzegovina | BIH | 2007 | 56.40 | 45.51 | 61.28 |
| Bosnia and Herzegovina | BIH | 2008 | 59.01 | 51.05 | 63.56 |
| Bosnia and Herzegovina | BIH | 2009 | 60.62 | 53.76 | 64.84 |
| Bosnia and Herzegovina | BIH | 2010 | 61.91 | 54.99 | 66.20 |
| Bosnia and Herzegovina | BIH | 2011 | 62.90 | 55.94 | 67.26 |
| Bosnia and Herzegovina | BIH | 2012 | 64.03 | 56.80 | 68.45 |
| Bosnia and Herzegovina | BIH | 2013 | 64.32 | 56.81 | 68.84 |
| Bosnia and Herzegovina | BIH | 2014 | 64.82 | 57.19 | 69.48 |
| Bosnia and Herzegovina | BIH | 2015 | 64.72 | 55.18 | 69.71 |
| Bosnia and Herzegovina | BIH | 2016 | 65.14 | 53.47 | 70.46 |
| Bosnia and Herzegovina | BIH | 2017 | 65.50 | 50.87 | 71.28 |
| Belarus                | BLR | 1990 | 62.06 | 59.87 | 64.01 |
| Belarus                | BLR | 1991 | 61.19 | 58.97 | 63.16 |
| Belarus                | BLR | 1992 | 60.04 | 57.76 | 62.05 |
| Belarus                | BLR | 1993 | 57.27 | 54.94 | 59.42 |
| Belarus                | BLR | 1994 | 57.48 | 55.24 | 59.63 |
| Belarus                | BLR | 1995 | 56.43 | 54.05 | 58.63 |
| Belarus                | BLR | 1996 | 57.41 | 55.11 | 59.58 |
| Belarus                | BLR | 1997 | 57.74 | 55.49 | 59.87 |
| Belarus                | BLR | 1998 | 57.36 | 55.05 | 59.49 |
| Belarus                | BLR | 1999 | 56.91 | 54.55 | 59.06 |
| Belarus                | BLR | 2000 | 60.09 | 58.03 | 62.03 |
| Belarus                | BLR | 2001 | 58.38 | 56.16 | 60.43 |
| Belarus                | BLR | 2002 | 56.63 | 54.07 | 58.82 |
| Belarus                | BLR | 2003 | 59.12 | 56.79 | 61.09 |
| Belarus                | BLR | 2004 | 60.76 | 58.65 | 62.63 |
| Belarus                | BLR | 2005 | 60.41 | 58.25 | 62.31 |
| Belarus                | BLR | 2006 | 62.99 | 61.03 | 64.68 |
| Belarus                | BLR | 2007 | 65.95 | 64.29 | 67.55 |
| Belarus                | BLR | 2008 | 66.45 | 64.76 | 68.14 |
| Belarus                | BLR | 2009 | 66.78 | 65.00 | 68.53 |
| Belarus                | BLR | 2010 | 66.47 | 64.61 | 68.33 |
| Belarus                | BLR | 2011 | 66.39 | 64.30 | 68.41 |
| Belarus                | BLR | 2012 | 71.36 | 69.14 | 73.25 |
| Belarus                | BLR | 2013 | 72.42 | 69.99 | 74.43 |
| Belarus                | BLR | 2014 | 73.41 | 70.69 | 75.50 |
| Belarus                | BLR | 2015 | 75.00 | 71.91 | 77.19 |
| Belarus                | BLR | 2016 | 75.60 | 72.41 | 77.97 |
| Belarus                | BLR | 2017 | 75.60 | 71.84 | 78.41 |
| Belize                 | BLZ | 1990 | 52.12 | 48.77 | 54.97 |
| Belize                 | BLZ | 1991 | 52.67 | 49.39 | 55.33 |

|                           |     |      |       |       |       |
|---------------------------|-----|------|-------|-------|-------|
| Belize                    | BLZ | 1992 | 53.42 | 50.35 | 56.13 |
| Belize                    | BLZ | 1993 | 53.86 | 50.86 | 56.40 |
| Belize                    | BLZ | 1994 | 53.91 | 50.96 | 56.44 |
| Belize                    | BLZ | 1995 | 53.85 | 51.02 | 56.33 |
| Belize                    | BLZ | 1996 | 53.45 | 50.73 | 55.93 |
| Belize                    | BLZ | 1997 | 53.01 | 50.33 | 55.43 |
| Belize                    | BLZ | 1998 | 52.44 | 49.82 | 54.82 |
| Belize                    | BLZ | 1999 | 52.54 | 49.98 | 54.95 |
| Belize                    | BLZ | 2000 | 53.12 | 50.53 | 55.50 |
| Belize                    | BLZ | 2001 | 54.23 | 51.63 | 56.57 |
| Belize                    | BLZ | 2002 | 55.24 | 52.66 | 57.65 |
| Belize                    | BLZ | 2003 | 55.90 | 53.34 | 58.22 |
| Belize                    | BLZ | 2004 | 56.70 | 54.12 | 59.00 |
| Belize                    | BLZ | 2005 | 57.46 | 54.94 | 59.73 |
| Belize                    | BLZ | 2006 | 58.24 | 55.74 | 60.54 |
| Belize                    | BLZ | 2007 | 59.52 | 57.08 | 61.81 |
| Belize                    | BLZ | 2008 | 60.76 | 58.42 | 62.99 |
| Belize                    | BLZ | 2009 | 61.75 | 59.49 | 63.93 |
| Belize                    | BLZ | 2010 | 62.74 | 60.56 | 64.93 |
| Belize                    | BLZ | 2011 | 63.58 | 61.36 | 65.75 |
| Belize                    | BLZ | 2012 | 64.30 | 62.05 | 66.46 |
| Belize                    | BLZ | 2013 | 64.81 | 62.51 | 66.99 |
| Belize                    | BLZ | 2014 | 65.07 | 62.71 | 67.21 |
| Belize                    | BLZ | 2015 | 65.26 | 62.88 | 67.44 |
| Belize                    | BLZ | 2016 | 65.43 | 62.99 | 67.72 |
| Belize                    | BLZ | 2017 | 65.79 | 63.29 | 68.15 |
| Bermuda                   | BMU | 1990 | 55.68 | 43.34 | 62.91 |
| Bermuda                   | BMU | 1991 | 54.87 | 44.09 | 63.64 |
| Bermuda                   | BMU | 1992 | 53.85 | 44.59 | 63.68 |
| Bermuda                   | BMU | 1993 | 52.78 | 45.02 | 63.72 |
| Bermuda                   | BMU | 1994 | 52.69 | 45.89 | 64.44 |
| Bermuda                   | BMU | 1995 | 54.14 | 47.00 | 65.99 |
| Bermuda                   | BMU | 1996 | 54.73 | 47.42 | 66.56 |
| Bermuda                   | BMU | 1997 | 56.31 | 48.37 | 68.06 |
| Bermuda                   | BMU | 1998 | 57.59 | 49.09 | 69.28 |
| Bermuda                   | BMU | 1999 | 58.93 | 49.69 | 70.43 |
| Bermuda                   | BMU | 2000 | 60.25 | 50.27 | 71.51 |
| Bermuda                   | BMU | 2001 | 60.89 | 51.14 | 72.63 |
| Bermuda                   | BMU | 2002 | 61.51 | 51.71 | 73.45 |
| Bermuda                   | BMU | 2003 | 62.24 | 52.29 | 74.17 |
| Bermuda                   | BMU | 2004 | 62.99 | 52.80 | 74.90 |
| Bermuda                   | BMU | 2005 | 63.68 | 53.33 | 75.51 |
| Bermuda                   | BMU | 2006 | 64.57 | 53.76 | 76.21 |
| Bermuda                   | BMU | 2007 | 65.57 | 54.27 | 77.20 |
| Bermuda                   | BMU | 2008 | 66.54 | 54.72 | 77.98 |
| Bermuda                   | BMU | 2009 | 67.93 | 55.20 | 78.81 |
| Bermuda                   | BMU | 2010 | 69.69 | 55.65 | 79.75 |
| Bermuda                   | BMU | 2011 | 70.13 | 55.98 | 80.16 |
| Bermuda                   | BMU | 2012 | 71.69 | 56.41 | 81.04 |
| Bermuda                   | BMU | 2013 | 71.73 | 56.65 | 81.24 |
| Bermuda                   | BMU | 2014 | 71.64 | 56.93 | 81.46 |
| Bermuda                   | BMU | 2015 | 71.55 | 57.20 | 81.92 |
| Bermuda                   | BMU | 2016 | 71.34 | 57.41 | 82.22 |
| Bermuda                   | BMU | 2017 | 71.47 | 57.55 | 82.50 |
| ivia (Plurinational State | BOL | 1990 | 35.57 | 32.73 | 38.27 |
| ivia (Plurinational State | BOL | 1991 | 36.47 | 33.56 | 39.14 |
| ivia (Plurinational State | BOL | 1992 | 37.68 | 34.91 | 40.35 |
| ivia (Plurinational State | BOL | 1993 | 39.15 | 36.41 | 41.88 |
| ivia (Plurinational State | BOL | 1994 | 40.92 | 38.27 | 43.54 |
| ivia (Plurinational State | BOL | 1995 | 42.54 | 40.07 | 45.18 |
| ivia (Plurinational State | BOL | 1996 | 43.99 | 41.34 | 46.66 |
| ivia (Plurinational State | BOL | 1997 | 44.86 | 42.20 | 47.60 |

|                           |     |      |       |       |       |
|---------------------------|-----|------|-------|-------|-------|
| ivia (Plurinational State | BOL | 1998 | 45.83 | 42.99 | 48.63 |
| ivia (Plurinational State | BOL | 1999 | 47.02 | 44.11 | 49.84 |
| ivia (Plurinational State | BOL | 2000 | 48.51 | 45.58 | 51.41 |
| ivia (Plurinational State | BOL | 2001 | 50.49 | 47.54 | 53.35 |
| ivia (Plurinational State | BOL | 2002 | 51.58 | 48.51 | 54.56 |
| ivia (Plurinational State | BOL | 2003 | 52.80 | 49.53 | 55.71 |
| ivia (Plurinational State | BOL | 2004 | 53.93 | 50.53 | 56.84 |
| ivia (Plurinational State | BOL | 2005 | 54.90 | 51.47 | 57.96 |
| ivia (Plurinational State | BOL | 2006 | 55.98 | 52.48 | 59.23 |
| ivia (Plurinational State | BOL | 2007 | 56.76 | 52.96 | 60.14 |
| ivia (Plurinational State | BOL | 2008 | 57.67 | 53.68 | 61.22 |
| ivia (Plurinational State | BOL | 2009 | 58.44 | 54.12 | 62.21 |
| ivia (Plurinational State | BOL | 2010 | 59.12 | 54.71 | 63.17 |
| ivia (Plurinational State | BOL | 2011 | 59.78 | 55.05 | 63.85 |
| ivia (Plurinational State | BOL | 2012 | 60.45 | 55.39 | 64.74 |
| ivia (Plurinational State | BOL | 2013 | 60.89 | 55.44 | 65.38 |
| ivia (Plurinational State | BOL | 2014 | 61.28 | 55.21 | 66.17 |
| ivia (Plurinational State | BOL | 2015 | 61.61 | 54.70 | 66.82 |
| ivia (Plurinational State | BOL | 2016 | 61.79 | 54.23 | 67.47 |
| ivia (Plurinational State | BOL | 2017 | 62.02 | 53.55 | 68.07 |
| Brazil                    | BRA | 1990 | 48.39 | 46.57 | 49.93 |
| Brazil                    | BRA | 1991 | 49.58 | 47.80 | 51.12 |
| Brazil                    | BRA | 1992 | 50.22 | 48.51 | 51.75 |
| Brazil                    | BRA | 1993 | 50.59 | 48.96 | 52.12 |
| Brazil                    | BRA | 1994 | 51.34 | 49.74 | 52.84 |
| Brazil                    | BRA | 1995 | 52.21 | 50.64 | 53.70 |
| Brazil                    | BRA | 1996 | 53.00 | 51.48 | 54.46 |
| Brazil                    | BRA | 1997 | 53.74 | 52.22 | 55.21 |
| Brazil                    | BRA | 1998 | 54.27 | 52.72 | 55.71 |
| Brazil                    | BRA | 1999 | 54.77 | 53.19 | 56.17 |
| Brazil                    | BRA | 2000 | 56.11 | 54.50 | 57.59 |
| Brazil                    | BRA | 2001 | 56.80 | 55.16 | 58.32 |
| Brazil                    | BRA | 2002 | 57.41 | 55.67 | 58.96 |
| Brazil                    | BRA | 2003 | 57.94 | 56.03 | 59.51 |
| Brazil                    | BRA | 2004 | 58.56 | 56.36 | 60.23 |
| Brazil                    | BRA | 2005 | 59.52 | 57.03 | 61.36 |
| Brazil                    | BRA | 2006 | 60.11 | 57.37 | 62.14 |
| Brazil                    | BRA | 2007 | 60.62 | 57.48 | 62.81 |
| Brazil                    | BRA | 2008 | 61.05 | 57.43 | 63.46 |
| Brazil                    | BRA | 2009 | 61.46 | 57.49 | 64.16 |
| Brazil                    | BRA | 2010 | 61.76 | 57.26 | 64.78 |
| Brazil                    | BRA | 2011 | 61.86 | 56.46 | 65.31 |
| Brazil                    | BRA | 2012 | 62.03 | 55.15 | 65.91 |
| Brazil                    | BRA | 2013 | 62.09 | 52.54 | 66.61 |
| Brazil                    | BRA | 2014 | 62.18 | 46.92 | 67.35 |
| Brazil                    | BRA | 2015 | 62.18 | 46.89 | 67.82 |
| Brazil                    | BRA | 2016 | 61.82 | 46.74 | 68.01 |
| Brazil                    | BRA | 2017 | 61.65 | 46.83 | 68.20 |
| Barbados                  | BRB | 1990 | 63.82 | 60.03 | 66.79 |
| Barbados                  | BRB | 1991 | 63.60 | 59.33 | 66.72 |
| Barbados                  | BRB | 1992 | 63.84 | 59.13 | 67.27 |
| Barbados                  | BRB | 1993 | 64.25 | 59.17 | 67.85 |
| Barbados                  | BRB | 1994 | 64.73 | 59.32 | 68.52 |
| Barbados                  | BRB | 1995 | 65.90 | 60.33 | 69.68 |
| Barbados                  | BRB | 1996 | 66.84 | 61.20 | 70.52 |
| Barbados                  | BRB | 1997 | 67.16 | 61.78 | 70.75 |
| Barbados                  | BRB | 1998 | 68.00 | 62.77 | 71.58 |
| Barbados                  | BRB | 1999 | 68.99 | 63.89 | 72.40 |
| Barbados                  | BRB | 2000 | 69.88 | 65.02 | 73.18 |
| Barbados                  | BRB | 2001 | 71.24 | 66.46 | 74.47 |
| Barbados                  | BRB | 2002 | 71.71 | 67.17 | 74.91 |
| Barbados                  | BRB | 2003 | 72.38 | 68.16 | 75.43 |



|                   |     |      |       |       |       |
|-------------------|-----|------|-------|-------|-------|
| Barbados          | BRB | 2004 | 73.02 | 68.99 | 75.99 |
| Barbados          | BRB | 2005 | 73.68 | 70.01 | 76.50 |
| Barbados          | BRB | 2006 | 74.49 | 71.20 | 77.22 |
| Barbados          | BRB | 2007 | 75.23 | 72.16 | 77.88 |
| Barbados          | BRB | 2008 | 76.08 | 73.11 | 78.53 |
| Barbados          | BRB | 2009 | 76.92 | 74.08 | 79.25 |
| Barbados          | BRB | 2010 | 77.55 | 74.84 | 79.78 |
| Barbados          | BRB | 2011 | 77.90 | 75.25 | 80.08 |
| Barbados          | BRB | 2012 | 78.54 | 75.94 | 80.69 |
| Barbados          | BRB | 2013 | 78.75 | 76.16 | 80.94 |
| Barbados          | BRB | 2014 | 78.80 | 76.09 | 81.09 |
| Barbados          | BRB | 2015 | 79.01 | 76.16 | 81.44 |
| Barbados          | BRB | 2016 | 79.25 | 76.24 | 81.80 |
| Barbados          | BRB | 2017 | 79.42 | 76.18 | 82.15 |
| Brunei Darussalam | BRN | 1990 | 53.73 | 51.27 | 55.83 |
| Brunei Darussalam | BRN | 1991 | 54.94 | 52.60 | 56.99 |
| Brunei Darussalam | BRN | 1992 | 56.26 | 53.96 | 58.28 |
| Brunei Darussalam | BRN | 1993 | 57.58 | 55.23 | 59.66 |
| Brunei Darussalam | BRN | 1994 | 58.82 | 56.53 | 60.89 |
| Brunei Darussalam | BRN | 1995 | 60.09 | 57.82 | 62.14 |
| Brunei Darussalam | BRN | 1996 | 61.85 | 59.60 | 63.83 |
| Brunei Darussalam | BRN | 1997 | 63.15 | 60.84 | 65.18 |
| Brunei Darussalam | BRN | 1998 | 64.10 | 61.79 | 66.18 |
| Brunei Darussalam | BRN | 1999 | 64.88 | 62.63 | 66.97 |
| Brunei Darussalam | BRN | 2000 | 65.46 | 63.25 | 67.57 |
| Brunei Darussalam | BRN | 2001 | 66.12 | 63.87 | 68.22 |
| Brunei Darussalam | BRN | 2002 | 66.65 | 64.26 | 68.85 |
| Brunei Darussalam | BRN | 2003 | 67.06 | 64.62 | 69.29 |
| Brunei Darussalam | BRN | 2004 | 67.47 | 64.93 | 69.80 |
| Brunei Darussalam | BRN | 2005 | 67.96 | 65.35 | 70.31 |
| Brunei Darussalam | BRN | 2006 | 68.35 | 65.54 | 70.75 |
| Brunei Darussalam | BRN | 2007 | 68.70 | 65.73 | 71.17 |
| Brunei Darussalam | BRN | 2008 | 69.15 | 66.11 | 71.69 |
| Brunei Darussalam | BRN | 2009 | 69.52 | 66.24 | 72.15 |
| Brunei Darussalam | BRN | 2010 | 69.91 | 66.52 | 72.59 |
| Brunei Darussalam | BRN | 2011 | 69.94 | 66.34 | 72.65 |
| Brunei Darussalam | BRN | 2012 | 70.15 | 66.62 | 72.98 |
| Brunei Darussalam | BRN | 2013 | 70.55 | 66.82 | 73.43 |
| Brunei Darussalam | BRN | 2014 | 70.98 | 67.25 | 73.92 |
| Brunei Darussalam | BRN | 2015 | 71.48 | 67.54 | 74.51 |
| Brunei Darussalam | BRN | 2016 | 71.82 | 67.75 | 75.00 |
| Brunei Darussalam | BRN | 2017 | 72.34 | 68.07 | 75.55 |
| Bhutan            | BTN | 1990 | 17.55 | 15.42 | 19.54 |
| Bhutan            | BTN | 1991 | 18.02 | 15.91 | 19.89 |
| Bhutan            | BTN | 1992 | 18.21 | 16.14 | 19.97 |
| Bhutan            | BTN | 1993 | 18.63 | 16.70 | 20.38 |
| Bhutan            | BTN | 1994 | 19.17 | 17.24 | 20.92 |
| Bhutan            | BTN | 1995 | 19.80 | 17.89 | 21.50 |
| Bhutan            | BTN | 1996 | 20.59 | 18.81 | 22.22 |
| Bhutan            | BTN | 1997 | 21.32 | 19.50 | 22.92 |
| Bhutan            | BTN | 1998 | 21.92 | 20.12 | 23.48 |
| Bhutan            | BTN | 1999 | 22.53 | 20.88 | 24.03 |
| Bhutan            | BTN | 2000 | 23.01 | 21.31 | 24.52 |
| Bhutan            | BTN | 2001 | 24.30 | 22.25 | 27.31 |
| Bhutan            | BTN | 2002 | 27.16 | 23.91 | 30.28 |
| Bhutan            | BTN | 2003 | 29.98 | 27.06 | 32.80 |
| Bhutan            | BTN | 2004 | 32.68 | 30.05 | 35.40 |
| Bhutan            | BTN | 2005 | 34.82 | 32.33 | 37.46 |
| Bhutan            | BTN | 2006 | 36.75 | 34.24 | 39.37 |
| Bhutan            | BTN | 2007 | 38.80 | 36.23 | 41.40 |
| Bhutan            | BTN | 2008 | 40.57 | 37.88 | 43.19 |
| Bhutan            | BTN | 2009 | 42.16 | 39.37 | 44.92 |

|                          |     |      |       |       |       |
|--------------------------|-----|------|-------|-------|-------|
| Bhutan                   | BTN | 2010 | 43.62 | 40.74 | 46.38 |
| Bhutan                   | BTN | 2011 | 45.12 | 42.23 | 47.89 |
| Bhutan                   | BTN | 2012 | 46.55 | 43.58 | 49.53 |
| Bhutan                   | BTN | 2013 | 47.99 | 44.92 | 51.04 |
| Bhutan                   | BTN | 2014 | 49.42 | 46.31 | 52.56 |
| Bhutan                   | BTN | 2015 | 50.81 | 47.64 | 54.19 |
| Bhutan                   | BTN | 2016 | 52.11 | 48.87 | 55.52 |
| Bhutan                   | BTN | 2017 | 53.36 | 50.04 | 56.76 |
| Botswana                 | BWA | 1990 | 36.17 | 31.67 | 39.81 |
| Botswana                 | BWA | 1991 | 37.29 | 32.71 | 40.90 |
| Botswana                 | BWA | 1992 | 38.42 | 34.06 | 42.13 |
| Botswana                 | BWA | 1993 | 39.60 | 35.07 | 43.27 |
| Botswana                 | BWA | 1994 | 40.85 | 36.41 | 44.61 |
| Botswana                 | BWA | 1995 | 42.11 | 37.73 | 45.94 |
| Botswana                 | BWA | 1996 | 43.61 | 39.21 | 47.38 |
| Botswana                 | BWA | 1997 | 45.19 | 40.95 | 49.03 |
| Botswana                 | BWA | 1998 | 46.37 | 42.34 | 50.27 |
| Botswana                 | BWA | 1999 | 47.40 | 43.40 | 51.40 |
| Botswana                 | BWA | 2000 | 48.04 | 44.02 | 51.98 |
| Botswana                 | BWA | 2001 | 48.46 | 44.32 | 52.46 |
| Botswana                 | BWA | 2002 | 48.72 | 44.69 | 52.71 |
| Botswana                 | BWA | 2003 | 48.93 | 44.84 | 52.86 |
| Botswana                 | BWA | 2004 | 49.45 | 45.54 | 53.17 |
| Botswana                 | BWA | 2005 | 50.34 | 46.69 | 53.75 |
| Botswana                 | BWA | 2006 | 51.40 | 48.09 | 54.74 |
| Botswana                 | BWA | 2007 | 52.73 | 49.34 | 56.11 |
| Botswana                 | BWA | 2008 | 52.82 | 49.40 | 56.27 |
| Botswana                 | BWA | 2009 | 53.26 | 49.88 | 56.73 |
| Botswana                 | BWA | 2010 | 54.18 | 50.85 | 57.51 |
| Botswana                 | BWA | 2011 | 55.02 | 51.42 | 58.48 |
| Botswana                 | BWA | 2012 | 56.09 | 52.62 | 59.55 |
| Botswana                 | BWA | 2013 | 56.88 | 53.29 | 60.30 |
| Botswana                 | BWA | 2014 | 57.59 | 53.92 | 60.95 |
| Botswana                 | BWA | 2015 | 58.15 | 54.33 | 61.64 |
| Botswana                 | BWA | 2016 | 59.05 | 55.15 | 62.53 |
| Botswana                 | BWA | 2017 | 59.94 | 55.92 | 63.60 |
| Central African Republic | CAF | 1990 | 7.63  | 4.44  | 12.56 |
| Central African Republic | CAF | 1991 | 7.85  | 4.42  | 12.76 |
| Central African Republic | CAF | 1992 | 7.49  | 4.49  | 11.78 |
| Central African Republic | CAF | 1993 | 6.93  | 4.25  | 10.82 |
| Central African Republic | CAF | 1994 | 7.01  | 4.27  | 10.49 |
| Central African Republic | CAF | 1995 | 7.34  | 4.40  | 10.88 |
| Central African Republic | CAF | 1996 | 7.25  | 4.26  | 10.66 |
| Central African Republic | CAF | 1997 | 7.56  | 4.40  | 11.08 |
| Central African Republic | CAF | 1998 | 7.75  | 4.41  | 11.15 |
| Central African Republic | CAF | 1999 | 7.93  | 4.48  | 11.34 |
| Central African Republic | CAF | 2000 | 8.28  | 4.81  | 12.10 |
| Central African Republic | CAF | 2001 | 8.76  | 5.09  | 13.48 |
| Central African Republic | CAF | 2002 | 9.55  | 5.20  | 15.62 |
| Central African Republic | CAF | 2003 | 11.14 | 5.52  | 17.49 |
| Central African Republic | CAF | 2004 | 12.50 | 6.21  | 18.85 |
| Central African Republic | CAF | 2005 | 13.98 | 7.44  | 20.29 |
| Central African Republic | CAF | 2006 | 14.89 | 8.17  | 21.37 |
| Central African Republic | CAF | 2007 | 15.60 | 8.60  | 22.16 |
| Central African Republic | CAF | 2008 | 16.79 | 9.55  | 23.16 |
| Central African Republic | CAF | 2009 | 16.98 | 9.64  | 23.73 |
| Central African Republic | CAF | 2010 | 17.37 | 9.74  | 24.32 |
| Central African Republic | CAF | 2011 | 18.43 | 10.46 | 25.29 |
| Central African Republic | CAF | 2012 | 19.40 | 10.89 | 26.57 |
| Central African Republic | CAF | 2013 | 16.10 | 8.40  | 23.89 |
| Central African Republic | CAF | 2014 | 16.59 | 9.15  | 24.35 |
| Central African Republic | CAF | 2015 | 18.81 | 10.56 | 26.15 |

|                          |     |      |       |       |       |
|--------------------------|-----|------|-------|-------|-------|
| Central African Republic | CAF | 2016 | 20.48 | 11.94 | 27.32 |
| Central African Republic | CAF | 2017 | 20.30 | 11.75 | 27.30 |
| Canada                   | CAN | 1990 | 81.77 | 79.38 | 83.70 |
| Canada                   | CAN | 1991 | 82.49 | 80.08 | 84.39 |
| Canada                   | CAN | 1992 | 83.06 | 80.57 | 85.01 |
| Canada                   | CAN | 1993 | 83.37 | 80.82 | 85.38 |
| Canada                   | CAN | 1994 | 83.86 | 81.23 | 85.81 |
| Canada                   | CAN | 1995 | 84.14 | 81.35 | 86.15 |
| Canada                   | CAN | 1996 | 85.18 | 82.16 | 87.33 |
| Canada                   | CAN | 1997 | 85.70 | 82.54 | 87.84 |
| Canada                   | CAN | 1998 | 86.10 | 82.84 | 88.29 |
| Canada                   | CAN | 1999 | 86.42 | 83.12 | 88.73 |
| Canada                   | CAN | 2000 | 86.86 | 83.49 | 89.28 |
| Canada                   | CAN | 2001 | 87.21 | 83.77 | 89.66 |
| Canada                   | CAN | 2002 | 87.44 | 83.76 | 90.00 |
| Canada                   | CAN | 2003 | 87.19 | 82.97 | 90.12 |
| Canada                   | CAN | 2004 | 87.30 | 82.70 | 90.44 |
| Canada                   | CAN | 2005 | 87.28 | 82.47 | 90.59 |
| Canada                   | CAN | 2006 | 87.64 | 82.49 | 91.06 |
| Canada                   | CAN | 2007 | 87.63 | 82.05 | 91.21 |
| Canada                   | CAN | 2008 | 87.71 | 81.66 | 91.54 |
| Canada                   | CAN | 2009 | 88.22 | 81.96 | 92.15 |
| Canada                   | CAN | 2010 | 88.92 | 82.80 | 92.95 |
| Canada                   | CAN | 2011 | 89.02 | 82.27 | 93.34 |
| Canada                   | CAN | 2012 | 88.85 | 82.18 | 93.24 |
| Canada                   | CAN | 2013 | 88.98 | 82.05 | 93.38 |
| Canada                   | CAN | 2014 | 88.59 | 81.70 | 93.09 |
| Canada                   | CAN | 2015 | 88.33 | 81.11 | 92.90 |
| Canada                   | CAN | 2016 | 88.44 | 81.06 | 93.07 |
| Canada                   | CAN | 2017 | 88.29 | 80.67 | 93.07 |
| Switzerland              | CHE | 1990 | 85.39 | 80.68 | 88.58 |
| Switzerland              | CHE | 1991 | 85.31 | 80.54 | 88.53 |
| Switzerland              | CHE | 1992 | 85.73 | 80.94 | 88.97 |
| Switzerland              | CHE | 1993 | 86.10 | 81.09 | 89.52 |
| Switzerland              | CHE | 1994 | 86.12 | 80.86 | 89.56 |
| Switzerland              | CHE | 1995 | 86.22 | 80.81 | 89.85 |
| Switzerland              | CHE | 1996 | 87.58 | 82.10 | 91.24 |
| Switzerland              | CHE | 1997 | 87.56 | 82.08 | 91.37 |
| Switzerland              | CHE | 1998 | 87.81 | 82.15 | 91.76 |
| Switzerland              | CHE | 1999 | 88.22 | 82.20 | 92.15 |
| Switzerland              | CHE | 2000 | 88.02 | 81.93 | 91.97 |
| Switzerland              | CHE | 2001 | 88.54 | 82.25 | 92.50 |
| Switzerland              | CHE | 2002 | 88.82 | 81.77 | 92.87 |
| Switzerland              | CHE | 2003 | 89.06 | 81.94 | 93.18 |
| Switzerland              | CHE | 2004 | 89.47 | 81.92 | 93.69 |
| Switzerland              | CHE | 2005 | 89.64 | 81.76 | 93.90 |
| Switzerland              | CHE | 2006 | 89.50 | 81.39 | 93.86 |
| Switzerland              | CHE | 2007 | 89.46 | 81.33 | 93.89 |
| Switzerland              | CHE | 2008 | 89.36 | 80.97 | 93.85 |
| Switzerland              | CHE | 2009 | 89.07 | 79.93 | 93.80 |
| Switzerland              | CHE | 2010 | 89.04 | 80.24 | 93.74 |
| Switzerland              | CHE | 2011 | 89.24 | 80.62 | 93.80 |
| Switzerland              | CHE | 2012 | 89.08 | 79.80 | 93.67 |
| Switzerland              | CHE | 2013 | 88.94 | 79.98 | 93.64 |
| Switzerland              | CHE | 2014 | 88.77 | 79.05 | 93.52 |
| Switzerland              | CHE | 2015 | 88.61 | 78.65 | 93.49 |
| Switzerland              | CHE | 2016 | 88.49 | 78.54 | 93.45 |
| Switzerland              | CHE | 2017 | 88.41 | 78.01 | 93.41 |
| Chile                    | CHL | 1990 | 62.59 | 60.80 | 64.15 |
| Chile                    | CHL | 1991 | 64.97 | 63.24 | 66.42 |
| Chile                    | CHL | 1992 | 66.59 | 65.02 | 68.03 |
| Chile                    | CHL | 1993 | 66.98 | 65.48 | 68.41 |

|               |     |      |       |       |       |
|---------------|-----|------|-------|-------|-------|
| Chile         | CHL | 1994 | 67.34 | 65.90 | 68.71 |
| Chile         | CHL | 1995 | 68.24 | 66.80 | 69.60 |
| Chile         | CHL | 1996 | 69.08 | 67.58 | 70.42 |
| Chile         | CHL | 1997 | 70.09 | 68.54 | 71.46 |
| Chile         | CHL | 1998 | 70.67 | 69.11 | 72.11 |
| Chile         | CHL | 1999 | 71.11 | 69.36 | 72.66 |
| Chile         | CHL | 2000 | 71.75 | 69.86 | 73.38 |
| Chile         | CHL | 2001 | 71.37 | 69.31 | 73.04 |
| Chile         | CHL | 2002 | 72.08 | 69.81 | 73.85 |
| Chile         | CHL | 2003 | 72.16 | 69.70 | 73.97 |
| Chile         | CHL | 2004 | 72.67 | 70.04 | 74.53 |
| Chile         | CHL | 2005 | 73.37 | 70.61 | 75.43 |
| Chile         | CHL | 2006 | 74.03 | 71.20 | 76.08 |
| Chile         | CHL | 2007 | 74.55 | 71.66 | 76.69 |
| Chile         | CHL | 2008 | 75.44 | 72.43 | 77.62 |
| Chile         | CHL | 2009 | 75.19 | 71.89 | 77.48 |
| Chile         | CHL | 2010 | 75.84 | 72.30 | 78.23 |
| Chile         | CHL | 2011 | 76.54 | 72.67 | 79.13 |
| Chile         | CHL | 2012 | 77.27 | 73.30 | 79.92 |
| Chile         | CHL | 2013 | 77.75 | 73.74 | 80.53 |
| Chile         | CHL | 2014 | 78.36 | 74.22 | 81.18 |
| Chile         | CHL | 2015 | 78.71 | 74.56 | 81.72 |
| Chile         | CHL | 2016 | 78.94 | 74.52 | 82.14 |
| Chile         | CHL | 2017 | 79.16 | 74.47 | 82.59 |
| China         | CHN | 1990 | 48.24 | 45.94 | 50.28 |
| China         | CHN | 1991 | 49.30 | 47.00 | 51.25 |
| China         | CHN | 1992 | 50.48 | 48.28 | 52.39 |
| China         | CHN | 1993 | 51.74 | 49.58 | 53.59 |
| China         | CHN | 1994 | 53.12 | 51.07 | 54.90 |
| China         | CHN | 1995 | 54.41 | 52.47 | 56.24 |
| China         | CHN | 1996 | 55.71 | 53.76 | 57.49 |
| China         | CHN | 1997 | 57.16 | 55.29 | 58.86 |
| China         | CHN | 1998 | 58.51 | 56.75 | 60.20 |
| China         | CHN | 1999 | 59.75 | 58.00 | 61.37 |
| China         | CHN | 2000 | 60.93 | 59.25 | 62.59 |
| China         | CHN | 2001 | 62.27 | 60.64 | 63.90 |
| China         | CHN | 2002 | 64.06 | 62.48 | 65.67 |
| China         | CHN | 2003 | 65.32 | 63.76 | 66.83 |
| China         | CHN | 2004 | 66.52 | 64.99 | 68.00 |
| China         | CHN | 2005 | 68.06 | 66.56 | 69.53 |
| China         | CHN | 2006 | 69.98 | 68.49 | 71.39 |
| China         | CHN | 2007 | 71.47 | 70.08 | 72.86 |
| China         | CHN | 2008 | 72.43 | 70.98 | 73.75 |
| China         | CHN | 2009 | 73.23 | 71.80 | 74.46 |
| China         | CHN | 2010 | 73.86 | 72.48 | 75.05 |
| China         | CHN | 2011 | 74.34 | 73.10 | 75.50 |
| China         | CHN | 2012 | 74.74 | 73.47 | 75.85 |
| China         | CHN | 2013 | 75.13 | 73.88 | 76.23 |
| China         | CHN | 2014 | 75.13 | 73.83 | 76.26 |
| China         | CHN | 2015 | 75.00 | 73.67 | 76.16 |
| China         | CHN | 2016 | 75.49 | 74.06 | 76.65 |
| China         | CHN | 2017 | 76.80 | 75.37 | 78.01 |
| Côte d'Ivoire | CIV | 1990 | 23.52 | 20.17 | 26.38 |
| Côte d'Ivoire | CIV | 1991 | 24.49 | 21.25 | 27.35 |
| Côte d'Ivoire | CIV | 1992 | 25.21 | 22.05 | 28.01 |
| Côte d'Ivoire | CIV | 1993 | 25.63 | 22.62 | 28.34 |
| Côte d'Ivoire | CIV | 1994 | 26.06 | 23.14 | 28.82 |
| Côte d'Ivoire | CIV | 1995 | 26.48 | 23.51 | 29.17 |
| Côte d'Ivoire | CIV | 1996 | 27.12 | 24.15 | 29.83 |
| Côte d'Ivoire | CIV | 1997 | 27.89 | 25.07 | 30.63 |
| Côte d'Ivoire | CIV | 1998 | 28.50 | 25.69 | 31.21 |
| Côte d'Ivoire | CIV | 1999 | 29.07 | 26.09 | 31.80 |

|                              |     |      |       |       |       |
|------------------------------|-----|------|-------|-------|-------|
| Côte d'Ivoire                | CIV | 2000 | 30.07 | 27.08 | 32.86 |
| Côte d'Ivoire                | CIV | 2001 | 30.98 | 27.90 | 33.82 |
| Côte d'Ivoire                | CIV | 2002 | 31.78 | 28.57 | 34.76 |
| Côte d'Ivoire                | CIV | 2003 | 32.30 | 28.92 | 35.27 |
| Côte d'Ivoire                | CIV | 2004 | 32.85 | 29.55 | 35.76 |
| Côte d'Ivoire                | CIV | 2005 | 33.37 | 30.05 | 36.26 |
| Côte d'Ivoire                | CIV | 2006 | 34.13 | 30.81 | 37.13 |
| Côte d'Ivoire                | CIV | 2007 | 34.95 | 31.58 | 37.99 |
| Côte d'Ivoire                | CIV | 2008 | 35.94 | 32.49 | 39.10 |
| Côte d'Ivoire                | CIV | 2009 | 36.97 | 33.50 | 40.08 |
| Côte d'Ivoire                | CIV | 2010 | 37.86 | 34.44 | 41.05 |
| Côte d'Ivoire                | CIV | 2011 | 38.31 | 35.00 | 41.39 |
| Côte d'Ivoire                | CIV | 2012 | 39.10 | 35.75 | 42.21 |
| Côte d'Ivoire                | CIV | 2013 | 39.77 | 36.43 | 42.93 |
| Côte d'Ivoire                | CIV | 2014 | 40.49 | 37.13 | 43.71 |
| Côte d'Ivoire                | CIV | 2015 | 41.59 | 38.24 | 44.90 |
| Côte d'Ivoire                | CIV | 2016 | 42.74 | 39.36 | 46.19 |
| Côte d'Ivoire                | CIV | 2017 | 43.73 | 40.29 | 47.25 |
| Cameroon                     | CMR | 1990 | 33.34 | 30.52 | 36.10 |
| Cameroon                     | CMR | 1991 | 33.54 | 30.74 | 36.32 |
| Cameroon                     | CMR | 1992 | 33.74 | 30.82 | 36.55 |
| Cameroon                     | CMR | 1993 | 33.78 | 30.97 | 36.75 |
| Cameroon                     | CMR | 1994 | 33.97 | 31.17 | 36.88 |
| Cameroon                     | CMR | 1995 | 34.38 | 31.55 | 37.23 |
| Cameroon                     | CMR | 1996 | 34.64 | 31.75 | 37.63 |
| Cameroon                     | CMR | 1997 | 34.83 | 31.85 | 37.80 |
| Cameroon                     | CMR | 1998 | 35.12 | 32.09 | 38.21 |
| Cameroon                     | CMR | 1999 | 35.65 | 32.77 | 38.63 |
| Cameroon                     | CMR | 2000 | 36.12 | 33.12 | 39.35 |
| Cameroon                     | CMR | 2001 | 37.08 | 34.08 | 40.19 |
| Cameroon                     | CMR | 2002 | 38.61 | 35.43 | 41.90 |
| Cameroon                     | CMR | 2003 | 39.87 | 36.60 | 43.20 |
| Cameroon                     | CMR | 2004 | 40.75 | 37.52 | 44.17 |
| Cameroon                     | CMR | 2005 | 41.41 | 38.05 | 44.84 |
| Cameroon                     | CMR | 2006 | 41.93 | 38.55 | 45.40 |
| Cameroon                     | CMR | 2007 | 42.62 | 39.24 | 46.13 |
| Cameroon                     | CMR | 2008 | 43.45 | 39.92 | 47.16 |
| Cameroon                     | CMR | 2009 | 44.34 | 40.66 | 48.04 |
| Cameroon                     | CMR | 2010 | 45.46 | 41.73 | 49.30 |
| Cameroon                     | CMR | 2011 | 46.60 | 42.75 | 50.56 |
| Cameroon                     | CMR | 2012 | 47.55 | 43.62 | 51.56 |
| Cameroon                     | CMR | 2013 | 48.61 | 44.53 | 52.79 |
| Cameroon                     | CMR | 2014 | 49.62 | 45.56 | 53.90 |
| Cameroon                     | CMR | 2015 | 50.48 | 46.14 | 54.81 |
| Cameroon                     | CMR | 2016 | 51.55 | 47.04 | 56.03 |
| Cameroon                     | CMR | 2017 | 52.58 | 48.12 | 57.12 |
| Democratic Republic of the C | COD | 1990 | 19.33 | 10.94 | 26.75 |
| Democratic Republic of the C | COD | 1991 | 18.38 | 10.17 | 25.68 |
| Democratic Republic of the C | COD | 1992 | 18.78 | 10.19 | 25.71 |
| Democratic Republic of the C | COD | 1993 | 18.90 | 10.38 | 26.06 |
| Democratic Republic of the C | COD | 1994 | 18.74 | 10.54 | 25.88 |
| Democratic Republic of the C | COD | 1995 | 18.17 | 9.81  | 25.20 |
| Democratic Republic of the C | COD | 1996 | 14.95 | 9.21  | 21.94 |
| Democratic Republic of the C | COD | 1997 | 15.40 | 9.27  | 22.39 |
| Democratic Republic of the C | COD | 1998 | 16.63 | 9.31  | 24.18 |
| Democratic Republic of the C | COD | 1999 | 16.80 | 9.37  | 24.20 |
| Democratic Republic of the C | COD | 2000 | 17.13 | 11.45 | 25.01 |
| Democratic Republic of the C | COD | 2001 | 17.80 | 12.09 | 25.44 |
| Democratic Republic of the C | COD | 2002 | 18.84 | 13.43 | 26.68 |
| Democratic Republic of the C | COD | 2003 | 20.25 | 14.33 | 28.10 |
| Democratic Republic of the C | COD | 2004 | 21.57 | 15.43 | 29.66 |
| Democratic Republic of the C | COD | 2005 | 23.03 | 16.21 | 31.06 |

|                              |     |      |       |       |       |
|------------------------------|-----|------|-------|-------|-------|
| Democratic Republic of the C | COD | 2006 | 23.12 | 16.51 | 31.54 |
| Democratic Republic of the C | COD | 2007 | 23.32 | 16.80 | 32.00 |
| Democratic Republic of the C | COD | 2008 | 24.80 | 16.97 | 32.92 |
| Democratic Republic of the C | COD | 2009 | 25.20 | 17.05 | 33.14 |
| Democratic Republic of the C | COD | 2010 | 25.94 | 17.51 | 33.99 |
| Democratic Republic of the C | COD | 2011 | 27.46 | 17.90 | 34.88 |
| Democratic Republic of the C | COD | 2012 | 29.61 | 18.52 | 36.09 |
| Democratic Republic of the C | COD | 2013 | 31.60 | 19.15 | 37.36 |
| Democratic Republic of the C | COD | 2014 | 33.52 | 19.98 | 38.89 |
| Democratic Republic of the C | COD | 2015 | 35.13 | 25.69 | 40.25 |
| Democratic Republic of the C | COD | 2016 | 36.16 | 28.27 | 41.23 |
| Democratic Republic of the C | COD | 2017 | 37.25 | 30.83 | 42.26 |
| Congo                        | COG | 1990 | 24.81 | 19.61 | 29.30 |
| Congo                        | COG | 1991 | 25.68 | 20.38 | 30.21 |
| Congo                        | COG | 1992 | 26.31 | 21.16 | 30.69 |
| Congo                        | COG | 1993 | 26.01 | 20.83 | 30.49 |
| Congo                        | COG | 1994 | 24.78 | 18.71 | 29.43 |
| Congo                        | COG | 1995 | 24.30 | 17.98 | 29.14 |
| Congo                        | COG | 1996 | 24.19 | 17.09 | 29.04 |
| Congo                        | COG | 1997 | 18.29 | 11.66 | 24.28 |
| Congo                        | COG | 1998 | 21.54 | 14.47 | 26.95 |
| Congo                        | COG | 1999 | 23.08 | 17.11 | 28.17 |
| Congo                        | COG | 2000 | 25.85 | 20.76 | 30.36 |
| Congo                        | COG | 2001 | 29.33 | 25.07 | 33.57 |
| Congo                        | COG | 2002 | 32.04 | 27.94 | 36.09 |
| Congo                        | COG | 2003 | 33.46 | 29.41 | 37.48 |
| Congo                        | COG | 2004 | 34.83 | 31.09 | 38.75 |
| Congo                        | COG | 2005 | 36.24 | 32.38 | 40.15 |
| Congo                        | COG | 2006 | 37.65 | 33.89 | 41.41 |
| Congo                        | COG | 2007 | 38.51 | 34.53 | 42.28 |
| Congo                        | COG | 2008 | 39.61 | 35.60 | 43.38 |
| Congo                        | COG | 2009 | 40.70 | 36.70 | 44.49 |
| Congo                        | COG | 2010 | 42.15 | 37.97 | 45.95 |
| Congo                        | COG | 2011 | 43.37 | 39.21 | 47.24 |
| Congo                        | COG | 2012 | 44.24 | 39.96 | 48.09 |
| Congo                        | COG | 2013 | 44.89 | 40.56 | 48.93 |
| Congo                        | COG | 2014 | 45.75 | 41.57 | 49.84 |
| Congo                        | COG | 2015 | 46.76 | 42.59 | 50.95 |
| Congo                        | COG | 2016 | 47.22 | 42.94 | 51.51 |
| Congo                        | COG | 2017 | 47.75 | 43.27 | 52.20 |
| Colombia                     | COL | 1990 | 53.00 | 50.31 | 55.32 |
| Colombia                     | COL | 1991 | 53.07 | 50.38 | 55.37 |
| Colombia                     | COL | 1992 | 53.72 | 51.00 | 56.06 |
| Colombia                     | COL | 1993 | 55.05 | 52.31 | 57.31 |
| Colombia                     | COL | 1994 | 55.92 | 53.13 | 58.22 |
| Colombia                     | COL | 1995 | 57.07 | 54.33 | 59.33 |
| Colombia                     | COL | 1996 | 58.01 | 55.28 | 60.18 |
| Colombia                     | COL | 1997 | 59.56 | 56.78 | 61.76 |
| Colombia                     | COL | 1998 | 60.62 | 57.91 | 62.88 |
| Colombia                     | COL | 1999 | 61.35 | 58.76 | 63.70 |
| Colombia                     | COL | 2000 | 62.54 | 59.98 | 64.89 |
| Colombia                     | COL | 2001 | 63.61 | 60.93 | 65.97 |
| Colombia                     | COL | 2002 | 63.29 | 60.68 | 65.63 |
| Colombia                     | COL | 2003 | 65.10 | 62.38 | 67.46 |
| Colombia                     | COL | 2004 | 66.24 | 63.53 | 68.64 |
| Colombia                     | COL | 2005 | 67.47 | 64.78 | 69.85 |
| Colombia                     | COL | 2006 | 68.36 | 65.78 | 70.72 |
| Colombia                     | COL | 2007 | 69.60 | 67.03 | 71.96 |
| Colombia                     | COL | 2008 | 70.67 | 68.16 | 73.01 |
| Colombia                     | COL | 2009 | 71.37 | 68.91 | 73.71 |
| Colombia                     | COL | 2010 | 72.55 | 70.06 | 74.91 |
| Colombia                     | COL | 2011 | 73.95 | 71.36 | 76.35 |

|            |     |      |       |       |       |
|------------|-----|------|-------|-------|-------|
| Colombia   | COL | 2012 | 74.74 | 72.09 | 77.13 |
| Colombia   | COL | 2013 | 75.49 | 72.87 | 77.95 |
| Colombia   | COL | 2014 | 76.02 | 73.52 | 78.43 |
| Colombia   | COL | 2015 | 76.34 | 73.86 | 78.78 |
| Colombia   | COL | 2016 | 76.70 | 74.20 | 79.09 |
| Colombia   | COL | 2017 | 77.02 | 74.48 | 79.59 |
| Comoros    | COM | 1990 | 13.78 | 7.58  | 17.74 |
| Comoros    | COM | 1991 | 14.23 | 7.93  | 18.27 |
| Comoros    | COM | 1992 | 14.77 | 8.58  | 18.90 |
| Comoros    | COM | 1993 | 15.79 | 9.89  | 19.82 |
| Comoros    | COM | 1994 | 16.54 | 11.03 | 20.53 |
| Comoros    | COM | 1995 | 17.43 | 11.86 | 21.37 |
| Comoros    | COM | 1996 | 18.13 | 13.32 | 22.00 |
| Comoros    | COM | 1997 | 18.50 | 13.32 | 22.31 |
| Comoros    | COM | 1998 | 20.26 | 16.24 | 23.79 |
| Comoros    | COM | 1999 | 21.53 | 17.66 | 24.97 |
| Comoros    | COM | 2000 | 22.21 | 17.19 | 25.92 |
| Comoros    | COM | 2001 | 23.90 | 19.22 | 27.39 |
| Comoros    | COM | 2002 | 25.51 | 21.13 | 29.09 |
| Comoros    | COM | 2003 | 27.04 | 22.82 | 30.70 |
| Comoros    | COM | 2004 | 28.33 | 24.24 | 31.86 |
| Comoros    | COM | 2005 | 30.75 | 26.79 | 34.30 |
| Comoros    | COM | 2006 | 32.14 | 28.24 | 35.78 |
| Comoros    | COM | 2007 | 33.65 | 29.84 | 37.24 |
| Comoros    | COM | 2008 | 35.18 | 31.43 | 38.73 |
| Comoros    | COM | 2009 | 36.41 | 32.58 | 39.89 |
| Comoros    | COM | 2010 | 37.71 | 33.87 | 41.15 |
| Comoros    | COM | 2011 | 38.84 | 35.03 | 42.27 |
| Comoros    | COM | 2012 | 40.02 | 36.38 | 43.50 |
| Comoros    | COM | 2013 | 41.20 | 37.43 | 44.73 |
| Comoros    | COM | 2014 | 42.21 | 38.41 | 45.75 |
| Comoros    | COM | 2015 | 43.10 | 39.14 | 46.84 |
| Comoros    | COM | 2016 | 44.04 | 39.80 | 47.97 |
| Comoros    | COM | 2017 | 44.89 | 40.43 | 48.95 |
| Cabo Verde | CPV | 1990 | 28.20 | 23.44 | 31.17 |
| Cabo Verde | CPV | 1991 | 29.67 | 25.32 | 32.62 |
| Cabo Verde | CPV | 1992 | 31.03 | 27.04 | 33.89 |
| Cabo Verde | CPV | 1993 | 32.23 | 28.46 | 35.00 |
| Cabo Verde | CPV | 1994 | 33.29 | 29.77 | 36.04 |
| Cabo Verde | CPV | 1995 | 34.31 | 30.99 | 37.05 |
| Cabo Verde | CPV | 1996 | 35.49 | 32.32 | 38.20 |
| Cabo Verde | CPV | 1997 | 36.77 | 33.71 | 39.56 |
| Cabo Verde | CPV | 1998 | 37.99 | 34.94 | 40.75 |
| Cabo Verde | CPV | 1999 | 39.07 | 36.07 | 41.95 |
| Cabo Verde | CPV | 2000 | 40.33 | 37.44 | 43.12 |
| Cabo Verde | CPV | 2001 | 41.50 | 38.64 | 44.37 |
| Cabo Verde | CPV | 2002 | 42.61 | 39.81 | 45.47 |
| Cabo Verde | CPV | 2003 | 43.73 | 40.95 | 46.53 |
| Cabo Verde | CPV | 2004 | 44.89 | 42.11 | 47.69 |
| Cabo Verde | CPV | 2005 | 46.06 | 43.31 | 48.81 |
| Cabo Verde | CPV | 2006 | 47.10 | 44.18 | 49.75 |
| Cabo Verde | CPV | 2007 | 48.43 | 45.59 | 51.11 |
| Cabo Verde | CPV | 2008 | 49.60 | 46.67 | 52.21 |
| Cabo Verde | CPV | 2009 | 50.73 | 47.91 | 53.27 |
| Cabo Verde | CPV | 2010 | 51.99 | 49.24 | 54.56 |
| Cabo Verde | CPV | 2011 | 53.20 | 50.46 | 55.77 |
| Cabo Verde | CPV | 2012 | 54.07 | 51.30 | 56.72 |
| Cabo Verde | CPV | 2013 | 55.07 | 52.20 | 57.63 |
| Cabo Verde | CPV | 2014 | 56.32 | 53.65 | 58.88 |
| Cabo Verde | CPV | 2015 | 57.14 | 54.45 | 59.77 |
| Cabo Verde | CPV | 2016 | 57.73 | 54.93 | 60.44 |
| Cabo Verde | CPV | 2017 | 58.45 | 55.52 | 61.28 |

|            |     |      |       |       |       |
|------------|-----|------|-------|-------|-------|
| Costa Rica | CRI | 1990 | 61.37 | 57.46 | 64.37 |
| Costa Rica | CRI | 1991 | 61.58 | 57.74 | 64.65 |
| Costa Rica | CRI | 1992 | 61.86 | 57.89 | 65.01 |
| Costa Rica | CRI | 1993 | 62.19 | 57.97 | 65.37 |
| Costa Rica | CRI | 1994 | 61.72 | 57.43 | 64.90 |
| Costa Rica | CRI | 1995 | 61.62 | 56.88 | 64.90 |
| Costa Rica | CRI | 1996 | 62.70 | 57.63 | 66.07 |
| Costa Rica | CRI | 1997 | 63.19 | 58.04 | 66.67 |
| Costa Rica | CRI | 1998 | 63.87 | 58.70 | 67.22 |
| Costa Rica | CRI | 1999 | 64.41 | 59.46 | 67.78 |
| Costa Rica | CRI | 2000 | 66.31 | 61.03 | 69.71 |
| Costa Rica | CRI | 2001 | 66.66 | 61.41 | 70.09 |
| Costa Rica | CRI | 2002 | 67.72 | 62.56 | 71.09 |
| Costa Rica | CRI | 2003 | 68.46 | 63.48 | 71.73 |
| Costa Rica | CRI | 2004 | 69.06 | 64.21 | 72.28 |
| Costa Rica | CRI | 2005 | 70.17 | 65.26 | 73.51 |
| Costa Rica | CRI | 2006 | 70.43 | 65.71 | 73.70 |
| Costa Rica | CRI | 2007 | 72.66 | 68.04 | 75.87 |
| Costa Rica | CRI | 2008 | 72.96 | 68.58 | 76.12 |
| Costa Rica | CRI | 2009 | 73.38 | 69.08 | 76.49 |
| Costa Rica | CRI | 2010 | 72.61 | 68.34 | 75.59 |
| Costa Rica | CRI | 2011 | 73.28 | 68.97 | 76.29 |
| Costa Rica | CRI | 2012 | 73.56 | 69.15 | 76.71 |
| Costa Rica | CRI | 2013 | 73.79 | 69.13 | 77.21 |
| Costa Rica | CRI | 2014 | 73.87 | 68.98 | 77.33 |
| Costa Rica | CRI | 2015 | 73.63 | 68.63 | 77.22 |
| Costa Rica | CRI | 2016 | 73.00 | 67.72 | 76.68 |
| Costa Rica | CRI | 2017 | 73.04 | 67.44 | 77.04 |
| Cuba       | CUB | 1990 | 66.88 | 64.40 | 68.84 |
| Cuba       | CUB | 1991 | 67.32 | 64.67 | 69.41 |
| Cuba       | CUB | 1992 | 67.59 | 64.77 | 69.73 |
| Cuba       | CUB | 1993 | 67.82 | 65.00 | 69.94 |
| Cuba       | CUB | 1994 | 68.10 | 65.29 | 70.21 |
| Cuba       | CUB | 1995 | 68.82 | 66.13 | 70.82 |
| Cuba       | CUB | 1996 | 69.80 | 67.19 | 71.79 |
| Cuba       | CUB | 1997 | 70.70 | 68.22 | 72.64 |
| Cuba       | CUB | 1998 | 71.10 | 68.58 | 73.00 |
| Cuba       | CUB | 1999 | 71.86 | 69.34 | 73.72 |
| Cuba       | CUB | 2000 | 72.90 | 70.35 | 74.71 |
| Cuba       | CUB | 2001 | 73.28 | 70.77 | 75.12 |
| Cuba       | CUB | 2002 | 74.42 | 71.72 | 76.29 |
| Cuba       | CUB | 2003 | 74.58 | 71.85 | 76.52 |
| Cuba       | CUB | 2004 | 74.85 | 71.97 | 76.76 |
| Cuba       | CUB | 2005 | 74.74 | 71.82 | 76.69 |
| Cuba       | CUB | 2006 | 75.65 | 72.73 | 77.64 |
| Cuba       | CUB | 2007 | 75.83 | 72.99 | 77.77 |
| Cuba       | CUB | 2008 | 76.04 | 73.35 | 77.91 |
| Cuba       | CUB | 2009 | 76.32 | 73.82 | 78.14 |
| Cuba       | CUB | 2010 | 76.65 | 74.33 | 78.44 |
| Cuba       | CUB | 2011 | 77.68 | 75.37 | 79.48 |
| Cuba       | CUB | 2012 | 77.28 | 74.95 | 79.12 |
| Cuba       | CUB | 2013 | 77.08 | 74.58 | 79.02 |
| Cuba       | CUB | 2014 | 77.04 | 74.41 | 79.06 |
| Cuba       | CUB | 2015 | 76.61 | 73.88 | 78.79 |
| Cuba       | CUB | 2016 | 76.58 | 73.49 | 79.13 |
| Cuba       | CUB | 2017 | 76.83 | 73.40 | 79.94 |
| Cyprus     | CYP | 1990 | 74.85 | 73.05 | 76.12 |
| Cyprus     | CYP | 1991 | 75.55 | 73.75 | 76.89 |
| Cyprus     | CYP | 1992 | 76.28 | 74.39 | 77.72 |
| Cyprus     | CYP | 1993 | 76.96 | 74.99 | 78.60 |
| Cyprus     | CYP | 1994 | 77.53 | 75.43 | 79.24 |
| Cyprus     | CYP | 1995 | 78.39 | 76.29 | 80.11 |



|         |     |      |       |       |       |
|---------|-----|------|-------|-------|-------|
| Cyprus  | CYP | 1996 | 79.58 | 77.61 | 81.24 |
| Cyprus  | CYP | 1997 | 79.97 | 78.11 | 81.61 |
| Cyprus  | CYP | 1998 | 80.30 | 78.42 | 81.99 |
| Cyprus  | CYP | 1999 | 80.68 | 78.69 | 82.41 |
| Cyprus  | CYP | 2000 | 81.25 | 79.30 | 82.98 |
| Cyprus  | CYP | 2001 | 82.04 | 80.03 | 83.72 |
| Cyprus  | CYP | 2002 | 82.63 | 80.53 | 84.39 |
| Cyprus  | CYP | 2003 | 83.14 | 80.98 | 84.98 |
| Cyprus  | CYP | 2004 | 83.43 | 81.13 | 85.37 |
| Cyprus  | CYP | 2005 | 83.68 | 81.14 | 85.85 |
| Cyprus  | CYP | 2006 | 83.93 | 80.89 | 86.35 |
| Cyprus  | CYP | 2007 | 83.87 | 80.31 | 86.54 |
| Cyprus  | CYP | 2008 | 83.91 | 79.74 | 87.02 |
| Cyprus  | CYP | 2009 | 83.82 | 78.65 | 87.26 |
| Cyprus  | CYP | 2010 | 84.31 | 78.71 | 87.99 |
| Cyprus  | CYP | 2011 | 85.08 | 79.23 | 88.89 |
| Cyprus  | CYP | 2012 | 85.73 | 79.90 | 89.61 |
| Cyprus  | CYP | 2013 | 86.21 | 80.23 | 90.09 |
| Cyprus  | CYP | 2014 | 86.60 | 80.54 | 90.59 |
| Cyprus  | CYP | 2015 | 87.00 | 80.72 | 91.10 |
| Cyprus  | CYP | 2016 | 87.44 | 80.84 | 91.56 |
| Cyprus  | CYP | 2017 | 87.69 | 81.02 | 91.83 |
| Czechia | CZE | 1990 | 62.85 | 59.59 | 65.16 |
| Czechia | CZE | 1991 | 64.53 | 61.23 | 66.82 |
| Czechia | CZE | 1992 | 65.60 | 62.22 | 67.98 |
| Czechia | CZE | 1993 | 67.23 | 63.50 | 69.80 |
| Czechia | CZE | 1994 | 67.60 | 63.43 | 70.53 |
| Czechia | CZE | 1995 | 67.62 | 62.69 | 70.82 |
| Czechia | CZE | 1996 | 68.54 | 62.75 | 71.99 |
| Czechia | CZE | 1997 | 69.17 | 62.68 | 72.90 |
| Czechia | CZE | 1998 | 70.33 | 62.94 | 74.44 |
| Czechia | CZE | 1999 | 70.77 | 63.17 | 75.08 |
| Czechia | CZE | 2000 | 70.85 | 62.71 | 75.41 |
| Czechia | CZE | 2001 | 72.41 | 65.46 | 76.72 |
| Czechia | CZE | 2002 | 73.21 | 66.36 | 77.45 |
| Czechia | CZE | 2003 | 73.18 | 66.24 | 77.47 |
| Czechia | CZE | 2004 | 74.17 | 66.80 | 78.59 |
| Czechia | CZE | 2005 | 74.66 | 66.50 | 79.21 |
| Czechia | CZE | 2006 | 76.15 | 68.53 | 80.42 |
| Czechia | CZE | 2007 | 77.30 | 70.35 | 81.24 |
| Czechia | CZE | 2008 | 77.88 | 71.26 | 81.67 |
| Czechia | CZE | 2009 | 78.28 | 71.19 | 82.23 |
| Czechia | CZE | 2010 | 78.01 | 69.51 | 82.36 |
| Czechia | CZE | 2011 | 77.66 | 67.90 | 82.41 |
| Czechia | CZE | 2012 | 77.78 | 66.94 | 82.80 |
| Czechia | CZE | 2013 | 77.78 | 65.33 | 83.23 |
| Czechia | CZE | 2014 | 78.37 | 64.41 | 83.98 |
| Czechia | CZE | 2015 | 78.53 | 64.63 | 84.24 |
| Czechia | CZE | 2016 | 78.65 | 63.97 | 84.45 |
| Czechia | CZE | 2017 | 78.69 | 64.10 | 84.75 |
| Germany | DEU | 1990 | 80.93 | 78.31 | 82.71 |
| Germany | DEU | 1991 | 81.29 | 78.48 | 83.11 |
| Germany | DEU | 1992 | 82.09 | 79.11 | 83.97 |
| Germany | DEU | 1993 | 82.23 | 79.06 | 84.20 |
| Germany | DEU | 1994 | 82.53 | 79.23 | 84.71 |
| Germany | DEU | 1995 | 82.85 | 79.36 | 85.15 |
| Germany | DEU | 1996 | 83.80 | 80.24 | 86.15 |
| Germany | DEU | 1997 | 84.56 | 80.88 | 86.94 |
| Germany | DEU | 1998 | 85.31 | 81.66 | 87.77 |
| Germany | DEU | 1999 | 85.63 | 81.75 | 88.22 |
| Germany | DEU | 2000 | 85.80 | 81.74 | 88.55 |
| Germany | DEU | 2001 | 86.12 | 81.84 | 89.08 |

|          |     |      |       |       |       |
|----------|-----|------|-------|-------|-------|
| Germany  | DEU | 2002 | 86.16 | 81.60 | 89.33 |
| Germany  | DEU | 2003 | 86.19 | 81.40 | 89.49 |
| Germany  | DEU | 2004 | 86.77 | 81.92 | 90.29 |
| Germany  | DEU | 2005 | 87.08 | 82.50 | 90.71 |
| Germany  | DEU | 2006 | 87.33 | 82.52 | 91.04 |
| Germany  | DEU | 2007 | 87.42 | 82.44 | 91.24 |
| Germany  | DEU | 2008 | 87.51 | 82.36 | 91.40 |
| Germany  | DEU | 2009 | 87.41 | 82.04 | 91.38 |
| Germany  | DEU | 2010 | 87.70 | 82.32 | 91.74 |
| Germany  | DEU | 2011 | 87.59 | 81.77 | 91.67 |
| Germany  | DEU | 2012 | 87.71 | 81.33 | 92.01 |
| Germany  | DEU | 2013 | 87.34 | 80.74 | 91.78 |
| Germany  | DEU | 2014 | 87.62 | 80.51 | 92.05 |
| Germany  | DEU | 2015 | 87.10 | 79.64 | 91.61 |
| Germany  | DEU | 2016 | 86.69 | 79.05 | 91.47 |
| Germany  | DEU | 2017 | 86.73 | 78.76 | 91.88 |
| Djibouti | DJI | 1990 | 9.62  | 5.10  | 13.35 |
| Djibouti | DJI | 1991 | 10.18 | 5.48  | 14.05 |
| Djibouti | DJI | 1992 | 10.03 | 5.23  | 13.99 |
| Djibouti | DJI | 1993 | 10.64 | 5.66  | 14.51 |
| Djibouti | DJI | 1994 | 10.69 | 5.71  | 14.60 |
| Djibouti | DJI | 1995 | 11.20 | 6.01  | 15.11 |
| Djibouti | DJI | 1996 | 11.23 | 6.16  | 15.33 |
| Djibouti | DJI | 1997 | 11.40 | 6.40  | 15.69 |
| Djibouti | DJI | 1998 | 11.77 | 6.62  | 15.90 |
| Djibouti | DJI | 1999 | 12.33 | 7.02  | 16.43 |
| Djibouti | DJI | 2000 | 13.47 | 7.89  | 17.39 |
| Djibouti | DJI | 2001 | 14.31 | 8.67  | 18.09 |
| Djibouti | DJI | 2002 | 15.27 | 10.12 | 19.17 |
| Djibouti | DJI | 2003 | 16.78 | 12.27 | 20.58 |
| Djibouti | DJI | 2004 | 17.77 | 13.34 | 21.82 |
| Djibouti | DJI | 2005 | 18.82 | 14.41 | 22.92 |
| Djibouti | DJI | 2006 | 19.71 | 15.34 | 23.81 |
| Djibouti | DJI | 2007 | 20.72 | 16.26 | 25.37 |
| Djibouti | DJI | 2008 | 21.84 | 17.01 | 26.88 |
| Djibouti | DJI | 2009 | 23.04 | 17.88 | 28.55 |
| Djibouti | DJI | 2010 | 24.33 | 18.99 | 30.06 |
| Djibouti | DJI | 2011 | 25.72 | 19.92 | 31.52 |
| Djibouti | DJI | 2012 | 27.28 | 21.27 | 32.90 |
| Djibouti | DJI | 2013 | 28.82 | 22.70 | 34.20 |
| Djibouti | DJI | 2014 | 30.04 | 23.93 | 35.44 |
| Djibouti | DJI | 2015 | 31.31 | 25.09 | 36.89 |
| Djibouti | DJI | 2016 | 32.58 | 26.32 | 38.23 |
| Djibouti | DJI | 2017 | 33.70 | 27.44 | 39.45 |
| Dominica | DMA | 1990 | 62.87 | 60.13 | 65.44 |
| Dominica | DMA | 1991 | 62.68 | 59.85 | 65.32 |
| Dominica | DMA | 1992 | 62.88 | 59.98 | 65.51 |
| Dominica | DMA | 1993 | 63.21 | 60.25 | 65.91 |
| Dominica | DMA | 1994 | 63.55 | 60.44 | 66.34 |
| Dominica | DMA | 1995 | 64.17 | 60.99 | 67.01 |
| Dominica | DMA | 1996 | 64.66 | 61.44 | 67.54 |
| Dominica | DMA | 1997 | 65.44 | 62.21 | 68.31 |
| Dominica | DMA | 1998 | 66.29 | 63.04 | 69.13 |
| Dominica | DMA | 1999 | 67.00 | 63.79 | 69.87 |
| Dominica | DMA | 2000 | 67.64 | 64.43 | 70.57 |
| Dominica | DMA | 2001 | 68.27 | 64.96 | 71.28 |
| Dominica | DMA | 2002 | 68.75 | 65.35 | 71.84 |
| Dominica | DMA | 2003 | 68.97 | 65.65 | 72.07 |
| Dominica | DMA | 2004 | 69.19 | 65.82 | 72.26 |
| Dominica | DMA | 2005 | 69.54 | 66.15 | 72.68 |
| Dominica | DMA | 2006 | 69.89 | 66.57 | 73.01 |
| Dominica | DMA | 2007 | 70.26 | 66.91 | 73.48 |

|                    |     |      |       |       |       |
|--------------------|-----|------|-------|-------|-------|
| Dominica           | DMA | 2008 | 70.85 | 67.55 | 74.01 |
| Dominica           | DMA | 2009 | 71.20 | 67.83 | 74.39 |
| Dominica           | DMA | 2010 | 71.39 | 68.10 | 74.48 |
| Dominica           | DMA | 2011 | 71.15 | 67.89 | 74.22 |
| Dominica           | DMA | 2012 | 71.17 | 67.83 | 74.27 |
| Dominica           | DMA | 2013 | 70.99 | 67.58 | 74.11 |
| Dominica           | DMA | 2014 | 70.73 | 67.08 | 73.94 |
| Dominica           | DMA | 2015 | 70.82 | 67.10 | 74.00 |
| Dominica           | DMA | 2016 | 71.04 | 67.33 | 74.26 |
| Dominica           | DMA | 2017 | 71.21 | 67.46 | 74.54 |
| Denmark            | DNK | 1990 | 76.78 | 73.32 | 79.04 |
| Denmark            | DNK | 1991 | 77.33 | 73.58 | 79.74 |
| Denmark            | DNK | 1992 | 77.28 | 73.20 | 79.85 |
| Denmark            | DNK | 1993 | 77.03 | 72.48 | 79.69 |
| Denmark            | DNK | 1994 | 76.71 | 72.14 | 79.57 |
| Denmark            | DNK | 1995 | 76.78 | 71.91 | 79.89 |
| Denmark            | DNK | 1996 | 77.02 | 71.62 | 80.29 |
| Denmark            | DNK | 1997 | 77.95 | 71.78 | 81.52 |
| Denmark            | DNK | 1998 | 78.46 | 71.97 | 82.34 |
| Denmark            | DNK | 1999 | 77.56 | 70.27 | 81.83 |
| Denmark            | DNK | 2000 | 78.96 | 70.65 | 83.53 |
| Denmark            | DNK | 2001 | 79.17 | 70.11 | 84.03 |
| Denmark            | DNK | 2002 | 78.96 | 68.15 | 84.14 |
| Denmark            | DNK | 2003 | 79.37 | 67.97 | 84.88 |
| Denmark            | DNK | 2004 | 79.81 | 66.53 | 85.71 |
| Denmark            | DNK | 2005 | 80.64 | 65.49 | 86.69 |
| Denmark            | DNK | 2006 | 80.50 | 63.71 | 86.69 |
| Denmark            | DNK | 2007 | 80.60 | 63.88 | 86.90 |
| Denmark            | DNK | 2008 | 81.25 | 64.03 | 87.69 |
| Denmark            | DNK | 2009 | 81.09 | 60.04 | 87.90 |
| Denmark            | DNK | 2010 | 81.30 | 60.30 | 88.37 |
| Denmark            | DNK | 2011 | 82.19 | 60.91 | 89.17 |
| Denmark            | DNK | 2012 | 82.93 | 61.37 | 89.86 |
| Denmark            | DNK | 2013 | 83.64 | 61.81 | 90.48 |
| Denmark            | DNK | 2014 | 84.04 | 62.98 | 90.89 |
| Denmark            | DNK | 2015 | 84.36 | 66.02 | 91.26 |
| Denmark            | DNK | 2016 | 84.21 | 66.91 | 91.11 |
| Denmark            | DNK | 2017 | 83.99 | 67.19 | 91.00 |
| Dominican Republic | DOM | 1990 | 54.17 | 51.63 | 56.63 |
| Dominican Republic | DOM | 1991 | 54.64 | 52.03 | 57.04 |
| Dominican Republic | DOM | 1992 | 55.39 | 52.79 | 57.86 |
| Dominican Republic | DOM | 1993 | 56.11 | 53.67 | 58.49 |
| Dominican Republic | DOM | 1994 | 57.19 | 54.84 | 59.34 |
| Dominican Republic | DOM | 1995 | 57.68 | 55.35 | 59.80 |
| Dominican Republic | DOM | 1996 | 58.03 | 55.81 | 60.20 |
| Dominican Republic | DOM | 1997 | 58.48 | 56.30 | 60.59 |
| Dominican Republic | DOM | 1998 | 59.27 | 57.08 | 61.35 |
| Dominican Republic | DOM | 1999 | 60.04 | 57.96 | 62.12 |
| Dominican Republic | DOM | 2000 | 61.07 | 58.95 | 63.12 |
| Dominican Republic | DOM | 2001 | 62.36 | 60.16 | 64.40 |
| Dominican Republic | DOM | 2002 | 62.80 | 60.68 | 64.75 |
| Dominican Republic | DOM | 2003 | 62.76 | 60.59 | 64.80 |
| Dominican Republic | DOM | 2004 | 62.66 | 60.49 | 64.77 |
| Dominican Republic | DOM | 2005 | 62.88 | 60.46 | 65.07 |
| Dominican Republic | DOM | 2006 | 63.20 | 60.70 | 65.54 |
| Dominican Republic | DOM | 2007 | 63.65 | 61.09 | 66.05 |
| Dominican Republic | DOM | 2008 | 64.29 | 61.79 | 66.54 |
| Dominican Republic | DOM | 2009 | 64.80 | 62.25 | 66.94 |
| Dominican Republic | DOM | 2010 | 65.24 | 62.46 | 67.55 |
| Dominican Republic | DOM | 2011 | 65.48 | 62.96 | 67.87 |
| Dominican Republic | DOM | 2012 | 65.32 | 62.62 | 67.63 |
| Dominican Republic | DOM | 2013 | 64.65 | 61.71 | 67.14 |

|                    |     |      |       |       |       |
|--------------------|-----|------|-------|-------|-------|
| Dominican Republic | DOM | 2014 | 64.07 | 61.02 | 66.71 |
| Dominican Republic | DOM | 2015 | 63.72 | 60.50 | 66.48 |
| Dominican Republic | DOM | 2016 | 63.74 | 60.24 | 66.91 |
| Dominican Republic | DOM | 2017 | 64.35 | 60.52 | 67.94 |
| Algeria            | DZA | 1990 | 40.70 | 38.31 | 42.87 |
| Algeria            | DZA | 1991 | 41.70 | 39.27 | 43.92 |
| Algeria            | DZA | 1992 | 42.65 | 40.19 | 44.88 |
| Algeria            | DZA | 1993 | 43.62 | 41.23 | 45.78 |
| Algeria            | DZA | 1994 | 44.50 | 41.99 | 46.74 |
| Algeria            | DZA | 1995 | 45.25 | 42.70 | 47.53 |
| Algeria            | DZA | 1996 | 45.98 | 43.53 | 48.28 |
| Algeria            | DZA | 1997 | 46.66 | 44.24 | 48.98 |
| Algeria            | DZA | 1998 | 47.22 | 44.87 | 49.58 |
| Algeria            | DZA | 1999 | 47.43 | 44.91 | 49.76 |
| Algeria            | DZA | 2000 | 47.81 | 45.22 | 50.16 |
| Algeria            | DZA | 2001 | 48.61 | 45.91 | 51.01 |
| Algeria            | DZA | 2002 | 49.45 | 46.61 | 51.94 |
| Algeria            | DZA | 2003 | 50.25 | 47.35 | 52.82 |
| Algeria            | DZA | 2004 | 51.16 | 47.98 | 53.88 |
| Algeria            | DZA | 2005 | 52.10 | 48.77 | 54.83 |
| Algeria            | DZA | 2006 | 53.60 | 49.86 | 56.38 |
| Algeria            | DZA | 2007 | 54.88 | 50.86 | 57.80 |
| Algeria            | DZA | 2008 | 55.92 | 51.51 | 58.95 |
| Algeria            | DZA | 2009 | 57.01 | 52.65 | 60.13 |
| Algeria            | DZA | 2010 | 58.19 | 53.76 | 61.34 |
| Algeria            | DZA | 2011 | 59.10 | 54.40 | 62.44 |
| Algeria            | DZA | 2012 | 60.07 | 54.84 | 63.53 |
| Algeria            | DZA | 2013 | 60.63 | 54.33 | 64.28 |
| Algeria            | DZA | 2014 | 60.98 | 53.53 | 64.95 |
| Algeria            | DZA | 2015 | 61.43 | 52.10 | 65.66 |
| Algeria            | DZA | 2016 | 61.95 | 52.62 | 66.42 |
| Algeria            | DZA | 2017 | 62.53 | 52.45 | 67.40 |
| Ecuador            | ECU | 1990 | 51.64 | 47.90 | 54.73 |
| Ecuador            | ECU | 1991 | 51.74 | 48.21 | 54.66 |
| Ecuador            | ECU | 1992 | 52.92 | 49.59 | 55.66 |
| Ecuador            | ECU | 1993 | 54.32 | 51.16 | 57.02 |
| Ecuador            | ECU | 1994 | 55.68 | 52.57 | 58.18 |
| Ecuador            | ECU | 1995 | 56.97 | 54.00 | 59.38 |
| Ecuador            | ECU | 1996 | 57.49 | 54.59 | 59.77 |
| Ecuador            | ECU | 1997 | 59.11 | 56.42 | 61.21 |
| Ecuador            | ECU | 1998 | 59.76 | 57.39 | 61.69 |
| Ecuador            | ECU | 1999 | 60.62 | 58.47 | 62.41 |
| Ecuador            | ECU | 2000 | 61.55 | 59.59 | 63.27 |
| Ecuador            | ECU | 2001 | 63.31 | 61.45 | 65.01 |
| Ecuador            | ECU | 2002 | 63.37 | 61.58 | 65.08 |
| Ecuador            | ECU | 2003 | 63.92 | 62.13 | 65.67 |
| Ecuador            | ECU | 2004 | 64.68 | 62.88 | 66.53 |
| Ecuador            | ECU | 2005 | 65.00 | 63.12 | 66.84 |
| Ecuador            | ECU | 2006 | 66.26 | 64.35 | 67.99 |
| Ecuador            | ECU | 2007 | 66.14 | 64.25 | 67.87 |
| Ecuador            | ECU | 2008 | 66.71 | 64.70 | 68.49 |
| Ecuador            | ECU | 2009 | 67.36 | 65.34 | 69.18 |
| Ecuador            | ECU | 2010 | 68.00 | 65.89 | 69.93 |
| Ecuador            | ECU | 2011 | 68.69 | 66.48 | 70.69 |
| Ecuador            | ECU | 2012 | 69.44 | 67.13 | 71.64 |
| Ecuador            | ECU | 2013 | 70.25 | 67.81 | 72.60 |
| Ecuador            | ECU | 2014 | 70.84 | 68.33 | 73.17 |
| Ecuador            | ECU | 2015 | 71.27 | 68.53 | 73.73 |
| Ecuador            | ECU | 2016 | 71.22 | 68.32 | 73.74 |
| Ecuador            | ECU | 2017 | 71.52 | 68.30 | 74.41 |
| Egypt              | EGY | 1990 | 36.77 | 34.34 | 38.92 |
| Egypt              | EGY | 1991 | 37.29 | 34.69 | 39.54 |

|         |     |      |       |       |       |
|---------|-----|------|-------|-------|-------|
| Egypt   | EGY | 1992 | 38.01 | 35.13 | 40.40 |
| Egypt   | EGY | 1993 | 38.33 | 35.48 | 40.66 |
| Egypt   | EGY | 1994 | 38.74 | 35.81 | 41.16 |
| Egypt   | EGY | 1995 | 39.91 | 36.92 | 42.30 |
| Egypt   | EGY | 1996 | 40.92 | 38.25 | 43.18 |
| Egypt   | EGY | 1997 | 41.72 | 39.15 | 43.97 |
| Egypt   | EGY | 1998 | 43.00 | 40.64 | 45.14 |
| Egypt   | EGY | 1999 | 43.84 | 41.28 | 46.05 |
| Egypt   | EGY | 2000 | 44.97 | 42.40 | 47.14 |
| Egypt   | EGY | 2001 | 45.24 | 42.83 | 47.32 |
| Egypt   | EGY | 2002 | 45.74 | 43.39 | 47.76 |
| Egypt   | EGY | 2003 | 46.08 | 43.77 | 48.08 |
| Egypt   | EGY | 2004 | 46.25 | 43.80 | 48.31 |
| Egypt   | EGY | 2005 | 46.49 | 43.75 | 48.71 |
| Egypt   | EGY | 2006 | 46.56 | 43.50 | 49.01 |
| Egypt   | EGY | 2007 | 47.21 | 43.73 | 49.89 |
| Egypt   | EGY | 2008 | 46.85 | 42.47 | 49.94 |
| Egypt   | EGY | 2009 | 47.03 | 42.33 | 50.12 |
| Egypt   | EGY | 2010 | 47.58 | 42.95 | 50.67 |
| Egypt   | EGY | 2011 | 48.25 | 43.15 | 51.65 |
| Egypt   | EGY | 2012 | 48.41 | 42.75 | 51.87 |
| Egypt   | EGY | 2013 | 49.11 | 42.52 | 52.92 |
| Egypt   | EGY | 2014 | 49.10 | 40.86 | 53.28 |
| Egypt   | EGY | 2015 | 48.37 | 37.09 | 53.05 |
| Egypt   | EGY | 2016 | 48.49 | 36.99 | 54.00 |
| Egypt   | EGY | 2017 | 48.64 | 37.29 | 54.95 |
| Eritrea | ERI | 1990 | 3.17  | 1.76  | 5.52  |
| Eritrea | ERI | 1991 | 3.19  | 1.86  | 5.17  |
| Eritrea | ERI | 1992 | 3.68  | 2.01  | 5.78  |
| Eritrea | ERI | 1993 | 4.36  | 2.30  | 6.66  |
| Eritrea | ERI | 1994 | 4.99  | 2.55  | 7.32  |
| Eritrea | ERI | 1995 | 5.37  | 2.73  | 7.75  |
| Eritrea | ERI | 1996 | 6.28  | 3.62  | 8.67  |
| Eritrea | ERI | 1997 | 7.40  | 4.67  | 9.65  |
| Eritrea | ERI | 1998 | 8.72  | 5.77  | 12.08 |
| Eritrea | ERI | 1999 | 9.78  | 7.19  | 12.41 |
| Eritrea | ERI | 2000 | 11.43 | 8.19  | 16.45 |
| Eritrea | ERI | 2001 | 13.61 | 9.22  | 18.89 |
| Eritrea | ERI | 2002 | 16.56 | 10.98 | 21.58 |
| Eritrea | ERI | 2003 | 18.21 | 12.31 | 23.20 |
| Eritrea | ERI | 2004 | 19.56 | 14.31 | 24.50 |
| Eritrea | ERI | 2005 | 20.81 | 15.54 | 25.68 |
| Eritrea | ERI | 2006 | 21.90 | 17.00 | 26.71 |
| Eritrea | ERI | 2007 | 23.27 | 18.39 | 28.08 |
| Eritrea | ERI | 2008 | 24.33 | 19.43 | 29.20 |
| Eritrea | ERI | 2009 | 25.17 | 20.26 | 29.79 |
| Eritrea | ERI | 2010 | 26.35 | 21.32 | 31.14 |
| Eritrea | ERI | 2011 | 27.38 | 22.58 | 31.78 |
| Eritrea | ERI | 2012 | 28.97 | 24.41 | 33.53 |
| Eritrea | ERI | 2013 | 30.17 | 25.50 | 34.56 |
| Eritrea | ERI | 2014 | 33.69 | 29.37 | 37.92 |
| Eritrea | ERI | 2015 | 31.89 | 27.07 | 36.52 |
| Eritrea | ERI | 2016 | 33.36 | 28.63 | 37.98 |
| Eritrea | ERI | 2017 | 34.75 | 30.03 | 39.39 |
| Spain   | ESP | 1990 | 70.20 | 68.11 | 71.97 |
| Spain   | ESP | 1991 | 70.49 | 68.18 | 72.35 |
| Spain   | ESP | 1992 | 71.15 | 68.55 | 73.16 |
| Spain   | ESP | 1993 | 71.76 | 68.93 | 73.80 |
| Spain   | ESP | 1994 | 72.30 | 69.23 | 74.48 |
| Spain   | ESP | 1995 | 72.65 | 69.30 | 74.99 |
| Spain   | ESP | 1996 | 73.34 | 69.86 | 75.83 |
| Spain   | ESP | 1997 | 74.06 | 70.16 | 76.76 |

|          |     |      |       |       |       |
|----------|-----|------|-------|-------|-------|
| Spain    | ESP | 1998 | 74.34 | 70.14 | 77.24 |
| Spain    | ESP | 1999 | 74.33 | 69.68 | 77.48 |
| Spain    | ESP | 2000 | 75.28 | 70.41 | 78.50 |
| Spain    | ESP | 2001 | 75.92 | 70.79 | 79.20 |
| Spain    | ESP | 2002 | 76.46 | 71.22 | 79.91 |
| Spain    | ESP | 2003 | 76.83 | 71.32 | 80.37 |
| Spain    | ESP | 2004 | 77.59 | 71.73 | 81.32 |
| Spain    | ESP | 2005 | 78.23 | 72.29 | 82.03 |
| Spain    | ESP | 2006 | 78.97 | 72.92 | 82.87 |
| Spain    | ESP | 2007 | 79.41 | 73.15 | 83.44 |
| Spain    | ESP | 2008 | 79.70 | 73.03 | 83.81 |
| Spain    | ESP | 2009 | 79.87 | 72.28 | 84.39 |
| Spain    | ESP | 2010 | 80.14 | 71.67 | 85.00 |
| Spain    | ESP | 2011 | 80.69 | 72.37 | 85.50 |
| Spain    | ESP | 2012 | 81.33 | 73.15 | 86.08 |
| Spain    | ESP | 2013 | 81.80 | 73.80 | 86.49 |
| Spain    | ESP | 2014 | 82.00 | 73.68 | 86.71 |
| Spain    | ESP | 2015 | 82.20 | 73.43 | 86.91 |
| Spain    | ESP | 2016 | 82.34 | 73.22 | 87.15 |
| Spain    | ESP | 2017 | 82.44 | 73.01 | 87.45 |
| Estonia  | EST | 1990 | 64.62 | 62.04 | 66.65 |
| Estonia  | EST | 1991 | 63.60 | 60.81 | 65.74 |
| Estonia  | EST | 1992 | 63.60 | 60.76 | 65.73 |
| Estonia  | EST | 1993 | 60.21 | 57.41 | 62.44 |
| Estonia  | EST | 1994 | 56.66 | 53.78 | 59.28 |
| Estonia  | EST | 1995 | 59.76 | 57.32 | 62.05 |
| Estonia  | EST | 1996 | 65.45 | 63.01 | 67.45 |
| Estonia  | EST | 1997 | 66.39 | 63.88 | 68.30 |
| Estonia  | EST | 1998 | 66.37 | 63.81 | 68.45 |
| Estonia  | EST | 1999 | 68.60 | 66.04 | 70.72 |
| Estonia  | EST | 2000 | 69.46 | 66.86 | 71.49 |
| Estonia  | EST | 2001 | 69.24 | 66.69 | 71.34 |
| Estonia  | EST | 2002 | 70.35 | 67.67 | 72.51 |
| Estonia  | EST | 2003 | 71.40 | 68.70 | 73.65 |
| Estonia  | EST | 2004 | 72.07 | 69.18 | 74.36 |
| Estonia  | EST | 2005 | 72.73 | 69.51 | 75.24 |
| Estonia  | EST | 2006 | 72.63 | 69.01 | 75.40 |
| Estonia  | EST | 2007 | 72.59 | 68.46 | 75.42 |
| Estonia  | EST | 2008 | 74.30 | 69.51 | 77.36 |
| Estonia  | EST | 2009 | 75.57 | 70.81 | 78.71 |
| Estonia  | EST | 2010 | 77.14 | 71.67 | 80.54 |
| Estonia  | EST | 2011 | 77.16 | 71.39 | 80.74 |
| Estonia  | EST | 2012 | 77.02 | 70.84 | 80.87 |
| Estonia  | EST | 2013 | 77.54 | 70.28 | 81.62 |
| Estonia  | EST | 2014 | 77.37 | 69.60 | 81.67 |
| Estonia  | EST | 2015 | 78.33 | 70.26 | 82.85 |
| Estonia  | EST | 2016 | 78.61 | 69.05 | 83.38 |
| Estonia  | EST | 2017 | 78.80 | 68.76 | 84.24 |
| Ethiopia | ETH | 1990 | 4.22  | 3.89  | 4.54  |
| Ethiopia | ETH | 1991 | 4.22  | 3.93  | 4.51  |
| Ethiopia | ETH | 1992 | 4.22  | 3.97  | 4.47  |
| Ethiopia | ETH | 1993 | 4.24  | 4.02  | 4.45  |
| Ethiopia | ETH | 1994 | 4.27  | 4.07  | 4.47  |
| Ethiopia | ETH | 1995 | 4.31  | 4.11  | 4.49  |
| Ethiopia | ETH | 1996 | 4.38  | 4.20  | 4.55  |
| Ethiopia | ETH | 1997 | 4.44  | 4.26  | 4.60  |
| Ethiopia | ETH | 1998 | 4.52  | 4.35  | 4.67  |
| Ethiopia | ETH | 1999 | 4.60  | 4.44  | 4.75  |
| Ethiopia | ETH | 2000 | 4.68  | 4.53  | 4.82  |
| Ethiopia | ETH | 2001 | 4.77  | 4.61  | 5.00  |
| Ethiopia | ETH | 2002 | 5.04  | 4.73  | 5.60  |
| Ethiopia | ETH | 2003 | 5.56  | 5.00  | 6.71  |

|          |     |      |       |       |       |
|----------|-----|------|-------|-------|-------|
| Ethiopia | ETH | 2004 | 6.21  | 5.52  | 8.19  |
| Ethiopia | ETH | 2005 | 7.73  | 6.06  | 11.16 |
| Ethiopia | ETH | 2006 | 9.43  | 6.68  | 14.28 |
| Ethiopia | ETH | 2007 | 11.04 | 8.33  | 16.57 |
| Ethiopia | ETH | 2008 | 12.65 | 9.68  | 18.74 |
| Ethiopia | ETH | 2009 | 14.42 | 10.81 | 20.65 |
| Ethiopia | ETH | 2010 | 16.80 | 11.95 | 23.15 |
| Ethiopia | ETH | 2011 | 19.18 | 13.05 | 25.34 |
| Ethiopia | ETH | 2012 | 21.55 | 14.10 | 27.27 |
| Ethiopia | ETH | 2013 | 24.09 | 14.99 | 29.20 |
| Ethiopia | ETH | 2014 | 25.94 | 15.89 | 30.85 |
| Ethiopia | ETH | 2015 | 27.88 | 16.99 | 32.49 |
| Ethiopia | ETH | 2016 | 29.70 | 17.97 | 34.09 |
| Ethiopia | ETH | 2017 | 31.39 | 20.64 | 35.57 |
| Finland  | FIN | 1990 | 78.00 | 75.52 | 79.88 |
| Finland  | FIN | 1991 | 78.98 | 76.46 | 80.92 |
| Finland  | FIN | 1992 | 79.74 | 77.16 | 81.67 |
| Finland  | FIN | 1993 | 80.64 | 78.00 | 82.60 |
| Finland  | FIN | 1994 | 81.89 | 79.14 | 83.91 |
| Finland  | FIN | 1995 | 82.02 | 79.27 | 84.09 |
| Finland  | FIN | 1996 | 83.43 | 80.56 | 85.56 |
| Finland  | FIN | 1997 | 83.87 | 80.98 | 86.02 |
| Finland  | FIN | 1998 | 84.42 | 81.35 | 86.61 |
| Finland  | FIN | 1999 | 84.99 | 81.87 | 87.26 |
| Finland  | FIN | 2000 | 85.62 | 82.41 | 87.85 |
| Finland  | FIN | 2001 | 86.64 | 83.50 | 88.96 |
| Finland  | FIN | 2002 | 87.27 | 84.03 | 89.62 |
| Finland  | FIN | 2003 | 87.65 | 84.32 | 90.03 |
| Finland  | FIN | 2004 | 87.55 | 84.28 | 89.94 |
| Finland  | FIN | 2005 | 88.11 | 84.77 | 90.47 |
| Finland  | FIN | 2006 | 89.23 | 85.88 | 91.53 |
| Finland  | FIN | 2007 | 89.59 | 86.38 | 91.90 |
| Finland  | FIN | 2008 | 90.22 | 87.19 | 92.46 |
| Finland  | FIN | 2009 | 90.32 | 87.00 | 92.76 |
| Finland  | FIN | 2010 | 90.47 | 86.91 | 93.06 |
| Finland  | FIN | 2011 | 90.75 | 86.87 | 93.41 |
| Finland  | FIN | 2012 | 91.00 | 86.83 | 93.74 |
| Finland  | FIN | 2013 | 91.21 | 86.87 | 94.00 |
| Finland  | FIN | 2014 | 91.51 | 87.13 | 94.42 |
| Finland  | FIN | 2015 | 91.45 | 86.81 | 94.49 |
| Finland  | FIN | 2016 | 91.37 | 86.47 | 94.49 |
| Finland  | FIN | 2017 | 91.27 | 86.38 | 94.45 |
| Fiji     | FJI | 1990 | 37.27 | 29.76 | 42.14 |
| Fiji     | FJI | 1991 | 37.14 | 29.57 | 42.06 |
| Fiji     | FJI | 1992 | 36.90 | 29.29 | 42.05 |
| Fiji     | FJI | 1993 | 36.16 | 28.99 | 41.10 |
| Fiji     | FJI | 1994 | 34.54 | 26.77 | 39.28 |
| Fiji     | FJI | 1995 | 32.72 | 24.64 | 37.51 |
| Fiji     | FJI | 1996 | 30.33 | 24.07 | 35.47 |
| Fiji     | FJI | 1997 | 25.35 | 23.50 | 30.82 |
| Fiji     | FJI | 1998 | 26.89 | 23.81 | 32.98 |
| Fiji     | FJI | 1999 | 25.54 | 23.82 | 30.77 |
| Fiji     | FJI | 2000 | 25.54 | 23.80 | 30.42 |
| Fiji     | FJI | 2001 | 28.85 | 24.23 | 34.86 |
| Fiji     | FJI | 2002 | 32.58 | 25.43 | 37.25 |
| Fiji     | FJI | 2003 | 33.45 | 27.03 | 37.89 |
| Fiji     | FJI | 2004 | 35.73 | 30.97 | 39.71 |
| Fiji     | FJI | 2005 | 34.22 | 27.76 | 38.79 |
| Fiji     | FJI | 2006 | 33.29 | 25.99 | 38.32 |
| Fiji     | FJI | 2007 | 32.32 | 25.67 | 37.63 |
| Fiji     | FJI | 2008 | 32.58 | 25.90 | 37.94 |
| Fiji     | FJI | 2009 | 36.21 | 30.88 | 40.39 |

|                           |     |      |       |       |       |
|---------------------------|-----|------|-------|-------|-------|
| Fiji                      | FJI | 2010 | 37.38 | 32.62 | 41.36 |
| Fiji                      | FJI | 2011 | 38.74 | 34.51 | 42.44 |
| Fiji                      | FJI | 2012 | 39.30 | 34.93 | 42.98 |
| Fiji                      | FJI | 2013 | 39.98 | 34.53 | 44.17 |
| Fiji                      | FJI | 2014 | 40.35 | 33.15 | 45.50 |
| Fiji                      | FJI | 2015 | 40.88 | 31.79 | 47.03 |
| Fiji                      | FJI | 2016 | 41.41 | 29.62 | 48.28 |
| Fiji                      | FJI | 2017 | 41.93 | 27.53 | 49.60 |
| France                    | FRA | 1990 | 79.59 | 77.21 | 81.38 |
| France                    | FRA | 1991 | 80.08 | 77.64 | 81.97 |
| France                    | FRA | 1992 | 80.57 | 77.87 | 82.57 |
| France                    | FRA | 1993 | 80.69 | 77.95 | 82.80 |
| France                    | FRA | 1994 | 81.17 | 78.28 | 83.34 |
| France                    | FRA | 1995 | 81.61 | 78.56 | 83.94 |
| France                    | FRA | 1996 | 82.50 | 79.36 | 84.96 |
| France                    | FRA | 1997 | 82.98 | 79.72 | 85.59 |
| France                    | FRA | 1998 | 82.93 | 79.60 | 85.53 |
| France                    | FRA | 1999 | 83.37 | 79.93 | 85.96 |
| France                    | FRA | 2000 | 83.98 | 80.36 | 86.68 |
| France                    | FRA | 2001 | 84.25 | 80.37 | 87.03 |
| France                    | FRA | 2002 | 84.68 | 80.49 | 87.44 |
| France                    | FRA | 2003 | 85.28 | 81.05 | 88.05 |
| France                    | FRA | 2004 | 86.44 | 82.12 | 89.28 |
| France                    | FRA | 2005 | 86.69 | 82.29 | 89.54 |
| France                    | FRA | 2006 | 87.08 | 82.56 | 90.05 |
| France                    | FRA | 2007 | 87.61 | 83.09 | 90.57 |
| France                    | FRA | 2008 | 87.83 | 83.16 | 90.87 |
| France                    | FRA | 2009 | 87.76 | 82.73 | 90.91 |
| France                    | FRA | 2010 | 88.01 | 82.80 | 91.39 |
| France                    | FRA | 2011 | 88.28 | 82.79 | 91.60 |
| France                    | FRA | 2012 | 88.56 | 82.73 | 91.99 |
| France                    | FRA | 2013 | 88.83 | 82.81 | 92.37 |
| France                    | FRA | 2014 | 89.14 | 82.98 | 92.69 |
| France                    | FRA | 2015 | 89.22 | 83.05 | 92.84 |
| France                    | FRA | 2016 | 89.48 | 83.18 | 93.14 |
| France                    | FRA | 2017 | 89.45 | 82.86 | 93.20 |
| ronesia (Federated State: | FSM | 1990 | 26.74 | 19.60 | 35.27 |
| ronesia (Federated State: | FSM | 1991 | 27.45 | 19.86 | 35.77 |
| ronesia (Federated State: | FSM | 1992 | 28.26 | 20.20 | 36.53 |
| ronesia (Federated State: | FSM | 1993 | 29.19 | 20.46 | 37.11 |
| ronesia (Federated State: | FSM | 1994 | 30.00 | 20.69 | 37.49 |
| ronesia (Federated State: | FSM | 1995 | 31.02 | 21.03 | 38.19 |
| ronesia (Federated State: | FSM | 1996 | 31.74 | 21.57 | 38.79 |
| ronesia (Federated State: | FSM | 1997 | 32.40 | 21.92 | 39.16 |
| ronesia (Federated State: | FSM | 1998 | 33.16 | 22.44 | 39.63 |
| ronesia (Federated State: | FSM | 1999 | 34.73 | 24.76 | 40.96 |
| ronesia (Federated State: | FSM | 2000 | 34.46 | 25.28 | 40.39 |
| ronesia (Federated State: | FSM | 2001 | 35.62 | 26.94 | 41.62 |
| ronesia (Federated State: | FSM | 2002 | 36.47 | 28.44 | 42.45 |
| ronesia (Federated State: | FSM | 2003 | 38.12 | 30.18 | 43.86 |
| ronesia (Federated State: | FSM | 2004 | 39.34 | 31.46 | 45.10 |
| ronesia (Federated State: | FSM | 2005 | 39.95 | 32.41 | 45.67 |
| ronesia (Federated State: | FSM | 2006 | 40.38 | 32.64 | 46.20 |
| ronesia (Federated State: | FSM | 2007 | 40.83 | 32.82 | 46.93 |
| ronesia (Federated State: | FSM | 2008 | 41.25 | 32.68 | 47.36 |
| ronesia (Federated State: | FSM | 2009 | 41.75 | 32.94 | 47.87 |
| ronesia (Federated State: | FSM | 2010 | 41.07 | 32.65 | 47.24 |
| ronesia (Federated State: | FSM | 2011 | 41.47 | 33.14 | 47.98 |
| ronesia (Federated State: | FSM | 2012 | 42.71 | 34.03 | 49.39 |
| ronesia (Federated State: | FSM | 2013 | 41.73 | 33.08 | 49.09 |
| ronesia (Federated State: | FSM | 2014 | 43.05 | 33.38 | 50.87 |
| ronesia (Federated State: | FSM | 2015 | 43.04 | 33.27 | 51.33 |



|                           |     |      |       |       |       |
|---------------------------|-----|------|-------|-------|-------|
| ronesia (Federated State: | FSM | 2016 | 42.73 | 32.43 | 51.76 |
| ronesia (Federated State: | FSM | 2017 | 43.27 | 32.92 | 52.62 |
| Gabon                     | GAB | 1990 | 34.16 | 29.33 | 38.33 |
| Gabon                     | GAB | 1991 | 35.22 | 30.66 | 39.15 |
| Gabon                     | GAB | 1992 | 36.05 | 31.53 | 39.99 |
| Gabon                     | GAB | 1993 | 36.94 | 32.56 | 40.98 |
| Gabon                     | GAB | 1994 | 37.25 | 33.01 | 41.20 |
| Gabon                     | GAB | 1995 | 37.47 | 33.35 | 41.44 |
| Gabon                     | GAB | 1996 | 37.82 | 33.74 | 41.76 |
| Gabon                     | GAB | 1997 | 38.31 | 34.07 | 42.21 |
| Gabon                     | GAB | 1998 | 38.63 | 34.42 | 42.63 |
| Gabon                     | GAB | 1999 | 39.08 | 34.96 | 42.88 |
| Gabon                     | GAB | 2000 | 39.10 | 34.96 | 42.92 |
| Gabon                     | GAB | 2001 | 40.00 | 35.85 | 43.88 |
| Gabon                     | GAB | 2002 | 41.09 | 36.96 | 45.16 |
| Gabon                     | GAB | 2003 | 41.49 | 37.28 | 45.60 |
| Gabon                     | GAB | 2004 | 42.15 | 37.96 | 46.05 |
| Gabon                     | GAB | 2005 | 43.25 | 39.15 | 47.10 |
| Gabon                     | GAB | 2006 | 44.16 | 40.07 | 47.99 |
| Gabon                     | GAB | 2007 | 45.59 | 41.45 | 49.37 |
| Gabon                     | GAB | 2008 | 46.64 | 42.52 | 50.30 |
| Gabon                     | GAB | 2009 | 47.83 | 43.72 | 51.38 |
| Gabon                     | GAB | 2010 | 49.18 | 45.06 | 52.95 |
| Gabon                     | GAB | 2011 | 50.27 | 46.07 | 53.99 |
| Gabon                     | GAB | 2012 | 51.42 | 47.33 | 55.22 |
| Gabon                     | GAB | 2013 | 52.39 | 48.31 | 56.11 |
| Gabon                     | GAB | 2014 | 53.11 | 49.05 | 56.88 |
| Gabon                     | GAB | 2015 | 53.77 | 49.68 | 57.61 |
| Gabon                     | GAB | 2016 | 54.51 | 50.50 | 58.29 |
| Gabon                     | GAB | 2017 | 55.16 | 51.21 | 58.98 |
| United Kingdom            | GBR | 1990 | 75.13 | 73.17 | 76.76 |
| United Kingdom            | GBR | 1991 | 76.04 | 74.09 | 77.65 |
| United Kingdom            | GBR | 1992 | 76.94 | 74.97 | 78.55 |
| United Kingdom            | GBR | 1993 | 77.17 | 75.20 | 78.73 |
| United Kingdom            | GBR | 1994 | 78.17 | 76.21 | 79.70 |
| United Kingdom            | GBR | 1995 | 78.41 | 76.45 | 79.90 |
| United Kingdom            | GBR | 1996 | 79.46 | 77.53 | 80.93 |
| United Kingdom            | GBR | 1997 | 80.17 | 78.34 | 81.64 |
| United Kingdom            | GBR | 1998 | 80.55 | 78.79 | 82.02 |
| United Kingdom            | GBR | 1999 | 80.94 | 79.16 | 82.45 |
| United Kingdom            | GBR | 2000 | 81.61 | 79.78 | 83.09 |
| United Kingdom            | GBR | 2001 | 82.02 | 80.11 | 83.54 |
| United Kingdom            | GBR | 2002 | 82.17 | 80.30 | 83.73 |
| United Kingdom            | GBR | 2003 | 82.49 | 80.47 | 84.08 |
| United Kingdom            | GBR | 2004 | 83.28 | 81.16 | 84.99 |
| United Kingdom            | GBR | 2005 | 83.73 | 81.48 | 85.53 |
| United Kingdom            | GBR | 2006 | 84.10 | 81.71 | 85.93 |
| United Kingdom            | GBR | 2007 | 84.88 | 82.46 | 86.77 |
| United Kingdom            | GBR | 2008 | 85.28 | 82.69 | 87.26 |
| United Kingdom            | GBR | 2009 | 85.82 | 83.04 | 87.95 |
| United Kingdom            | GBR | 2010 | 86.33 | 83.44 | 88.53 |
| United Kingdom            | GBR | 2011 | 87.25 | 84.20 | 89.52 |
| United Kingdom            | GBR | 2012 | 88.07 | 84.92 | 90.41 |
| United Kingdom            | GBR | 2013 | 88.20 | 84.75 | 90.68 |
| United Kingdom            | GBR | 2014 | 88.41 | 84.58 | 91.12 |
| United Kingdom            | GBR | 2015 | 88.14 | 83.86 | 91.06 |
| United Kingdom            | GBR | 2016 | 87.78 | 82.89 | 90.98 |
| United Kingdom            | GBR | 2017 | 87.64 | 82.40 | 90.92 |
| Georgia                   | GEO | 1990 | 59.27 | 54.59 | 62.77 |
| Georgia                   | GEO | 1991 | 58.78 | 53.98 | 62.47 |
| Georgia                   | GEO | 1992 | 58.71 | 53.95 | 62.38 |
| Georgia                   | GEO | 1993 | 59.61 | 55.04 | 63.25 |

|         |     |      |       |       |       |
|---------|-----|------|-------|-------|-------|
| Georgia | GEO | 1994 | 59.71 | 55.41 | 63.23 |
| Georgia | GEO | 1995 | 61.94 | 57.79 | 65.20 |
| Georgia | GEO | 1996 | 63.34 | 58.92 | 66.56 |
| Georgia | GEO | 1997 | 64.09 | 60.06 | 67.29 |
| Georgia | GEO | 1998 | 64.20 | 60.55 | 67.27 |
| Georgia | GEO | 1999 | 64.61 | 61.00 | 67.59 |
| Georgia | GEO | 2000 | 64.21 | 60.51 | 67.27 |
| Georgia | GEO | 2001 | 63.46 | 59.43 | 66.53 |
| Georgia | GEO | 2002 | 61.12 | 56.67 | 64.26 |
| Georgia | GEO | 2003 | 59.99 | 54.47 | 63.49 |
| Georgia | GEO | 2004 | 59.51 | 52.26 | 63.68 |
| Georgia | GEO | 2005 | 58.18 | 46.50 | 63.55 |
| Georgia | GEO | 2006 | 57.55 | 46.40 | 63.63 |
| Georgia | GEO | 2007 | 56.79 | 46.28 | 63.56 |
| Georgia | GEO | 2008 | 55.69 | 45.54 | 62.67 |
| Georgia | GEO | 2009 | 55.27 | 44.89 | 62.21 |
| Georgia | GEO | 2010 | 55.95 | 45.13 | 62.88 |
| Georgia | GEO | 2011 | 56.29 | 45.46 | 63.53 |
| Georgia | GEO | 2012 | 56.85 | 45.70 | 64.22 |
| Georgia | GEO | 2013 | 57.37 | 46.06 | 64.92 |
| Georgia | GEO | 2014 | 58.01 | 46.56 | 65.83 |
| Georgia | GEO | 2015 | 57.49 | 46.59 | 65.92 |
| Georgia | GEO | 2016 | 56.35 | 46.23 | 65.34 |
| Georgia | GEO | 2017 | 55.93 | 46.10 | 65.50 |
| Ghana   | GHA | 1990 | 41.15 | 37.89 | 44.14 |
| Ghana   | GHA | 1991 | 41.87 | 38.62 | 44.72 |
| Ghana   | GHA | 1992 | 42.47 | 39.20 | 45.33 |
| Ghana   | GHA | 1993 | 43.28 | 40.11 | 46.20 |
| Ghana   | GHA | 1994 | 43.76 | 40.66 | 46.59 |
| Ghana   | GHA | 1995 | 44.15 | 41.14 | 47.03 |
| Ghana   | GHA | 1996 | 44.26 | 41.17 | 47.09 |
| Ghana   | GHA | 1997 | 44.25 | 41.30 | 47.00 |
| Ghana   | GHA | 1998 | 44.44 | 41.60 | 47.27 |
| Ghana   | GHA | 1999 | 44.48 | 41.58 | 47.40 |
| Ghana   | GHA | 2000 | 44.55 | 41.66 | 47.46 |
| Ghana   | GHA | 2001 | 44.91 | 42.04 | 47.64 |
| Ghana   | GHA | 2002 | 45.34 | 42.49 | 48.18 |
| Ghana   | GHA | 2003 | 46.42 | 43.52 | 49.26 |
| Ghana   | GHA | 2004 | 47.21 | 44.41 | 50.02 |
| Ghana   | GHA | 2005 | 47.62 | 44.74 | 50.50 |
| Ghana   | GHA | 2006 | 48.20 | 45.45 | 51.13 |
| Ghana   | GHA | 2007 | 49.16 | 46.41 | 52.03 |
| Ghana   | GHA | 2008 | 50.39 | 47.52 | 53.16 |
| Ghana   | GHA | 2009 | 51.34 | 48.51 | 54.09 |
| Ghana   | GHA | 2010 | 52.00 | 49.17 | 54.77 |
| Ghana   | GHA | 2011 | 52.82 | 50.07 | 55.54 |
| Ghana   | GHA | 2012 | 53.60 | 50.88 | 56.38 |
| Ghana   | GHA | 2013 | 54.34 | 51.48 | 57.19 |
| Ghana   | GHA | 2014 | 55.21 | 52.23 | 58.20 |
| Ghana   | GHA | 2015 | 55.68 | 52.65 | 58.68 |
| Ghana   | GHA | 2016 | 56.11 | 52.93 | 59.31 |
| Ghana   | GHA | 2017 | 57.08 | 53.84 | 60.33 |
| Guinea  | GIN | 1990 | 7.34  | 4.51  | 8.93  |
| Guinea  | GIN | 1991 | 7.45  | 4.53  | 8.99  |
| Guinea  | GIN | 1992 | 7.63  | 4.57  | 9.09  |
| Guinea  | GIN | 1993 | 7.86  | 4.60  | 9.76  |
| Guinea  | GIN | 1994 | 8.19  | 4.62  | 10.68 |
| Guinea  | GIN | 1995 | 8.68  | 4.67  | 11.47 |
| Guinea  | GIN | 1996 | 8.86  | 4.75  | 11.82 |
| Guinea  | GIN | 1997 | 9.65  | 4.85  | 12.50 |
| Guinea  | GIN | 1998 | 10.31 | 5.78  | 13.44 |
| Guinea  | GIN | 1999 | 11.16 | 5.87  | 14.54 |

|               |     |      |       |       |       |
|---------------|-----|------|-------|-------|-------|
| Guinea        | GIN | 2000 | 11.67 | 6.23  | 15.41 |
| Guinea        | GIN | 2001 | 14.87 | 8.63  | 17.92 |
| Guinea        | GIN | 2002 | 16.54 | 9.60  | 19.50 |
| Guinea        | GIN | 2003 | 17.66 | 10.00 | 20.72 |
| Guinea        | GIN | 2004 | 18.76 | 10.78 | 21.80 |
| Guinea        | GIN | 2005 | 20.00 | 15.83 | 22.84 |
| Guinea        | GIN | 2006 | 20.81 | 17.04 | 23.69 |
| Guinea        | GIN | 2007 | 21.44 | 17.47 | 24.34 |
| Guinea        | GIN | 2008 | 22.34 | 18.39 | 25.40 |
| Guinea        | GIN | 2009 | 22.92 | 19.12 | 25.92 |
| Guinea        | GIN | 2010 | 23.93 | 20.62 | 26.95 |
| Guinea        | GIN | 2011 | 24.61 | 21.38 | 27.65 |
| Guinea        | GIN | 2012 | 25.26 | 22.02 | 28.26 |
| Guinea        | GIN | 2013 | 25.46 | 22.15 | 28.60 |
| Guinea        | GIN | 2014 | 25.91 | 22.57 | 29.26 |
| Guinea        | GIN | 2015 | 26.35 | 23.07 | 29.78 |
| Guinea        | GIN | 2016 | 27.07 | 23.65 | 30.51 |
| Guinea        | GIN | 2017 | 28.05 | 24.64 | 31.54 |
| Gambia        | GMB | 1990 | 18.98 | 15.06 | 22.23 |
| Gambia        | GMB | 1991 | 20.56 | 16.56 | 23.71 |
| Gambia        | GMB | 1992 | 22.03 | 18.26 | 25.17 |
| Gambia        | GMB | 1993 | 23.30 | 19.70 | 26.43 |
| Gambia        | GMB | 1994 | 24.29 | 20.81 | 27.33 |
| Gambia        | GMB | 1995 | 25.21 | 21.77 | 28.28 |
| Gambia        | GMB | 1996 | 26.04 | 22.72 | 29.11 |
| Gambia        | GMB | 1997 | 26.79 | 23.44 | 29.84 |
| Gambia        | GMB | 1998 | 27.56 | 24.22 | 30.57 |
| Gambia        | GMB | 1999 | 28.34 | 25.01 | 31.31 |
| Gambia        | GMB | 2000 | 29.04 | 25.71 | 32.01 |
| Gambia        | GMB | 2001 | 29.54 | 26.19 | 32.48 |
| Gambia        | GMB | 2002 | 30.09 | 26.71 | 33.04 |
| Gambia        | GMB | 2003 | 30.66 | 27.31 | 33.54 |
| Gambia        | GMB | 2004 | 31.38 | 27.92 | 34.31 |
| Gambia        | GMB | 2005 | 32.45 | 29.17 | 35.53 |
| Gambia        | GMB | 2006 | 32.86 | 29.57 | 35.96 |
| Gambia        | GMB | 2007 | 33.27 | 30.06 | 36.38 |
| Gambia        | GMB | 2008 | 33.81 | 30.60 | 36.95 |
| Gambia        | GMB | 2009 | 34.31 | 31.16 | 37.36 |
| Gambia        | GMB | 2010 | 34.97 | 31.80 | 38.00 |
| Gambia        | GMB | 2011 | 35.47 | 32.18 | 38.59 |
| Gambia        | GMB | 2012 | 35.98 | 32.72 | 39.18 |
| Gambia        | GMB | 2013 | 36.52 | 33.24 | 39.74 |
| Gambia        | GMB | 2014 | 37.04 | 33.63 | 40.20 |
| Gambia        | GMB | 2015 | 37.55 | 34.06 | 40.78 |
| Gambia        | GMB | 2016 | 38.12 | 34.65 | 41.26 |
| Gambia        | GMB | 2017 | 38.82 | 35.38 | 42.03 |
| Guinea-Bissau | GNB | 1990 | 7.83  | 4.12  | 12.03 |
| Guinea-Bissau | GNB | 1991 | 8.43  | 4.63  | 12.35 |
| Guinea-Bissau | GNB | 1992 | 8.96  | 4.83  | 12.83 |
| Guinea-Bissau | GNB | 1993 | 9.44  | 5.20  | 13.19 |
| Guinea-Bissau | GNB | 1994 | 9.77  | 5.37  | 13.46 |
| Guinea-Bissau | GNB | 1995 | 10.28 | 5.51  | 13.77 |
| Guinea-Bissau | GNB | 1996 | 11.41 | 6.16  | 15.12 |
| Guinea-Bissau | GNB | 1997 | 12.47 | 6.74  | 16.30 |
| Guinea-Bissau | GNB | 1998 | 12.06 | 6.54  | 16.18 |
| Guinea-Bissau | GNB | 1999 | 13.16 | 7.26  | 17.01 |
| Guinea-Bissau | GNB | 2000 | 14.70 | 8.14  | 18.40 |
| Guinea-Bissau | GNB | 2001 | 16.26 | 8.91  | 19.88 |
| Guinea-Bissau | GNB | 2002 | 17.54 | 9.81  | 21.02 |
| Guinea-Bissau | GNB | 2003 | 18.55 | 13.08 | 21.95 |
| Guinea-Bissau | GNB | 2004 | 19.10 | 13.70 | 22.61 |
| Guinea-Bissau | GNB | 2005 | 19.96 | 15.12 | 23.59 |

|                   |     |      |       |       |       |
|-------------------|-----|------|-------|-------|-------|
| Guinea-Bissau     | GNB | 2006 | 20.54 | 15.95 | 23.98 |
| Guinea-Bissau     | GNB | 2007 | 21.55 | 17.20 | 25.08 |
| Guinea-Bissau     | GNB | 2008 | 22.70 | 18.57 | 26.19 |
| Guinea-Bissau     | GNB | 2009 | 23.83 | 19.77 | 27.27 |
| Guinea-Bissau     | GNB | 2010 | 25.08 | 21.12 | 28.59 |
| Guinea-Bissau     | GNB | 2011 | 26.35 | 22.55 | 29.84 |
| Guinea-Bissau     | GNB | 2012 | 27.37 | 23.55 | 30.88 |
| Guinea-Bissau     | GNB | 2013 | 28.42 | 24.33 | 31.99 |
| Guinea-Bissau     | GNB | 2014 | 29.38 | 25.23 | 32.94 |
| Guinea-Bissau     | GNB | 2015 | 30.36 | 26.18 | 33.94 |
| Guinea-Bissau     | GNB | 2016 | 31.27 | 27.18 | 34.97 |
| Guinea-Bissau     | GNB | 2017 | 32.31 | 28.27 | 35.99 |
| Equatorial Guinea | GNQ | 1990 | 6.87  | 4.42  | 9.67  |
| Equatorial Guinea | GNQ | 1991 | 7.15  | 4.46  | 10.99 |
| Equatorial Guinea | GNQ | 1992 | 7.52  | 4.54  | 11.87 |
| Equatorial Guinea | GNQ | 1993 | 7.78  | 4.58  | 12.33 |
| Equatorial Guinea | GNQ | 1994 | 8.22  | 4.63  | 13.38 |
| Equatorial Guinea | GNQ | 1995 | 8.52  | 4.83  | 13.70 |
| Equatorial Guinea | GNQ | 1996 | 9.11  | 5.58  | 14.76 |
| Equatorial Guinea | GNQ | 1997 | 13.27 | 7.23  | 23.19 |
| Equatorial Guinea | GNQ | 1998 | 16.57 | 7.96  | 26.03 |
| Equatorial Guinea | GNQ | 1999 | 19.84 | 10.36 | 28.81 |
| Equatorial Guinea | GNQ | 2000 | 22.72 | 12.41 | 30.82 |
| Equatorial Guinea | GNQ | 2001 | 25.42 | 14.31 | 33.67 |
| Equatorial Guinea | GNQ | 2002 | 27.53 | 19.39 | 36.05 |
| Equatorial Guinea | GNQ | 2003 | 27.74 | 20.58 | 36.80 |
| Equatorial Guinea | GNQ | 2004 | 28.62 | 22.51 | 37.33 |
| Equatorial Guinea | GNQ | 2005 | 29.28 | 23.44 | 37.46 |
| Equatorial Guinea | GNQ | 2006 | 29.56 | 23.76 | 37.47 |
| Equatorial Guinea | GNQ | 2007 | 30.75 | 25.07 | 37.91 |
| Equatorial Guinea | GNQ | 2008 | 32.10 | 26.58 | 39.24 |
| Equatorial Guinea | GNQ | 2009 | 32.98 | 27.27 | 40.97 |
| Equatorial Guinea | GNQ | 2010 | 34.08 | 27.93 | 43.25 |
| Equatorial Guinea | GNQ | 2011 | 35.75 | 28.98 | 46.26 |
| Equatorial Guinea | GNQ | 2012 | 36.55 | 29.83 | 47.36 |
| Equatorial Guinea | GNQ | 2013 | 36.94 | 30.41 | 47.80 |
| Equatorial Guinea | GNQ | 2014 | 37.12 | 30.79 | 47.51 |
| Equatorial Guinea | GNQ | 2015 | 37.28 | 31.23 | 46.69 |
| Equatorial Guinea | GNQ | 2016 | 37.72 | 32.08 | 45.50 |
| Equatorial Guinea | GNQ | 2017 | 38.38 | 32.73 | 46.05 |
| Greece            | GRC | 1990 | 74.48 | 71.47 | 76.46 |
| Greece            | GRC | 1991 | 74.57 | 71.41 | 76.70 |
| Greece            | GRC | 1992 | 74.56 | 71.23 | 76.81 |
| Greece            | GRC | 1993 | 75.12 | 71.63 | 77.44 |
| Greece            | GRC | 1994 | 75.48 | 71.83 | 77.85 |
| Greece            | GRC | 1995 | 75.69 | 72.01 | 78.13 |
| Greece            | GRC | 1996 | 76.53 | 72.52 | 79.09 |
| Greece            | GRC | 1997 | 77.09 | 72.70 | 79.83 |
| Greece            | GRC | 1998 | 77.12 | 72.47 | 80.06 |
| Greece            | GRC | 1999 | 77.12 | 71.95 | 80.21 |
| Greece            | GRC | 2000 | 77.46 | 71.91 | 80.79 |
| Greece            | GRC | 2001 | 77.67 | 71.92 | 81.18 |
| Greece            | GRC | 2002 | 77.78 | 71.16 | 81.58 |
| Greece            | GRC | 2003 | 77.76 | 70.87 | 81.85 |
| Greece            | GRC | 2004 | 77.19 | 68.98 | 81.74 |
| Greece            | GRC | 2005 | 77.32 | 67.99 | 82.12 |
| Greece            | GRC | 2006 | 77.68 | 67.16 | 82.70 |
| Greece            | GRC | 2007 | 77.40 | 66.43 | 82.53 |
| Greece            | GRC | 2008 | 77.89 | 65.40 | 83.29 |
| Greece            | GRC | 2009 | 77.36 | 59.48 | 83.33 |
| Greece            | GRC | 2010 | 77.66 | 58.08 | 83.67 |
| Greece            | GRC | 2011 | 77.67 | 58.12 | 83.55 |

|           |     |      |       |       |       |
|-----------|-----|------|-------|-------|-------|
| Greece    | GRC | 2012 | 77.78 | 60.64 | 83.61 |
| Greece    | GRC | 2013 | 78.61 | 63.03 | 84.48 |
| Greece    | GRC | 2014 | 79.07 | 64.78 | 84.87 |
| Greece    | GRC | 2015 | 79.33 | 66.45 | 85.00 |
| Greece    | GRC | 2016 | 79.73 | 67.39 | 85.25 |
| Greece    | GRC | 2017 | 79.84 | 66.52 | 85.55 |
| Grenada   | GRD | 1990 | 47.08 | 44.35 | 49.46 |
| Grenada   | GRD | 1991 | 48.51 | 45.80 | 50.92 |
| Grenada   | GRD | 1992 | 49.70 | 47.08 | 52.11 |
| Grenada   | GRD | 1993 | 50.96 | 48.39 | 53.28 |
| Grenada   | GRD | 1994 | 52.05 | 49.49 | 54.37 |
| Grenada   | GRD | 1995 | 53.37 | 50.83 | 55.64 |
| Grenada   | GRD | 1996 | 54.84 | 52.31 | 57.07 |
| Grenada   | GRD | 1997 | 56.07 | 53.54 | 58.33 |
| Grenada   | GRD | 1998 | 57.26 | 54.70 | 59.56 |
| Grenada   | GRD | 1999 | 58.59 | 56.03 | 60.89 |
| Grenada   | GRD | 2000 | 59.58 | 57.16 | 61.88 |
| Grenada   | GRD | 2001 | 60.31 | 57.78 | 62.61 |
| Grenada   | GRD | 2002 | 60.82 | 58.25 | 63.20 |
| Grenada   | GRD | 2003 | 61.41 | 58.86 | 63.73 |
| Grenada   | GRD | 2004 | 61.84 | 59.33 | 64.17 |
| Grenada   | GRD | 2005 | 62.35 | 59.81 | 64.73 |
| Grenada   | GRD | 2006 | 62.83 | 60.20 | 65.22 |
| Grenada   | GRD | 2007 | 63.24 | 60.69 | 65.64 |
| Grenada   | GRD | 2008 | 63.61 | 61.00 | 66.05 |
| Grenada   | GRD | 2009 | 63.96 | 61.29 | 66.37 |
| Grenada   | GRD | 2010 | 64.21 | 61.48 | 66.57 |
| Grenada   | GRD | 2011 | 64.32 | 61.73 | 66.74 |
| Grenada   | GRD | 2012 | 64.35 | 61.80 | 66.85 |
| Grenada   | GRD | 2013 | 64.51 | 61.95 | 67.04 |
| Grenada   | GRD | 2014 | 64.55 | 61.98 | 67.07 |
| Grenada   | GRD | 2015 | 64.78 | 62.14 | 67.25 |
| Grenada   | GRD | 2016 | 65.10 | 62.36 | 67.58 |
| Grenada   | GRD | 2017 | 65.43 | 62.65 | 67.96 |
| Greenland | GRL | 1990 | 58.21 | 55.25 | 60.93 |
| Greenland | GRL | 1991 | 58.85 | 55.95 | 61.51 |
| Greenland | GRL | 1992 | 59.73 | 56.89 | 62.32 |
| Greenland | GRL | 1993 | 60.55 | 57.79 | 63.18 |
| Greenland | GRL | 1994 | 61.43 | 58.80 | 63.91 |
| Greenland | GRL | 1995 | 62.16 | 59.60 | 64.57 |
| Greenland | GRL | 1996 | 63.31 | 60.86 | 65.71 |
| Greenland | GRL | 1997 | 64.01 | 61.55 | 66.31 |
| Greenland | GRL | 1998 | 64.56 | 62.10 | 66.88 |
| Greenland | GRL | 1999 | 65.15 | 62.64 | 67.44 |
| Greenland | GRL | 2000 | 65.66 | 63.12 | 67.96 |
| Greenland | GRL | 2001 | 66.41 | 63.90 | 68.69 |
| Greenland | GRL | 2002 | 67.05 | 64.46 | 69.34 |
| Greenland | GRL | 2003 | 67.56 | 64.86 | 69.85 |
| Greenland | GRL | 2004 | 68.42 | 65.72 | 70.70 |
| Greenland | GRL | 2005 | 69.22 | 66.38 | 71.47 |
| Greenland | GRL | 2006 | 70.04 | 67.07 | 72.36 |
| Greenland | GRL | 2007 | 70.71 | 67.60 | 73.08 |
| Greenland | GRL | 2008 | 71.43 | 68.32 | 73.82 |
| Greenland | GRL | 2009 | 71.98 | 68.79 | 74.45 |
| Greenland | GRL | 2010 | 72.55 | 69.24 | 75.12 |
| Greenland | GRL | 2011 | 73.22 | 69.71 | 75.79 |
| Greenland | GRL | 2012 | 73.70 | 70.02 | 76.48 |
| Greenland | GRL | 2013 | 74.18 | 70.66 | 76.94 |
| Greenland | GRL | 2014 | 74.56 | 71.01 | 77.43 |
| Greenland | GRL | 2015 | 74.07 | 70.57 | 76.98 |
| Greenland | GRL | 2016 | 74.58 | 71.07 | 77.56 |
| Greenland | GRL | 2017 | 74.93 | 71.37 | 78.03 |

|           |     |      |       |       |       |
|-----------|-----|------|-------|-------|-------|
| Guatemala | GTM | 1990 | 33.66 | 17.81 | 37.94 |
| Guatemala | GTM | 1991 | 33.45 | 17.66 | 37.50 |
| Guatemala | GTM | 1992 | 33.83 | 17.72 | 37.55 |
| Guatemala | GTM | 1993 | 34.95 | 18.17 | 38.41 |
| Guatemala | GTM | 1994 | 35.99 | 29.89 | 39.19 |
| Guatemala | GTM | 1995 | 39.18 | 34.32 | 42.38 |
| Guatemala | GTM | 1996 | 41.16 | 36.69 | 44.38 |
| Guatemala | GTM | 1997 | 41.59 | 37.96 | 44.51 |
| Guatemala | GTM | 1998 | 42.33 | 38.87 | 45.12 |
| Guatemala | GTM | 1999 | 44.30 | 41.17 | 46.93 |
| Guatemala | GTM | 2000 | 45.07 | 42.04 | 47.66 |
| Guatemala | GTM | 2001 | 47.14 | 44.20 | 49.69 |
| Guatemala | GTM | 2002 | 48.42 | 45.44 | 51.05 |
| Guatemala | GTM | 2003 | 49.24 | 46.36 | 51.80 |
| Guatemala | GTM | 2004 | 50.06 | 47.23 | 52.59 |
| Guatemala | GTM | 2005 | 50.67 | 47.88 | 53.17 |
| Guatemala | GTM | 2006 | 51.58 | 48.79 | 54.10 |
| Guatemala | GTM | 2007 | 53.04 | 50.32 | 55.56 |
| Guatemala | GTM | 2008 | 54.35 | 51.58 | 56.86 |
| Guatemala | GTM | 2009 | 54.53 | 51.88 | 56.95 |
| Guatemala | GTM | 2010 | 55.41 | 52.85 | 57.83 |
| Guatemala | GTM | 2011 | 56.27 | 53.68 | 58.75 |
| Guatemala | GTM | 2012 | 56.86 | 54.33 | 59.25 |
| Guatemala | GTM | 2013 | 57.60 | 55.11 | 60.11 |
| Guatemala | GTM | 2014 | 57.75 | 55.26 | 60.19 |
| Guatemala | GTM | 2015 | 58.16 | 55.67 | 60.59 |
| Guatemala | GTM | 2016 | 58.17 | 55.57 | 60.76 |
| Guatemala | GTM | 2017 | 58.61 | 55.66 | 61.62 |
| Guam      | GUM | 1990 | 64.72 | 58.85 | 68.60 |
| Guam      | GUM | 1991 | 63.92 | 57.56 | 68.00 |
| Guam      | GUM | 1992 | 63.08 | 55.71 | 67.51 |
| Guam      | GUM | 1993 | 62.29 | 53.46 | 67.11 |
| Guam      | GUM | 1994 | 61.39 | 47.74 | 66.66 |
| Guam      | GUM | 1995 | 60.66 | 45.84 | 66.61 |
| Guam      | GUM | 1996 | 59.38 | 45.55 | 66.31 |
| Guam      | GUM | 1997 | 58.01 | 45.62 | 66.08 |
| Guam      | GUM | 1998 | 56.11 | 45.54 | 65.65 |
| Guam      | GUM | 1999 | 54.29 | 45.63 | 65.14 |
| Guam      | GUM | 2000 | 52.67 | 45.84 | 64.56 |
| Guam      | GUM | 2001 | 51.45 | 45.83 | 63.92 |
| Guam      | GUM | 2002 | 50.81 | 45.96 | 63.45 |
| Guam      | GUM | 2003 | 50.45 | 45.97 | 63.14 |
| Guam      | GUM | 2004 | 50.03 | 45.84 | 62.70 |
| Guam      | GUM | 2005 | 49.65 | 45.76 | 62.40 |
| Guam      | GUM | 2006 | 49.06 | 45.58 | 62.04 |
| Guam      | GUM | 2007 | 48.47 | 45.41 | 61.28 |
| Guam      | GUM | 2008 | 47.76 | 45.17 | 59.82 |
| Guam      | GUM | 2009 | 47.26 | 45.03 | 58.67 |
| Guam      | GUM | 2010 | 47.19 | 45.27 | 56.12 |
| Guam      | GUM | 2011 | 46.87 | 45.10 | 52.79 |
| Guam      | GUM | 2012 | 46.69 | 45.06 | 48.53 |
| Guam      | GUM | 2013 | 46.76 | 45.22 | 48.09 |
| Guam      | GUM | 2014 | 46.69 | 45.14 | 48.08 |
| Guam      | GUM | 2015 | 46.52 | 44.87 | 47.97 |
| Guam      | GUM | 2016 | 46.48 | 44.75 | 48.00 |
| Guam      | GUM | 2017 | 46.59 | 44.77 | 48.20 |
| Guyana    | GUY | 1990 | 39.21 | 36.82 | 41.44 |
| Guyana    | GUY | 1991 | 40.93 | 38.71 | 43.08 |
| Guyana    | GUY | 1992 | 43.32 | 41.04 | 45.35 |
| Guyana    | GUY | 1993 | 43.45 | 41.11 | 45.47 |
| Guyana    | GUY | 1994 | 44.20 | 41.89 | 46.17 |
| Guyana    | GUY | 1995 | 43.29 | 40.97 | 45.29 |

|          |     |      |       |       |       |
|----------|-----|------|-------|-------|-------|
| Guyana   | GUY | 1996 | 42.80 | 40.60 | 44.73 |
| Guyana   | GUY | 1997 | 43.56 | 41.43 | 45.49 |
| Guyana   | GUY | 1998 | 44.35 | 42.14 | 46.27 |
| Guyana   | GUY | 1999 | 45.91 | 43.72 | 47.87 |
| Guyana   | GUY | 2000 | 44.81 | 42.51 | 46.82 |
| Guyana   | GUY | 2001 | 46.17 | 43.84 | 48.14 |
| Guyana   | GUY | 2002 | 46.95 | 44.70 | 48.91 |
| Guyana   | GUY | 2003 | 48.60 | 46.37 | 50.56 |
| Guyana   | GUY | 2004 | 49.40 | 47.22 | 51.31 |
| Guyana   | GUY | 2005 | 49.36 | 47.24 | 51.30 |
| Guyana   | GUY | 2006 | 50.50 | 48.41 | 52.44 |
| Guyana   | GUY | 2007 | 51.67 | 49.58 | 53.61 |
| Guyana   | GUY | 2008 | 52.98 | 50.93 | 54.86 |
| Guyana   | GUY | 2009 | 54.17 | 52.11 | 56.12 |
| Guyana   | GUY | 2010 | 53.08 | 50.99 | 55.05 |
| Guyana   | GUY | 2011 | 52.18 | 49.93 | 54.17 |
| Guyana   | GUY | 2012 | 52.11 | 49.87 | 54.13 |
| Guyana   | GUY | 2013 | 53.32 | 51.06 | 55.40 |
| Guyana   | GUY | 2014 | 54.07 | 51.61 | 56.38 |
| Guyana   | GUY | 2015 | 54.84 | 52.06 | 57.47 |
| Guyana   | GUY | 2016 | 55.52 | 52.38 | 58.47 |
| Guyana   | GUY | 2017 | 56.16 | 52.56 | 59.52 |
| Honduras | HND | 1990 | 20.29 | 19.33 | 21.01 |
| Honduras | HND | 1991 | 20.87 | 19.78 | 21.58 |
| Honduras | HND | 1992 | 20.91 | 19.63 | 22.54 |
| Honduras | HND | 1993 | 21.20 | 19.75 | 33.46 |
| Honduras | HND | 1994 | 21.57 | 20.01 | 35.79 |
| Honduras | HND | 1995 | 21.39 | 19.63 | 36.53 |
| Honduras | HND | 1996 | 21.87 | 19.75 | 37.88 |
| Honduras | HND | 1997 | 22.42 | 19.95 | 39.02 |
| Honduras | HND | 1998 | 22.97 | 20.18 | 41.11 |
| Honduras | HND | 1999 | 24.05 | 20.34 | 42.46 |
| Honduras | HND | 2000 | 24.85 | 20.59 | 43.35 |
| Honduras | HND | 2001 | 25.63 | 20.83 | 44.10 |
| Honduras | HND | 2002 | 26.83 | 21.44 | 45.65 |
| Honduras | HND | 2003 | 28.31 | 21.68 | 46.80 |
| Honduras | HND | 2004 | 30.02 | 21.95 | 48.13 |
| Honduras | HND | 2005 | 32.08 | 22.24 | 49.12 |
| Honduras | HND | 2006 | 33.86 | 22.56 | 50.21 |
| Honduras | HND | 2007 | 36.04 | 22.89 | 51.11 |
| Honduras | HND | 2008 | 38.31 | 23.32 | 52.37 |
| Honduras | HND | 2009 | 39.82 | 23.57 | 53.30 |
| Honduras | HND | 2010 | 41.31 | 23.89 | 54.00 |
| Honduras | HND | 2011 | 42.21 | 24.10 | 54.66 |
| Honduras | HND | 2012 | 43.75 | 24.26 | 55.26 |
| Honduras | HND | 2013 | 44.53 | 24.43 | 55.66 |
| Honduras | HND | 2014 | 45.10 | 24.59 | 56.02 |
| Honduras | HND | 2015 | 46.06 | 24.84 | 56.53 |
| Honduras | HND | 2016 | 47.21 | 25.11 | 57.16 |
| Honduras | HND | 2017 | 48.35 | 25.29 | 57.69 |
| Croatia  | HRV | 1990 | 65.88 | 62.82 | 68.32 |
| Croatia  | HRV | 1991 | 66.43 | 63.26 | 68.98 |
| Croatia  | HRV | 1992 | 66.63 | 63.31 | 69.24 |
| Croatia  | HRV | 1993 | 66.97 | 63.90 | 69.45 |
| Croatia  | HRV | 1994 | 67.30 | 64.12 | 69.80 |
| Croatia  | HRV | 1995 | 67.35 | 64.13 | 69.88 |
| Croatia  | HRV | 1996 | 67.58 | 64.16 | 70.13 |
| Croatia  | HRV | 1997 | 67.21 | 63.55 | 69.76 |
| Croatia  | HRV | 1998 | 68.03 | 64.09 | 70.70 |
| Croatia  | HRV | 1999 | 68.36 | 63.95 | 71.30 |
| Croatia  | HRV | 2000 | 69.33 | 64.33 | 72.60 |
| Croatia  | HRV | 2001 | 70.30 | 65.16 | 73.51 |

|         |     |      |       |       |       |
|---------|-----|------|-------|-------|-------|
| Croatia | HRV | 2002 | 70.43 | 64.49 | 73.89 |
| Croatia | HRV | 2003 | 70.30 | 63.28 | 74.14 |
| Croatia | HRV | 2004 | 70.87 | 62.23 | 75.27 |
| Croatia | HRV | 2005 | 70.24 | 58.79 | 75.21 |
| Croatia | HRV | 2006 | 70.45 | 54.92 | 75.85 |
| Croatia | HRV | 2007 | 70.43 | 55.53 | 75.83 |
| Croatia | HRV | 2008 | 70.30 | 54.39 | 75.95 |
| Croatia | HRV | 2009 | 71.58 | 54.90 | 77.41 |
| Croatia | HRV | 2010 | 71.97 | 53.65 | 78.08 |
| Croatia | HRV | 2011 | 72.24 | 53.99 | 78.56 |
| Croatia | HRV | 2012 | 72.62 | 54.39 | 79.09 |
| Croatia | HRV | 2013 | 73.52 | 55.18 | 80.24 |
| Croatia | HRV | 2014 | 73.33 | 55.12 | 80.13 |
| Croatia | HRV | 2015 | 72.84 | 54.90 | 79.72 |
| Croatia | HRV | 2016 | 73.90 | 55.81 | 81.08 |
| Croatia | HRV | 2017 | 74.23 | 56.15 | 81.86 |
| Haiti   | HTI | 1990 | 12.45 | 8.94  | 17.35 |
| Haiti   | HTI | 1991 | 13.09 | 8.83  | 17.95 |
| Haiti   | HTI | 1992 | 14.26 | 9.48  | 18.86 |
| Haiti   | HTI | 1993 | 14.66 | 9.81  | 19.30 |
| Haiti   | HTI | 1994 | 15.38 | 10.09 | 19.81 |
| Haiti   | HTI | 1995 | 17.08 | 11.45 | 21.48 |
| Haiti   | HTI | 1996 | 18.96 | 13.15 | 23.11 |
| Haiti   | HTI | 1997 | 20.45 | 15.16 | 24.45 |
| Haiti   | HTI | 1998 | 21.87 | 17.00 | 25.82 |
| Haiti   | HTI | 1999 | 23.04 | 18.09 | 27.01 |
| Haiti   | HTI | 2000 | 24.12 | 19.28 | 28.08 |
| Haiti   | HTI | 2001 | 25.93 | 21.15 | 30.19 |
| Haiti   | HTI | 2002 | 27.16 | 22.40 | 31.26 |
| Haiti   | HTI | 2003 | 28.26 | 23.47 | 32.50 |
| Haiti   | HTI | 2004 | 29.14 | 24.58 | 33.56 |
| Haiti   | HTI | 2005 | 30.15 | 25.53 | 34.56 |
| Haiti   | HTI | 2006 | 31.17 | 26.42 | 35.52 |
| Haiti   | HTI | 2007 | 32.11 | 27.07 | 36.61 |
| Haiti   | HTI | 2008 | 33.09 | 28.01 | 37.84 |
| Haiti   | HTI | 2009 | 34.06 | 29.00 | 38.73 |
| Haiti   | HTI | 2010 | 34.85 | 29.65 | 39.73 |
| Haiti   | HTI | 2011 | 35.81 | 30.53 | 40.77 |
| Haiti   | HTI | 2012 | 36.83 | 31.54 | 41.98 |
| Haiti   | HTI | 2013 | 37.79 | 32.40 | 43.03 |
| Haiti   | HTI | 2014 | 38.53 | 33.00 | 43.70 |
| Haiti   | HTI | 2015 | 39.37 | 33.72 | 44.54 |
| Haiti   | HTI | 2016 | 40.16 | 34.78 | 45.34 |
| Haiti   | HTI | 2017 | 40.95 | 35.80 | 46.04 |
| Hungary | HUN | 1990 | 55.21 | 51.76 | 57.76 |
| Hungary | HUN | 1991 | 55.62 | 52.17 | 58.26 |
| Hungary | HUN | 1992 | 54.07 | 50.54 | 56.85 |
| Hungary | HUN | 1993 | 53.85 | 50.18 | 56.75 |
| Hungary | HUN | 1994 | 55.07 | 51.16 | 57.97 |
| Hungary | HUN | 1995 | 56.08 | 51.84 | 59.10 |
| Hungary | HUN | 1996 | 58.19 | 53.31 | 61.37 |
| Hungary | HUN | 1997 | 59.03 | 53.48 | 62.27 |
| Hungary | HUN | 1998 | 58.46 | 52.79 | 61.87 |
| Hungary | HUN | 1999 | 58.43 | 51.88 | 62.04 |
| Hungary | HUN | 2000 | 60.08 | 52.51 | 63.98 |
| Hungary | HUN | 2001 | 61.80 | 54.64 | 65.59 |
| Hungary | HUN | 2002 | 61.97 | 54.48 | 65.87 |
| Hungary | HUN | 2003 | 61.86 | 54.37 | 65.88 |
| Hungary | HUN | 2004 | 62.17 | 53.48 | 66.48 |
| Hungary | HUN | 2005 | 61.60 | 50.59 | 66.21 |
| Hungary | HUN | 2006 | 62.37 | 51.55 | 67.01 |
| Hungary | HUN | 2007 | 62.96 | 53.01 | 67.36 |



|           |     |      |       |       |       |
|-----------|-----|------|-------|-------|-------|
| Hungary   | HUN | 2008 | 64.45 | 55.82 | 68.69 |
| Hungary   | HUN | 2009 | 65.21 | 57.58 | 69.24 |
| Hungary   | HUN | 2010 | 65.93 | 57.55 | 70.10 |
| Hungary   | HUN | 2011 | 66.43 | 58.34 | 70.82 |
| Hungary   | HUN | 2012 | 67.02 | 59.09 | 71.34 |
| Hungary   | HUN | 2013 | 67.88 | 59.33 | 72.36 |
| Hungary   | HUN | 2014 | 68.19 | 58.63 | 72.71 |
| Hungary   | HUN | 2015 | 66.98 | 56.15 | 71.50 |
| Hungary   | HUN | 2016 | 68.50 | 55.08 | 73.40 |
| Hungary   | HUN | 2017 | 69.17 | 56.52 | 74.51 |
| Indonesia | IDN | 1990 | 31.44 | 27.95 | 34.12 |
| Indonesia | IDN | 1991 | 33.15 | 30.26 | 35.67 |
| Indonesia | IDN | 1992 | 34.58 | 31.91 | 36.95 |
| Indonesia | IDN | 1993 | 35.76 | 33.15 | 38.05 |
| Indonesia | IDN | 1994 | 36.87 | 34.33 | 39.11 |
| Indonesia | IDN | 1995 | 37.89 | 35.32 | 40.09 |
| Indonesia | IDN | 1996 | 38.84 | 36.39 | 41.01 |
| Indonesia | IDN | 1997 | 39.67 | 37.28 | 41.82 |
| Indonesia | IDN | 1998 | 40.27 | 37.94 | 42.40 |
| Indonesia | IDN | 1999 | 40.68 | 38.48 | 42.73 |
| Indonesia | IDN | 2000 | 41.00 | 38.81 | 43.05 |
| Indonesia | IDN | 2001 | 41.34 | 39.15 | 43.36 |
| Indonesia | IDN | 2002 | 41.62 | 39.38 | 43.64 |
| Indonesia | IDN | 2003 | 41.99 | 39.69 | 44.01 |
| Indonesia | IDN | 2004 | 42.45 | 40.14 | 44.48 |
| Indonesia | IDN | 2005 | 43.51 | 41.29 | 45.59 |
| Indonesia | IDN | 2006 | 44.25 | 42.10 | 46.29 |
| Indonesia | IDN | 2007 | 44.92 | 42.74 | 46.93 |
| Indonesia | IDN | 2008 | 45.58 | 43.41 | 47.56 |
| Indonesia | IDN | 2009 | 46.31 | 44.13 | 48.34 |
| Indonesia | IDN | 2010 | 47.22 | 45.04 | 49.29 |
| Indonesia | IDN | 2011 | 48.02 | 45.81 | 50.08 |
| Indonesia | IDN | 2012 | 48.76 | 46.57 | 50.85 |
| Indonesia | IDN | 2013 | 49.47 | 47.20 | 51.67 |
| Indonesia | IDN | 2014 | 50.23 | 47.92 | 52.51 |
| Indonesia | IDN | 2015 | 50.89 | 48.56 | 53.17 |
| Indonesia | IDN | 2016 | 51.76 | 49.37 | 54.08 |
| Indonesia | IDN | 2017 | 52.67 | 50.23 | 55.04 |
| India     | IND | 1990 | 16.61 | 9.54  | 19.37 |
| India     | IND | 1991 | 17.41 | 9.76  | 19.74 |
| India     | IND | 1992 | 18.18 | 13.53 | 20.20 |
| India     | IND | 1993 | 19.11 | 16.60 | 20.88 |
| India     | IND | 1994 | 19.93 | 17.83 | 21.62 |
| India     | IND | 1995 | 20.76 | 18.85 | 22.29 |
| India     | IND | 1996 | 21.27 | 19.54 | 22.77 |
| India     | IND | 1997 | 21.27 | 19.70 | 22.69 |
| India     | IND | 1998 | 21.80 | 20.33 | 23.17 |
| India     | IND | 1999 | 22.79 | 21.37 | 24.09 |
| India     | IND | 2000 | 23.76 | 22.35 | 25.73 |
| India     | IND | 2001 | 25.21 | 23.38 | 28.04 |
| India     | IND | 2002 | 27.39 | 24.50 | 29.96 |
| India     | IND | 2003 | 29.73 | 26.28 | 31.93 |
| India     | IND | 2004 | 32.41 | 29.67 | 34.40 |
| India     | IND | 2005 | 34.01 | 31.78 | 35.83 |
| India     | IND | 2006 | 35.16 | 33.20 | 36.82 |
| India     | IND | 2007 | 36.09 | 34.32 | 37.72 |
| India     | IND | 2008 | 37.01 | 35.33 | 38.62 |
| India     | IND | 2009 | 37.93 | 36.36 | 39.53 |
| India     | IND | 2010 | 38.62 | 37.03 | 40.23 |
| India     | IND | 2011 | 39.37 | 37.78 | 41.01 |
| India     | IND | 2012 | 40.20 | 38.63 | 41.81 |
| India     | IND | 2013 | 41.08 | 39.42 | 42.74 |

|                            |     |      |       |       |       |
|----------------------------|-----|------|-------|-------|-------|
| India                      | IND | 2014 | 41.99 | 40.31 | 43.61 |
| India                      | IND | 2015 | 42.80 | 40.99 | 44.48 |
| India                      | IND | 2016 | 43.44 | 41.57 | 45.14 |
| India                      | IND | 2017 | 44.36 | 42.43 | 46.16 |
| Ireland                    | IRL | 1990 | 70.04 | 67.18 | 72.33 |
| Ireland                    | IRL | 1991 | 70.95 | 67.88 | 73.24 |
| Ireland                    | IRL | 1992 | 71.66 | 68.45 | 73.97 |
| Ireland                    | IRL | 1993 | 72.09 | 68.69 | 74.47 |
| Ireland                    | IRL | 1994 | 73.00 | 69.43 | 75.41 |
| Ireland                    | IRL | 1995 | 73.22 | 69.43 | 75.72 |
| Ireland                    | IRL | 1996 | 74.72 | 70.79 | 77.31 |
| Ireland                    | IRL | 1997 | 75.16 | 71.15 | 77.89 |
| Ireland                    | IRL | 1998 | 75.70 | 71.56 | 78.44 |
| Ireland                    | IRL | 1999 | 76.02 | 71.77 | 79.00 |
| Ireland                    | IRL | 2000 | 76.47 | 71.67 | 79.65 |
| Ireland                    | IRL | 2001 | 77.38 | 71.76 | 80.93 |
| Ireland                    | IRL | 2002 | 78.00 | 71.78 | 81.98 |
| Ireland                    | IRL | 2003 | 78.86 | 72.05 | 83.07 |
| Ireland                    | IRL | 2004 | 79.31 | 71.85 | 83.75 |
| Ireland                    | IRL | 2005 | 80.25 | 72.58 | 84.91 |
| Ireland                    | IRL | 2006 | 80.92 | 73.08 | 85.67 |
| Ireland                    | IRL | 2007 | 81.79 | 74.02 | 86.55 |
| Ireland                    | IRL | 2008 | 82.11 | 73.96 | 86.95 |
| Ireland                    | IRL | 2009 | 82.23 | 73.79 | 87.26 |
| Ireland                    | IRL | 2010 | 83.84 | 74.86 | 89.01 |
| Ireland                    | IRL | 2011 | 83.97 | 74.98 | 89.25 |
| Ireland                    | IRL | 2012 | 84.36 | 75.58 | 89.68 |
| Ireland                    | IRL | 2013 | 84.97 | 75.89 | 90.27 |
| Ireland                    | IRL | 2014 | 85.36 | 75.73 | 90.73 |
| Ireland                    | IRL | 2015 | 85.33 | 74.88 | 90.99 |
| Ireland                    | IRL | 2016 | 85.10 | 73.34 | 91.04 |
| Ireland                    | IRL | 2017 | 84.87 | 72.82 | 91.08 |
| Iran (Islamic Republic of) | IRN | 1990 | 40.38 | 38.14 | 42.57 |
| Iran (Islamic Republic of) | IRN | 1991 | 41.85 | 39.46 | 44.03 |
| Iran (Islamic Republic of) | IRN | 1992 | 43.40 | 41.00 | 45.54 |
| Iran (Islamic Republic of) | IRN | 1993 | 45.08 | 42.75 | 47.21 |
| Iran (Islamic Republic of) | IRN | 1994 | 46.60 | 44.21 | 48.66 |
| Iran (Islamic Republic of) | IRN | 1995 | 48.06 | 45.83 | 50.12 |
| Iran (Islamic Republic of) | IRN | 1996 | 49.63 | 47.54 | 51.65 |
| Iran (Islamic Republic of) | IRN | 1997 | 51.33 | 49.28 | 53.32 |
| Iran (Islamic Republic of) | IRN | 1998 | 52.73 | 50.69 | 54.64 |
| Iran (Islamic Republic of) | IRN | 1999 | 53.96 | 51.95 | 55.84 |
| Iran (Islamic Republic of) | IRN | 2000 | 55.19 | 53.22 | 56.93 |
| Iran (Islamic Republic of) | IRN | 2001 | 56.50 | 54.64 | 58.17 |
| Iran (Islamic Republic of) | IRN | 2002 | 57.68 | 55.96 | 59.26 |
| Iran (Islamic Republic of) | IRN | 2003 | 58.86 | 57.16 | 60.38 |
| Iran (Islamic Republic of) | IRN | 2004 | 59.62 | 57.49 | 61.27 |
| Iran (Islamic Republic of) | IRN | 2005 | 60.24 | 57.83 | 62.08 |
| Iran (Islamic Republic of) | IRN | 2006 | 60.67 | 58.00 | 62.67 |
| Iran (Islamic Republic of) | IRN | 2007 | 61.43 | 58.41 | 63.56 |
| Iran (Islamic Republic of) | IRN | 2008 | 61.77 | 58.45 | 64.09 |
| Iran (Islamic Republic of) | IRN | 2009 | 62.33 | 58.86 | 64.80 |
| Iran (Islamic Republic of) | IRN | 2010 | 63.20 | 59.41 | 65.81 |
| Iran (Islamic Republic of) | IRN | 2011 | 63.75 | 59.72 | 66.47 |
| Iran (Islamic Republic of) | IRN | 2012 | 64.21 | 60.06 | 66.97 |
| Iran (Islamic Republic of) | IRN | 2013 | 64.57 | 60.32 | 67.46 |
| Iran (Islamic Republic of) | IRN | 2014 | 65.10 | 60.53 | 68.14 |
| Iran (Islamic Republic of) | IRN | 2015 | 65.80 | 60.79 | 68.89 |
| Iran (Islamic Republic of) | IRN | 2016 | 66.81 | 61.71 | 70.04 |
| Iran (Islamic Republic of) | IRN | 2017 | 67.70 | 62.33 | 71.12 |
| Iraq                       | IRQ | 1990 | 32.35 | 28.45 | 35.87 |
| Iraq                       | IRQ | 1991 | 31.92 | 27.91 | 35.50 |

|         |     |      |       |       |       |
|---------|-----|------|-------|-------|-------|
| Iraq    | IRQ | 1992 | 31.90 | 27.70 | 35.46 |
| Iraq    | IRQ | 1993 | 31.93 | 27.65 | 35.62 |
| Iraq    | IRQ | 1994 | 32.21 | 27.83 | 35.88 |
| Iraq    | IRQ | 1995 | 32.25 | 27.81 | 36.07 |
| Iraq    | IRQ | 1996 | 32.22 | 27.70 | 36.17 |
| Iraq    | IRQ | 1997 | 32.26 | 27.41 | 36.32 |
| Iraq    | IRQ | 1998 | 34.70 | 30.88 | 38.27 |
| Iraq    | IRQ | 1999 | 36.49 | 32.65 | 40.02 |
| Iraq    | IRQ | 2000 | 37.02 | 33.04 | 40.58 |
| Iraq    | IRQ | 2001 | 39.68 | 36.42 | 42.90 |
| Iraq    | IRQ | 2002 | 40.20 | 36.94 | 43.44 |
| Iraq    | IRQ | 2003 | 42.04 | 39.15 | 45.10 |
| Iraq    | IRQ | 2004 | 43.82 | 41.08 | 46.77 |
| Iraq    | IRQ | 2005 | 45.39 | 42.72 | 48.14 |
| Iraq    | IRQ | 2006 | 46.44 | 43.85 | 49.21 |
| Iraq    | IRQ | 2007 | 48.10 | 45.62 | 50.73 |
| Iraq    | IRQ | 2008 | 49.84 | 47.34 | 52.34 |
| Iraq    | IRQ | 2009 | 51.50 | 49.09 | 53.96 |
| Iraq    | IRQ | 2010 | 53.03 | 50.76 | 55.41 |
| Iraq    | IRQ | 2011 | 54.67 | 52.38 | 57.11 |
| Iraq    | IRQ | 2012 | 56.21 | 53.84 | 58.49 |
| Iraq    | IRQ | 2013 | 57.34 | 54.88 | 59.71 |
| Iraq    | IRQ | 2014 | 58.49 | 55.86 | 61.01 |
| Iraq    | IRQ | 2015 | 59.81 | 56.98 | 62.43 |
| Iraq    | IRQ | 2016 | 60.83 | 57.58 | 63.60 |
| Iraq    | IRQ | 2017 | 61.65 | 58.22 | 64.55 |
| Iceland | ISL | 1990 | 81.69 | 76.68 | 84.76 |
| Iceland | ISL | 1991 | 82.01 | 76.78 | 85.15 |
| Iceland | ISL | 1992 | 82.53 | 77.13 | 85.78 |
| Iceland | ISL | 1993 | 82.96 | 77.06 | 86.40 |
| Iceland | ISL | 1994 | 83.40 | 77.25 | 86.96 |
| Iceland | ISL | 1995 | 83.66 | 77.03 | 87.34 |
| Iceland | ISL | 1996 | 84.09 | 76.95 | 87.93 |
| Iceland | ISL | 1997 | 84.31 | 76.54 | 88.28 |
| Iceland | ISL | 1998 | 84.68 | 76.27 | 88.99 |
| Iceland | ISL | 1999 | 85.05 | 75.28 | 89.67 |
| Iceland | ISL | 2000 | 85.39 | 74.95 | 90.24 |
| Iceland | ISL | 2001 | 85.47 | 73.33 | 90.73 |
| Iceland | ISL | 2002 | 85.46 | 71.20 | 91.20 |
| Iceland | ISL | 2003 | 85.65 | 69.51 | 91.71 |
| Iceland | ISL | 2004 | 85.28 | 65.77 | 91.63 |
| Iceland | ISL | 2005 | 85.05 | 62.80 | 91.82 |
| Iceland | ISL | 2006 | 84.66 | 62.84 | 91.71 |
| Iceland | ISL | 2007 | 84.24 | 62.88 | 91.57 |
| Iceland | ISL | 2008 | 83.72 | 62.92 | 91.33 |
| Iceland | ISL | 2009 | 82.58 | 62.95 | 91.05 |
| Iceland | ISL | 2010 | 81.78 | 62.98 | 90.93 |
| Iceland | ISL | 2011 | 81.45 | 63.01 | 91.06 |
| Iceland | ISL | 2012 | 81.32 | 63.05 | 91.20 |
| Iceland | ISL | 2013 | 81.09 | 63.05 | 91.09 |
| Iceland | ISL | 2014 | 80.51 | 63.04 | 90.95 |
| Iceland | ISL | 2015 | 79.94 | 63.04 | 90.70 |
| Iceland | ISL | 2016 | 79.50 | 63.04 | 90.49 |
| Iceland | ISL | 2017 | 79.10 | 63.03 | 90.32 |
| Israel  | ISR | 1990 | 78.31 | 75.65 | 80.54 |
| Israel  | ISR | 1991 | 77.60 | 74.96 | 79.70 |
| Israel  | ISR | 1992 | 77.18 | 74.45 | 79.31 |
| Israel  | ISR | 1993 | 78.14 | 75.19 | 80.37 |
| Israel  | ISR | 1994 | 78.40 | 75.40 | 80.73 |
| Israel  | ISR | 1995 | 78.74 | 75.57 | 81.05 |
| Israel  | ISR | 1996 | 79.73 | 76.36 | 82.15 |
| Israel  | ISR | 1997 | 79.93 | 76.63 | 82.36 |

|         |     |      |       |       |       |
|---------|-----|------|-------|-------|-------|
| Israel  | ISR | 1998 | 80.16 | 76.73 | 82.66 |
| Israel  | ISR | 1999 | 80.84 | 77.27 | 83.37 |
| Israel  | ISR | 2000 | 81.29 | 77.55 | 83.94 |
| Israel  | ISR | 2001 | 82.21 | 78.44 | 84.97 |
| Israel  | ISR | 2002 | 82.79 | 78.75 | 85.64 |
| Israel  | ISR | 2003 | 83.67 | 79.68 | 86.51 |
| Israel  | ISR | 2004 | 84.43 | 80.27 | 87.33 |
| Israel  | ISR | 2005 | 84.73 | 80.44 | 87.68 |
| Israel  | ISR | 2006 | 85.47 | 81.05 | 88.47 |
| Israel  | ISR | 2007 | 86.05 | 81.64 | 89.01 |
| Israel  | ISR | 2008 | 86.94 | 82.54 | 89.91 |
| Israel  | ISR | 2009 | 87.19 | 82.53 | 90.22 |
| Israel  | ISR | 2010 | 87.34 | 82.37 | 90.48 |
| Israel  | ISR | 2011 | 87.49 | 82.57 | 90.73 |
| Israel  | ISR | 2012 | 87.73 | 82.78 | 91.03 |
| Israel  | ISR | 2013 | 87.90 | 83.02 | 91.18 |
| Israel  | ISR | 2014 | 87.97 | 83.14 | 91.22 |
| Israel  | ISR | 2015 | 87.96 | 83.02 | 91.28 |
| Israel  | ISR | 2016 | 88.01 | 82.84 | 91.39 |
| Israel  | ISR | 2017 | 88.06 | 82.75 | 91.58 |
| Italy   | ITA | 1990 | 73.07 | 69.56 | 75.51 |
| Italy   | ITA | 1991 | 73.16 | 69.41 | 75.73 |
| Italy   | ITA | 1992 | 73.73 | 69.72 | 76.51 |
| Italy   | ITA | 1993 | 74.27 | 69.93 | 77.23 |
| Italy   | ITA | 1994 | 74.49 | 69.63 | 77.59 |
| Italy   | ITA | 1995 | 74.80 | 69.52 | 78.08 |
| Italy   | ITA | 1996 | 75.70 | 69.95 | 79.18 |
| Italy   | ITA | 1997 | 76.21 | 70.15 | 79.84 |
| Italy   | ITA | 1998 | 76.09 | 68.97 | 80.07 |
| Italy   | ITA | 1999 | 76.51 | 68.63 | 80.89 |
| Italy   | ITA | 2000 | 76.80 | 67.73 | 81.52 |
| Italy   | ITA | 2001 | 77.15 | 67.04 | 82.06 |
| Italy   | ITA | 2002 | 77.33 | 66.66 | 82.59 |
| Italy   | ITA | 2003 | 77.40 | 66.00 | 82.82 |
| Italy   | ITA | 2004 | 77.93 | 63.78 | 83.76 |
| Italy   | ITA | 2005 | 77.97 | 61.12 | 84.13 |
| Italy   | ITA | 2006 | 77.82 | 58.11 | 84.51 |
| Italy   | ITA | 2007 | 77.68 | 58.37 | 84.86 |
| Italy   | ITA | 2008 | 78.02 | 58.69 | 85.31 |
| Italy   | ITA | 2009 | 78.22 | 58.99 | 85.69 |
| Italy   | ITA | 2010 | 78.70 | 59.32 | 86.19 |
| Italy   | ITA | 2011 | 79.02 | 59.47 | 86.55 |
| Italy   | ITA | 2012 | 79.32 | 59.62 | 86.90 |
| Italy   | ITA | 2013 | 79.51 | 59.78 | 87.09 |
| Italy   | ITA | 2014 | 79.56 | 59.92 | 87.18 |
| Italy   | ITA | 2015 | 79.69 | 60.07 | 87.26 |
| Italy   | ITA | 2016 | 79.86 | 60.20 | 87.42 |
| Italy   | ITA | 2017 | 79.87 | 60.31 | 87.59 |
| Jamaica | JAM | 1990 | 62.03 | 59.44 | 64.30 |
| Jamaica | JAM | 1991 | 62.82 | 60.08 | 65.23 |
| Jamaica | JAM | 1992 | 62.21 | 59.25 | 64.90 |
| Jamaica | JAM | 1993 | 62.40 | 59.39 | 65.28 |
| Jamaica | JAM | 1994 | 62.36 | 59.22 | 65.34 |
| Jamaica | JAM | 1995 | 62.52 | 59.29 | 65.43 |
| Jamaica | JAM | 1996 | 62.93 | 59.77 | 65.80 |
| Jamaica | JAM | 1997 | 63.42 | 60.35 | 66.12 |
| Jamaica | JAM | 1998 | 63.75 | 60.77 | 66.21 |
| Jamaica | JAM | 1999 | 63.68 | 60.82 | 66.07 |
| Jamaica | JAM | 2000 | 65.14 | 62.20 | 67.56 |
| Jamaica | JAM | 2001 | 66.12 | 63.26 | 68.54 |
| Jamaica | JAM | 2002 | 67.41 | 64.53 | 69.81 |
| Jamaica | JAM | 2003 | 68.92 | 65.99 | 71.43 |

|         |     |      |       |       |       |
|---------|-----|------|-------|-------|-------|
| Jamaica | JAM | 2004 | 70.54 | 67.61 | 73.04 |
| Jamaica | JAM | 2005 | 72.07 | 69.18 | 74.59 |
| Jamaica | JAM | 2006 | 72.61 | 69.68 | 75.20 |
| Jamaica | JAM | 2007 | 71.40 | 68.52 | 74.04 |
| Jamaica | JAM | 2008 | 70.46 | 67.53 | 73.09 |
| Jamaica | JAM | 2009 | 69.76 | 66.94 | 72.30 |
| Jamaica | JAM | 2010 | 71.45 | 68.60 | 74.01 |
| Jamaica | JAM | 2011 | 71.65 | 68.76 | 74.22 |
| Jamaica | JAM | 2012 | 71.13 | 68.13 | 73.77 |
| Jamaica | JAM | 2013 | 70.07 | 66.96 | 72.82 |
| Jamaica | JAM | 2014 | 69.73 | 66.57 | 72.84 |
| Jamaica | JAM | 2015 | 69.97 | 66.68 | 73.29 |
| Jamaica | JAM | 2016 | 69.83 | 66.23 | 73.31 |
| Jamaica | JAM | 2017 | 70.34 | 66.50 | 74.03 |
| Jordan  | JOR | 1990 | 55.69 | 52.98 | 58.39 |
| Jordan  | JOR | 1991 | 56.72 | 54.14 | 59.38 |
| Jordan  | JOR | 1992 | 57.88 | 55.26 | 60.56 |
| Jordan  | JOR | 1993 | 58.28 | 55.49 | 60.95 |
| Jordan  | JOR | 1994 | 59.11 | 56.41 | 61.61 |
| Jordan  | JOR | 1995 | 59.79 | 57.15 | 62.32 |
| Jordan  | JOR | 1996 | 60.52 | 58.02 | 62.90 |
| Jordan  | JOR | 1997 | 61.64 | 59.24 | 63.92 |
| Jordan  | JOR | 1998 | 62.58 | 60.25 | 64.77 |
| Jordan  | JOR | 1999 | 63.44 | 61.22 | 65.55 |
| Jordan  | JOR | 2000 | 64.63 | 62.57 | 66.65 |
| Jordan  | JOR | 2001 | 65.56 | 63.59 | 67.50 |
| Jordan  | JOR | 2002 | 66.46 | 64.59 | 68.26 |
| Jordan  | JOR | 2003 | 67.56 | 65.80 | 69.18 |
| Jordan  | JOR | 2004 | 68.93 | 67.30 | 70.50 |
| Jordan  | JOR | 2005 | 70.02 | 68.47 | 71.51 |
| Jordan  | JOR | 2006 | 71.08 | 69.49 | 72.52 |
| Jordan  | JOR | 2007 | 72.77 | 71.19 | 74.25 |
| Jordan  | JOR | 2008 | 74.45 | 72.85 | 75.91 |
| Jordan  | JOR | 2009 | 75.95 | 74.32 | 77.47 |
| Jordan  | JOR | 2010 | 77.37 | 75.71 | 78.96 |
| Jordan  | JOR | 2011 | 78.53 | 76.81 | 80.12 |
| Jordan  | JOR | 2012 | 79.67 | 77.93 | 81.35 |
| Jordan  | JOR | 2013 | 80.36 | 78.48 | 82.26 |
| Jordan  | JOR | 2014 | 80.86 | 78.75 | 82.90 |
| Jordan  | JOR | 2015 | 81.26 | 78.96 | 83.49 |
| Jordan  | JOR | 2016 | 81.52 | 78.91 | 83.88 |
| Jordan  | JOR | 2017 | 81.84 | 79.04 | 84.41 |
| Japan   | JPN | 1990 | 85.81 | 84.01 | 87.28 |
| Japan   | JPN | 1991 | 86.17 | 84.35 | 87.67 |
| Japan   | JPN | 1992 | 86.45 | 84.73 | 87.93 |
| Japan   | JPN | 1993 | 86.88 | 85.20 | 88.31 |
| Japan   | JPN | 1994 | 87.67 | 86.02 | 89.06 |
| Japan   | JPN | 1995 | 87.81 | 86.20 | 89.14 |
| Japan   | JPN | 1996 | 89.13 | 87.52 | 90.47 |
| Japan   | JPN | 1997 | 89.76 | 88.17 | 91.07 |
| Japan   | JPN | 1998 | 89.86 | 88.32 | 91.15 |
| Japan   | JPN | 1999 | 90.23 | 88.70 | 91.53 |
| Japan   | JPN | 2000 | 90.99 | 89.52 | 92.29 |
| Japan   | JPN | 2001 | 91.56 | 90.06 | 92.87 |
| Japan   | JPN | 2002 | 92.18 | 90.67 | 93.46 |
| Japan   | JPN | 2003 | 92.30 | 90.82 | 93.65 |
| Japan   | JPN | 2004 | 92.43 | 90.91 | 93.80 |
| Japan   | JPN | 2005 | 92.51 | 90.92 | 93.86 |
| Japan   | JPN | 2006 | 92.67 | 91.06 | 94.02 |
| Japan   | JPN | 2007 | 92.82 | 91.14 | 94.21 |
| Japan   | JPN | 2008 | 92.99 | 91.32 | 94.41 |
| Japan   | JPN | 2009 | 93.20 | 91.54 | 94.68 |

|            |     |      |       |       |       |
|------------|-----|------|-------|-------|-------|
| Japan      | JPN | 2010 | 93.34 | 91.67 | 94.84 |
| Japan      | JPN | 2011 | 93.44 | 91.75 | 94.96 |
| Japan      | JPN | 2012 | 93.61 | 91.88 | 95.13 |
| Japan      | JPN | 2013 | 93.69 | 91.93 | 95.26 |
| Japan      | JPN | 2014 | 93.68 | 91.89 | 95.32 |
| Japan      | JPN | 2015 | 93.62 | 91.81 | 95.31 |
| Japan      | JPN | 2016 | 93.54 | 91.68 | 95.25 |
| Japan      | JPN | 2017 | 93.48 | 91.56 | 95.26 |
| Kazakhstan | KAZ | 1990 | 55.63 | 53.68 | 57.45 |
| Kazakhstan | KAZ | 1991 | 54.68 | 52.71 | 56.48 |
| Kazakhstan | KAZ | 1992 | 52.87 | 50.76 | 54.77 |
| Kazakhstan | KAZ | 1993 | 48.36 | 45.66 | 50.66 |
| Kazakhstan | KAZ | 1994 | 44.55 | 40.96 | 47.42 |
| Kazakhstan | KAZ | 1995 | 36.78 | 29.09 | 42.28 |
| Kazakhstan | KAZ | 1996 | 35.50 | 28.96 | 41.45 |
| Kazakhstan | KAZ | 1997 | 40.47 | 34.58 | 44.61 |
| Kazakhstan | KAZ | 1998 | 45.35 | 41.85 | 48.18 |
| Kazakhstan | KAZ | 1999 | 48.66 | 45.92 | 51.02 |
| Kazakhstan | KAZ | 2000 | 47.12 | 44.06 | 49.70 |
| Kazakhstan | KAZ | 2001 | 46.98 | 43.85 | 49.63 |
| Kazakhstan | KAZ | 2002 | 46.69 | 43.44 | 49.42 |
| Kazakhstan | KAZ | 2003 | 45.15 | 41.49 | 48.15 |
| Kazakhstan | KAZ | 2004 | 45.50 | 41.94 | 48.52 |
| Kazakhstan | KAZ | 2005 | 45.42 | 41.86 | 48.57 |
| Kazakhstan | KAZ | 2006 | 46.62 | 43.44 | 49.56 |
| Kazakhstan | KAZ | 2007 | 50.14 | 47.50 | 52.63 |
| Kazakhstan | KAZ | 2008 | 53.91 | 51.62 | 56.10 |
| Kazakhstan | KAZ | 2009 | 57.05 | 54.83 | 59.04 |
| Kazakhstan | KAZ | 2010 | 57.67 | 55.45 | 59.68 |
| Kazakhstan | KAZ | 2011 | 58.71 | 56.22 | 60.86 |
| Kazakhstan | KAZ | 2012 | 60.03 | 57.25 | 62.33 |
| Kazakhstan | KAZ | 2013 | 62.12 | 58.99 | 64.51 |
| Kazakhstan | KAZ | 2014 | 63.87 | 60.28 | 66.42 |
| Kazakhstan | KAZ | 2015 | 64.67 | 60.61 | 67.47 |
| Kazakhstan | KAZ | 2016 | 64.74 | 59.99 | 67.86 |
| Kazakhstan | KAZ | 2017 | 65.00 | 59.71 | 68.56 |
| Kenya      | KEN | 1990 | 39.55 | 36.45 | 42.25 |
| Kenya      | KEN | 1991 | 40.06 | 36.96 | 42.69 |
| Kenya      | KEN | 1992 | 40.40 | 37.53 | 43.05 |
| Kenya      | KEN | 1993 | 40.79 | 37.97 | 43.38 |
| Kenya      | KEN | 1994 | 41.25 | 38.57 | 43.74 |
| Kenya      | KEN | 1995 | 41.75 | 39.06 | 44.22 |
| Kenya      | KEN | 1996 | 42.04 | 39.40 | 44.54 |
| Kenya      | KEN | 1997 | 42.06 | 39.41 | 44.50 |
| Kenya      | KEN | 1998 | 42.32 | 39.67 | 44.75 |
| Kenya      | KEN | 1999 | 42.92 | 40.33 | 45.36 |
| Kenya      | KEN | 2000 | 43.02 | 40.46 | 45.50 |
| Kenya      | KEN | 2001 | 43.77 | 41.17 | 46.26 |
| Kenya      | KEN | 2002 | 44.20 | 41.67 | 46.74 |
| Kenya      | KEN | 2003 | 44.98 | 42.52 | 47.60 |
| Kenya      | KEN | 2004 | 46.28 | 43.78 | 48.85 |
| Kenya      | KEN | 2005 | 47.02 | 44.44 | 49.52 |
| Kenya      | KEN | 2006 | 47.82 | 45.27 | 50.28 |
| Kenya      | KEN | 2007 | 48.72 | 46.17 | 51.15 |
| Kenya      | KEN | 2008 | 49.41 | 46.89 | 51.84 |
| Kenya      | KEN | 2009 | 50.11 | 47.63 | 52.65 |
| Kenya      | KEN | 2010 | 50.83 | 48.33 | 53.34 |
| Kenya      | KEN | 2011 | 51.59 | 49.04 | 54.15 |
| Kenya      | KEN | 2012 | 52.41 | 49.81 | 54.96 |
| Kenya      | KEN | 2013 | 53.44 | 50.87 | 55.97 |
| Kenya      | KEN | 2014 | 54.25 | 51.61 | 56.71 |
| Kenya      | KEN | 2015 | 54.77 | 52.08 | 57.31 |

|            |     |      |       |       |       |
|------------|-----|------|-------|-------|-------|
| Kenya      | KEN | 2016 | 55.35 | 52.64 | 57.93 |
| Kenya      | KEN | 2017 | 56.22 | 53.56 | 58.79 |
| Kyrgyzstan | KGZ | 1990 | 50.28 | 47.34 | 53.08 |
| Kyrgyzstan | KGZ | 1991 | 49.43 | 46.53 | 52.21 |
| Kyrgyzstan | KGZ | 1992 | 48.37 | 45.41 | 51.20 |
| Kyrgyzstan | KGZ | 1993 | 46.48 | 43.36 | 49.53 |
| Kyrgyzstan | KGZ | 1994 | 44.80 | 41.36 | 48.13 |
| Kyrgyzstan | KGZ | 1995 | 45.10 | 41.54 | 48.41 |
| Kyrgyzstan | KGZ | 1996 | 46.66 | 43.11 | 49.61 |
| Kyrgyzstan | KGZ | 1997 | 47.91 | 44.86 | 50.80 |
| Kyrgyzstan | KGZ | 1998 | 49.05 | 46.16 | 51.71 |
| Kyrgyzstan | KGZ | 1999 | 50.48 | 47.89 | 52.96 |
| Kyrgyzstan | KGZ | 2000 | 51.22 | 48.64 | 53.78 |
| Kyrgyzstan | KGZ | 2001 | 51.74 | 49.14 | 54.32 |
| Kyrgyzstan | KGZ | 2002 | 52.18 | 49.58 | 54.66 |
| Kyrgyzstan | KGZ | 2003 | 52.69 | 50.04 | 55.18 |
| Kyrgyzstan | KGZ | 2004 | 53.13 | 50.67 | 55.58 |
| Kyrgyzstan | KGZ | 2005 | 53.54 | 51.17 | 55.90 |
| Kyrgyzstan | KGZ | 2006 | 54.70 | 52.36 | 56.84 |
| Kyrgyzstan | KGZ | 2007 | 56.10 | 53.86 | 58.21 |
| Kyrgyzstan | KGZ | 2008 | 58.40 | 56.28 | 60.37 |
| Kyrgyzstan | KGZ | 2009 | 60.66 | 58.65 | 62.60 |
| Kyrgyzstan | KGZ | 2010 | 61.85 | 59.85 | 63.79 |
| Kyrgyzstan | KGZ | 2011 | 62.99 | 60.98 | 64.92 |
| Kyrgyzstan | KGZ | 2012 | 64.19 | 62.16 | 66.11 |
| Kyrgyzstan | KGZ | 2013 | 65.14 | 63.08 | 67.00 |
| Kyrgyzstan | KGZ | 2014 | 66.16 | 64.14 | 67.99 |
| Kyrgyzstan | KGZ | 2015 | 67.65 | 65.60 | 69.50 |
| Kyrgyzstan | KGZ | 2016 | 69.18 | 67.03 | 71.14 |
| Kyrgyzstan | KGZ | 2017 | 69.64 | 67.30 | 71.66 |
| Cambodia   | KHM | 1990 | 19.32 | 15.83 | 22.26 |
| Cambodia   | KHM | 1991 | 20.06 | 16.82 | 22.80 |
| Cambodia   | KHM | 1992 | 20.83 | 17.97 | 23.54 |
| Cambodia   | KHM | 1993 | 21.50 | 18.67 | 23.99 |
| Cambodia   | KHM | 1994 | 22.25 | 19.56 | 24.69 |
| Cambodia   | KHM | 1995 | 23.20 | 20.55 | 25.57 |
| Cambodia   | KHM | 1996 | 23.99 | 21.46 | 26.26 |
| Cambodia   | KHM | 1997 | 25.00 | 22.68 | 27.14 |
| Cambodia   | KHM | 1998 | 26.00 | 23.85 | 28.13 |
| Cambodia   | KHM | 1999 | 27.37 | 25.07 | 29.51 |
| Cambodia   | KHM | 2000 | 29.24 | 27.03 | 31.33 |
| Cambodia   | KHM | 2001 | 31.18 | 29.01 | 33.26 |
| Cambodia   | KHM | 2002 | 33.16 | 31.03 | 35.26 |
| Cambodia   | KHM | 2003 | 35.36 | 33.26 | 37.43 |
| Cambodia   | KHM | 2004 | 37.30 | 35.24 | 39.45 |
| Cambodia   | KHM | 2005 | 39.06 | 37.08 | 41.13 |
| Cambodia   | KHM | 2006 | 40.60 | 38.64 | 42.58 |
| Cambodia   | KHM | 2007 | 42.02 | 40.04 | 44.02 |
| Cambodia   | KHM | 2008 | 43.55 | 41.60 | 45.55 |
| Cambodia   | KHM | 2009 | 44.95 | 42.96 | 47.01 |
| Cambodia   | KHM | 2010 | 46.25 | 44.02 | 48.30 |
| Cambodia   | KHM | 2011 | 47.42 | 45.21 | 49.51 |
| Cambodia   | KHM | 2012 | 48.58 | 46.26 | 50.65 |
| Cambodia   | KHM | 2013 | 49.57 | 47.19 | 51.67 |
| Cambodia   | KHM | 2014 | 50.61 | 48.22 | 52.78 |
| Cambodia   | KHM | 2015 | 51.44 | 48.99 | 53.69 |
| Cambodia   | KHM | 2016 | 52.26 | 49.76 | 54.58 |
| Cambodia   | KHM | 2017 | 52.99 | 50.36 | 55.40 |
| Kiribati   | KIR | 1990 | 14.81 | 8.07  | 16.97 |
| Kiribati   | KIR | 1991 | 14.91 | 8.16  | 16.87 |
| Kiribati   | KIR | 1992 | 15.10 | 8.27  | 17.16 |
| Kiribati   | KIR | 1993 | 15.35 | 8.40  | 17.40 |

|                   |     |      |       |       |       |
|-------------------|-----|------|-------|-------|-------|
| Kiribati          | KIR | 1994 | 15.35 | 8.42  | 17.42 |
| Kiribati          | KIR | 1995 | 15.33 | 8.46  | 17.41 |
| Kiribati          | KIR | 1996 | 15.69 | 8.68  | 17.77 |
| Kiribati          | KIR | 1997 | 15.94 | 8.81  | 18.00 |
| Kiribati          | KIR | 1998 | 16.15 | 8.96  | 18.22 |
| Kiribati          | KIR | 1999 | 16.36 | 9.06  | 18.43 |
| Kiribati          | KIR | 2000 | 16.66 | 9.26  | 18.63 |
| Kiribati          | KIR | 2001 | 17.02 | 12.88 | 19.00 |
| Kiribati          | KIR | 2002 | 17.38 | 13.82 | 19.26 |
| Kiribati          | KIR | 2003 | 17.65 | 15.00 | 19.46 |
| Kiribati          | KIR | 2004 | 17.78 | 14.93 | 19.65 |
| Kiribati          | KIR | 2005 | 18.19 | 15.80 | 19.97 |
| Kiribati          | KIR | 2006 | 18.57 | 16.40 | 20.34 |
| Kiribati          | KIR | 2007 | 19.04 | 16.93 | 20.65 |
| Kiribati          | KIR | 2008 | 19.36 | 17.22 | 21.03 |
| Kiribati          | KIR | 2009 | 19.68 | 17.68 | 21.31 |
| Kiribati          | KIR | 2010 | 20.00 | 18.02 | 21.68 |
| Kiribati          | KIR | 2011 | 20.22 | 18.29 | 22.11 |
| Kiribati          | KIR | 2012 | 20.41 | 18.39 | 23.18 |
| Kiribati          | KIR | 2013 | 20.68 | 18.65 | 25.22 |
| Kiribati          | KIR | 2014 | 20.92 | 18.83 | 26.89 |
| Kiribati          | KIR | 2015 | 21.27 | 19.04 | 28.25 |
| Kiribati          | KIR | 2016 | 21.73 | 19.28 | 29.82 |
| Kiribati          | KIR | 2017 | 22.26 | 19.56 | 31.35 |
| Republic of Korea | KOR | 1990 | 64.46 | 62.33 | 66.62 |
| Republic of Korea | KOR | 1991 | 65.89 | 63.71 | 68.00 |
| Republic of Korea | KOR | 1992 | 67.92 | 65.73 | 70.08 |
| Republic of Korea | KOR | 1993 | 69.49 | 67.29 | 71.63 |
| Republic of Korea | KOR | 1994 | 70.64 | 68.43 | 72.69 |
| Republic of Korea | KOR | 1995 | 72.38 | 70.06 | 74.42 |
| Republic of Korea | KOR | 1996 | 74.10 | 71.72 | 76.18 |
| Republic of Korea | KOR | 1997 | 75.20 | 72.81 | 77.30 |
| Republic of Korea | KOR | 1998 | 75.96 | 73.53 | 78.10 |
| Republic of Korea | KOR | 1999 | 76.76 | 74.36 | 78.88 |
| Republic of Korea | KOR | 2000 | 77.37 | 74.81 | 79.55 |
| Republic of Korea | KOR | 2001 | 78.24 | 75.39 | 80.55 |
| Republic of Korea | KOR | 2002 | 78.91 | 75.64 | 81.41 |
| Republic of Korea | KOR | 2003 | 79.30 | 75.55 | 82.10 |
| Republic of Korea | KOR | 2004 | 79.39 | 74.58 | 82.65 |
| Republic of Korea | KOR | 2005 | 80.51 | 75.44 | 84.01 |
| Republic of Korea | KOR | 2006 | 81.49 | 75.83 | 85.15 |
| Republic of Korea | KOR | 2007 | 82.57 | 76.81 | 86.31 |
| Republic of Korea | KOR | 2008 | 83.46 | 77.46 | 87.41 |
| Republic of Korea | KOR | 2009 | 84.34 | 77.94 | 88.36 |
| Republic of Korea | KOR | 2010 | 85.25 | 78.69 | 89.20 |
| Republic of Korea | KOR | 2011 | 86.10 | 79.53 | 90.00 |
| Republic of Korea | KOR | 2012 | 86.37 | 79.44 | 90.35 |
| Republic of Korea | KOR | 2013 | 86.64 | 79.65 | 90.71 |
| Republic of Korea | KOR | 2014 | 86.61 | 79.03 | 90.86 |
| Republic of Korea | KOR | 2015 | 86.60 | 78.62 | 91.01 |
| Republic of Korea | KOR | 2016 | 86.54 | 78.17 | 91.16 |
| Republic of Korea | KOR | 2017 | 86.46 | 76.93 | 91.21 |
| Kuwait            | KWT | 1990 | 51.88 | 44.01 | 62.73 |
| Kuwait            | KWT | 1991 | 54.34 | 45.49 | 65.00 |
| Kuwait            | KWT | 1992 | 57.43 | 46.50 | 67.02 |
| Kuwait            | KWT | 1993 | 60.65 | 46.96 | 68.50 |
| Kuwait            | KWT | 1994 | 61.86 | 47.04 | 68.61 |
| Kuwait            | KWT | 1995 | 62.38 | 47.06 | 68.72 |
| Kuwait            | KWT | 1996 | 63.56 | 47.78 | 69.81 |
| Kuwait            | KWT | 1997 | 63.33 | 47.69 | 69.70 |
| Kuwait            | KWT | 1998 | 62.85 | 47.99 | 70.01 |
| Kuwait            | KWT | 1999 | 60.22 | 47.88 | 69.09 |



|                         |     |      |       |       |       |
|-------------------------|-----|------|-------|-------|-------|
| Kuwait                  | KWT | 2000 | 57.93 | 48.03 | 68.73 |
| Kuwait                  | KWT | 2001 | 58.43 | 48.90 | 69.84 |
| Kuwait                  | KWT | 2002 | 58.28 | 49.27 | 70.11 |
| Kuwait                  | KWT | 2003 | 57.41 | 49.62 | 69.98 |
| Kuwait                  | KWT | 2004 | 55.31 | 49.53 | 68.74 |
| Kuwait                  | KWT | 2005 | 54.07 | 49.57 | 67.84 |
| Kuwait                  | KWT | 2006 | 53.17 | 49.83 | 66.86 |
| Kuwait                  | KWT | 2007 | 53.47 | 50.43 | 67.16 |
| Kuwait                  | KWT | 2008 | 53.32 | 50.86 | 66.31 |
| Kuwait                  | KWT | 2009 | 54.08 | 51.87 | 67.36 |
| Kuwait                  | KWT | 2010 | 55.46 | 53.24 | 68.64 |
| Kuwait                  | KWT | 2011 | 56.38 | 54.26 | 69.49 |
| Kuwait                  | KWT | 2012 | 56.73 | 54.76 | 69.38 |
| Kuwait                  | KWT | 2013 | 56.74 | 55.20 | 67.68 |
| Kuwait                  | KWT | 2014 | 56.82 | 55.61 | 64.88 |
| Kuwait                  | KWT | 2015 | 56.98 | 55.91 | 63.50 |
| Kuwait                  | KWT | 2016 | 57.20 | 56.20 | 62.32 |
| Kuwait                  | KWT | 2017 | 57.39 | 56.47 | 59.67 |
| People's Democratic Rep | LAO | 1990 | 6.79  | 3.23  | 10.49 |
| People's Democratic Rep | LAO | 1991 | 7.66  | 3.44  | 12.35 |
| People's Democratic Rep | LAO | 1992 | 8.67  | 3.63  | 13.89 |
| People's Democratic Rep | LAO | 1993 | 10.00 | 4.40  | 15.82 |
| People's Democratic Rep | LAO | 1994 | 11.87 | 5.70  | 17.73 |
| People's Democratic Rep | LAO | 1995 | 13.77 | 6.94  | 19.10 |
| People's Democratic Rep | LAO | 1996 | 15.35 | 8.17  | 20.52 |
| People's Democratic Rep | LAO | 1997 | 16.64 | 9.12  | 21.35 |
| People's Democratic Rep | LAO | 1998 | 17.84 | 10.41 | 22.42 |
| People's Democratic Rep | LAO | 1999 | 19.11 | 12.05 | 23.46 |
| People's Democratic Rep | LAO | 2000 | 20.44 | 14.66 | 24.63 |
| People's Democratic Rep | LAO | 2001 | 21.57 | 16.00 | 25.79 |
| People's Democratic Rep | LAO | 2002 | 24.16 | 19.17 | 28.26 |
| People's Democratic Rep | LAO | 2003 | 25.99 | 21.61 | 29.88 |
| People's Democratic Rep | LAO | 2004 | 27.63 | 23.25 | 31.41 |
| People's Democratic Rep | LAO | 2005 | 29.40 | 25.17 | 33.13 |
| People's Democratic Rep | LAO | 2006 | 31.03 | 26.75 | 34.76 |
| People's Democratic Rep | LAO | 2007 | 32.42 | 28.04 | 36.19 |
| People's Democratic Rep | LAO | 2008 | 33.91 | 29.42 | 37.68 |
| People's Democratic Rep | LAO | 2009 | 35.44 | 30.82 | 39.42 |
| People's Democratic Rep | LAO | 2010 | 36.78 | 32.36 | 40.68 |
| People's Democratic Rep | LAO | 2011 | 38.04 | 33.74 | 42.01 |
| People's Democratic Rep | LAO | 2012 | 39.37 | 35.08 | 43.36 |
| People's Democratic Rep | LAO | 2013 | 40.68 | 36.40 | 44.74 |
| People's Democratic Rep | LAO | 2014 | 41.91 | 37.48 | 45.95 |
| People's Democratic Rep | LAO | 2015 | 43.22 | 38.93 | 47.34 |
| People's Democratic Rep | LAO | 2016 | 44.22 | 40.09 | 48.31 |
| People's Democratic Rep | LAO | 2017 | 45.16 | 41.07 | 49.21 |
| Lebanon                 | LBN | 1990 | 51.50 | 47.67 | 55.29 |
| Lebanon                 | LBN | 1991 | 52.71 | 48.90 | 56.58 |
| Lebanon                 | LBN | 1992 | 53.74 | 50.02 | 57.63 |
| Lebanon                 | LBN | 1993 | 54.96 | 51.24 | 58.75 |
| Lebanon                 | LBN | 1994 | 56.23 | 52.42 | 60.00 |
| Lebanon                 | LBN | 1995 | 57.39 | 53.61 | 61.10 |
| Lebanon                 | LBN | 1996 | 58.66 | 54.97 | 62.26 |
| Lebanon                 | LBN | 1997 | 59.75 | 56.08 | 63.29 |
| Lebanon                 | LBN | 1998 | 60.74 | 56.96 | 64.20 |
| Lebanon                 | LBN | 1999 | 61.42 | 57.42 | 64.97 |
| Lebanon                 | LBN | 2000 | 62.32 | 58.38 | 66.03 |
| Lebanon                 | LBN | 2001 | 63.21 | 59.56 | 66.73 |
| Lebanon                 | LBN | 2002 | 63.84 | 60.30 | 67.23 |
| Lebanon                 | LBN | 2003 | 64.27 | 60.59 | 67.52 |
| Lebanon                 | LBN | 2004 | 64.49 | 60.83 | 67.57 |
| Lebanon                 | LBN | 2005 | 64.91 | 61.25 | 67.84 |

|         |     |      |       |       |       |
|---------|-----|------|-------|-------|-------|
| Lebanon | LBN | 2006 | 65.31 | 61.92 | 68.18 |
| Lebanon | LBN | 2007 | 66.51 | 63.27 | 69.20 |
| Lebanon | LBN | 2008 | 67.55 | 64.47 | 70.10 |
| Lebanon | LBN | 2009 | 68.69 | 65.65 | 71.34 |
| Lebanon | LBN | 2010 | 69.85 | 67.05 | 72.41 |
| Lebanon | LBN | 2011 | 70.74 | 67.89 | 73.27 |
| Lebanon | LBN | 2012 | 71.27 | 68.31 | 73.85 |
| Lebanon | LBN | 2013 | 71.51 | 68.30 | 74.25 |
| Lebanon | LBN | 2014 | 71.51 | 68.05 | 74.45 |
| Lebanon | LBN | 2015 | 71.65 | 67.95 | 74.79 |
| Lebanon | LBN | 2016 | 71.76 | 67.98 | 75.10 |
| Lebanon | LBN | 2017 | 71.92 | 67.88 | 75.44 |
| Liberia | LBR | 1990 | 18.67 | 11.12 | 23.68 |
| Liberia | LBR | 1991 | 22.12 | 12.84 | 26.27 |
| Liberia | LBR | 1992 | 23.61 | 13.71 | 27.60 |
| Liberia | LBR | 1993 | 22.87 | 13.23 | 27.01 |
| Liberia | LBR | 1994 | 22.32 | 12.77 | 26.69 |
| Liberia | LBR | 1995 | 22.89 | 13.10 | 27.40 |
| Liberia | LBR | 1996 | 21.67 | 12.52 | 26.48 |
| Liberia | LBR | 1997 | 22.83 | 13.18 | 27.72 |
| Liberia | LBR | 1998 | 23.35 | 13.45 | 28.42 |
| Liberia | LBR | 1999 | 25.06 | 14.26 | 29.91 |
| Liberia | LBR | 2000 | 27.99 | 15.81 | 32.52 |
| Liberia | LBR | 2001 | 29.89 | 17.31 | 33.94 |
| Liberia | LBR | 2002 | 30.77 | 24.82 | 34.79 |
| Liberia | LBR | 2003 | 31.38 | 25.61 | 35.42 |
| Liberia | LBR | 2004 | 33.38 | 26.74 | 37.53 |
| Liberia | LBR | 2005 | 34.76 | 28.71 | 38.95 |
| Liberia | LBR | 2006 | 36.23 | 30.19 | 40.32 |
| Liberia | LBR | 2007 | 37.13 | 31.40 | 41.05 |
| Liberia | LBR | 2008 | 37.51 | 30.52 | 41.58 |
| Liberia | LBR | 2009 | 37.65 | 28.63 | 41.90 |
| Liberia | LBR | 2010 | 38.21 | 30.99 | 42.52 |
| Liberia | LBR | 2011 | 39.17 | 32.90 | 43.37 |
| Liberia | LBR | 2012 | 39.54 | 33.94 | 43.53 |
| Liberia | LBR | 2013 | 40.52 | 35.74 | 44.37 |
| Liberia | LBR | 2014 | 40.98 | 35.70 | 45.11 |
| Liberia | LBR | 2015 | 41.47 | 36.14 | 45.92 |
| Liberia | LBR | 2016 | 43.34 | 38.76 | 47.31 |
| Liberia | LBR | 2017 | 44.27 | 39.89 | 48.31 |
| Libya   | LYB | 1990 | 44.95 | 33.98 | 50.42 |
| Libya   | LYB | 1991 | 45.52 | 34.47 | 51.07 |
| Libya   | LYB | 1992 | 46.78 | 35.26 | 52.00 |
| Libya   | LYB | 1993 | 48.70 | 37.06 | 53.14 |
| Libya   | LYB | 1994 | 49.81 | 39.21 | 54.17 |
| Libya   | LYB | 1995 | 50.77 | 41.81 | 55.00 |
| Libya   | LYB | 1996 | 52.10 | 44.90 | 56.01 |
| Libya   | LYB | 1997 | 52.92 | 46.96 | 56.57 |
| Libya   | LYB | 1998 | 53.44 | 47.92 | 56.99 |
| Libya   | LYB | 1999 | 53.59 | 47.61 | 57.42 |
| Libya   | LYB | 2000 | 53.55 | 46.07 | 57.52 |
| Libya   | LYB | 2001 | 54.31 | 47.67 | 58.12 |
| Libya   | LYB | 2002 | 54.88 | 48.65 | 58.60 |
| Libya   | LYB | 2003 | 55.41 | 49.18 | 59.25 |
| Libya   | LYB | 2004 | 55.35 | 48.33 | 59.38 |
| Libya   | LYB | 2005 | 55.37 | 46.54 | 59.55 |
| Libya   | LYB | 2006 | 56.05 | 44.65 | 60.59 |
| Libya   | LYB | 2007 | 56.70 | 43.86 | 61.48 |
| Libya   | LYB | 2008 | 56.71 | 42.45 | 61.96 |
| Libya   | LYB | 2009 | 56.82 | 42.41 | 62.19 |
| Libya   | LYB | 2010 | 57.39 | 43.13 | 62.97 |
| Libya   | LYB | 2011 | 57.48 | 44.96 | 62.81 |

|             |     |      |       |       |       |
|-------------|-----|------|-------|-------|-------|
| Libya       | LBY | 2012 | 58.62 | 46.21 | 64.19 |
| Libya       | LBY | 2013 | 58.49 | 44.60 | 64.21 |
| Libya       | LBY | 2014 | 58.37 | 44.67 | 64.25 |
| Libya       | LBY | 2015 | 58.94 | 46.80 | 64.59 |
| Libya       | LBY | 2016 | 59.32 | 49.11 | 64.77 |
| Libya       | LBY | 2017 | 59.87 | 49.31 | 65.31 |
| Saint Lucia | LCA | 1990 | 50.57 | 48.33 | 52.75 |
| Saint Lucia | LCA | 1991 | 51.29 | 49.10 | 53.48 |
| Saint Lucia | LCA | 1992 | 51.84 | 49.63 | 54.06 |
| Saint Lucia | LCA | 1993 | 52.64 | 50.37 | 54.87 |
| Saint Lucia | LCA | 1994 | 52.89 | 50.56 | 55.16 |
| Saint Lucia | LCA | 1995 | 53.88 | 51.53 | 56.23 |
| Saint Lucia | LCA | 1996 | 54.95 | 52.61 | 57.26 |
| Saint Lucia | LCA | 1997 | 56.05 | 53.72 | 58.28 |
| Saint Lucia | LCA | 1998 | 57.39 | 55.05 | 59.57 |
| Saint Lucia | LCA | 1999 | 58.69 | 56.39 | 60.82 |
| Saint Lucia | LCA | 2000 | 60.09 | 57.74 | 62.20 |
| Saint Lucia | LCA | 2001 | 61.38 | 59.06 | 63.52 |
| Saint Lucia | LCA | 2002 | 62.10 | 59.75 | 64.24 |
| Saint Lucia | LCA | 2003 | 62.76 | 60.45 | 64.92 |
| Saint Lucia | LCA | 2004 | 63.36 | 61.09 | 65.54 |
| Saint Lucia | LCA | 2005 | 63.88 | 61.65 | 66.03 |
| Saint Lucia | LCA | 2006 | 64.63 | 62.49 | 66.80 |
| Saint Lucia | LCA | 2007 | 65.85 | 63.76 | 67.99 |
| Saint Lucia | LCA | 2008 | 67.09 | 65.02 | 69.25 |
| Saint Lucia | LCA | 2009 | 67.88 | 65.72 | 70.00 |
| Saint Lucia | LCA | 2010 | 68.51 | 66.50 | 70.57 |
| Saint Lucia | LCA | 2011 | 68.87 | 66.81 | 70.92 |
| Saint Lucia | LCA | 2012 | 69.23 | 67.20 | 71.21 |
| Saint Lucia | LCA | 2013 | 69.49 | 67.38 | 71.44 |
| Saint Lucia | LCA | 2014 | 69.67 | 67.53 | 71.72 |
| Saint Lucia | LCA | 2015 | 69.89 | 67.63 | 71.99 |
| Saint Lucia | LCA | 2016 | 70.16 | 67.81 | 72.36 |
| Saint Lucia | LCA | 2017 | 70.36 | 67.93 | 72.64 |
| Sri Lanka   | LKA | 1990 | 38.30 | 32.48 | 42.76 |
| Sri Lanka   | LKA | 1991 | 42.92 | 38.21 | 46.33 |
| Sri Lanka   | LKA | 1992 | 45.24 | 41.32 | 48.35 |
| Sri Lanka   | LKA | 1993 | 47.25 | 43.68 | 50.26 |
| Sri Lanka   | LKA | 1994 | 47.90 | 44.48 | 50.80 |
| Sri Lanka   | LKA | 1995 | 47.81 | 44.48 | 50.64 |
| Sri Lanka   | LKA | 1996 | 47.85 | 44.72 | 50.63 |
| Sri Lanka   | LKA | 1997 | 47.48 | 44.58 | 50.18 |
| Sri Lanka   | LKA | 1998 | 48.67 | 45.74 | 51.33 |
| Sri Lanka   | LKA | 1999 | 48.81 | 45.87 | 51.54 |
| Sri Lanka   | LKA | 2000 | 49.09 | 46.05 | 51.70 |
| Sri Lanka   | LKA | 2001 | 50.68 | 47.60 | 53.35 |
| Sri Lanka   | LKA | 2002 | 51.99 | 48.87 | 54.68 |
| Sri Lanka   | LKA | 2003 | 52.66 | 49.55 | 55.30 |
| Sri Lanka   | LKA | 2004 | 54.23 | 51.18 | 56.95 |
| Sri Lanka   | LKA | 2005 | 54.99 | 51.80 | 57.71 |
| Sri Lanka   | LKA | 2006 | 56.21 | 53.14 | 58.85 |
| Sri Lanka   | LKA | 2007 | 57.40 | 54.35 | 60.08 |
| Sri Lanka   | LKA | 2008 | 58.45 | 55.24 | 61.20 |
| Sri Lanka   | LKA | 2009 | 59.90 | 56.64 | 62.62 |
| Sri Lanka   | LKA | 2010 | 61.13 | 57.88 | 63.96 |
| Sri Lanka   | LKA | 2011 | 61.82 | 58.44 | 64.73 |
| Sri Lanka   | LKA | 2012 | 62.72 | 59.35 | 65.84 |
| Sri Lanka   | LKA | 2013 | 63.83 | 60.51 | 66.76 |
| Sri Lanka   | LKA | 2014 | 64.57 | 61.08 | 67.78 |
| Sri Lanka   | LKA | 2015 | 65.65 | 61.93 | 69.04 |
| Sri Lanka   | LKA | 2016 | 66.50 | 62.76 | 70.27 |
| Sri Lanka   | LKA | 2017 | 67.33 | 63.31 | 71.51 |

|            |     |      |       |       |       |
|------------|-----|------|-------|-------|-------|
| Lesotho    | LSO | 1990 | 13.67 | 10.71 | 20.60 |
| Lesotho    | LSO | 1991 | 16.79 | 12.34 | 24.93 |
| Lesotho    | LSO | 1992 | 19.53 | 14.36 | 28.35 |
| Lesotho    | LSO | 1993 | 21.36 | 15.24 | 30.26 |
| Lesotho    | LSO | 1994 | 22.78 | 15.77 | 31.58 |
| Lesotho    | LSO | 1995 | 24.24 | 16.25 | 32.72 |
| Lesotho    | LSO | 1996 | 25.66 | 16.63 | 33.77 |
| Lesotho    | LSO | 1997 | 26.50 | 16.78 | 34.11 |
| Lesotho    | LSO | 1998 | 26.51 | 16.46 | 33.91 |
| Lesotho    | LSO | 1999 | 26.58 | 16.14 | 33.76 |
| Lesotho    | LSO | 2000 | 25.45 | 15.19 | 32.60 |
| Lesotho    | LSO | 2001 | 25.60 | 15.31 | 32.83 |
| Lesotho    | LSO | 2002 | 24.80 | 14.54 | 32.16 |
| Lesotho    | LSO | 2003 | 23.83 | 13.93 | 31.11 |
| Lesotho    | LSO | 2004 | 23.41 | 13.57 | 30.84 |
| Lesotho    | LSO | 2005 | 23.06 | 13.12 | 30.78 |
| Lesotho    | LSO | 2006 | 23.31 | 13.14 | 31.16 |
| Lesotho    | LSO | 2007 | 23.56 | 13.38 | 31.51 |
| Lesotho    | LSO | 2008 | 23.34 | 12.95 | 31.68 |
| Lesotho    | LSO | 2009 | 25.13 | 13.81 | 33.22 |
| Lesotho    | LSO | 2010 | 26.40 | 14.49 | 34.35 |
| Lesotho    | LSO | 2011 | 27.79 | 15.01 | 35.74 |
| Lesotho    | LSO | 2012 | 28.67 | 15.79 | 36.55 |
| Lesotho    | LSO | 2013 | 29.26 | 16.08 | 37.56 |
| Lesotho    | LSO | 2014 | 30.82 | 18.16 | 38.68 |
| Lesotho    | LSO | 2015 | 31.90 | 19.72 | 39.69 |
| Lesotho    | LSO | 2016 | 33.76 | 24.57 | 40.96 |
| Lesotho    | LSO | 2017 | 36.44 | 28.59 | 43.12 |
| Lithuania  | LTU | 1990 | 68.16 | 66.33 | 69.72 |
| Lithuania  | LTU | 1991 | 67.08 | 65.27 | 68.73 |
| Lithuania  | LTU | 1992 | 67.33 | 65.58 | 68.96 |
| Lithuania  | LTU | 1993 | 64.39 | 62.58 | 66.20 |
| Lithuania  | LTU | 1994 | 63.52 | 61.63 | 65.28 |
| Lithuania  | LTU | 1995 | 65.18 | 63.43 | 66.90 |
| Lithuania  | LTU | 1996 | 68.75 | 67.22 | 70.29 |
| Lithuania  | LTU | 1997 | 71.67 | 70.21 | 73.12 |
| Lithuania  | LTU | 1998 | 72.65 | 71.23 | 74.04 |
| Lithuania  | LTU | 1999 | 73.90 | 72.46 | 75.27 |
| Lithuania  | LTU | 2000 | 74.42 | 73.03 | 75.79 |
| Lithuania  | LTU | 2001 | 73.41 | 71.92 | 74.75 |
| Lithuania  | LTU | 2002 | 74.11 | 72.62 | 75.41 |
| Lithuania  | LTU | 2003 | 74.03 | 72.50 | 75.41 |
| Lithuania  | LTU | 2004 | 73.73 | 72.21 | 75.16 |
| Lithuania  | LTU | 2005 | 72.34 | 70.50 | 73.87 |
| Lithuania  | LTU | 2006 | 71.17 | 69.16 | 72.86 |
| Lithuania  | LTU | 2007 | 70.24 | 68.00 | 72.12 |
| Lithuania  | LTU | 2008 | 72.11 | 69.59 | 74.01 |
| Lithuania  | LTU | 2009 | 75.21 | 72.68 | 77.13 |
| Lithuania  | LTU | 2010 | 75.55 | 72.99 | 77.59 |
| Lithuania  | LTU | 2011 | 76.06 | 73.24 | 78.19 |
| Lithuania  | LTU | 2012 | 76.42 | 73.44 | 78.58 |
| Lithuania  | LTU | 2013 | 76.34 | 73.25 | 78.69 |
| Lithuania  | LTU | 2014 | 77.51 | 74.36 | 79.84 |
| Lithuania  | LTU | 2015 | 77.47 | 74.31 | 79.87 |
| Lithuania  | LTU | 2016 | 77.65 | 74.42 | 80.13 |
| Lithuania  | LTU | 2017 | 77.95 | 74.24 | 80.89 |
| Luxembourg | LUX | 1990 | 74.28 | 70.24 | 77.05 |
| Luxembourg | LUX | 1991 | 74.48 | 70.14 | 77.52 |
| Luxembourg | LUX | 1992 | 74.73 | 69.97 | 78.06 |
| Luxembourg | LUX | 1993 | 74.80 | 69.33 | 78.30 |
| Luxembourg | LUX | 1994 | 74.90 | 69.13 | 78.63 |
| Luxembourg | LUX | 1995 | 74.88 | 68.45 | 78.89 |

|            |     |      |       |       |       |
|------------|-----|------|-------|-------|-------|
| Luxembourg | LUX | 1996 | 75.39 | 68.06 | 79.85 |
| Luxembourg | LUX | 1997 | 75.58 | 67.52 | 80.29 |
| Luxembourg | LUX | 1998 | 75.73 | 66.29 | 80.78 |
| Luxembourg | LUX | 1999 | 76.10 | 64.74 | 81.62 |
| Luxembourg | LUX | 2000 | 76.32 | 62.29 | 82.18 |
| Luxembourg | LUX | 2001 | 76.48 | 58.88 | 82.75 |
| Luxembourg | LUX | 2002 | 76.46 | 57.08 | 83.09 |
| Luxembourg | LUX | 2003 | 76.83 | 57.52 | 83.57 |
| Luxembourg | LUX | 2004 | 76.93 | 57.94 | 84.14 |
| Luxembourg | LUX | 2005 | 77.29 | 58.43 | 84.84 |
| Luxembourg | LUX | 2006 | 77.33 | 58.95 | 85.46 |
| Luxembourg | LUX | 2007 | 77.77 | 59.64 | 86.37 |
| Luxembourg | LUX | 2008 | 77.87 | 60.20 | 87.05 |
| Luxembourg | LUX | 2009 | 76.91 | 60.48 | 87.09 |
| Luxembourg | LUX | 2010 | 76.40 | 60.78 | 87.28 |
| Luxembourg | LUX | 2011 | 76.22 | 61.10 | 87.62 |
| Luxembourg | LUX | 2012 | 76.09 | 61.32 | 87.84 |
| Luxembourg | LUX | 2013 | 76.00 | 61.61 | 88.02 |
| Luxembourg | LUX | 2014 | 75.42 | 61.67 | 87.91 |
| Luxembourg | LUX | 2015 | 74.97 | 61.75 | 87.87 |
| Luxembourg | LUX | 2016 | 74.67 | 61.81 | 87.98 |
| Luxembourg | LUX | 2017 | 74.51 | 61.86 | 87.94 |
| Latvia     | LVA | 1990 | 64.79 | 62.43 | 66.77 |
| Latvia     | LVA | 1991 | 64.07 | 61.54 | 66.15 |
| Latvia     | LVA | 1992 | 62.22 | 59.69 | 64.39 |
| Latvia     | LVA | 1993 | 56.10 | 53.26 | 58.71 |
| Latvia     | LVA | 1994 | 50.17 | 46.05 | 53.62 |
| Latvia     | LVA | 1995 | 55.96 | 53.18 | 58.52 |
| Latvia     | LVA | 1996 | 64.46 | 62.33 | 66.32 |
| Latvia     | LVA | 1997 | 66.89 | 64.78 | 68.59 |
| Latvia     | LVA | 1998 | 65.75 | 63.67 | 67.41 |
| Latvia     | LVA | 1999 | 67.94 | 65.98 | 69.63 |
| Latvia     | LVA | 2000 | 69.49 | 67.59 | 71.12 |
| Latvia     | LVA | 2001 | 67.97 | 66.03 | 69.71 |
| Latvia     | LVA | 2002 | 68.84 | 66.73 | 70.53 |
| Latvia     | LVA | 2003 | 69.87 | 67.77 | 71.55 |
| Latvia     | LVA | 2004 | 70.15 | 67.87 | 71.89 |
| Latvia     | LVA | 2005 | 68.47 | 66.18 | 70.37 |
| Latvia     | LVA | 2006 | 66.23 | 63.68 | 68.26 |
| Latvia     | LVA | 2007 | 67.35 | 64.74 | 69.46 |
| Latvia     | LVA | 2008 | 70.44 | 67.54 | 72.52 |
| Latvia     | LVA | 2009 | 72.11 | 69.30 | 74.29 |
| Latvia     | LVA | 2010 | 72.58 | 69.74 | 74.77 |
| Latvia     | LVA | 2011 | 73.79 | 70.83 | 76.18 |
| Latvia     | LVA | 2012 | 74.62 | 71.54 | 77.00 |
| Latvia     | LVA | 2013 | 74.55 | 71.21 | 76.98 |
| Latvia     | LVA | 2014 | 75.28 | 71.71 | 77.78 |
| Latvia     | LVA | 2015 | 75.95 | 72.13 | 78.50 |
| Latvia     | LVA | 2016 | 76.17 | 72.12 | 79.08 |
| Latvia     | LVA | 2017 | 76.29 | 71.81 | 80.00 |
| Morocco    | MAR | 1990 | 25.90 | 23.53 | 27.94 |
| Morocco    | MAR | 1991 | 26.63 | 24.39 | 28.71 |
| Morocco    | MAR | 1992 | 27.32 | 24.95 | 29.41 |
| Morocco    | MAR | 1993 | 28.02 | 25.80 | 30.06 |
| Morocco    | MAR | 1994 | 28.99 | 26.90 | 31.06 |
| Morocco    | MAR | 1995 | 29.87 | 27.69 | 32.00 |
| Morocco    | MAR | 1996 | 30.92 | 28.68 | 33.07 |
| Morocco    | MAR | 1997 | 31.63 | 29.27 | 33.77 |
| Morocco    | MAR | 1998 | 32.61 | 30.28 | 34.73 |
| Morocco    | MAR | 1999 | 33.13 | 30.69 | 35.35 |
| Morocco    | MAR | 2000 | 34.22 | 31.81 | 36.38 |
| Morocco    | MAR | 2001 | 35.10 | 32.67 | 37.34 |

|                     |     |      |       |       |       |
|---------------------|-----|------|-------|-------|-------|
| Morocco             | MAR | 2002 | 35.96 | 33.54 | 38.25 |
| Morocco             | MAR | 2003 | 37.23 | 34.77 | 39.57 |
| Morocco             | MAR | 2004 | 38.09 | 35.64 | 40.52 |
| Morocco             | MAR | 2005 | 38.95 | 36.42 | 41.43 |
| Morocco             | MAR | 2006 | 39.95 | 37.27 | 42.56 |
| Morocco             | MAR | 2007 | 41.07 | 38.20 | 43.78 |
| Morocco             | MAR | 2008 | 42.12 | 39.02 | 44.99 |
| Morocco             | MAR | 2009 | 43.30 | 39.99 | 46.26 |
| Morocco             | MAR | 2010 | 44.33 | 41.01 | 47.34 |
| Morocco             | MAR | 2011 | 45.26 | 41.90 | 48.37 |
| Morocco             | MAR | 2012 | 46.21 | 42.64 | 49.47 |
| Morocco             | MAR | 2013 | 47.07 | 43.38 | 50.40 |
| Morocco             | MAR | 2014 | 48.01 | 44.00 | 51.48 |
| Morocco             | MAR | 2015 | 48.81 | 44.57 | 52.25 |
| Morocco             | MAR | 2016 | 49.63 | 45.18 | 53.26 |
| Morocco             | MAR | 2017 | 50.38 | 45.69 | 54.27 |
| Republic of Moldova | MDA | 1990 | 58.76 | 56.48 | 61.14 |
| Republic of Moldova | MDA | 1991 | 57.91 | 55.54 | 60.33 |
| Republic of Moldova | MDA | 1992 | 58.85 | 56.45 | 61.17 |
| Republic of Moldova | MDA | 1993 | 57.66 | 55.34 | 59.92 |
| Republic of Moldova | MDA | 1994 | 53.54 | 51.06 | 55.93 |
| Republic of Moldova | MDA | 1995 | 51.92 | 49.36 | 54.53 |
| Republic of Moldova | MDA | 1996 | 54.71 | 52.25 | 57.16 |
| Republic of Moldova | MDA | 1997 | 58.57 | 56.11 | 60.83 |
| Republic of Moldova | MDA | 1998 | 60.37 | 57.90 | 62.66 |
| Republic of Moldova | MDA | 1999 | 60.54 | 58.08 | 62.83 |
| Republic of Moldova | MDA | 2000 | 60.49 | 58.08 | 62.76 |
| Republic of Moldova | MDA | 2001 | 61.30 | 58.87 | 63.47 |
| Republic of Moldova | MDA | 2002 | 62.00 | 59.55 | 64.19 |
| Republic of Moldova | MDA | 2003 | 62.93 | 60.47 | 65.11 |
| Republic of Moldova | MDA | 2004 | 63.00 | 60.66 | 65.16 |
| Republic of Moldova | MDA | 2005 | 61.94 | 59.59 | 64.07 |
| Republic of Moldova | MDA | 2006 | 62.85 | 60.50 | 64.90 |
| Republic of Moldova | MDA | 2007 | 64.14 | 61.87 | 66.17 |
| Republic of Moldova | MDA | 2008 | 65.21 | 63.00 | 67.22 |
| Republic of Moldova | MDA | 2009 | 65.10 | 62.93 | 67.11 |
| Republic of Moldova | MDA | 2010 | 65.31 | 63.15 | 67.25 |
| Republic of Moldova | MDA | 2011 | 68.71 | 66.60 | 70.56 |
| Republic of Moldova | MDA | 2012 | 70.21 | 68.18 | 72.03 |
| Republic of Moldova | MDA | 2013 | 71.09 | 69.09 | 72.86 |
| Republic of Moldova | MDA | 2014 | 70.40 | 68.40 | 72.27 |
| Republic of Moldova | MDA | 2015 | 70.22 | 68.23 | 72.02 |
| Republic of Moldova | MDA | 2016 | 71.79 | 69.71 | 73.61 |
| Republic of Moldova | MDA | 2017 | 73.02 | 70.83 | 74.92 |
| Madagascar          | MDG | 1990 | 20.88 | 16.17 | 24.63 |
| Madagascar          | MDG | 1991 | 20.67 | 15.80 | 24.27 |
| Madagascar          | MDG | 1992 | 20.58 | 16.13 | 24.43 |
| Madagascar          | MDG | 1993 | 19.45 | 14.54 | 23.38 |
| Madagascar          | MDG | 1994 | 20.96 | 16.49 | 24.67 |
| Madagascar          | MDG | 1995 | 21.51 | 17.36 | 25.03 |
| Madagascar          | MDG | 1996 | 22.06 | 17.99 | 25.67 |
| Madagascar          | MDG | 1997 | 22.67 | 18.98 | 26.34 |
| Madagascar          | MDG | 1998 | 23.18 | 19.47 | 26.88 |
| Madagascar          | MDG | 1999 | 24.45 | 20.64 | 28.22 |
| Madagascar          | MDG | 2000 | 25.35 | 21.38 | 29.03 |
| Madagascar          | MDG | 2001 | 26.46 | 22.72 | 30.11 |
| Madagascar          | MDG | 2002 | 26.72 | 22.81 | 30.50 |
| Madagascar          | MDG | 2003 | 27.99 | 24.21 | 31.66 |
| Madagascar          | MDG | 2004 | 29.16 | 25.29 | 32.95 |
| Madagascar          | MDG | 2005 | 30.67 | 26.66 | 34.51 |
| Madagascar          | MDG | 2006 | 31.44 | 27.56 | 35.26 |
| Madagascar          | MDG | 2007 | 32.05 | 28.06 | 35.98 |

|            |     |      |       |       |       |
|------------|-----|------|-------|-------|-------|
| Madagascar | MDG | 2008 | 32.15 | 28.01 | 36.02 |
| Madagascar | MDG | 2009 | 31.91 | 27.37 | 35.72 |
| Madagascar | MDG | 2010 | 31.98 | 27.39 | 35.96 |
| Madagascar | MDG | 2011 | 32.16 | 27.36 | 36.31 |
| Madagascar | MDG | 2012 | 32.57 | 27.87 | 36.81 |
| Madagascar | MDG | 2013 | 33.17 | 28.32 | 37.38 |
| Madagascar | MDG | 2014 | 33.80 | 28.88 | 38.00 |
| Madagascar | MDG | 2015 | 34.46 | 29.54 | 38.89 |
| Madagascar | MDG | 2016 | 35.16 | 30.12 | 39.77 |
| Madagascar | MDG | 2017 | 35.86 | 30.78 | 40.64 |
| Maldives   | MDV | 1990 | 18.41 | 13.44 | 20.65 |
| Maldives   | MDV | 1991 | 19.20 | 16.46 | 21.06 |
| Maldives   | MDV | 1992 | 19.90 | 17.61 | 21.61 |
| Maldives   | MDV | 1993 | 20.94 | 18.78 | 22.59 |
| Maldives   | MDV | 1994 | 22.16 | 20.06 | 23.99 |
| Maldives   | MDV | 1995 | 23.33 | 21.09 | 26.03 |
| Maldives   | MDV | 1996 | 25.34 | 22.68 | 28.94 |
| Maldives   | MDV | 1997 | 28.84 | 24.69 | 32.21 |
| Maldives   | MDV | 1998 | 32.52 | 28.47 | 35.23 |
| Maldives   | MDV | 1999 | 35.63 | 32.33 | 38.20 |
| Maldives   | MDV | 2000 | 38.14 | 35.09 | 40.67 |
| Maldives   | MDV | 2001 | 40.44 | 37.66 | 42.86 |
| Maldives   | MDV | 2002 | 42.74 | 40.04 | 45.07 |
| Maldives   | MDV | 2003 | 45.16 | 42.55 | 47.37 |
| Maldives   | MDV | 2004 | 47.41 | 44.81 | 49.65 |
| Maldives   | MDV | 2005 | 49.30 | 46.69 | 51.46 |
| Maldives   | MDV | 2006 | 52.01 | 49.44 | 54.22 |
| Maldives   | MDV | 2007 | 54.42 | 51.82 | 56.73 |
| Maldives   | MDV | 2008 | 56.53 | 53.91 | 58.86 |
| Maldives   | MDV | 2009 | 58.58 | 56.06 | 60.93 |
| Maldives   | MDV | 2010 | 60.31 | 57.71 | 62.68 |
| Maldives   | MDV | 2011 | 61.95 | 59.32 | 64.25 |
| Maldives   | MDV | 2012 | 63.52 | 60.80 | 65.84 |
| Maldives   | MDV | 2013 | 64.89 | 62.23 | 67.32 |
| Maldives   | MDV | 2014 | 66.11 | 63.40 | 68.52 |
| Maldives   | MDV | 2015 | 65.85 | 63.14 | 68.18 |
| Maldives   | MDV | 2016 | 65.42 | 62.80 | 67.86 |
| Maldives   | MDV | 2017 | 68.89 | 66.19 | 71.41 |
| Mexico     | MEX | 1990 | 48.65 | 45.55 | 51.22 |
| Mexico     | MEX | 1991 | 49.75 | 46.56 | 52.40 |
| Mexico     | MEX | 1992 | 50.31 | 47.03 | 52.98 |
| Mexico     | MEX | 1993 | 50.95 | 47.59 | 53.62 |
| Mexico     | MEX | 1994 | 52.24 | 48.67 | 55.02 |
| Mexico     | MEX | 1995 | 52.80 | 49.06 | 55.56 |
| Mexico     | MEX | 1996 | 53.53 | 49.71 | 56.33 |
| Mexico     | MEX | 1997 | 54.02 | 50.11 | 56.89 |
| Mexico     | MEX | 1998 | 54.72 | 50.68 | 57.69 |
| Mexico     | MEX | 1999 | 55.71 | 51.44 | 58.70 |
| Mexico     | MEX | 2000 | 56.73 | 52.21 | 59.84 |
| Mexico     | MEX | 2001 | 57.69 | 53.32 | 60.81 |
| Mexico     | MEX | 2002 | 58.32 | 53.82 | 61.41 |
| Mexico     | MEX | 2003 | 59.08 | 54.72 | 62.11 |
| Mexico     | MEX | 2004 | 60.10 | 55.55 | 63.11 |
| Mexico     | MEX | 2005 | 60.39 | 55.61 | 63.51 |
| Mexico     | MEX | 2006 | 61.78 | 57.43 | 64.77 |
| Mexico     | MEX | 2007 | 63.00 | 58.72 | 65.91 |
| Mexico     | MEX | 2008 | 63.51 | 59.50 | 66.30 |
| Mexico     | MEX | 2009 | 64.28 | 60.67 | 66.82 |
| Mexico     | MEX | 2010 | 65.55 | 62.38 | 67.91 |
| Mexico     | MEX | 2011 | 66.67 | 63.55 | 69.04 |
| Mexico     | MEX | 2012 | 66.79 | 63.72 | 69.20 |
| Mexico     | MEX | 2013 | 66.72 | 63.54 | 69.25 |

|                  |     |      |       |       |       |
|------------------|-----|------|-------|-------|-------|
| Mexico           | MEX | 2014 | 66.95 | 63.66 | 69.60 |
| Mexico           | MEX | 2015 | 67.48 | 64.09 | 70.22 |
| Mexico           | MEX | 2016 | 67.59 | 63.99 | 70.43 |
| Mexico           | MEX | 2017 | 68.51 | 64.69 | 71.39 |
| Marshall Islands | MHL | 1990 | 20.79 | 18.97 | 22.14 |
| Marshall Islands | MHL | 1991 | 20.97 | 19.14 | 22.29 |
| Marshall Islands | MHL | 1992 | 21.07 | 19.33 | 22.40 |
| Marshall Islands | MHL | 1993 | 21.09 | 19.40 | 22.39 |
| Marshall Islands | MHL | 1994 | 21.28 | 19.66 | 22.57 |
| Marshall Islands | MHL | 1995 | 21.50 | 19.93 | 22.76 |
| Marshall Islands | MHL | 1996 | 21.73 | 20.24 | 22.95 |
| Marshall Islands | MHL | 1997 | 21.89 | 20.43 | 23.09 |
| Marshall Islands | MHL | 1998 | 22.04 | 20.57 | 23.27 |
| Marshall Islands | MHL | 1999 | 22.13 | 20.63 | 23.35 |
| Marshall Islands | MHL | 2000 | 22.04 | 20.62 | 23.31 |
| Marshall Islands | MHL | 2001 | 22.44 | 21.02 | 23.66 |
| Marshall Islands | MHL | 2002 | 22.67 | 21.28 | 23.87 |
| Marshall Islands | MHL | 2003 | 22.89 | 21.54 | 24.08 |
| Marshall Islands | MHL | 2004 | 23.10 | 21.77 | 24.29 |
| Marshall Islands | MHL | 2005 | 23.38 | 22.03 | 24.57 |
| Marshall Islands | MHL | 2006 | 23.62 | 22.29 | 24.77 |
| Marshall Islands | MHL | 2007 | 23.87 | 22.59 | 25.02 |
| Marshall Islands | MHL | 2008 | 24.07 | 22.84 | 25.24 |
| Marshall Islands | MHL | 2009 | 24.31 | 23.08 | 25.48 |
| Marshall Islands | MHL | 2010 | 24.49 | 23.27 | 25.69 |
| Marshall Islands | MHL | 2011 | 24.71 | 23.50 | 25.93 |
| Marshall Islands | MHL | 2012 | 24.93 | 23.64 | 26.14 |
| Marshall Islands | MHL | 2013 | 25.05 | 23.73 | 27.41 |
| Marshall Islands | MHL | 2014 | 25.56 | 23.95 | 31.18 |
| Marshall Islands | MHL | 2015 | 26.01 | 24.12 | 33.77 |
| Marshall Islands | MHL | 2016 | 26.61 | 24.32 | 35.99 |
| Marshall Islands | MHL | 2017 | 27.41 | 24.50 | 37.97 |
| North Macedonia  | MKD | 1990 | 59.83 | 57.13 | 62.10 |
| North Macedonia  | MKD | 1991 | 60.60 | 57.76 | 62.95 |
| North Macedonia  | MKD | 1992 | 59.66 | 56.86 | 61.96 |
| North Macedonia  | MKD | 1993 | 59.23 | 56.30 | 61.45 |
| North Macedonia  | MKD | 1994 | 59.94 | 56.99 | 62.27 |
| North Macedonia  | MKD | 1995 | 60.14 | 57.12 | 62.55 |
| North Macedonia  | MKD | 1996 | 60.61 | 57.69 | 63.02 |
| North Macedonia  | MKD | 1997 | 61.15 | 58.16 | 63.49 |
| North Macedonia  | MKD | 1998 | 61.83 | 58.84 | 64.32 |
| North Macedonia  | MKD | 1999 | 62.36 | 59.27 | 64.88 |
| North Macedonia  | MKD | 2000 | 62.15 | 58.98 | 64.68 |
| North Macedonia  | MKD | 2001 | 62.10 | 59.03 | 64.60 |
| North Macedonia  | MKD | 2002 | 62.19 | 59.24 | 64.71 |
| North Macedonia  | MKD | 2003 | 62.73 | 59.75 | 65.24 |
| North Macedonia  | MKD | 2004 | 63.52 | 60.43 | 66.22 |
| North Macedonia  | MKD | 2005 | 63.61 | 60.34 | 66.32 |
| North Macedonia  | MKD | 2006 | 63.78 | 60.51 | 66.53 |
| North Macedonia  | MKD | 2007 | 64.41 | 61.19 | 67.05 |
| North Macedonia  | MKD | 2008 | 65.91 | 62.68 | 68.54 |
| North Macedonia  | MKD | 2009 | 66.52 | 63.42 | 69.20 |
| North Macedonia  | MKD | 2010 | 67.29 | 64.00 | 69.97 |
| North Macedonia  | MKD | 2011 | 68.17 | 64.69 | 70.98 |
| North Macedonia  | MKD | 2012 | 68.68 | 64.97 | 71.63 |
| North Macedonia  | MKD | 2013 | 69.71 | 65.64 | 72.77 |
| North Macedonia  | MKD | 2014 | 69.96 | 65.54 | 73.25 |
| North Macedonia  | MKD | 2015 | 69.05 | 64.54 | 72.50 |
| North Macedonia  | MKD | 2016 | 68.82 | 64.04 | 72.37 |
| North Macedonia  | MKD | 2017 | 69.26 | 64.23 | 73.08 |
| Mali             | MLI | 1990 | 5.35  | 3.42  | 8.97  |
| Mali             | MLI | 1991 | 6.15  | 3.93  | 9.76  |



|         |     |      |       |       |       |
|---------|-----|------|-------|-------|-------|
| Mali    | MLI | 1992 | 6.85  | 4.72  | 10.58 |
| Mali    | MLI | 1993 | 7.56  | 5.24  | 11.31 |
| Mali    | MLI | 1994 | 7.82  | 5.41  | 11.55 |
| Mali    | MLI | 1995 | 8.44  | 5.89  | 12.14 |
| Mali    | MLI | 1996 | 8.85  | 6.27  | 12.64 |
| Mali    | MLI | 1997 | 8.88  | 6.17  | 12.69 |
| Mali    | MLI | 1998 | 9.50  | 6.34  | 13.15 |
| Mali    | MLI | 1999 | 10.33 | 7.03  | 14.28 |
| Mali    | MLI | 2000 | 10.78 | 7.24  | 14.72 |
| Mali    | MLI | 2001 | 11.59 | 7.76  | 15.62 |
| Mali    | MLI | 2002 | 12.60 | 8.13  | 16.38 |
| Mali    | MLI | 2003 | 13.06 | 8.50  | 17.14 |
| Mali    | MLI | 2004 | 13.78 | 8.88  | 17.92 |
| Mali    | MLI | 2005 | 14.42 | 9.19  | 18.53 |
| Mali    | MLI | 2006 | 14.89 | 9.33  | 18.81 |
| Mali    | MLI | 2007 | 15.35 | 9.45  | 19.10 |
| Mali    | MLI | 2008 | 15.73 | 9.55  | 19.47 |
| Mali    | MLI | 2009 | 16.76 | 9.87  | 21.04 |
| Mali    | MLI | 2010 | 18.37 | 10.69 | 22.65 |
| Mali    | MLI | 2011 | 19.97 | 11.46 | 24.08 |
| Mali    | MLI | 2012 | 21.31 | 12.07 | 25.37 |
| Mali    | MLI | 2013 | 22.37 | 12.58 | 26.23 |
| Mali    | MLI | 2014 | 23.56 | 13.00 | 27.39 |
| Mali    | MLI | 2015 | 24.45 | 13.44 | 28.19 |
| Mali    | MLI | 2016 | 25.16 | 13.79 | 28.99 |
| Mali    | MLI | 2017 | 25.95 | 14.54 | 29.62 |
| Malta   | MLT | 1990 | 71.92 | 69.24 | 74.06 |
| Malta   | MLT | 1991 | 72.69 | 69.87 | 74.84 |
| Malta   | MLT | 1992 | 73.41 | 70.46 | 75.62 |
| Malta   | MLT | 1993 | 74.16 | 70.96 | 76.40 |
| Malta   | MLT | 1994 | 74.61 | 71.33 | 76.97 |
| Malta   | MLT | 1995 | 74.82 | 71.32 | 77.28 |
| Malta   | MLT | 1996 | 75.20 | 71.47 | 77.82 |
| Malta   | MLT | 1997 | 75.52 | 71.54 | 78.34 |
| Malta   | MLT | 1998 | 76.00 | 71.74 | 78.96 |
| Malta   | MLT | 1999 | 76.29 | 71.55 | 79.42 |
| Malta   | MLT | 2000 | 77.18 | 72.11 | 80.58 |
| Malta   | MLT | 2001 | 77.52 | 72.06 | 81.04 |
| Malta   | MLT | 2002 | 78.02 | 71.99 | 81.67 |
| Malta   | MLT | 2003 | 78.49 | 72.18 | 82.39 |
| Malta   | MLT | 2004 | 78.78 | 72.01 | 82.87 |
| Malta   | MLT | 2005 | 78.99 | 72.14 | 83.14 |
| Malta   | MLT | 2006 | 79.34 | 72.30 | 83.69 |
| Malta   | MLT | 2007 | 79.55 | 72.45 | 83.97 |
| Malta   | MLT | 2008 | 80.18 | 73.02 | 84.66 |
| Malta   | MLT | 2009 | 80.59 | 72.76 | 85.31 |
| Malta   | MLT | 2010 | 81.05 | 72.89 | 85.86 |
| Malta   | MLT | 2011 | 81.69 | 73.04 | 86.51 |
| Malta   | MLT | 2012 | 82.01 | 72.56 | 86.90 |
| Malta   | MLT | 2013 | 82.52 | 72.95 | 87.59 |
| Malta   | MLT | 2014 | 82.59 | 71.89 | 87.91 |
| Malta   | MLT | 2015 | 82.47 | 70.68 | 87.95 |
| Malta   | MLT | 2016 | 82.11 | 69.61 | 87.78 |
| Malta   | MLT | 2017 | 81.96 | 69.89 | 87.72 |
| Myanmar | MMR | 1990 | 15.19 | 9.21  | 22.16 |
| Myanmar | MMR | 1991 | 15.93 | 9.54  | 22.92 |
| Myanmar | MMR | 1992 | 16.75 | 10.00 | 23.42 |
| Myanmar | MMR | 1993 | 17.61 | 10.54 | 24.19 |
| Myanmar | MMR | 1994 | 18.60 | 10.89 | 24.97 |
| Myanmar | MMR | 1995 | 19.71 | 11.43 | 25.76 |
| Myanmar | MMR | 1996 | 20.90 | 12.06 | 26.77 |
| Myanmar | MMR | 1997 | 22.05 | 12.62 | 27.65 |

|            |     |      |       |       |       |
|------------|-----|------|-------|-------|-------|
| Myanmar    | MMR | 1998 | 23.26 | 13.15 | 28.52 |
| Myanmar    | MMR | 1999 | 24.77 | 13.76 | 29.71 |
| Myanmar    | MMR | 2000 | 26.45 | 15.00 | 30.91 |
| Myanmar    | MMR | 2001 | 27.83 | 15.99 | 31.97 |
| Myanmar    | MMR | 2002 | 29.50 | 23.55 | 33.56 |
| Myanmar    | MMR | 2003 | 31.05 | 26.34 | 34.84 |
| Myanmar    | MMR | 2004 | 32.36 | 27.97 | 36.00 |
| Myanmar    | MMR | 2005 | 33.99 | 30.02 | 37.46 |
| Myanmar    | MMR | 2006 | 35.22 | 31.28 | 38.70 |
| Myanmar    | MMR | 2007 | 36.80 | 33.10 | 40.11 |
| Myanmar    | MMR | 2008 | 38.28 | 34.66 | 41.44 |
| Myanmar    | MMR | 2009 | 39.55 | 35.87 | 42.57 |
| Myanmar    | MMR | 2010 | 40.76 | 37.12 | 43.79 |
| Myanmar    | MMR | 2011 | 41.71 | 38.15 | 44.75 |
| Myanmar    | MMR | 2012 | 43.09 | 39.73 | 46.11 |
| Myanmar    | MMR | 2013 | 44.60 | 41.28 | 47.61 |
| Myanmar    | MMR | 2014 | 46.36 | 43.09 | 49.37 |
| Myanmar    | MMR | 2015 | 47.38 | 44.09 | 50.40 |
| Myanmar    | MMR | 2016 | 48.46 | 45.03 | 51.57 |
| Myanmar    | MMR | 2017 | 49.44 | 45.98 | 52.60 |
| Montenegro | MNE | 1990 | 63.50 | 58.97 | 66.94 |
| Montenegro | MNE | 1991 | 63.76 | 59.23 | 67.17 |
| Montenegro | MNE | 1992 | 63.90 | 59.56 | 67.22 |
| Montenegro | MNE | 1993 | 63.86 | 59.81 | 67.11 |
| Montenegro | MNE | 1994 | 63.67 | 59.87 | 66.76 |
| Montenegro | MNE | 1995 | 63.65 | 59.99 | 66.69 |
| Montenegro | MNE | 1996 | 63.46 | 59.93 | 66.50 |
| Montenegro | MNE | 1997 | 63.54 | 60.17 | 66.50 |
| Montenegro | MNE | 1998 | 63.36 | 59.88 | 66.31 |
| Montenegro | MNE | 1999 | 63.25 | 59.70 | 66.09 |
| Montenegro | MNE | 2000 | 63.41 | 60.04 | 66.25 |
| Montenegro | MNE | 2001 | 63.92 | 60.73 | 66.67 |
| Montenegro | MNE | 2002 | 64.29 | 61.21 | 67.10 |
| Montenegro | MNE | 2003 | 64.41 | 61.16 | 67.21 |
| Montenegro | MNE | 2004 | 64.54 | 61.00 | 67.36 |
| Montenegro | MNE | 2005 | 64.44 | 60.74 | 67.36 |
| Montenegro | MNE | 2006 | 64.71 | 60.68 | 67.64 |
| Montenegro | MNE | 2007 | 65.24 | 61.02 | 68.29 |
| Montenegro | MNE | 2008 | 65.51 | 60.82 | 68.83 |
| Montenegro | MNE | 2009 | 65.45 | 59.81 | 68.94 |
| Montenegro | MNE | 2010 | 65.16 | 58.19 | 69.15 |
| Montenegro | MNE | 2011 | 64.49 | 55.02 | 69.15 |
| Montenegro | MNE | 2012 | 63.62 | 50.50 | 69.21 |
| Montenegro | MNE | 2013 | 60.66 | 49.86 | 68.22 |
| Montenegro | MNE | 2014 | 59.56 | 49.96 | 68.16 |
| Montenegro | MNE | 2015 | 58.42 | 50.06 | 68.09 |
| Montenegro | MNE | 2016 | 57.51 | 50.03 | 67.99 |
| Montenegro | MNE | 2017 | 57.41 | 50.09 | 68.37 |
| Mongolia   | MNG | 1990 | 35.43 | 30.60 | 39.11 |
| Mongolia   | MNG | 1991 | 33.58 | 27.28 | 37.88 |
| Mongolia   | MNG | 1992 | 32.64 | 25.23 | 37.28 |
| Mongolia   | MNG | 1993 | 29.84 | 23.26 | 35.74 |
| Mongolia   | MNG | 1994 | 27.01 | 22.76 | 33.59 |
| Mongolia   | MNG | 1995 | 24.15 | 22.72 | 28.56 |
| Mongolia   | MNG | 1996 | 23.95 | 22.83 | 25.05 |
| Mongolia   | MNG | 1997 | 24.09 | 22.96 | 25.01 |
| Mongolia   | MNG | 1998 | 24.39 | 23.35 | 25.37 |
| Mongolia   | MNG | 1999 | 24.67 | 23.60 | 25.64 |
| Mongolia   | MNG | 2000 | 24.85 | 23.73 | 26.73 |
| Mongolia   | MNG | 2001 | 25.06 | 23.97 | 26.70 |
| Mongolia   | MNG | 2002 | 25.64 | 24.48 | 29.23 |
| Mongolia   | MNG | 2003 | 26.89 | 25.31 | 32.36 |

|                          |     |      |       |       |       |
|--------------------------|-----|------|-------|-------|-------|
| Mongolia                 | MNG | 2004 | 28.41 | 25.81 | 35.13 |
| Mongolia                 | MNG | 2005 | 30.16 | 26.18 | 36.97 |
| Mongolia                 | MNG | 2006 | 33.86 | 26.88 | 39.93 |
| Mongolia                 | MNG | 2007 | 37.80 | 30.70 | 42.52 |
| Mongolia                 | MNG | 2008 | 41.39 | 36.76 | 45.19 |
| Mongolia                 | MNG | 2009 | 42.46 | 37.94 | 46.10 |
| Mongolia                 | MNG | 2010 | 44.15 | 40.03 | 47.31 |
| Mongolia                 | MNG | 2011 | 46.30 | 42.70 | 49.31 |
| Mongolia                 | MNG | 2012 | 48.38 | 45.05 | 51.16 |
| Mongolia                 | MNG | 2013 | 50.46 | 47.32 | 53.23 |
| Mongolia                 | MNG | 2014 | 52.30 | 49.06 | 55.13 |
| Mongolia                 | MNG | 2015 | 52.89 | 49.42 | 56.01 |
| Mongolia                 | MNG | 2016 | 53.17 | 49.31 | 56.52 |
| Mongolia                 | MNG | 2017 | 53.98 | 49.61 | 57.64 |
| Northern Mariana Island: | MNP | 1990 | 63.13 | 54.06 | 68.23 |
| Northern Mariana Island: | MNP | 1991 | 63.33 | 53.82 | 68.55 |
| Northern Mariana Island: | MNP | 1992 | 63.47 | 52.66 | 68.95 |
| Northern Mariana Island: | MNP | 1993 | 63.66 | 51.66 | 69.35 |
| Northern Mariana Island: | MNP | 1994 | 63.90 | 49.75 | 69.67 |
| Northern Mariana Island: | MNP | 1995 | 64.10 | 48.58 | 69.89 |
| Northern Mariana Island: | MNP | 1996 | 64.09 | 47.65 | 69.97 |
| Northern Mariana Island: | MNP | 1997 | 64.13 | 47.65 | 70.20 |
| Northern Mariana Island: | MNP | 1998 | 63.43 | 47.56 | 70.19 |
| Northern Mariana Island: | MNP | 1999 | 62.67 | 47.78 | 70.23 |
| Northern Mariana Island: | MNP | 2000 | 61.73 | 47.97 | 70.35 |
| Northern Mariana Island: | MNP | 2001 | 61.75 | 48.17 | 70.47 |
| Northern Mariana Island: | MNP | 2002 | 61.22 | 48.24 | 70.49 |
| Northern Mariana Island: | MNP | 2003 | 60.61 | 48.22 | 70.44 |
| Northern Mariana Island: | MNP | 2004 | 60.07 | 48.37 | 70.41 |
| Northern Mariana Island: | MNP | 2005 | 59.86 | 48.32 | 70.29 |
| Northern Mariana Island: | MNP | 2006 | 59.91 | 48.56 | 70.47 |
| Northern Mariana Island: | MNP | 2007 | 60.17 | 48.71 | 70.74 |
| Northern Mariana Island: | MNP | 2008 | 61.13 | 49.00 | 71.31 |
| Northern Mariana Island: | MNP | 2009 | 62.11 | 49.17 | 71.64 |
| Northern Mariana Island: | MNP | 2010 | 63.04 | 49.38 | 72.32 |
| Northern Mariana Island: | MNP | 2011 | 63.98 | 49.64 | 72.71 |
| Northern Mariana Island: | MNP | 2012 | 64.52 | 49.82 | 72.90 |
| Northern Mariana Island: | MNP | 2013 | 64.85 | 49.89 | 73.12 |
| Northern Mariana Island: | MNP | 2014 | 65.30 | 49.92 | 73.36 |
| Northern Mariana Island: | MNP | 2015 | 65.84 | 50.10 | 73.59 |
| Northern Mariana Island: | MNP | 2016 | 66.32 | 50.36 | 73.92 |
| Northern Mariana Island: | MNP | 2017 | 66.51 | 50.44 | 74.19 |
| Mozambique               | MOZ | 1990 | 5.22  | 4.74  | 5.71  |
| Mozambique               | MOZ | 1991 | 5.46  | 5.01  | 6.00  |
| Mozambique               | MOZ | 1992 | 5.77  | 5.21  | 7.11  |
| Mozambique               | MOZ | 1993 | 6.35  | 5.41  | 7.99  |
| Mozambique               | MOZ | 1994 | 7.08  | 5.68  | 8.61  |
| Mozambique               | MOZ | 1995 | 7.74  | 5.92  | 9.17  |
| Mozambique               | MOZ | 1996 | 8.47  | 6.78  | 9.70  |
| Mozambique               | MOZ | 1997 | 9.14  | 7.79  | 10.38 |
| Mozambique               | MOZ | 1998 | 10.00 | 8.70  | 12.36 |
| Mozambique               | MOZ | 1999 | 10.91 | 9.63  | 14.21 |
| Mozambique               | MOZ | 2000 | 11.57 | 10.31 | 16.14 |
| Mozambique               | MOZ | 2001 | 12.33 | 10.99 | 17.39 |
| Mozambique               | MOZ | 2002 | 12.95 | 11.51 | 18.85 |
| Mozambique               | MOZ | 2003 | 13.99 | 12.24 | 20.55 |
| Mozambique               | MOZ | 2004 | 14.72 | 12.52 | 21.73 |
| Mozambique               | MOZ | 2005 | 15.67 | 12.69 | 22.78 |
| Mozambique               | MOZ | 2006 | 16.95 | 13.06 | 24.00 |
| Mozambique               | MOZ | 2007 | 18.22 | 13.14 | 24.90 |
| Mozambique               | MOZ | 2008 | 19.68 | 13.35 | 25.79 |
| Mozambique               | MOZ | 2009 | 21.28 | 13.62 | 26.86 |

|            |     |      |       |       |       |
|------------|-----|------|-------|-------|-------|
| Mozambique | MOZ | 2010 | 22.29 | 13.92 | 27.66 |
| Mozambique | MOZ | 2011 | 23.56 | 14.31 | 28.62 |
| Mozambique | MOZ | 2012 | 24.72 | 14.77 | 29.48 |
| Mozambique | MOZ | 2013 | 25.97 | 15.14 | 30.58 |
| Mozambique | MOZ | 2014 | 27.11 | 15.71 | 31.63 |
| Mozambique | MOZ | 2015 | 28.16 | 16.24 | 32.57 |
| Mozambique | MOZ | 2016 | 29.30 | 17.71 | 33.63 |
| Mozambique | MOZ | 2017 | 30.37 | 23.72 | 34.66 |
| Mauritania | MRT | 1990 | 15.74 | 9.54  | 18.48 |
| Mauritania | MRT | 1991 | 16.80 | 12.53 | 19.40 |
| Mauritania | MRT | 1992 | 17.76 | 14.68 | 20.31 |
| Mauritania | MRT | 1993 | 18.68 | 15.92 | 21.15 |
| Mauritania | MRT | 1994 | 19.37 | 16.82 | 21.72 |
| Mauritania | MRT | 1995 | 20.05 | 17.46 | 22.46 |
| Mauritania | MRT | 1996 | 20.68 | 18.22 | 23.03 |
| Mauritania | MRT | 1997 | 21.28 | 18.76 | 23.60 |
| Mauritania | MRT | 1998 | 22.08 | 19.64 | 24.31 |
| Mauritania | MRT | 1999 | 22.90 | 20.58 | 25.15 |
| Mauritania | MRT | 2000 | 23.69 | 21.32 | 25.86 |
| Mauritania | MRT | 2001 | 24.39 | 22.04 | 26.48 |
| Mauritania | MRT | 2002 | 25.66 | 23.36 | 27.76 |
| Mauritania | MRT | 2003 | 26.19 | 23.88 | 28.30 |
| Mauritania | MRT | 2004 | 26.70 | 24.45 | 28.78 |
| Mauritania | MRT | 2005 | 27.31 | 25.16 | 29.37 |
| Mauritania | MRT | 2006 | 27.99 | 25.80 | 29.99 |
| Mauritania | MRT | 2007 | 28.59 | 26.31 | 30.63 |
| Mauritania | MRT | 2008 | 28.97 | 26.73 | 30.98 |
| Mauritania | MRT | 2009 | 29.35 | 27.12 | 31.34 |
| Mauritania | MRT | 2010 | 29.74 | 27.53 | 31.77 |
| Mauritania | MRT | 2011 | 30.14 | 27.95 | 32.21 |
| Mauritania | MRT | 2012 | 30.59 | 28.31 | 32.71 |
| Mauritania | MRT | 2013 | 31.15 | 28.93 | 33.26 |
| Mauritania | MRT | 2014 | 31.70 | 29.45 | 33.92 |
| Mauritania | MRT | 2015 | 32.27 | 30.00 | 34.48 |
| Mauritania | MRT | 2016 | 32.72 | 30.45 | 34.92 |
| Mauritania | MRT | 2017 | 33.11 | 30.87 | 35.37 |
| Mauritius  | MUS | 1990 | 41.17 | 38.61 | 43.38 |
| Mauritius  | MUS | 1991 | 42.56 | 39.92 | 44.83 |
| Mauritius  | MUS | 1992 | 42.75 | 40.19 | 44.96 |
| Mauritius  | MUS | 1993 | 43.04 | 40.57 | 45.28 |
| Mauritius  | MUS | 1994 | 43.87 | 41.42 | 46.21 |
| Mauritius  | MUS | 1995 | 45.16 | 42.66 | 47.50 |
| Mauritius  | MUS | 1996 | 46.15 | 43.57 | 48.50 |
| Mauritius  | MUS | 1997 | 46.33 | 43.84 | 48.71 |
| Mauritius  | MUS | 1998 | 47.37 | 44.82 | 49.71 |
| Mauritius  | MUS | 1999 | 47.76 | 45.20 | 50.18 |
| Mauritius  | MUS | 2000 | 49.07 | 46.37 | 51.64 |
| Mauritius  | MUS | 2001 | 49.56 | 46.96 | 52.18 |
| Mauritius  | MUS | 2002 | 50.00 | 47.36 | 52.68 |
| Mauritius  | MUS | 2003 | 50.76 | 47.97 | 53.53 |
| Mauritius  | MUS | 2004 | 51.92 | 48.94 | 54.72 |
| Mauritius  | MUS | 2005 | 52.73 | 49.68 | 55.57 |
| Mauritius  | MUS | 2006 | 53.77 | 50.65 | 56.65 |
| Mauritius  | MUS | 2007 | 54.81 | 51.52 | 57.76 |
| Mauritius  | MUS | 2008 | 55.12 | 51.84 | 58.09 |
| Mauritius  | MUS | 2009 | 55.58 | 52.25 | 58.59 |
| Mauritius  | MUS | 2010 | 56.81 | 53.37 | 59.81 |
| Mauritius  | MUS | 2011 | 57.77 | 54.17 | 60.77 |
| Mauritius  | MUS | 2012 | 58.19 | 54.58 | 61.21 |
| Mauritius  | MUS | 2013 | 59.25 | 55.43 | 62.34 |
| Mauritius  | MUS | 2014 | 59.35 | 55.43 | 62.45 |
| Mauritius  | MUS | 2015 | 59.61 | 55.67 | 62.74 |

|           |     |      |       |       |       |
|-----------|-----|------|-------|-------|-------|
| Mauritius | MUS | 2016 | 60.00 | 55.86 | 63.20 |
| Mauritius | MUS | 2017 | 60.51 | 56.28 | 63.93 |
| Malawi    | MWI | 1990 | 24.41 | 13.93 | 33.27 |
| Malawi    | MWI | 1991 | 24.97 | 14.23 | 33.62 |
| Malawi    | MWI | 1992 | 25.02 | 14.28 | 32.60 |
| Malawi    | MWI | 1993 | 25.23 | 14.47 | 31.71 |
| Malawi    | MWI | 1994 | 25.12 | 14.50 | 30.36 |
| Malawi    | MWI | 1995 | 25.16 | 14.43 | 29.77 |
| Malawi    | MWI | 1996 | 25.48 | 14.54 | 29.81 |
| Malawi    | MWI | 1997 | 25.98 | 14.75 | 30.18 |
| Malawi    | MWI | 1998 | 26.21 | 14.88 | 30.24 |
| Malawi    | MWI | 1999 | 27.28 | 15.36 | 31.44 |
| Malawi    | MWI | 2000 | 27.92 | 15.69 | 32.03 |
| Malawi    | MWI | 2001 | 28.96 | 16.26 | 33.30 |
| Malawi    | MWI | 2002 | 29.84 | 16.77 | 34.13 |
| Malawi    | MWI | 2003 | 31.10 | 18.03 | 35.33 |
| Malawi    | MWI | 2004 | 32.63 | 27.01 | 36.76 |
| Malawi    | MWI | 2005 | 34.01 | 29.22 | 38.12 |
| Malawi    | MWI | 2006 | 35.51 | 31.02 | 39.36 |
| Malawi    | MWI | 2007 | 37.02 | 32.89 | 40.79 |
| Malawi    | MWI | 2008 | 38.38 | 34.26 | 41.95 |
| Malawi    | MWI | 2009 | 39.43 | 35.27 | 42.86 |
| Malawi    | MWI | 2010 | 40.09 | 35.95 | 43.65 |
| Malawi    | MWI | 2011 | 41.35 | 37.13 | 44.91 |
| Malawi    | MWI | 2012 | 42.58 | 38.71 | 46.26 |
| Malawi    | MWI | 2013 | 43.65 | 39.76 | 47.36 |
| Malawi    | MWI | 2014 | 44.40 | 40.53 | 48.20 |
| Malawi    | MWI | 2015 | 44.96 | 41.22 | 48.88 |
| Malawi    | MWI | 2016 | 45.41 | 41.68 | 49.38 |
| Malawi    | MWI | 2017 | 46.12 | 42.23 | 50.01 |
| Malaysia  | MYS | 1990 | 45.16 | 42.86 | 47.19 |
| Malaysia  | MYS | 1991 | 46.27 | 44.05 | 48.24 |
| Malaysia  | MYS | 1992 | 47.23 | 45.04 | 49.23 |
| Malaysia  | MYS | 1993 | 48.30 | 46.12 | 50.37 |
| Malaysia  | MYS | 1994 | 49.33 | 47.18 | 51.33 |
| Malaysia  | MYS | 1995 | 49.69 | 47.58 | 51.66 |
| Malaysia  | MYS | 1996 | 50.47 | 48.38 | 52.51 |
| Malaysia  | MYS | 1997 | 51.19 | 49.01 | 53.19 |
| Malaysia  | MYS | 1998 | 52.41 | 50.19 | 54.47 |
| Malaysia  | MYS | 1999 | 52.84 | 50.50 | 54.96 |
| Malaysia  | MYS | 2000 | 53.46 | 51.09 | 55.62 |
| Malaysia  | MYS | 2001 | 54.53 | 51.92 | 56.74 |
| Malaysia  | MYS | 2002 | 55.30 | 52.52 | 57.62 |
| Malaysia  | MYS | 2003 | 55.64 | 52.69 | 58.19 |
| Malaysia  | MYS | 2004 | 56.35 | 53.05 | 59.10 |
| Malaysia  | MYS | 2005 | 57.39 | 53.79 | 60.24 |
| Malaysia  | MYS | 2006 | 58.21 | 54.27 | 61.29 |
| Malaysia  | MYS | 2007 | 58.94 | 54.91 | 62.06 |
| Malaysia  | MYS | 2008 | 59.15 | 55.09 | 62.40 |
| Malaysia  | MYS | 2009 | 59.28 | 55.02 | 62.62 |
| Malaysia  | MYS | 2010 | 60.12 | 55.84 | 63.64 |
| Malaysia  | MYS | 2011 | 61.14 | 56.60 | 64.74 |
| Malaysia  | MYS | 2012 | 61.41 | 56.45 | 65.20 |
| Malaysia  | MYS | 2013 | 61.78 | 56.41 | 65.76 |
| Malaysia  | MYS | 2014 | 61.31 | 55.46 | 65.48 |
| Malaysia  | MYS | 2015 | 61.34 | 54.86 | 65.69 |
| Malaysia  | MYS | 2016 | 61.52 | 54.30 | 66.01 |
| Malaysia  | MYS | 2017 | 61.69 | 53.17 | 66.61 |
| Namibia   | NAM | 1990 | 32.39 | 17.46 | 37.27 |
| Namibia   | NAM | 1991 | 33.43 | 18.05 | 37.95 |
| Namibia   | NAM | 1992 | 34.25 | 26.68 | 38.62 |
| Namibia   | NAM | 1993 | 35.00 | 28.90 | 39.32 |

|         |     |      |       |       |       |
|---------|-----|------|-------|-------|-------|
| Namibia | NAM | 1994 | 35.45 | 30.20 | 39.49 |
| Namibia | NAM | 1995 | 35.62 | 30.55 | 39.61 |
| Namibia | NAM | 1996 | 35.74 | 30.81 | 39.61 |
| Namibia | NAM | 1997 | 35.87 | 31.38 | 39.71 |
| Namibia | NAM | 1998 | 35.94 | 31.58 | 39.79 |
| Namibia | NAM | 1999 | 36.34 | 32.17 | 40.16 |
| Namibia | NAM | 2000 | 36.51 | 32.50 | 40.23 |
| Namibia | NAM | 2001 | 37.36 | 33.49 | 41.12 |
| Namibia | NAM | 2002 | 37.77 | 33.81 | 41.56 |
| Namibia | NAM | 2003 | 38.97 | 34.93 | 42.97 |
| Namibia | NAM | 2004 | 40.40 | 36.20 | 44.48 |
| Namibia | NAM | 2005 | 41.97 | 37.79 | 46.26 |
| Namibia | NAM | 2006 | 43.68 | 39.48 | 47.93 |
| Namibia | NAM | 2007 | 45.51 | 41.69 | 49.63 |
| Namibia | NAM | 2008 | 47.20 | 43.41 | 51.08 |
| Namibia | NAM | 2009 | 48.53 | 44.78 | 52.37 |
| Namibia | NAM | 2010 | 50.12 | 46.27 | 53.84 |
| Namibia | NAM | 2011 | 51.85 | 48.17 | 55.44 |
| Namibia | NAM | 2012 | 53.12 | 49.45 | 56.60 |
| Namibia | NAM | 2013 | 54.53 | 50.94 | 57.92 |
| Namibia | NAM | 2014 | 55.54 | 51.79 | 58.97 |
| Namibia | NAM | 2015 | 56.28 | 52.32 | 59.80 |
| Namibia | NAM | 2016 | 56.98 | 52.87 | 60.55 |
| Namibia | NAM | 2017 | 57.95 | 53.91 | 61.59 |
| Niger   | NER | 1990 | 4.51  | 3.43  | 7.00  |
| Niger   | NER | 1991 | 4.57  | 3.47  | 7.08  |
| Niger   | NER | 1992 | 4.61  | 3.48  | 7.16  |
| Niger   | NER | 1993 | 4.68  | 3.50  | 7.26  |
| Niger   | NER | 1994 | 4.78  | 3.48  | 7.40  |
| Niger   | NER | 1995 | 4.90  | 3.49  | 7.71  |
| Niger   | NER | 1996 | 5.20  | 3.62  | 8.33  |
| Niger   | NER | 1997 | 5.45  | 3.78  | 8.90  |
| Niger   | NER | 1998 | 5.64  | 3.83  | 9.25  |
| Niger   | NER | 1999 | 6.10  | 4.00  | 9.90  |
| Niger   | NER | 2000 | 6.29  | 4.08  | 10.26 |
| Niger   | NER | 2001 | 6.67  | 4.20  | 10.67 |
| Niger   | NER | 2002 | 7.31  | 4.48  | 11.35 |
| Niger   | NER | 2003 | 7.95  | 5.51  | 12.13 |
| Niger   | NER | 2004 | 8.89  | 6.45  | 13.29 |
| Niger   | NER | 2005 | 9.36  | 6.78  | 13.95 |
| Niger   | NER | 2006 | 9.57  | 7.08  | 14.33 |
| Niger   | NER | 2007 | 10.02 | 7.35  | 14.88 |
| Niger   | NER | 2008 | 10.35 | 7.56  | 15.27 |
| Niger   | NER | 2009 | 10.77 | 7.74  | 15.64 |
| Niger   | NER | 2010 | 11.15 | 7.91  | 16.01 |
| Niger   | NER | 2011 | 11.50 | 8.04  | 16.32 |
| Niger   | NER | 2012 | 12.09 | 8.26  | 16.74 |
| Niger   | NER | 2013 | 12.52 | 8.45  | 17.14 |
| Niger   | NER | 2014 | 12.89 | 8.51  | 17.47 |
| Niger   | NER | 2015 | 13.39 | 8.67  | 17.82 |
| Niger   | NER | 2016 | 13.80 | 8.71  | 18.11 |
| Niger   | NER | 2017 | 14.62 | 8.92  | 19.37 |
| Nigeria | NGA | 1990 | 30.92 | 25.55 | 35.73 |
| Nigeria | NGA | 1991 | 31.32 | 26.05 | 36.25 |
| Nigeria | NGA | 1992 | 31.58 | 26.25 | 36.32 |
| Nigeria | NGA | 1993 | 31.85 | 26.72 | 36.76 |
| Nigeria | NGA | 1994 | 32.29 | 26.82 | 37.45 |
| Nigeria | NGA | 1995 | 32.63 | 27.18 | 37.74 |
| Nigeria | NGA | 1996 | 33.03 | 27.30 | 38.14 |
| Nigeria | NGA | 1997 | 33.48 | 27.69 | 38.85 |
| Nigeria | NGA | 1998 | 34.03 | 28.28 | 39.35 |
| Nigeria | NGA | 1999 | 34.65 | 28.68 | 40.03 |

|             |     |      |       |       |       |
|-------------|-----|------|-------|-------|-------|
| Nigeria     | NGA | 2000 | 35.58 | 29.86 | 40.89 |
| Nigeria     | NGA | 2001 | 36.42 | 30.57 | 41.83 |
| Nigeria     | NGA | 2002 | 37.47 | 31.47 | 42.89 |
| Nigeria     | NGA | 2003 | 38.89 | 32.94 | 44.24 |
| Nigeria     | NGA | 2004 | 40.42 | 34.63 | 45.62 |
| Nigeria     | NGA | 2005 | 42.02 | 36.15 | 47.04 |
| Nigeria     | NGA | 2006 | 43.16 | 37.38 | 47.85 |
| Nigeria     | NGA | 2007 | 44.35 | 38.65 | 48.90 |
| Nigeria     | NGA | 2008 | 45.50 | 40.02 | 49.89 |
| Nigeria     | NGA | 2009 | 46.53 | 40.94 | 50.99 |
| Nigeria     | NGA | 2010 | 47.38 | 41.84 | 51.65 |
| Nigeria     | NGA | 2011 | 47.92 | 42.45 | 52.15 |
| Nigeria     | NGA | 2012 | 48.12 | 42.41 | 52.34 |
| Nigeria     | NGA | 2013 | 48.28 | 42.60 | 52.58 |
| Nigeria     | NGA | 2014 | 48.26 | 42.54 | 52.59 |
| Nigeria     | NGA | 2015 | 48.72 | 43.08 | 53.07 |
| Nigeria     | NGA | 2016 | 48.61 | 42.82 | 53.09 |
| Nigeria     | NGA | 2017 | 48.98 | 43.46 | 53.65 |
| Nicaragua   | NIC | 1990 | 37.08 | 21.86 | 44.62 |
| Nicaragua   | NIC | 1991 | 37.59 | 21.80 | 44.79 |
| Nicaragua   | NIC | 1992 | 38.63 | 21.94 | 45.30 |
| Nicaragua   | NIC | 1993 | 39.59 | 22.21 | 45.90 |
| Nicaragua   | NIC | 1994 | 40.87 | 22.60 | 46.74 |
| Nicaragua   | NIC | 1995 | 41.79 | 22.78 | 47.18 |
| Nicaragua   | NIC | 1996 | 42.70 | 23.02 | 47.86 |
| Nicaragua   | NIC | 1997 | 43.45 | 23.38 | 48.83 |
| Nicaragua   | NIC | 1998 | 44.59 | 23.86 | 49.91 |
| Nicaragua   | NIC | 1999 | 46.27 | 24.44 | 50.88 |
| Nicaragua   | NIC | 2000 | 46.69 | 24.57 | 51.54 |
| Nicaragua   | NIC | 2001 | 47.28 | 24.80 | 52.15 |
| Nicaragua   | NIC | 2002 | 48.24 | 25.26 | 52.90 |
| Nicaragua   | NIC | 2003 | 49.83 | 40.53 | 54.34 |
| Nicaragua   | NIC | 2004 | 51.01 | 43.77 | 55.29 |
| Nicaragua   | NIC | 2005 | 52.09 | 45.42 | 56.26 |
| Nicaragua   | NIC | 2006 | 53.82 | 47.86 | 57.79 |
| Nicaragua   | NIC | 2007 | 54.93 | 49.69 | 58.81 |
| Nicaragua   | NIC | 2008 | 56.13 | 50.91 | 59.89 |
| Nicaragua   | NIC | 2009 | 57.27 | 52.65 | 60.76 |
| Nicaragua   | NIC | 2010 | 58.44 | 54.03 | 61.98 |
| Nicaragua   | NIC | 2011 | 59.21 | 54.99 | 62.59 |
| Nicaragua   | NIC | 2012 | 59.91 | 56.13 | 63.28 |
| Nicaragua   | NIC | 2013 | 60.50 | 56.56 | 63.80 |
| Nicaragua   | NIC | 2014 | 60.73 | 57.05 | 64.11 |
| Nicaragua   | NIC | 2015 | 61.95 | 58.24 | 65.27 |
| Nicaragua   | NIC | 2016 | 62.82 | 58.96 | 66.07 |
| Nicaragua   | NIC | 2017 | 63.39 | 59.41 | 66.94 |
| Netherlands | NLD | 1990 | 79.35 | 76.89 | 81.27 |
| Netherlands | NLD | 1991 | 79.77 | 77.25 | 81.70 |
| Netherlands | NLD | 1992 | 80.21 | 77.54 | 82.21 |
| Netherlands | NLD | 1993 | 79.97 | 77.28 | 82.00 |
| Netherlands | NLD | 1994 | 80.73 | 77.94 | 82.87 |
| Netherlands | NLD | 1995 | 81.17 | 78.32 | 83.33 |
| Netherlands | NLD | 1996 | 81.94 | 79.01 | 84.13 |
| Netherlands | NLD | 1997 | 82.66 | 79.67 | 84.91 |
| Netherlands | NLD | 1998 | 83.10 | 79.95 | 85.34 |
| Netherlands | NLD | 1999 | 83.28 | 80.31 | 85.49 |
| Netherlands | NLD | 2000 | 83.83 | 80.85 | 86.07 |
| Netherlands | NLD | 2001 | 84.44 | 81.40 | 86.65 |
| Netherlands | NLD | 2002 | 85.00 | 81.95 | 87.24 |
| Netherlands | NLD | 2003 | 85.68 | 82.67 | 87.84 |
| Netherlands | NLD | 2004 | 86.78 | 83.67 | 88.97 |
| Netherlands | NLD | 2005 | 88.01 | 85.01 | 90.18 |

|             |     |      |       |       |       |
|-------------|-----|------|-------|-------|-------|
| Netherlands | NLD | 2006 | 88.72 | 85.60 | 90.94 |
| Netherlands | NLD | 2007 | 89.40 | 86.20 | 91.71 |
| Netherlands | NLD | 2008 | 89.70 | 86.36 | 91.92 |
| Netherlands | NLD | 2009 | 89.95 | 86.24 | 92.32 |
| Netherlands | NLD | 2010 | 90.02 | 86.05 | 92.53 |
| Netherlands | NLD | 2011 | 90.14 | 85.99 | 92.76 |
| Netherlands | NLD | 2012 | 90.32 | 86.06 | 93.00 |
| Netherlands | NLD | 2013 | 90.69 | 86.32 | 93.47 |
| Netherlands | NLD | 2014 | 91.15 | 86.51 | 94.01 |
| Netherlands | NLD | 2015 | 91.13 | 86.55 | 94.09 |
| Netherlands | NLD | 2016 | 91.02 | 86.52 | 94.04 |
| Netherlands | NLD | 2017 | 90.94 | 86.19 | 94.20 |
| Norway      | NOR | 1990 | 82.06 | 78.81 | 84.36 |
| Norway      | NOR | 1991 | 82.59 | 79.40 | 84.90 |
| Norway      | NOR | 1992 | 82.84 | 79.48 | 85.26 |
| Norway      | NOR | 1993 | 83.31 | 79.65 | 85.81 |
| Norway      | NOR | 1994 | 83.59 | 79.76 | 86.19 |
| Norway      | NOR | 1995 | 83.85 | 79.91 | 86.56 |
| Norway      | NOR | 1996 | 84.87 | 80.65 | 87.66 |
| Norway      | NOR | 1997 | 85.11 | 80.61 | 88.04 |
| Norway      | NOR | 1998 | 85.07 | 80.29 | 88.21 |
| Norway      | NOR | 1999 | 85.47 | 80.54 | 88.82 |
| Norway      | NOR | 2000 | 85.70 | 80.62 | 89.16 |
| Norway      | NOR | 2001 | 86.27 | 80.94 | 89.90 |
| Norway      | NOR | 2002 | 86.60 | 80.81 | 90.35 |
| Norway      | NOR | 2003 | 87.51 | 81.80 | 91.23 |
| Norway      | NOR | 2004 | 88.18 | 82.51 | 91.91 |
| Norway      | NOR | 2005 | 88.69 | 82.97 | 92.42 |
| Norway      | NOR | 2006 | 89.09 | 82.89 | 92.87 |
| Norway      | NOR | 2007 | 89.39 | 82.61 | 93.21 |
| Norway      | NOR | 2008 | 89.34 | 82.17 | 93.38 |
| Norway      | NOR | 2009 | 89.06 | 81.54 | 93.38 |
| Norway      | NOR | 2010 | 88.90 | 81.21 | 93.46 |
| Norway      | NOR | 2011 | 88.59 | 80.23 | 93.36 |
| Norway      | NOR | 2012 | 88.98 | 79.86 | 93.86 |
| Norway      | NOR | 2013 | 88.87 | 80.15 | 93.87 |
| Norway      | NOR | 2014 | 88.43 | 78.85 | 93.67 |
| Norway      | NOR | 2015 | 88.01 | 77.61 | 93.41 |
| Norway      | NOR | 2016 | 87.73 | 76.83 | 93.21 |
| Norway      | NOR | 2017 | 87.68 | 76.60 | 93.14 |
| Nepal       | NPL | 1990 | 10.79 | 5.82  | 13.91 |
| Nepal       | NPL | 1991 | 11.98 | 6.58  | 15.13 |
| Nepal       | NPL | 1992 | 13.95 | 7.59  | 17.11 |
| Nepal       | NPL | 1993 | 15.77 | 8.72  | 18.86 |
| Nepal       | NPL | 1994 | 17.71 | 9.70  | 20.68 |
| Nepal       | NPL | 1995 | 19.62 | 10.67 | 22.59 |
| Nepal       | NPL | 1996 | 21.82 | 11.96 | 24.69 |
| Nepal       | NPL | 1997 | 24.06 | 20.22 | 26.84 |
| Nepal       | NPL | 1998 | 26.03 | 22.47 | 28.66 |
| Nepal       | NPL | 1999 | 27.85 | 24.38 | 30.52 |
| Nepal       | NPL | 2000 | 29.46 | 26.10 | 32.12 |
| Nepal       | NPL | 2001 | 31.25 | 27.99 | 33.94 |
| Nepal       | NPL | 2002 | 32.65 | 29.55 | 35.36 |
| Nepal       | NPL | 2003 | 34.13 | 31.05 | 36.84 |
| Nepal       | NPL | 2004 | 35.71 | 32.48 | 38.54 |
| Nepal       | NPL | 2005 | 36.94 | 33.68 | 39.78 |
| Nepal       | NPL | 2006 | 38.17 | 35.00 | 41.13 |
| Nepal       | NPL | 2007 | 39.20 | 36.02 | 42.23 |
| Nepal       | NPL | 2008 | 40.36 | 37.35 | 43.48 |
| Nepal       | NPL | 2009 | 41.42 | 38.34 | 44.59 |
| Nepal       | NPL | 2010 | 42.49 | 39.43 | 45.80 |
| Nepal       | NPL | 2011 | 43.43 | 40.42 | 46.87 |



|             |     |      |       |       |       |
|-------------|-----|------|-------|-------|-------|
| Nepal       | NPL | 2012 | 44.45 | 41.40 | 47.71 |
| Nepal       | NPL | 2013 | 45.65 | 42.59 | 49.01 |
| Nepal       | NPL | 2014 | 46.72 | 43.62 | 50.01 |
| Nepal       | NPL | 2015 | 47.56 | 44.48 | 50.91 |
| Nepal       | NPL | 2016 | 48.45 | 45.19 | 51.90 |
| Nepal       | NPL | 2017 | 49.44 | 46.09 | 52.92 |
| New Zealand | NZL | 1990 | 76.57 | 73.10 | 78.97 |
| New Zealand | NZL | 1991 | 77.07 | 73.58 | 79.72 |
| New Zealand | NZL | 1992 | 77.31 | 73.49 | 80.15 |
| New Zealand | NZL | 1993 | 77.64 | 73.60 | 80.58 |
| New Zealand | NZL | 1994 | 78.61 | 74.43 | 81.69 |
| New Zealand | NZL | 1995 | 78.07 | 73.84 | 81.29 |
| New Zealand | NZL | 1996 | 79.01 | 74.34 | 82.45 |
| New Zealand | NZL | 1997 | 79.52 | 74.57 | 83.13 |
| New Zealand | NZL | 1998 | 80.05 | 74.68 | 83.98 |
| New Zealand | NZL | 1999 | 79.89 | 74.24 | 84.02 |
| New Zealand | NZL | 2000 | 80.46 | 73.83 | 84.87 |
| New Zealand | NZL | 2001 | 80.76 | 73.32 | 85.44 |
| New Zealand | NZL | 2002 | 80.58 | 72.57 | 85.40 |
| New Zealand | NZL | 2003 | 81.35 | 73.38 | 86.09 |
| New Zealand | NZL | 2004 | 82.23 | 74.24 | 86.89 |
| New Zealand | NZL | 2005 | 82.84 | 74.71 | 87.38 |
| New Zealand | NZL | 2006 | 83.10 | 74.96 | 87.77 |
| New Zealand | NZL | 2007 | 83.04 | 75.02 | 87.76 |
| New Zealand | NZL | 2008 | 83.23 | 74.67 | 88.16 |
| New Zealand | NZL | 2009 | 83.26 | 74.70 | 88.50 |
| New Zealand | NZL | 2010 | 83.30 | 74.26 | 88.84 |
| New Zealand | NZL | 2011 | 82.97 | 71.36 | 89.10 |
| New Zealand | NZL | 2012 | 82.60 | 65.89 | 89.20 |
| New Zealand | NZL | 2013 | 82.36 | 62.24 | 89.41 |
| New Zealand | NZL | 2014 | 81.83 | 62.39 | 89.39 |
| New Zealand | NZL | 2015 | 81.50 | 62.58 | 89.59 |
| New Zealand | NZL | 2016 | 80.77 | 62.48 | 89.38 |
| New Zealand | NZL | 2017 | 80.26 | 62.36 | 89.28 |
| Oman        | OMN | 1990 | 40.84 | 37.33 | 44.15 |
| Oman        | OMN | 1991 | 41.86 | 38.44 | 45.19 |
| Oman        | OMN | 1992 | 43.00 | 39.47 | 46.36 |
| Oman        | OMN | 1993 | 44.23 | 40.77 | 47.73 |
| Oman        | OMN | 1994 | 45.29 | 41.90 | 48.79 |
| Oman        | OMN | 1995 | 46.41 | 42.98 | 49.88 |
| Oman        | OMN | 1996 | 47.69 | 44.29 | 51.21 |
| Oman        | OMN | 1997 | 48.97 | 45.51 | 52.38 |
| Oman        | OMN | 1998 | 50.09 | 46.54 | 53.42 |
| Oman        | OMN | 1999 | 50.88 | 47.13 | 54.27 |
| Oman        | OMN | 2000 | 52.02 | 48.09 | 55.51 |
| Oman        | OMN | 2001 | 53.04 | 49.14 | 56.62 |
| Oman        | OMN | 2002 | 53.87 | 49.83 | 57.57 |
| Oman        | OMN | 2003 | 54.53 | 50.23 | 58.30 |
| Oman        | OMN | 2004 | 54.86 | 50.03 | 58.76 |
| Oman        | OMN | 2005 | 55.35 | 49.99 | 59.50 |
| Oman        | OMN | 2006 | 55.83 | 49.22 | 60.13 |
| Oman        | OMN | 2007 | 56.74 | 49.56 | 61.04 |
| Oman        | OMN | 2008 | 56.93 | 47.90 | 61.70 |
| Oman        | OMN | 2009 | 57.49 | 47.15 | 62.55 |
| Oman        | OMN | 2010 | 58.16 | 46.01 | 63.50 |
| Oman        | OMN | 2011 | 58.57 | 44.22 | 64.37 |
| Oman        | OMN | 2012 | 59.24 | 44.51 | 65.49 |
| Oman        | OMN | 2013 | 59.13 | 44.94 | 66.49 |
| Oman        | OMN | 2014 | 58.50 | 45.36 | 67.01 |
| Oman        | OMN | 2015 | 58.14 | 45.60 | 67.58 |
| Oman        | OMN | 2016 | 58.34 | 46.35 | 68.43 |
| Oman        | OMN | 2017 | 58.65 | 46.69 | 68.89 |

|          |     |      |       |       |       |
|----------|-----|------|-------|-------|-------|
| Pakistan | PAK | 1990 | 23.58 | 20.89 | 25.93 |
| Pakistan | PAK | 1991 | 23.67 | 20.95 | 26.08 |
| Pakistan | PAK | 1992 | 23.97 | 21.39 | 26.42 |
| Pakistan | PAK | 1993 | 24.12 | 21.49 | 26.51 |
| Pakistan | PAK | 1994 | 24.17 | 21.61 | 26.73 |
| Pakistan | PAK | 1995 | 24.10 | 21.56 | 26.58 |
| Pakistan | PAK | 1996 | 24.50 | 22.05 | 27.10 |
| Pakistan | PAK | 1997 | 24.80 | 22.45 | 27.29 |
| Pakistan | PAK | 1998 | 25.44 | 22.90 | 27.89 |
| Pakistan | PAK | 1999 | 26.16 | 23.60 | 28.64 |
| Pakistan | PAK | 2000 | 26.99 | 24.40 | 29.48 |
| Pakistan | PAK | 2001 | 27.65 | 25.10 | 30.04 |
| Pakistan | PAK | 2002 | 28.75 | 26.26 | 31.20 |
| Pakistan | PAK | 2003 | 29.16 | 26.63 | 31.54 |
| Pakistan | PAK | 2004 | 29.67 | 27.19 | 32.01 |
| Pakistan | PAK | 2005 | 30.14 | 27.56 | 32.55 |
| Pakistan | PAK | 2006 | 30.85 | 28.12 | 33.29 |
| Pakistan | PAK | 2007 | 31.62 | 28.77 | 34.17 |
| Pakistan | PAK | 2008 | 32.20 | 29.20 | 34.84 |
| Pakistan | PAK | 2009 | 33.02 | 29.98 | 35.84 |
| Pakistan | PAK | 2010 | 33.82 | 30.72 | 36.77 |
| Pakistan | PAK | 2011 | 34.67 | 31.42 | 37.84 |
| Pakistan | PAK | 2012 | 35.50 | 31.99 | 38.83 |
| Pakistan | PAK | 2013 | 36.43 | 32.66 | 39.87 |
| Pakistan | PAK | 2014 | 37.31 | 33.44 | 40.97 |
| Pakistan | PAK | 2015 | 38.42 | 34.31 | 42.21 |
| Pakistan | PAK | 2016 | 39.51 | 35.21 | 43.37 |
| Pakistan | PAK | 2017 | 40.61 | 36.11 | 44.58 |
| Panama   | PAN | 1990 | 63.63 | 60.78 | 66.15 |
| Panama   | PAN | 1991 | 64.69 | 61.91 | 67.13 |
| Panama   | PAN | 1992 | 64.90 | 62.20 | 67.27 |
| Panama   | PAN | 1993 | 65.25 | 62.62 | 67.56 |
| Panama   | PAN | 1994 | 66.25 | 63.75 | 68.60 |
| Panama   | PAN | 1995 | 66.59 | 64.07 | 68.86 |
| Panama   | PAN | 1996 | 67.37 | 64.87 | 69.63 |
| Panama   | PAN | 1997 | 67.67 | 65.23 | 69.92 |
| Panama   | PAN | 1998 | 68.70 | 66.26 | 70.85 |
| Panama   | PAN | 1999 | 70.66 | 68.21 | 72.74 |
| Panama   | PAN | 2000 | 71.92 | 69.63 | 73.95 |
| Panama   | PAN | 2001 | 72.66 | 70.41 | 74.67 |
| Panama   | PAN | 2002 | 73.16 | 70.99 | 75.08 |
| Panama   | PAN | 2003 | 73.67 | 71.43 | 75.59 |
| Panama   | PAN | 2004 | 74.26 | 71.93 | 76.33 |
| Panama   | PAN | 2005 | 74.32 | 71.98 | 76.38 |
| Panama   | PAN | 2006 | 74.58 | 72.22 | 76.69 |
| Panama   | PAN | 2007 | 74.98 | 72.43 | 77.12 |
| Panama   | PAN | 2008 | 75.22 | 72.69 | 77.40 |
| Panama   | PAN | 2009 | 75.71 | 73.09 | 77.94 |
| Panama   | PAN | 2010 | 76.35 | 73.61 | 78.67 |
| Panama   | PAN | 2011 | 76.33 | 73.39 | 78.70 |
| Panama   | PAN | 2012 | 76.28 | 73.18 | 78.81 |
| Panama   | PAN | 2013 | 76.62 | 73.33 | 79.21 |
| Panama   | PAN | 2014 | 76.98 | 73.64 | 79.67 |
| Panama   | PAN | 2015 | 77.62 | 74.04 | 80.37 |
| Panama   | PAN | 2016 | 78.11 | 74.34 | 80.96 |
| Panama   | PAN | 2017 | 78.66 | 74.90 | 81.72 |
| Peru     | PER | 1990 | 54.94 | 52.18 | 57.39 |
| Peru     | PER | 1991 | 55.81 | 53.06 | 58.34 |
| Peru     | PER | 1992 | 54.88 | 52.22 | 57.48 |
| Peru     | PER | 1993 | 55.56 | 52.81 | 57.96 |
| Peru     | PER | 1994 | 56.22 | 53.45 | 58.66 |
| Peru     | PER | 1995 | 56.44 | 53.52 | 58.89 |

|                  |     |      |       |       |       |
|------------------|-----|------|-------|-------|-------|
| Peru             | PER | 1996 | 57.24 | 54.46 | 59.75 |
| Peru             | PER | 1997 | 58.16 | 55.21 | 60.71 |
| Peru             | PER | 1998 | 59.06 | 56.20 | 61.69 |
| Peru             | PER | 1999 | 60.47 | 57.63 | 63.02 |
| Peru             | PER | 2000 | 61.28 | 58.36 | 64.03 |
| Peru             | PER | 2001 | 63.00 | 60.15 | 65.74 |
| Peru             | PER | 2002 | 64.84 | 62.12 | 67.57 |
| Peru             | PER | 2003 | 65.80 | 63.06 | 68.39 |
| Peru             | PER | 2004 | 67.16 | 64.42 | 69.84 |
| Peru             | PER | 2005 | 68.35 | 65.59 | 71.07 |
| Peru             | PER | 2006 | 69.43 | 66.50 | 72.12 |
| Peru             | PER | 2007 | 70.23 | 67.28 | 72.95 |
| Peru             | PER | 2008 | 70.38 | 67.26 | 73.26 |
| Peru             | PER | 2009 | 69.96 | 66.53 | 72.89 |
| Peru             | PER | 2010 | 70.37 | 66.46 | 73.53 |
| Peru             | PER | 2011 | 71.09 | 66.80 | 74.45 |
| Peru             | PER | 2012 | 71.81 | 67.27 | 75.33 |
| Peru             | PER | 2013 | 71.95 | 66.78 | 75.61 |
| Peru             | PER | 2014 | 72.00 | 65.85 | 76.21 |
| Peru             | PER | 2015 | 71.87 | 64.80 | 76.46 |
| Peru             | PER | 2016 | 71.49 | 62.51 | 76.65 |
| Peru             | PER | 2017 | 71.32 | 60.17 | 76.85 |
| Philippines      | PHL | 1990 | 52.71 | 49.69 | 55.14 |
| Philippines      | PHL | 1991 | 53.39 | 50.54 | 55.69 |
| Philippines      | PHL | 1992 | 53.03 | 50.54 | 55.22 |
| Philippines      | PHL | 1993 | 53.55 | 51.28 | 55.68 |
| Philippines      | PHL | 1994 | 53.62 | 51.62 | 55.64 |
| Philippines      | PHL | 1995 | 53.75 | 51.86 | 55.60 |
| Philippines      | PHL | 1996 | 54.16 | 52.30 | 55.84 |
| Philippines      | PHL | 1997 | 54.23 | 52.39 | 56.00 |
| Philippines      | PHL | 1998 | 54.49 | 52.79 | 56.23 |
| Philippines      | PHL | 1999 | 54.84 | 53.14 | 56.52 |
| Philippines      | PHL | 2000 | 54.54 | 52.93 | 56.18 |
| Philippines      | PHL | 2001 | 54.22 | 52.56 | 55.85 |
| Philippines      | PHL | 2002 | 53.93 | 52.21 | 55.63 |
| Philippines      | PHL | 2003 | 53.94 | 51.97 | 55.71 |
| Philippines      | PHL | 2004 | 53.64 | 51.70 | 55.50 |
| Philippines      | PHL | 2005 | 53.64 | 51.63 | 55.57 |
| Philippines      | PHL | 2006 | 53.38 | 51.29 | 55.46 |
| Philippines      | PHL | 2007 | 53.26 | 50.96 | 55.41 |
| Philippines      | PHL | 2008 | 52.88 | 50.48 | 55.01 |
| Philippines      | PHL | 2009 | 52.51 | 50.04 | 54.83 |
| Philippines      | PHL | 2010 | 52.51 | 49.86 | 54.90 |
| Philippines      | PHL | 2011 | 52.62 | 49.61 | 55.05 |
| Philippines      | PHL | 2012 | 52.62 | 49.42 | 55.19 |
| Philippines      | PHL | 2013 | 52.66 | 49.36 | 55.30 |
| Philippines      | PHL | 2014 | 52.76 | 49.41 | 55.53 |
| Philippines      | PHL | 2015 | 52.53 | 48.67 | 55.42 |
| Philippines      | PHL | 2016 | 53.08 | 48.62 | 56.50 |
| Philippines      | PHL | 2017 | 53.74 | 48.85 | 57.88 |
| Papua New Guinea | PNG | 1990 | 9.14  | 6.77  | 10.83 |
| Papua New Guinea | PNG | 1991 | 9.40  | 7.00  | 11.13 |
| Papua New Guinea | PNG | 1992 | 9.59  | 7.11  | 11.34 |
| Papua New Guinea | PNG | 1993 | 9.75  | 7.40  | 11.49 |
| Papua New Guinea | PNG | 1994 | 9.94  | 7.58  | 11.67 |
| Papua New Guinea | PNG | 1995 | 10.15 | 7.78  | 11.93 |
| Papua New Guinea | PNG | 1996 | 10.45 | 8.06  | 12.16 |
| Papua New Guinea | PNG | 1997 | 10.71 | 8.34  | 12.36 |
| Papua New Guinea | PNG | 1998 | 11.09 | 8.63  | 12.65 |
| Papua New Guinea | PNG | 1999 | 11.48 | 9.29  | 12.94 |
| Papua New Guinea | PNG | 2000 | 11.80 | 9.77  | 13.20 |
| Papua New Guinea | PNG | 2001 | 12.10 | 10.26 | 13.37 |

|                  |     |      |       |       |       |
|------------------|-----|------|-------|-------|-------|
| Papua New Guinea | PNG | 2002 | 12.54 | 10.82 | 13.74 |
| Papua New Guinea | PNG | 2003 | 12.89 | 11.26 | 14.12 |
| Papua New Guinea | PNG | 2004 | 13.44 | 11.83 | 14.66 |
| Papua New Guinea | PNG | 2005 | 13.85 | 12.23 | 15.04 |
| Papua New Guinea | PNG | 2006 | 14.21 | 12.67 | 15.40 |
| Papua New Guinea | PNG | 2007 | 14.51 | 12.92 | 15.67 |
| Papua New Guinea | PNG | 2008 | 14.75 | 13.24 | 15.94 |
| Papua New Guinea | PNG | 2009 | 15.08 | 13.59 | 16.29 |
| Papua New Guinea | PNG | 2010 | 15.38 | 13.90 | 16.59 |
| Papua New Guinea | PNG | 2011 | 15.67 | 14.13 | 16.95 |
| Papua New Guinea | PNG | 2012 | 16.00 | 14.50 | 17.23 |
| Papua New Guinea | PNG | 2013 | 16.39 | 14.90 | 17.60 |
| Papua New Guinea | PNG | 2014 | 16.69 | 15.19 | 17.95 |
| Papua New Guinea | PNG | 2015 | 17.02 | 15.50 | 18.29 |
| Papua New Guinea | PNG | 2016 | 17.36 | 15.82 | 18.62 |
| Papua New Guinea | PNG | 2017 | 17.68 | 16.17 | 18.94 |
| Poland           | POL | 1990 | 59.10 | 56.85 | 61.16 |
| Poland           | POL | 1991 | 58.28 | 56.04 | 60.35 |
| Poland           | POL | 1992 | 59.74 | 57.51 | 61.84 |
| Poland           | POL | 1993 | 61.78 | 59.48 | 63.85 |
| Poland           | POL | 1994 | 62.49 | 60.23 | 64.62 |
| Poland           | POL | 1995 | 62.81 | 60.45 | 64.97 |
| Poland           | POL | 1996 | 64.65 | 62.20 | 66.77 |
| Poland           | POL | 1997 | 65.29 | 62.69 | 67.43 |
| Poland           | POL | 1998 | 66.23 | 63.58 | 68.40 |
| Poland           | POL | 1999 | 66.46 | 63.66 | 68.71 |
| Poland           | POL | 2000 | 68.06 | 65.04 | 70.42 |
| Poland           | POL | 2001 | 69.23 | 66.09 | 71.66 |
| Poland           | POL | 2002 | 70.16 | 66.66 | 72.65 |
| Poland           | POL | 2003 | 70.77 | 67.03 | 73.38 |
| Poland           | POL | 2004 | 70.91 | 66.87 | 73.66 |
| Poland           | POL | 2005 | 71.23 | 66.94 | 74.09 |
| Poland           | POL | 2006 | 71.45 | 67.00 | 74.50 |
| Poland           | POL | 2007 | 71.85 | 67.37 | 74.83 |
| Poland           | POL | 2008 | 72.56 | 68.03 | 75.58 |
| Poland           | POL | 2009 | 73.12 | 68.42 | 76.21 |
| Poland           | POL | 2010 | 73.98 | 68.85 | 77.18 |
| Poland           | POL | 2011 | 74.37 | 68.95 | 77.65 |
| Poland           | POL | 2012 | 74.82 | 69.62 | 78.01 |
| Poland           | POL | 2013 | 75.90 | 71.23 | 78.95 |
| Poland           | POL | 2014 | 76.56 | 71.68 | 79.73 |
| Poland           | POL | 2015 | 76.39 | 71.37 | 79.67 |
| Poland           | POL | 2016 | 76.71 | 71.48 | 80.07 |
| Poland           | POL | 2017 | 77.04 | 71.81 | 80.59 |
| Puerto Rico      | PRI | 1990 | 65.55 | 56.76 | 70.45 |
| Puerto Rico      | PRI | 1991 | 64.49 | 48.67 | 70.42 |
| Puerto Rico      | PRI | 1992 | 62.98 | 48.12 | 70.06 |
| Puerto Rico      | PRI | 1993 | 61.34 | 48.00 | 69.74 |
| Puerto Rico      | PRI | 1994 | 60.08 | 48.40 | 69.77 |
| Puerto Rico      | PRI | 1995 | 58.70 | 48.27 | 69.19 |
| Puerto Rico      | PRI | 1996 | 57.86 | 48.78 | 69.32 |
| Puerto Rico      | PRI | 1997 | 57.51 | 49.61 | 69.84 |
| Puerto Rico      | PRI | 1998 | 56.24 | 49.44 | 69.18 |
| Puerto Rico      | PRI | 1999 | 56.67 | 50.34 | 70.10 |
| Puerto Rico      | PRI | 2000 | 56.60 | 50.93 | 70.63 |
| Puerto Rico      | PRI | 2001 | 55.30 | 51.38 | 69.60 |
| Puerto Rico      | PRI | 2002 | 55.46 | 52.41 | 69.44 |
| Puerto Rico      | PRI | 2003 | 55.34 | 52.83 | 68.59 |
| Puerto Rico      | PRI | 2004 | 55.39 | 53.06 | 68.50 |
| Puerto Rico      | PRI | 2005 | 55.61 | 53.31 | 68.43 |
| Puerto Rico      | PRI | 2006 | 56.16 | 53.90 | 68.90 |
| Puerto Rico      | PRI | 2007 | 56.32 | 54.19 | 68.27 |

|                          |     |      |       |       |       |
|--------------------------|-----|------|-------|-------|-------|
| Puerto Rico              | PRI | 2008 | 56.80 | 54.56 | 69.32 |
| Puerto Rico              | PRI | 2009 | 57.29 | 54.80 | 70.13 |
| Puerto Rico              | PRI | 2010 | 58.43 | 55.60 | 72.05 |
| Puerto Rico              | PRI | 2011 | 58.45 | 55.58 | 72.23 |
| Puerto Rico              | PRI | 2012 | 59.44 | 56.49 | 73.60 |
| Puerto Rico              | PRI | 2013 | 59.15 | 56.76 | 72.68 |
| Puerto Rico              | PRI | 2014 | 59.20 | 57.35 | 70.89 |
| Puerto Rico              | PRI | 2015 | 59.53 | 57.84 | 69.77 |
| Puerto Rico              | PRI | 2016 | 59.19 | 57.56 | 69.00 |
| Puerto Rico              | PRI | 2017 | 59.01 | 57.21 | 69.11 |
| atic People's Republic o | PRK | 1990 | 43.84 | 39.34 | 48.75 |
| atic People's Republic o | PRK | 1991 | 44.46 | 40.08 | 49.50 |
| atic People's Republic o | PRK | 1992 | 44.99 | 40.81 | 49.81 |
| atic People's Republic o | PRK | 1993 | 45.48 | 41.38 | 49.88 |
| atic People's Republic o | PRK | 1994 | 45.82 | 41.89 | 49.97 |
| atic People's Republic o | PRK | 1995 | 45.97 | 42.20 | 50.05 |
| atic People's Republic o | PRK | 1996 | 46.04 | 42.29 | 50.13 |
| atic People's Republic o | PRK | 1997 | 46.02 | 42.15 | 50.11 |
| atic People's Republic o | PRK | 1998 | 45.94 | 41.91 | 50.10 |
| atic People's Republic o | PRK | 1999 | 46.25 | 42.16 | 50.28 |
| atic People's Republic o | PRK | 2000 | 46.38 | 42.18 | 50.52 |
| atic People's Republic o | PRK | 2001 | 46.50 | 42.14 | 50.51 |
| atic People's Republic o | PRK | 2002 | 47.35 | 42.85 | 51.49 |
| atic People's Republic o | PRK | 2003 | 47.88 | 43.40 | 51.99 |
| atic People's Republic o | PRK | 2004 | 48.48 | 43.93 | 52.57 |
| atic People's Republic o | PRK | 2005 | 49.13 | 44.69 | 53.13 |
| atic People's Republic o | PRK | 2006 | 49.76 | 45.48 | 53.84 |
| atic People's Republic o | PRK | 2007 | 50.40 | 46.30 | 54.31 |
| atic People's Republic o | PRK | 2008 | 51.51 | 47.48 | 55.36 |
| atic People's Republic o | PRK | 2009 | 52.12 | 48.29 | 55.94 |
| atic People's Republic o | PRK | 2010 | 52.68 | 48.88 | 56.51 |
| atic People's Republic o | PRK | 2011 | 53.24 | 49.27 | 56.98 |
| atic People's Republic o | PRK | 2012 | 53.91 | 50.03 | 57.70 |
| atic People's Republic o | PRK | 2013 | 54.37 | 50.48 | 58.29 |
| atic People's Republic o | PRK | 2014 | 54.94 | 51.00 | 58.90 |
| atic People's Republic o | PRK | 2015 | 55.49 | 51.35 | 59.53 |
| atic People's Republic o | PRK | 2016 | 56.20 | 52.01 | 60.42 |
| atic People's Republic o | PRK | 2017 | 56.92 | 52.79 | 61.01 |
| Portugal                 | PRT | 1990 | 66.74 | 65.33 | 68.03 |
| Portugal                 | PRT | 1991 | 66.88 | 65.32 | 68.16 |
| Portugal                 | PRT | 1992 | 67.63 | 65.99 | 68.95 |
| Portugal                 | PRT | 1993 | 67.82 | 66.02 | 69.18 |
| Portugal                 | PRT | 1994 | 69.36 | 67.32 | 70.79 |
| Portugal                 | PRT | 1995 | 69.45 | 67.33 | 70.93 |
| Portugal                 | PRT | 1996 | 69.93 | 67.61 | 71.57 |
| Portugal                 | PRT | 1997 | 70.46 | 67.94 | 72.18 |
| Portugal                 | PRT | 1998 | 71.00 | 68.24 | 72.85 |
| Portugal                 | PRT | 1999 | 71.55 | 68.73 | 73.55 |
| Portugal                 | PRT | 2000 | 72.13 | 69.12 | 74.20 |
| Portugal                 | PRT | 2001 | 72.43 | 69.04 | 74.67 |
| Portugal                 | PRT | 2002 | 72.76 | 68.87 | 75.14 |
| Portugal                 | PRT | 2003 | 73.27 | 69.17 | 75.82 |
| Portugal                 | PRT | 2004 | 74.34 | 69.98 | 77.04 |
| Portugal                 | PRT | 2005 | 75.12 | 70.67 | 77.90 |
| Portugal                 | PRT | 2006 | 75.74 | 71.01 | 78.62 |
| Portugal                 | PRT | 2007 | 76.46 | 71.68 | 79.36 |
| Portugal                 | PRT | 2008 | 77.26 | 72.47 | 80.17 |
| Portugal                 | PRT | 2009 | 77.72 | 72.79 | 80.73 |
| Portugal                 | PRT | 2010 | 78.53 | 73.15 | 81.63 |
| Portugal                 | PRT | 2011 | 79.34 | 73.93 | 82.51 |
| Portugal                 | PRT | 2012 | 80.28 | 74.91 | 83.50 |
| Portugal                 | PRT | 2013 | 81.04 | 75.66 | 84.45 |

|           |     |      |       |       |       |
|-----------|-----|------|-------|-------|-------|
| Portugal  | PRT | 2014 | 81.70 | 76.07 | 85.20 |
| Portugal  | PRT | 2015 | 82.69 | 77.00 | 86.18 |
| Portugal  | PRT | 2016 | 82.78 | 76.89 | 86.34 |
| Portugal  | PRT | 2017 | 82.90 | 76.96 | 86.65 |
| Paraguay  | PRY | 1990 | 53.41 | 50.30 | 56.07 |
| Paraguay  | PRY | 1991 | 54.18 | 51.13 | 56.61 |
| Paraguay  | PRY | 1992 | 54.15 | 51.13 | 56.87 |
| Paraguay  | PRY | 1993 | 53.70 | 50.81 | 56.31 |
| Paraguay  | PRY | 1994 | 54.33 | 51.76 | 56.77 |
| Paraguay  | PRY | 1995 | 55.19 | 52.67 | 57.53 |
| Paraguay  | PRY | 1996 | 55.72 | 53.27 | 57.92 |
| Paraguay  | PRY | 1997 | 56.75 | 54.28 | 58.98 |
| Paraguay  | PRY | 1998 | 57.25 | 54.92 | 59.50 |
| Paraguay  | PRY | 1999 | 57.39 | 54.98 | 59.54 |
| Paraguay  | PRY | 2000 | 58.02 | 55.74 | 60.05 |
| Paraguay  | PRY | 2001 | 59.09 | 56.97 | 61.10 |
| Paraguay  | PRY | 2002 | 59.59 | 57.38 | 61.76 |
| Paraguay  | PRY | 2003 | 59.51 | 57.38 | 61.61 |
| Paraguay  | PRY | 2004 | 59.38 | 56.98 | 61.48 |
| Paraguay  | PRY | 2005 | 60.36 | 57.98 | 62.51 |
| Paraguay  | PRY | 2006 | 60.45 | 57.99 | 62.62 |
| Paraguay  | PRY | 2007 | 61.35 | 58.72 | 63.71 |
| Paraguay  | PRY | 2008 | 61.72 | 59.14 | 64.16 |
| Paraguay  | PRY | 2009 | 61.56 | 58.88 | 64.01 |
| Paraguay  | PRY | 2010 | 61.92 | 59.23 | 64.47 |
| Paraguay  | PRY | 2011 | 62.45 | 59.22 | 65.06 |
| Paraguay  | PRY | 2012 | 63.15 | 59.84 | 65.90 |
| Paraguay  | PRY | 2013 | 63.33 | 59.90 | 66.18 |
| Paraguay  | PRY | 2014 | 64.19 | 60.46 | 67.29 |
| Paraguay  | PRY | 2015 | 64.93 | 60.74 | 68.33 |
| Paraguay  | PRY | 2016 | 65.36 | 60.94 | 69.19 |
| Paraguay  | PRY | 2017 | 65.75 | 61.15 | 70.05 |
| Palestine | PSE | 1990 | 46.60 | 42.68 | 50.45 |
| Palestine | PSE | 1991 | 47.08 | 43.30 | 50.73 |
| Palestine | PSE | 1992 | 47.53 | 43.76 | 50.99 |
| Palestine | PSE | 1993 | 48.19 | 44.54 | 51.53 |
| Palestine | PSE | 1994 | 48.82 | 45.18 | 52.01 |
| Palestine | PSE | 1995 | 49.37 | 45.92 | 52.48 |
| Palestine | PSE | 1996 | 49.93 | 46.66 | 52.91 |
| Palestine | PSE | 1997 | 50.56 | 47.35 | 53.37 |
| Palestine | PSE | 1998 | 51.29 | 48.44 | 53.95 |
| Palestine | PSE | 1999 | 52.15 | 49.49 | 54.71 |
| Palestine | PSE | 2000 | 52.58 | 50.14 | 55.01 |
| Palestine | PSE | 2001 | 53.17 | 50.85 | 55.44 |
| Palestine | PSE | 2002 | 53.45 | 51.09 | 55.64 |
| Palestine | PSE | 2003 | 54.05 | 51.69 | 56.31 |
| Palestine | PSE | 2004 | 54.24 | 51.93 | 56.40 |
| Palestine | PSE | 2005 | 55.27 | 53.00 | 57.43 |
| Palestine | PSE | 2006 | 56.20 | 53.96 | 58.37 |
| Palestine | PSE | 2007 | 57.40 | 55.14 | 59.53 |
| Palestine | PSE | 2008 | 58.56 | 56.38 | 60.72 |
| Palestine | PSE | 2009 | 59.77 | 57.59 | 61.98 |
| Palestine | PSE | 2010 | 61.22 | 58.87 | 63.41 |
| Palestine | PSE | 2011 | 62.46 | 60.15 | 64.68 |
| Palestine | PSE | 2012 | 63.68 | 61.23 | 65.89 |
| Palestine | PSE | 2013 | 64.96 | 62.41 | 67.21 |
| Palestine | PSE | 2014 | 65.86 | 63.26 | 68.24 |
| Palestine | PSE | 2015 | 66.92 | 64.29 | 69.45 |
| Palestine | PSE | 2016 | 67.71 | 64.95 | 70.33 |
| Palestine | PSE | 2017 | 68.46 | 65.64 | 71.30 |
| Qatar     | QAT | 1990 | 42.33 | 36.06 | 52.63 |
| Qatar     | QAT | 1991 | 41.87 | 36.33 | 52.57 |

|                    |     |      |       |       |       |
|--------------------|-----|------|-------|-------|-------|
| Qatar              | QAT | 1992 | 42.56 | 36.66 | 53.21 |
| Qatar              | QAT | 1993 | 44.38 | 37.19 | 54.35 |
| Qatar              | QAT | 1994 | 45.14 | 37.59 | 55.02 |
| Qatar              | QAT | 1995 | 45.74 | 38.10 | 55.69 |
| Qatar              | QAT | 1996 | 47.29 | 38.81 | 56.89 |
| Qatar              | QAT | 1997 | 48.83 | 39.84 | 58.34 |
| Qatar              | QAT | 1998 | 49.55 | 40.84 | 59.56 |
| Qatar              | QAT | 1999 | 48.77 | 41.71 | 60.06 |
| Qatar              | QAT | 2000 | 48.74 | 43.14 | 61.25 |
| Qatar              | QAT | 2001 | 50.32 | 44.63 | 63.14 |
| Qatar              | QAT | 2002 | 51.49 | 45.90 | 64.69 |
| Qatar              | QAT | 2003 | 52.09 | 46.97 | 65.53 |
| Qatar              | QAT | 2004 | 52.07 | 47.87 | 65.97 |
| Qatar              | QAT | 2005 | 51.70 | 48.24 | 65.29 |
| Qatar              | QAT | 2006 | 51.79 | 48.79 | 65.09 |
| Qatar              | QAT | 2007 | 52.49 | 49.34 | 66.14 |
| Qatar              | QAT | 2008 | 52.68 | 49.60 | 66.22 |
| Qatar              | QAT | 2009 | 53.56 | 50.29 | 67.43 |
| Qatar              | QAT | 2010 | 54.47 | 50.97 | 68.73 |
| Qatar              | QAT | 2011 | 55.30 | 51.56 | 70.13 |
| Qatar              | QAT | 2012 | 56.01 | 52.15 | 71.40 |
| Qatar              | QAT | 2013 | 56.09 | 52.64 | 71.60 |
| Qatar              | QAT | 2014 | 56.17 | 53.05 | 71.35 |
| Qatar              | QAT | 2015 | 56.45 | 53.58 | 71.02 |
| Qatar              | QAT | 2016 | 56.61 | 53.99 | 70.41 |
| Qatar              | QAT | 2017 | 56.80 | 54.27 | 69.60 |
| Romania            | ROU | 1990 | 59.54 | 57.09 | 61.56 |
| Romania            | ROU | 1991 | 59.88 | 57.36 | 61.93 |
| Romania            | ROU | 1992 | 58.67 | 56.14 | 60.77 |
| Romania            | ROU | 1993 | 58.39 | 55.74 | 60.46 |
| Romania            | ROU | 1994 | 58.12 | 55.41 | 60.24 |
| Romania            | ROU | 1995 | 57.54 | 54.84 | 59.75 |
| Romania            | ROU | 1996 | 56.79 | 53.85 | 59.09 |
| Romania            | ROU | 1997 | 56.98 | 53.90 | 59.30 |
| Romania            | ROU | 1998 | 58.68 | 55.23 | 61.15 |
| Romania            | ROU | 1999 | 60.13 | 56.20 | 62.83 |
| Romania            | ROU | 2000 | 60.74 | 56.31 | 63.67 |
| Romania            | ROU | 2001 | 61.28 | 57.05 | 64.04 |
| Romania            | ROU | 2002 | 61.37 | 57.17 | 64.24 |
| Romania            | ROU | 2003 | 61.96 | 57.62 | 64.83 |
| Romania            | ROU | 2004 | 63.18 | 58.58 | 66.31 |
| Romania            | ROU | 2005 | 63.73 | 58.66 | 66.97 |
| Romania            | ROU | 2006 | 64.77 | 59.46 | 68.09 |
| Romania            | ROU | 2007 | 65.91 | 60.87 | 69.15 |
| Romania            | ROU | 2008 | 66.19 | 61.26 | 69.44 |
| Romania            | ROU | 2009 | 66.53 | 61.65 | 69.72 |
| Romania            | ROU | 2010 | 67.29 | 62.17 | 70.49 |
| Romania            | ROU | 2011 | 68.51 | 62.47 | 72.07 |
| Romania            | ROU | 2012 | 68.33 | 61.23 | 72.17 |
| Romania            | ROU | 2013 | 68.44 | 60.46 | 72.57 |
| Romania            | ROU | 2014 | 68.21 | 59.64 | 72.45 |
| Romania            | ROU | 2015 | 68.49 | 59.55 | 72.89 |
| Romania            | ROU | 2016 | 68.26 | 58.30 | 72.88 |
| Romania            | ROU | 2017 | 68.11 | 57.41 | 73.07 |
| Russian Federation | RUS | 1990 | 57.59 | 54.15 | 60.23 |
| Russian Federation | RUS | 1991 | 57.19 | 53.63 | 59.88 |
| Russian Federation | RUS | 1992 | 54.23 | 50.27 | 57.08 |
| Russian Federation | RUS | 1993 | 44.95 | 40.86 | 48.32 |
| Russian Federation | RUS | 1994 | 34.64 | 28.33 | 41.38 |
| Russian Federation | RUS | 1995 | 43.22 | 38.69 | 47.18 |
| Russian Federation | RUS | 1996 | 50.20 | 47.02 | 52.97 |
| Russian Federation | RUS | 1997 | 54.88 | 51.96 | 57.34 |

|                    |     |      |       |       |       |
|--------------------|-----|------|-------|-------|-------|
| Russian Federation | RUS | 1998 | 56.50 | 53.62 | 58.89 |
| Russian Federation | RUS | 1999 | 53.02 | 49.95 | 55.63 |
| Russian Federation | RUS | 2000 | 50.36 | 47.05 | 53.30 |
| Russian Federation | RUS | 2001 | 49.46 | 45.95 | 52.49 |
| Russian Federation | RUS | 2002 | 47.62 | 43.60 | 51.13 |
| Russian Federation | RUS | 2003 | 46.00 | 41.14 | 50.04 |
| Russian Federation | RUS | 2004 | 48.05 | 43.78 | 51.73 |
| Russian Federation | RUS | 2005 | 43.53 | 36.70 | 48.68 |
| Russian Federation | RUS | 2006 | 53.15 | 49.66 | 56.28 |
| Russian Federation | RUS | 2007 | 57.30 | 53.94 | 60.08 |
| Russian Federation | RUS | 2008 | 57.76 | 54.38 | 60.61 |
| Russian Federation | RUS | 2009 | 60.70 | 57.23 | 63.45 |
| Russian Federation | RUS | 2010 | 61.04 | 57.22 | 63.89 |
| Russian Federation | RUS | 2011 | 64.64 | 60.81 | 67.46 |
| Russian Federation | RUS | 2012 | 66.31 | 62.02 | 69.19 |
| Russian Federation | RUS | 2013 | 67.40 | 62.64 | 70.39 |
| Russian Federation | RUS | 2014 | 67.39 | 62.40 | 70.55 |
| Russian Federation | RUS | 2015 | 68.55 | 63.16 | 71.76 |
| Russian Federation | RUS | 2016 | 69.77 | 64.18 | 73.11 |
| Russian Federation | RUS | 2017 | 70.36 | 64.42 | 73.82 |
| Rwanda             | RWA | 1990 | 12.98 | 10.40 | 17.00 |
| Rwanda             | RWA | 1991 | 13.47 | 10.59 | 17.80 |
| Rwanda             | RWA | 1992 | 13.78 | 10.79 | 18.05 |
| Rwanda             | RWA | 1993 | 13.14 | 11.06 | 17.20 |
| Rwanda             | RWA | 1994 | 11.98 | 10.36 | 13.38 |
| Rwanda             | RWA | 1995 | 11.74 | 10.06 | 13.24 |
| Rwanda             | RWA | 1996 | 12.13 | 10.36 | 15.00 |
| Rwanda             | RWA | 1997 | 12.46 | 10.82 | 15.27 |
| Rwanda             | RWA | 1998 | 13.15 | 11.53 | 16.59 |
| Rwanda             | RWA | 1999 | 14.72 | 12.36 | 19.17 |
| Rwanda             | RWA | 2000 | 16.02 | 13.17 | 20.46 |
| Rwanda             | RWA | 2001 | 19.14 | 14.33 | 23.18 |
| Rwanda             | RWA | 2002 | 22.63 | 18.48 | 25.82 |
| Rwanda             | RWA | 2003 | 25.41 | 22.04 | 28.31 |
| Rwanda             | RWA | 2004 | 29.37 | 26.87 | 31.80 |
| Rwanda             | RWA | 2005 | 31.72 | 29.27 | 34.04 |
| Rwanda             | RWA | 2006 | 33.90 | 31.41 | 36.28 |
| Rwanda             | RWA | 2007 | 35.91 | 33.57 | 38.27 |
| Rwanda             | RWA | 2008 | 37.74 | 35.42 | 40.11 |
| Rwanda             | RWA | 2009 | 39.28 | 36.93 | 41.63 |
| Rwanda             | RWA | 2010 | 40.70 | 38.23 | 43.03 |
| Rwanda             | RWA | 2011 | 41.93 | 39.42 | 44.34 |
| Rwanda             | RWA | 2012 | 42.92 | 40.33 | 45.45 |
| Rwanda             | RWA | 2013 | 43.79 | 41.09 | 46.40 |
| Rwanda             | RWA | 2014 | 44.89 | 42.04 | 47.61 |
| Rwanda             | RWA | 2015 | 45.43 | 42.48 | 48.42 |
| Rwanda             | RWA | 2016 | 46.13 | 43.05 | 49.21 |
| Rwanda             | RWA | 2017 | 46.77 | 43.52 | 50.03 |
| Saudi Arabia       | SAU | 1990 | 49.35 | 44.77 | 52.96 |
| Saudi Arabia       | SAU | 1991 | 50.49 | 45.62 | 54.16 |
| Saudi Arabia       | SAU | 1992 | 51.75 | 47.11 | 55.39 |
| Saudi Arabia       | SAU | 1993 | 53.23 | 48.87 | 56.79 |
| Saudi Arabia       | SAU | 1994 | 54.22 | 49.62 | 57.85 |
| Saudi Arabia       | SAU | 1995 | 55.14 | 50.35 | 58.81 |
| Saudi Arabia       | SAU | 1996 | 56.21 | 51.48 | 59.80 |
| Saudi Arabia       | SAU | 1997 | 57.27 | 52.45 | 60.77 |
| Saudi Arabia       | SAU | 1998 | 58.10 | 53.05 | 61.60 |
| Saudi Arabia       | SAU | 1999 | 58.64 | 52.85 | 62.35 |
| Saudi Arabia       | SAU | 2000 | 58.63 | 51.53 | 62.76 |
| Saudi Arabia       | SAU | 2001 | 59.25 | 52.35 | 63.50 |
| Saudi Arabia       | SAU | 2002 | 59.23 | 51.22 | 63.66 |
| Saudi Arabia       | SAU | 2003 | 59.03 | 48.20 | 63.77 |



|              |     |      |       |       |       |
|--------------|-----|------|-------|-------|-------|
| Saudi Arabia | SAU | 2004 | 58.37 | 43.87 | 63.83 |
| Saudi Arabia | SAU | 2005 | 57.80 | 43.41 | 63.88 |
| Saudi Arabia | SAU | 2006 | 56.99 | 43.47 | 63.91 |
| Saudi Arabia | SAU | 2007 | 56.69 | 43.66 | 64.16 |
| Saudi Arabia | SAU | 2008 | 55.66 | 43.82 | 64.15 |
| Saudi Arabia | SAU | 2009 | 55.32 | 44.16 | 64.46 |
| Saudi Arabia | SAU | 2010 | 55.03 | 44.50 | 64.92 |
| Saudi Arabia | SAU | 2011 | 54.53 | 45.03 | 65.14 |
| Saudi Arabia | SAU | 2012 | 54.13 | 45.74 | 65.74 |
| Saudi Arabia | SAU | 2013 | 53.01 | 46.22 | 65.65 |
| Saudi Arabia | SAU | 2014 | 52.14 | 46.94 | 65.67 |
| Saudi Arabia | SAU | 2015 | 51.87 | 47.83 | 65.72 |
| Saudi Arabia | SAU | 2016 | 51.90 | 48.52 | 65.65 |
| Saudi Arabia | SAU | 2017 | 52.22 | 49.09 | 65.51 |
| Sudan        | SDN | 1990 | 15.31 | 12.00 | 17.89 |
| Sudan        | SDN | 1991 | 16.06 | 12.72 | 18.64 |
| Sudan        | SDN | 1992 | 16.66 | 13.43 | 19.20 |
| Sudan        | SDN | 1993 | 17.29 | 14.06 | 19.76 |
| Sudan        | SDN | 1994 | 17.97 | 14.74 | 20.49 |
| Sudan        | SDN | 1995 | 18.53 | 15.22 | 21.13 |
| Sudan        | SDN | 1996 | 19.06 | 15.77 | 21.62 |
| Sudan        | SDN | 1997 | 19.55 | 16.23 | 22.06 |
| Sudan        | SDN | 1998 | 20.04 | 16.75 | 22.61 |
| Sudan        | SDN | 1999 | 20.61 | 17.30 | 23.24 |
| Sudan        | SDN | 2000 | 21.02 | 17.77 | 23.67 |
| Sudan        | SDN | 2001 | 21.58 | 18.24 | 24.24 |
| Sudan        | SDN | 2002 | 22.19 | 19.12 | 24.82 |
| Sudan        | SDN | 2003 | 22.93 | 20.00 | 25.55 |
| Sudan        | SDN | 2004 | 23.64 | 20.74 | 26.23 |
| Sudan        | SDN | 2005 | 24.53 | 21.67 | 27.00 |
| Sudan        | SDN | 2006 | 25.34 | 22.46 | 27.81 |
| Sudan        | SDN | 2007 | 26.22 | 23.41 | 28.77 |
| Sudan        | SDN | 2008 | 27.43 | 24.42 | 31.09 |
| Sudan        | SDN | 2009 | 29.23 | 25.41 | 35.40 |
| Sudan        | SDN | 2010 | 31.97 | 26.47 | 38.26 |
| Sudan        | SDN | 2011 | 35.05 | 28.06 | 40.94 |
| Sudan        | SDN | 2012 | 37.80 | 30.62 | 42.84 |
| Sudan        | SDN | 2013 | 40.03 | 34.05 | 44.71 |
| Sudan        | SDN | 2014 | 41.89 | 36.89 | 46.41 |
| Sudan        | SDN | 2015 | 43.67 | 38.93 | 48.14 |
| Sudan        | SDN | 2016 | 45.23 | 40.66 | 49.64 |
| Sudan        | SDN | 2017 | 46.64 | 42.14 | 51.05 |
| Senegal      | SEN | 1990 | 17.82 | 16.15 | 19.32 |
| Senegal      | SEN | 1991 | 17.99 | 16.46 | 19.48 |
| Senegal      | SEN | 1992 | 18.03 | 16.39 | 19.43 |
| Senegal      | SEN | 1993 | 18.27 | 16.72 | 19.57 |
| Senegal      | SEN | 1994 | 18.68 | 17.20 | 20.27 |
| Senegal      | SEN | 1995 | 19.72 | 17.89 | 21.68 |
| Senegal      | SEN | 1996 | 21.30 | 19.33 | 23.19 |
| Senegal      | SEN | 1997 | 22.60 | 20.80 | 24.46 |
| Senegal      | SEN | 1998 | 23.94 | 22.26 | 25.72 |
| Senegal      | SEN | 1999 | 25.23 | 23.56 | 26.96 |
| Senegal      | SEN | 2000 | 26.30 | 24.74 | 27.97 |
| Senegal      | SEN | 2001 | 27.92 | 26.35 | 29.56 |
| Senegal      | SEN | 2002 | 29.09 | 27.59 | 30.75 |
| Senegal      | SEN | 2003 | 30.05 | 28.53 | 31.73 |
| Senegal      | SEN | 2004 | 31.05 | 29.52 | 32.79 |
| Senegal      | SEN | 2005 | 31.91 | 30.32 | 33.69 |
| Senegal      | SEN | 2006 | 32.69 | 30.96 | 34.40 |
| Senegal      | SEN | 2007 | 33.63 | 31.78 | 35.43 |
| Senegal      | SEN | 2008 | 34.40 | 32.39 | 36.29 |
| Senegal      | SEN | 2009 | 35.04 | 33.02 | 36.94 |

|                 |     |      |       |       |       |
|-----------------|-----|------|-------|-------|-------|
| Senegal         | SEN | 2010 | 35.62 | 33.43 | 37.57 |
| Senegal         | SEN | 2011 | 36.18 | 33.87 | 38.25 |
| Senegal         | SEN | 2012 | 36.78 | 34.41 | 38.92 |
| Senegal         | SEN | 2013 | 37.33 | 34.87 | 39.64 |
| Senegal         | SEN | 2014 | 38.22 | 35.58 | 40.68 |
| Senegal         | SEN | 2015 | 39.02 | 36.20 | 41.52 |
| Senegal         | SEN | 2016 | 39.93 | 37.11 | 42.58 |
| Senegal         | SEN | 2017 | 40.67 | 37.83 | 43.36 |
| Singapore       | SGP | 1990 | 66.09 | 64.24 | 67.77 |
| Singapore       | SGP | 1991 | 67.38 | 65.54 | 68.98 |
| Singapore       | SGP | 1992 | 68.57 | 66.75 | 70.15 |
| Singapore       | SGP | 1993 | 69.62 | 67.78 | 71.19 |
| Singapore       | SGP | 1994 | 70.37 | 68.50 | 72.06 |
| Singapore       | SGP | 1995 | 71.14 | 69.36 | 72.81 |
| Singapore       | SGP | 1996 | 72.31 | 70.47 | 73.92 |
| Singapore       | SGP | 1997 | 74.16 | 72.29 | 75.88 |
| Singapore       | SGP | 1998 | 75.15 | 73.00 | 77.07 |
| Singapore       | SGP | 1999 | 76.20 | 73.83 | 78.38 |
| Singapore       | SGP | 2000 | 77.23 | 74.83 | 79.35 |
| Singapore       | SGP | 2001 | 78.14 | 76.01 | 80.03 |
| Singapore       | SGP | 2002 | 79.24 | 77.05 | 81.16 |
| Singapore       | SGP | 2003 | 80.75 | 78.35 | 82.82 |
| Singapore       | SGP | 2004 | 81.54 | 79.07 | 83.61 |
| Singapore       | SGP | 2005 | 82.21 | 79.62 | 84.43 |
| Singapore       | SGP | 2006 | 83.21 | 80.39 | 85.59 |
| Singapore       | SGP | 2007 | 84.20 | 81.13 | 86.58 |
| Singapore       | SGP | 2008 | 84.90 | 81.61 | 87.50 |
| Singapore       | SGP | 2009 | 86.40 | 83.03 | 89.00 |
| Singapore       | SGP | 2010 | 86.91 | 83.34 | 89.61 |
| Singapore       | SGP | 2011 | 87.25 | 83.58 | 89.98 |
| Singapore       | SGP | 2012 | 87.59 | 83.81 | 90.37 |
| Singapore       | SGP | 2013 | 87.98 | 83.95 | 90.80 |
| Singapore       | SGP | 2014 | 88.27 | 84.07 | 91.12 |
| Singapore       | SGP | 2015 | 88.50 | 84.25 | 91.41 |
| Singapore       | SGP | 2016 | 88.86 | 84.58 | 91.74 |
| Singapore       | SGP | 2017 | 89.15 | 84.94 | 92.03 |
| Solomon Islands | SLB | 1990 | 14.52 | 7.72  | 21.89 |
| Solomon Islands | SLB | 1991 | 15.01 | 7.85  | 22.36 |
| Solomon Islands | SLB | 1992 | 15.76 | 7.98  | 23.13 |
| Solomon Islands | SLB | 1993 | 16.53 | 8.11  | 23.80 |
| Solomon Islands | SLB | 1994 | 17.46 | 8.31  | 24.71 |
| Solomon Islands | SLB | 1995 | 18.54 | 9.07  | 25.71 |
| Solomon Islands | SLB | 1996 | 19.52 | 9.91  | 26.44 |
| Solomon Islands | SLB | 1997 | 20.25 | 11.05 | 26.99 |
| Solomon Islands | SLB | 1998 | 21.05 | 11.78 | 27.75 |
| Solomon Islands | SLB | 1999 | 21.89 | 12.18 | 28.55 |
| Solomon Islands | SLB | 2000 | 22.32 | 12.66 | 28.82 |
| Solomon Islands | SLB | 2001 | 22.56 | 12.67 | 28.93 |
| Solomon Islands | SLB | 2002 | 22.65 | 12.83 | 29.01 |
| Solomon Islands | SLB | 2003 | 22.96 | 13.07 | 29.25 |
| Solomon Islands | SLB | 2004 | 23.33 | 13.69 | 29.70 |
| Solomon Islands | SLB | 2005 | 23.88 | 14.03 | 30.12 |
| Solomon Islands | SLB | 2006 | 24.52 | 14.39 | 30.69 |
| Solomon Islands | SLB | 2007 | 25.32 | 15.18 | 31.37 |
| Solomon Islands | SLB | 2008 | 26.21 | 15.61 | 32.18 |
| Solomon Islands | SLB | 2009 | 26.97 | 16.27 | 32.79 |
| Solomon Islands | SLB | 2010 | 28.01 | 17.05 | 33.67 |
| Solomon Islands | SLB | 2011 | 29.08 | 18.92 | 34.48 |
| Solomon Islands | SLB | 2012 | 29.91 | 22.22 | 35.02 |
| Solomon Islands | SLB | 2013 | 30.88 | 24.21 | 35.94 |
| Solomon Islands | SLB | 2014 | 31.35 | 24.48 | 36.39 |
| Solomon Islands | SLB | 2015 | 32.39 | 25.58 | 37.60 |

|                 |     |      |       |       |       |
|-----------------|-----|------|-------|-------|-------|
| Solomon Islands | SLB | 2016 | 33.08 | 26.38 | 38.42 |
| Solomon Islands | SLB | 2017 | 33.78 | 27.03 | 39.15 |
| Sierra Leone    | SLE | 1990 | 17.15 | 14.26 | 20.07 |
| Sierra Leone    | SLE | 1991 | 17.19 | 14.08 | 20.23 |
| Sierra Leone    | SLE | 1992 | 18.23 | 15.30 | 21.07 |
| Sierra Leone    | SLE | 1993 | 19.08 | 16.18 | 21.76 |
| Sierra Leone    | SLE | 1994 | 19.25 | 16.24 | 21.98 |
| Sierra Leone    | SLE | 1995 | 19.68 | 16.77 | 22.32 |
| Sierra Leone    | SLE | 1996 | 21.05 | 18.27 | 23.56 |
| Sierra Leone    | SLE | 1997 | 21.14 | 18.32 | 23.79 |
| Sierra Leone    | SLE | 1998 | 20.87 | 18.01 | 23.55 |
| Sierra Leone    | SLE | 1999 | 21.30 | 18.33 | 24.09 |
| Sierra Leone    | SLE | 2000 | 22.39 | 19.54 | 25.11 |
| Sierra Leone    | SLE | 2001 | 23.60 | 20.61 | 26.27 |
| Sierra Leone    | SLE | 2002 | 24.46 | 21.51 | 27.34 |
| Sierra Leone    | SLE | 2003 | 25.36 | 22.49 | 28.19 |
| Sierra Leone    | SLE | 2004 | 26.34 | 23.48 | 29.07 |
| Sierra Leone    | SLE | 2005 | 27.81 | 25.10 | 30.62 |
| Sierra Leone    | SLE | 2006 | 28.62 | 26.03 | 31.25 |
| Sierra Leone    | SLE | 2007 | 29.37 | 26.93 | 31.87 |
| Sierra Leone    | SLE | 2008 | 30.25 | 27.76 | 32.80 |
| Sierra Leone    | SLE | 2009 | 30.90 | 28.24 | 33.41 |
| Sierra Leone    | SLE | 2010 | 31.55 | 28.91 | 34.07 |
| Sierra Leone    | SLE | 2011 | 32.53 | 29.71 | 35.05 |
| Sierra Leone    | SLE | 2012 | 33.29 | 30.50 | 35.98 |
| Sierra Leone    | SLE | 2013 | 34.41 | 31.50 | 37.09 |
| Sierra Leone    | SLE | 2014 | 35.33 | 32.37 | 38.05 |
| Sierra Leone    | SLE | 2015 | 36.05 | 32.95 | 38.92 |
| Sierra Leone    | SLE | 2016 | 36.91 | 33.74 | 39.79 |
| Sierra Leone    | SLE | 2017 | 37.89 | 34.68 | 40.88 |
| El Salvador     | SLV | 1990 | 37.11 | 21.85 | 46.11 |
| El Salvador     | SLV | 1991 | 38.48 | 21.92 | 46.49 |
| El Salvador     | SLV | 1992 | 39.75 | 21.99 | 46.70 |
| El Salvador     | SLV | 1993 | 42.23 | 22.66 | 48.19 |
| El Salvador     | SLV | 1994 | 43.81 | 22.91 | 48.80 |
| El Salvador     | SLV | 1995 | 46.86 | 24.05 | 51.00 |
| El Salvador     | SLV | 1996 | 48.41 | 42.16 | 51.96 |
| El Salvador     | SLV | 1997 | 49.98 | 45.47 | 53.16 |
| El Salvador     | SLV | 1998 | 51.37 | 47.36 | 54.22 |
| El Salvador     | SLV | 1999 | 52.65 | 49.34 | 55.21 |
| El Salvador     | SLV | 2000 | 54.28 | 51.09 | 56.72 |
| El Salvador     | SLV | 2001 | 55.98 | 53.13 | 58.38 |
| El Salvador     | SLV | 2002 | 56.90 | 54.12 | 59.11 |
| El Salvador     | SLV | 2003 | 57.63 | 55.10 | 59.78 |
| El Salvador     | SLV | 2004 | 58.08 | 55.72 | 60.05 |
| El Salvador     | SLV | 2005 | 58.68 | 56.55 | 60.71 |
| El Salvador     | SLV | 2006 | 59.87 | 57.89 | 61.82 |
| El Salvador     | SLV | 2007 | 60.01 | 57.97 | 61.95 |
| El Salvador     | SLV | 2008 | 61.27 | 59.30 | 63.30 |
| El Salvador     | SLV | 2009 | 61.59 | 59.65 | 63.53 |
| El Salvador     | SLV | 2010 | 62.66 | 60.72 | 64.64 |
| El Salvador     | SLV | 2011 | 63.19 | 61.26 | 65.17 |
| El Salvador     | SLV | 2012 | 64.25 | 62.20 | 66.25 |
| El Salvador     | SLV | 2013 | 64.50 | 62.41 | 66.59 |
| El Salvador     | SLV | 2014 | 64.38 | 62.07 | 66.66 |
| El Salvador     | SLV | 2015 | 64.86 | 62.32 | 67.24 |
| El Salvador     | SLV | 2016 | 65.44 | 62.35 | 68.16 |
| El Salvador     | SLV | 2017 | 65.96 | 62.53 | 69.23 |
| Somalia         | SOM | 1990 | 4.35  | 2.08  | 7.29  |
| Somalia         | SOM | 1991 | 4.40  | 2.12  | 7.29  |
| Somalia         | SOM | 1992 | 4.38  | 2.13  | 7.25  |
| Somalia         | SOM | 1993 | 4.41  | 2.14  | 7.20  |

|             |     |      |       |       |       |
|-------------|-----|------|-------|-------|-------|
| Somalia     | SOM | 1994 | 4.45  | 2.17  | 7.16  |
| Somalia     | SOM | 1995 | 4.52  | 2.20  | 7.12  |
| Somalia     | SOM | 1996 | 4.67  | 2.23  | 7.27  |
| Somalia     | SOM | 1997 | 4.99  | 2.31  | 7.68  |
| Somalia     | SOM | 1998 | 5.54  | 2.62  | 8.38  |
| Somalia     | SOM | 1999 | 6.29  | 3.28  | 9.21  |
| Somalia     | SOM | 2000 | 6.89  | 3.80  | 9.89  |
| Somalia     | SOM | 2001 | 7.49  | 4.29  | 10.62 |
| Somalia     | SOM | 2002 | 8.06  | 4.65  | 11.21 |
| Somalia     | SOM | 2003 | 8.67  | 4.99  | 11.78 |
| Somalia     | SOM | 2004 | 9.34  | 5.31  | 12.40 |
| Somalia     | SOM | 2005 | 9.93  | 5.59  | 12.98 |
| Somalia     | SOM | 2006 | 10.39 | 5.80  | 13.30 |
| Somalia     | SOM | 2007 | 10.84 | 6.06  | 13.79 |
| Somalia     | SOM | 2008 | 11.27 | 6.25  | 14.15 |
| Somalia     | SOM | 2009 | 11.68 | 6.46  | 14.63 |
| Somalia     | SOM | 2010 | 12.31 | 6.76  | 15.24 |
| Somalia     | SOM | 2011 | 12.74 | 6.94  | 15.96 |
| Somalia     | SOM | 2012 | 13.26 | 7.30  | 16.82 |
| Somalia     | SOM | 2013 | 13.69 | 7.48  | 18.70 |
| Somalia     | SOM | 2014 | 14.20 | 7.80  | 20.11 |
| Somalia     | SOM | 2015 | 14.76 | 9.45  | 21.69 |
| Somalia     | SOM | 2016 | 15.48 | 10.58 | 23.06 |
| Somalia     | SOM | 2017 | 16.11 | 11.33 | 24.10 |
| Serbia      | SRB | 1990 | 54.66 | 51.51 | 57.28 |
| Serbia      | SRB | 1991 | 56.90 | 53.39 | 59.68 |
| Serbia      | SRB | 1992 | 55.56 | 51.84 | 58.72 |
| Serbia      | SRB | 1993 | 54.97 | 51.31 | 58.25 |
| Serbia      | SRB | 1994 | 54.97 | 51.67 | 57.89 |
| Serbia      | SRB | 1995 | 54.52 | 51.52 | 57.14 |
| Serbia      | SRB | 1996 | 54.27 | 51.15 | 56.90 |
| Serbia      | SRB | 1997 | 54.00 | 50.79 | 56.58 |
| Serbia      | SRB | 1998 | 56.38 | 53.13 | 59.16 |
| Serbia      | SRB | 1999 | 56.31 | 53.13 | 59.01 |
| Serbia      | SRB | 2000 | 56.50 | 53.25 | 59.16 |
| Serbia      | SRB | 2001 | 57.56 | 54.46 | 60.16 |
| Serbia      | SRB | 2002 | 57.83 | 54.87 | 60.41 |
| Serbia      | SRB | 2003 | 57.88 | 54.98 | 60.34 |
| Serbia      | SRB | 2004 | 58.80 | 55.74 | 61.28 |
| Serbia      | SRB | 2005 | 58.65 | 55.49 | 61.18 |
| Serbia      | SRB | 2006 | 60.13 | 57.08 | 62.74 |
| Serbia      | SRB | 2007 | 61.87 | 59.07 | 64.48 |
| Serbia      | SRB | 2008 | 62.58 | 59.81 | 65.16 |
| Serbia      | SRB | 2009 | 63.31 | 60.63 | 65.87 |
| Serbia      | SRB | 2010 | 64.52 | 61.82 | 67.12 |
| Serbia      | SRB | 2011 | 65.44 | 62.69 | 68.04 |
| Serbia      | SRB | 2012 | 66.45 | 63.69 | 69.00 |
| Serbia      | SRB | 2013 | 67.71 | 64.93 | 70.17 |
| Serbia      | SRB | 2014 | 68.47 | 65.71 | 71.04 |
| Serbia      | SRB | 2015 | 68.98 | 66.23 | 71.54 |
| Serbia      | SRB | 2016 | 70.20 | 67.40 | 72.86 |
| Serbia      | SRB | 2017 | 70.85 | 67.64 | 73.75 |
| South Sudan | SSD | 1990 | 4.52  | 2.69  | 7.54  |
| South Sudan | SSD | 1991 | 4.49  | 2.69  | 7.01  |
| South Sudan | SSD | 1992 | 4.39  | 2.64  | 6.38  |
| South Sudan | SSD | 1993 | 4.32  | 2.60  | 6.08  |
| South Sudan | SSD | 1994 | 4.29  | 2.58  | 5.91  |
| South Sudan | SSD | 1995 | 4.27  | 2.56  | 5.85  |
| South Sudan | SSD | 1996 | 4.28  | 2.57  | 5.83  |
| South Sudan | SSD | 1997 | 4.40  | 2.66  | 5.92  |
| South Sudan | SSD | 1998 | 4.47  | 2.67  | 5.93  |
| South Sudan | SSD | 1999 | 4.58  | 2.73  | 6.00  |

|                       |     |      |       |       |       |
|-----------------------|-----|------|-------|-------|-------|
| South Sudan           | SSD | 2000 | 4.69  | 2.78  | 6.03  |
| South Sudan           | SSD | 2001 | 4.85  | 2.86  | 6.20  |
| South Sudan           | SSD | 2002 | 4.99  | 2.94  | 6.38  |
| South Sudan           | SSD | 2003 | 5.15  | 2.97  | 6.66  |
| South Sudan           | SSD | 2004 | 5.37  | 3.04  | 7.12  |
| South Sudan           | SSD | 2005 | 5.71  | 3.15  | 7.66  |
| South Sudan           | SSD | 2006 | 6.05  | 3.32  | 7.89  |
| South Sudan           | SSD | 2007 | 6.60  | 3.57  | 9.35  |
| South Sudan           | SSD | 2008 | 7.25  | 3.90  | 10.95 |
| South Sudan           | SSD | 2009 | 7.70  | 4.13  | 11.59 |
| South Sudan           | SSD | 2010 | 9.23  | 5.42  | 13.70 |
| South Sudan           | SSD | 2011 | 10.20 | 5.99  | 14.68 |
| South Sudan           | SSD | 2012 | 12.00 | 6.82  | 16.33 |
| South Sudan           | SSD | 2013 | 12.17 | 7.12  | 17.37 |
| South Sudan           | SSD | 2014 | 13.24 | 7.86  | 18.89 |
| South Sudan           | SSD | 2015 | 15.68 | 9.21  | 21.20 |
| South Sudan           | SSD | 2016 | 16.08 | 9.49  | 21.80 |
| South Sudan           | SSD | 2017 | 17.14 | 10.44 | 23.07 |
| Sao Tome and Principe | STP | 1990 | 33.01 | 18.23 | 37.03 |
| Sao Tome and Principe | STP | 1991 | 33.54 | 24.97 | 37.33 |
| Sao Tome and Principe | STP | 1992 | 33.85 | 27.30 | 37.51 |
| Sao Tome and Principe | STP | 1993 | 34.13 | 28.06 | 37.73 |
| Sao Tome and Principe | STP | 1994 | 34.48 | 28.59 | 38.10 |
| Sao Tome and Principe | STP | 1995 | 34.82 | 28.86 | 38.37 |
| Sao Tome and Principe | STP | 1996 | 34.99 | 29.53 | 38.38 |
| Sao Tome and Principe | STP | 1997 | 35.22 | 30.18 | 38.57 |
| Sao Tome and Principe | STP | 1998 | 35.48 | 30.61 | 38.80 |
| Sao Tome and Principe | STP | 1999 | 35.50 | 27.92 | 39.20 |
| Sao Tome and Principe | STP | 2000 | 36.35 | 30.72 | 39.83 |
| Sao Tome and Principe | STP | 2001 | 36.92 | 31.30 | 40.29 |
| Sao Tome and Principe | STP | 2002 | 37.49 | 32.49 | 40.70 |
| Sao Tome and Principe | STP | 2003 | 37.94 | 33.60 | 40.99 |
| Sao Tome and Principe | STP | 2004 | 38.39 | 34.40 | 41.47 |
| Sao Tome and Principe | STP | 2005 | 39.87 | 36.12 | 42.97 |
| Sao Tome and Principe | STP | 2006 | 40.67 | 37.18 | 43.59 |
| Sao Tome and Principe | STP | 2007 | 41.88 | 38.58 | 44.81 |
| Sao Tome and Principe | STP | 2008 | 43.13 | 40.00 | 46.03 |
| Sao Tome and Principe | STP | 2009 | 44.13 | 41.02 | 47.04 |
| Sao Tome and Principe | STP | 2010 | 45.23 | 42.16 | 48.11 |
| Sao Tome and Principe | STP | 2011 | 46.26 | 43.10 | 49.13 |
| Sao Tome and Principe | STP | 2012 | 46.70 | 43.53 | 49.72 |
| Sao Tome and Principe | STP | 2013 | 47.93 | 44.79 | 50.99 |
| Sao Tome and Principe | STP | 2014 | 49.11 | 45.95 | 52.12 |
| Sao Tome and Principe | STP | 2015 | 49.93 | 46.69 | 53.00 |
| Sao Tome and Principe | STP | 2016 | 50.79 | 47.51 | 53.91 |
| Sao Tome and Principe | STP | 2017 | 51.89 | 48.57 | 55.02 |
| Suriname              | SUR | 1990 | 49.69 | 47.26 | 51.93 |
| Suriname              | SUR | 1991 | 49.81 | 47.28 | 52.10 |
| Suriname              | SUR | 1992 | 50.17 | 47.65 | 52.54 |
| Suriname              | SUR | 1993 | 50.04 | 47.48 | 52.43 |
| Suriname              | SUR | 1994 | 50.97 | 48.45 | 53.30 |
| Suriname              | SUR | 1995 | 52.50 | 49.93 | 54.82 |
| Suriname              | SUR | 1996 | 52.87 | 50.28 | 55.20 |
| Suriname              | SUR | 1997 | 53.25 | 50.62 | 55.65 |
| Suriname              | SUR | 1998 | 53.28 | 50.72 | 55.60 |
| Suriname              | SUR | 1999 | 53.11 | 50.59 | 55.38 |
| Suriname              | SUR | 2000 | 53.63 | 51.17 | 55.96 |
| Suriname              | SUR | 2001 | 54.02 | 51.57 | 56.35 |
| Suriname              | SUR | 2002 | 54.42 | 51.98 | 56.75 |
| Suriname              | SUR | 2003 | 55.31 | 52.89 | 57.55 |
| Suriname              | SUR | 2004 | 56.01 | 53.67 | 58.32 |
| Suriname              | SUR | 2005 | 56.76 | 54.53 | 59.04 |

|          |     |      |       |       |       |
|----------|-----|------|-------|-------|-------|
| Suriname | SUR | 2006 | 57.67 | 55.57 | 59.94 |
| Suriname | SUR | 2007 | 58.80 | 56.77 | 61.04 |
| Suriname | SUR | 2008 | 59.67 | 57.64 | 61.86 |
| Suriname | SUR | 2009 | 60.51 | 58.45 | 62.74 |
| Suriname | SUR | 2010 | 61.00 | 58.91 | 63.25 |
| Suriname | SUR | 2011 | 61.63 | 59.50 | 63.84 |
| Suriname | SUR | 2012 | 62.36 | 60.08 | 64.49 |
| Suriname | SUR | 2013 | 62.73 | 60.47 | 64.85 |
| Suriname | SUR | 2014 | 62.97 | 60.64 | 65.20 |
| Suriname | SUR | 2015 | 62.94 | 60.48 | 65.45 |
| Suriname | SUR | 2016 | 63.19 | 60.50 | 65.76 |
| Suriname | SUR | 2017 | 63.47 | 60.63 | 66.17 |
| Slovakia | SVK | 1990 | 62.53 | 60.14 | 64.62 |
| Slovakia | SVK | 1991 | 63.40 | 60.99 | 65.43 |
| Slovakia | SVK | 1992 | 64.36 | 61.98 | 66.40 |
| Slovakia | SVK | 1993 | 65.65 | 63.05 | 67.65 |
| Slovakia | SVK | 1994 | 66.89 | 64.23 | 68.92 |
| Slovakia | SVK | 1995 | 66.97 | 64.24 | 68.95 |
| Slovakia | SVK | 1996 | 68.10 | 65.11 | 70.15 |
| Slovakia | SVK | 1997 | 68.18 | 65.04 | 70.26 |
| Slovakia | SVK | 1998 | 68.13 | 64.91 | 70.33 |
| Slovakia | SVK | 1999 | 68.81 | 65.48 | 71.06 |
| Slovakia | SVK | 2000 | 69.74 | 66.24 | 72.07 |
| Slovakia | SVK | 2001 | 70.64 | 67.20 | 72.92 |
| Slovakia | SVK | 2002 | 70.97 | 67.45 | 73.35 |
| Slovakia | SVK | 2003 | 71.25 | 67.50 | 73.77 |
| Slovakia | SVK | 2004 | 71.97 | 67.68 | 74.77 |
| Slovakia | SVK | 2005 | 71.49 | 66.61 | 74.45 |
| Slovakia | SVK | 2006 | 71.71 | 66.16 | 74.88 |
| Slovakia | SVK | 2007 | 71.68 | 65.80 | 75.07 |
| Slovakia | SVK | 2008 | 72.25 | 66.29 | 75.88 |
| Slovakia | SVK | 2009 | 72.86 | 66.68 | 76.62 |
| Slovakia | SVK | 2010 | 73.44 | 66.04 | 77.65 |
| Slovakia | SVK | 2011 | 73.45 | 64.12 | 78.00 |
| Slovakia | SVK | 2012 | 73.80 | 62.66 | 78.51 |
| Slovakia | SVK | 2013 | 73.99 | 63.04 | 78.99 |
| Slovakia | SVK | 2014 | 73.95 | 60.39 | 79.32 |
| Slovakia | SVK | 2015 | 73.34 | 55.88 | 78.99 |
| Slovakia | SVK | 2016 | 73.80 | 54.98 | 79.80 |
| Slovakia | SVK | 2017 | 74.03 | 55.31 | 80.48 |
| Slovenia | SVN | 1990 | 69.92 | 66.38 | 72.70 |
| Slovenia | SVN | 1991 | 69.31 | 65.72 | 72.17 |
| Slovenia | SVN | 1992 | 69.28 | 65.38 | 72.16 |
| Slovenia | SVN | 1993 | 68.72 | 64.64 | 71.63 |
| Slovenia | SVN | 1994 | 69.54 | 65.30 | 72.56 |
| Slovenia | SVN | 1995 | 70.68 | 66.09 | 73.77 |
| Slovenia | SVN | 1996 | 71.64 | 66.78 | 74.93 |
| Slovenia | SVN | 1997 | 71.73 | 66.44 | 75.36 |
| Slovenia | SVN | 1998 | 71.74 | 65.77 | 75.54 |
| Slovenia | SVN | 1999 | 71.96 | 64.01 | 76.21 |
| Slovenia | SVN | 2000 | 72.23 | 62.29 | 76.90 |
| Slovenia | SVN | 2001 | 72.77 | 62.14 | 77.60 |
| Slovenia | SVN | 2002 | 73.35 | 61.12 | 78.43 |
| Slovenia | SVN | 2003 | 73.22 | 59.06 | 78.70 |
| Slovenia | SVN | 2004 | 73.62 | 54.91 | 79.78 |
| Slovenia | SVN | 2005 | 74.14 | 55.63 | 81.13 |
| Slovenia | SVN | 2006 | 74.17 | 55.96 | 81.49 |
| Slovenia | SVN | 2007 | 74.59 | 56.46 | 82.18 |
| Slovenia | SVN | 2008 | 75.06 | 57.00 | 82.95 |
| Slovenia | SVN | 2009 | 76.04 | 57.64 | 83.83 |
| Slovenia | SVN | 2010 | 75.80 | 58.12 | 84.28 |
| Slovenia | SVN | 2011 | 75.42 | 58.51 | 84.63 |

|          |     |      |       |       |       |
|----------|-----|------|-------|-------|-------|
| Slovenia | SVN | 2012 | 74.99 | 58.69 | 84.55 |
| Slovenia | SVN | 2013 | 74.82 | 59.09 | 85.14 |
| Slovenia | SVN | 2014 | 75.43 | 59.98 | 86.47 |
| Slovenia | SVN | 2015 | 74.92 | 59.90 | 86.25 |
| Slovenia | SVN | 2016 | 74.95 | 60.26 | 86.83 |
| Slovenia | SVN | 2017 | 74.79 | 60.27 | 87.19 |
| Sweden   | SWE | 1990 | 85.64 | 83.21 | 87.56 |
| Sweden   | SWE | 1991 | 85.61 | 83.07 | 87.56 |
| Sweden   | SWE | 1992 | 86.37 | 83.66 | 88.38 |
| Sweden   | SWE | 1993 | 86.77 | 83.94 | 88.87 |
| Sweden   | SWE | 1994 | 87.51 | 84.39 | 89.71 |
| Sweden   | SWE | 1995 | 87.44 | 84.17 | 89.78 |
| Sweden   | SWE | 1996 | 87.69 | 84.34 | 90.11 |
| Sweden   | SWE | 1997 | 88.41 | 84.77 | 91.06 |
| Sweden   | SWE | 1998 | 88.51 | 84.57 | 91.24 |
| Sweden   | SWE | 1999 | 88.61 | 84.43 | 91.42 |
| Sweden   | SWE | 2000 | 89.06 | 84.89 | 91.94 |
| Sweden   | SWE | 2001 | 89.34 | 85.22 | 92.26 |
| Sweden   | SWE | 2002 | 89.82 | 85.60 | 92.77 |
| Sweden   | SWE | 2003 | 90.27 | 85.92 | 93.24 |
| Sweden   | SWE | 2004 | 90.20 | 86.00 | 93.32 |
| Sweden   | SWE | 2005 | 91.15 | 86.81 | 94.31 |
| Sweden   | SWE | 2006 | 91.47 | 86.69 | 94.62 |
| Sweden   | SWE | 2007 | 91.70 | 86.70 | 94.80 |
| Sweden   | SWE | 2008 | 91.84 | 86.48 | 94.92 |
| Sweden   | SWE | 2009 | 91.81 | 86.32 | 95.05 |
| Sweden   | SWE | 2010 | 91.80 | 85.82 | 95.11 |
| Sweden   | SWE | 2011 | 91.61 | 85.66 | 95.01 |
| Sweden   | SWE | 2012 | 91.43 | 85.29 | 94.94 |
| Sweden   | SWE | 2013 | 91.27 | 85.01 | 94.88 |
| Sweden   | SWE | 2014 | 91.05 | 84.75 | 94.72 |
| Sweden   | SWE | 2015 | 90.82 | 84.30 | 94.67 |
| Sweden   | SWE | 2016 | 90.60 | 83.91 | 94.53 |
| Sweden   | SWE | 2017 | 90.54 | 83.67 | 94.46 |
| Eswatini | SWZ | 1990 | 27.65 | 16.50 | 34.59 |
| Eswatini | SWZ | 1991 | 28.88 | 16.87 | 35.26 |
| Eswatini | SWZ | 1992 | 30.27 | 17.35 | 36.26 |
| Eswatini | SWZ | 1993 | 31.63 | 17.71 | 37.19 |
| Eswatini | SWZ | 1994 | 32.21 | 17.99 | 37.40 |
| Eswatini | SWZ | 1995 | 32.15 | 17.75 | 37.23 |
| Eswatini | SWZ | 1996 | 31.77 | 17.67 | 36.96 |
| Eswatini | SWZ | 1997 | 31.79 | 25.01 | 36.84 |
| Eswatini | SWZ | 1998 | 31.01 | 24.85 | 36.21 |
| Eswatini | SWZ | 1999 | 30.33 | 24.14 | 35.65 |
| Eswatini | SWZ | 2000 | 28.78 | 22.48 | 34.22 |
| Eswatini | SWZ | 2001 | 28.08 | 20.36 | 34.09 |
| Eswatini | SWZ | 2002 | 26.70 | 17.61 | 33.54 |
| Eswatini | SWZ | 2003 | 26.10 | 17.12 | 33.62 |
| Eswatini | SWZ | 2004 | 25.78 | 17.08 | 34.12 |
| Eswatini | SWZ | 2005 | 25.42 | 16.96 | 34.25 |
| Eswatini | SWZ | 2006 | 26.60 | 17.35 | 35.30 |
| Eswatini | SWZ | 2007 | 27.59 | 17.75 | 36.45 |
| Eswatini | SWZ | 2008 | 27.86 | 17.76 | 37.08 |
| Eswatini | SWZ | 2009 | 28.27 | 18.15 | 37.82 |
| Eswatini | SWZ | 2010 | 29.44 | 18.48 | 38.83 |
| Eswatini | SWZ | 2011 | 31.55 | 19.78 | 40.47 |
| Eswatini | SWZ | 2012 | 32.91 | 21.43 | 41.38 |
| Eswatini | SWZ | 2013 | 34.57 | 24.50 | 42.74 |
| Eswatini | SWZ | 2014 | 36.94 | 28.46 | 44.25 |
| Eswatini | SWZ | 2015 | 39.14 | 31.91 | 45.67 |
| Eswatini | SWZ | 2016 | 40.78 | 33.79 | 46.99 |
| Eswatini | SWZ | 2017 | 42.66 | 36.04 | 48.48 |

|                      |     |      |       |       |       |
|----------------------|-----|------|-------|-------|-------|
| Seychelles           | SYC | 1990 | 52.98 | 50.24 | 55.55 |
| Seychelles           | SYC | 1991 | 53.17 | 50.47 | 55.68 |
| Seychelles           | SYC | 1992 | 53.34 | 50.67 | 55.86 |
| Seychelles           | SYC | 1993 | 53.64 | 51.00 | 56.12 |
| Seychelles           | SYC | 1994 | 54.10 | 51.52 | 56.57 |
| Seychelles           | SYC | 1995 | 54.70 | 52.11 | 57.10 |
| Seychelles           | SYC | 1996 | 55.26 | 52.77 | 57.56 |
| Seychelles           | SYC | 1997 | 55.98 | 53.37 | 58.31 |
| Seychelles           | SYC | 1998 | 56.54 | 54.00 | 58.86 |
| Seychelles           | SYC | 1999 | 57.49 | 55.06 | 59.79 |
| Seychelles           | SYC | 2000 | 58.36 | 55.93 | 60.64 |
| Seychelles           | SYC | 2001 | 59.13 | 56.66 | 61.34 |
| Seychelles           | SYC | 2002 | 60.14 | 57.63 | 62.34 |
| Seychelles           | SYC | 2003 | 60.81 | 58.16 | 62.98 |
| Seychelles           | SYC | 2004 | 61.46 | 58.82 | 63.60 |
| Seychelles           | SYC | 2005 | 62.42 | 59.84 | 64.64 |
| Seychelles           | SYC | 2006 | 63.51 | 60.95 | 65.74 |
| Seychelles           | SYC | 2007 | 64.08 | 61.46 | 66.30 |
| Seychelles           | SYC | 2008 | 64.68 | 62.06 | 66.92 |
| Seychelles           | SYC | 2009 | 65.21 | 62.72 | 67.48 |
| Seychelles           | SYC | 2010 | 66.02 | 63.48 | 68.27 |
| Seychelles           | SYC | 2011 | 66.74 | 64.24 | 69.00 |
| Seychelles           | SYC | 2012 | 67.26 | 64.72 | 69.54 |
| Seychelles           | SYC | 2013 | 67.70 | 65.16 | 69.99 |
| Seychelles           | SYC | 2014 | 67.97 | 65.43 | 70.35 |
| Seychelles           | SYC | 2015 | 68.13 | 65.55 | 70.46 |
| Seychelles           | SYC | 2016 | 68.39 | 65.82 | 70.81 |
| Seychelles           | SYC | 2017 | 68.78 | 66.21 | 71.26 |
| Syrian Arab Republic | SYR | 1990 | 34.78 | 32.10 | 37.59 |
| Syrian Arab Republic | SYR | 1991 | 35.90 | 33.18 | 38.57 |
| Syrian Arab Republic | SYR | 1992 | 36.66 | 33.85 | 39.40 |
| Syrian Arab Republic | SYR | 1993 | 38.41 | 35.44 | 41.05 |
| Syrian Arab Republic | SYR | 1994 | 39.53 | 36.58 | 42.25 |
| Syrian Arab Republic | SYR | 1995 | 40.73 | 37.76 | 43.39 |
| Syrian Arab Republic | SYR | 1996 | 42.06 | 39.09 | 44.82 |
| Syrian Arab Republic | SYR | 1997 | 43.23 | 40.38 | 45.91 |
| Syrian Arab Republic | SYR | 1998 | 44.43 | 41.55 | 47.19 |
| Syrian Arab Republic | SYR | 1999 | 45.84 | 43.01 | 48.55 |
| Syrian Arab Republic | SYR | 2000 | 47.07 | 44.07 | 49.80 |
| Syrian Arab Republic | SYR | 2001 | 48.57 | 45.52 | 51.42 |
| Syrian Arab Republic | SYR | 2002 | 49.60 | 46.54 | 52.49 |
| Syrian Arab Republic | SYR | 2003 | 50.93 | 47.81 | 53.85 |
| Syrian Arab Republic | SYR | 2004 | 51.33 | 48.20 | 54.33 |
| Syrian Arab Republic | SYR | 2005 | 52.01 | 48.56 | 55.25 |
| Syrian Arab Republic | SYR | 2006 | 52.06 | 47.89 | 55.53 |
| Syrian Arab Republic | SYR | 2007 | 52.69 | 48.53 | 56.11 |
| Syrian Arab Republic | SYR | 2008 | 52.88 | 48.60 | 56.33 |
| Syrian Arab Republic | SYR | 2009 | 53.76 | 49.31 | 57.38 |
| Syrian Arab Republic | SYR | 2010 | 54.54 | 49.97 | 58.25 |
| Syrian Arab Republic | SYR | 2011 | 54.83 | 50.04 | 58.67 |
| Syrian Arab Republic | SYR | 2012 | 54.76 | 49.85 | 58.77 |
| Syrian Arab Republic | SYR | 2013 | 54.76 | 49.41 | 59.10 |
| Syrian Arab Republic | SYR | 2014 | 54.80 | 48.98 | 59.26 |
| Syrian Arab Republic | SYR | 2015 | 55.03 | 48.85 | 59.81 |
| Syrian Arab Republic | SYR | 2016 | 55.46 | 48.60 | 60.44 |
| Syrian Arab Republic | SYR | 2017 | 56.05 | 48.42 | 61.32 |
| Chad                 | TCD | 1990 | 4.40  | 3.85  | 6.86  |
| Chad                 | TCD | 1991 | 4.67  | 4.10  | 7.39  |
| Chad                 | TCD | 1992 | 4.80  | 4.24  | 7.54  |
| Chad                 | TCD | 1993 | 4.94  | 4.31  | 7.83  |
| Chad                 | TCD | 1994 | 5.12  | 4.36  | 8.05  |
| Chad                 | TCD | 1995 | 5.33  | 4.40  | 8.37  |



|          |     |      |       |       |       |
|----------|-----|------|-------|-------|-------|
| Chad     | TCD | 1996 | 5.56  | 4.44  | 8.55  |
| Chad     | TCD | 1997 | 5.53  | 4.47  | 8.52  |
| Chad     | TCD | 1998 | 5.64  | 4.49  | 8.61  |
| Chad     | TCD | 1999 | 5.60  | 4.49  | 8.49  |
| Chad     | TCD | 2000 | 5.66  | 4.48  | 8.47  |
| Chad     | TCD | 2001 | 5.95  | 4.47  | 9.48  |
| Chad     | TCD | 2002 | 6.09  | 4.46  | 9.87  |
| Chad     | TCD | 2003 | 6.40  | 4.44  | 10.41 |
| Chad     | TCD | 2004 | 7.02  | 4.50  | 10.97 |
| Chad     | TCD | 2005 | 8.19  | 5.13  | 12.62 |
| Chad     | TCD | 2006 | 9.12  | 5.73  | 13.88 |
| Chad     | TCD | 2007 | 11.00 | 7.13  | 15.79 |
| Chad     | TCD | 2008 | 12.08 | 7.71  | 16.86 |
| Chad     | TCD | 2009 | 13.75 | 8.66  | 18.67 |
| Chad     | TCD | 2010 | 15.03 | 9.38  | 20.02 |
| Chad     | TCD | 2011 | 16.30 | 9.97  | 21.10 |
| Chad     | TCD | 2012 | 17.74 | 10.66 | 22.67 |
| Chad     | TCD | 2013 | 18.88 | 11.17 | 23.74 |
| Chad     | TCD | 2014 | 20.42 | 11.70 | 24.93 |
| Chad     | TCD | 2015 | 21.72 | 12.24 | 26.09 |
| Chad     | TCD | 2016 | 22.92 | 12.81 | 27.38 |
| Chad     | TCD | 2017 | 23.92 | 13.24 | 28.36 |
| Togo     | TGO | 1990 | 26.39 | 21.32 | 29.59 |
| Togo     | TGO | 1991 | 27.30 | 22.85 | 30.50 |
| Togo     | TGO | 1992 | 28.10 | 24.12 | 31.20 |
| Togo     | TGO | 1993 | 28.61 | 24.73 | 31.68 |
| Togo     | TGO | 1994 | 28.92 | 25.33 | 31.94 |
| Togo     | TGO | 1995 | 29.13 | 25.79 | 32.04 |
| Togo     | TGO | 1996 | 29.18 | 25.99 | 32.03 |
| Togo     | TGO | 1997 | 29.36 | 26.23 | 32.22 |
| Togo     | TGO | 1998 | 29.87 | 26.70 | 32.84 |
| Togo     | TGO | 1999 | 30.73 | 27.48 | 33.64 |
| Togo     | TGO | 2000 | 31.46 | 28.20 | 34.48 |
| Togo     | TGO | 2001 | 32.14 | 28.72 | 35.10 |
| Togo     | TGO | 2002 | 33.79 | 30.43 | 36.89 |
| Togo     | TGO | 2003 | 34.92 | 31.41 | 38.04 |
| Togo     | TGO | 2004 | 35.99 | 32.55 | 39.18 |
| Togo     | TGO | 2005 | 36.74 | 33.28 | 39.92 |
| Togo     | TGO | 2006 | 37.55 | 34.02 | 40.71 |
| Togo     | TGO | 2007 | 38.22 | 34.73 | 41.27 |
| Togo     | TGO | 2008 | 38.80 | 35.31 | 41.98 |
| Togo     | TGO | 2009 | 39.59 | 36.09 | 42.72 |
| Togo     | TGO | 2010 | 40.26 | 36.81 | 43.43 |
| Togo     | TGO | 2011 | 40.84 | 37.22 | 44.02 |
| Togo     | TGO | 2012 | 41.41 | 37.85 | 44.77 |
| Togo     | TGO | 2013 | 42.27 | 38.67 | 45.78 |
| Togo     | TGO | 2014 | 43.06 | 39.45 | 46.59 |
| Togo     | TGO | 2015 | 43.76 | 40.14 | 47.31 |
| Togo     | TGO | 2016 | 44.43 | 40.92 | 47.94 |
| Togo     | TGO | 2017 | 44.89 | 41.35 | 48.36 |
| Thailand | THA | 1990 | 49.86 | 46.75 | 52.24 |
| Thailand | THA | 1991 | 50.70 | 47.76 | 52.93 |
| Thailand | THA | 1992 | 51.67 | 48.86 | 53.88 |
| Thailand | THA | 1993 | 52.36 | 49.43 | 54.61 |
| Thailand | THA | 1994 | 52.85 | 50.06 | 55.16 |
| Thailand | THA | 1995 | 53.48 | 50.64 | 55.77 |
| Thailand | THA | 1996 | 54.06 | 51.13 | 56.43 |
| Thailand | THA | 1997 | 55.94 | 53.04 | 58.38 |
| Thailand | THA | 1998 | 56.86 | 54.11 | 59.34 |
| Thailand | THA | 1999 | 57.21 | 54.30 | 59.63 |
| Thailand | THA | 2000 | 58.63 | 55.77 | 61.12 |
| Thailand | THA | 2001 | 60.27 | 57.44 | 62.77 |

|              |     |      |       |       |       |
|--------------|-----|------|-------|-------|-------|
| Thailand     | THA | 2002 | 61.11 | 58.32 | 63.41 |
| Thailand     | THA | 2003 | 62.36 | 59.49 | 64.67 |
| Thailand     | THA | 2004 | 63.25 | 60.45 | 65.57 |
| Thailand     | THA | 2005 | 64.20 | 61.48 | 66.59 |
| Thailand     | THA | 2006 | 65.02 | 62.52 | 67.40 |
| Thailand     | THA | 2007 | 65.84 | 63.07 | 68.20 |
| Thailand     | THA | 2008 | 66.62 | 63.88 | 69.03 |
| Thailand     | THA | 2009 | 67.43 | 64.62 | 69.79 |
| Thailand     | THA | 2010 | 67.87 | 65.07 | 70.23 |
| Thailand     | THA | 2011 | 68.45 | 65.64 | 70.94 |
| Thailand     | THA | 2012 | 69.02 | 66.13 | 71.52 |
| Thailand     | THA | 2013 | 69.72 | 66.79 | 72.37 |
| Thailand     | THA | 2014 | 70.09 | 67.03 | 72.73 |
| Thailand     | THA | 2015 | 70.44 | 67.39 | 73.16 |
| Thailand     | THA | 2016 | 70.44 | 67.25 | 73.31 |
| Thailand     | THA | 2017 | 70.85 | 67.46 | 73.76 |
| Tajikistan   | TJK | 1990 | 52.39 | 49.59 | 55.00 |
| Tajikistan   | TJK | 1991 | 51.83 | 49.06 | 54.43 |
| Tajikistan   | TJK | 1992 | 50.26 | 47.48 | 52.87 |
| Tajikistan   | TJK | 1993 | 49.45 | 46.77 | 52.06 |
| Tajikistan   | TJK | 1994 | 48.02 | 45.28 | 50.64 |
| Tajikistan   | TJK | 1995 | 48.12 | 45.36 | 50.78 |
| Tajikistan   | TJK | 1996 | 48.52 | 45.57 | 51.14 |
| Tajikistan   | TJK | 1997 | 50.14 | 47.30 | 52.69 |
| Tajikistan   | TJK | 1998 | 51.44 | 48.51 | 53.98 |
| Tajikistan   | TJK | 1999 | 52.95 | 50.09 | 55.44 |
| Tajikistan   | TJK | 2000 | 53.72 | 51.02 | 56.03 |
| Tajikistan   | TJK | 2001 | 54.10 | 51.56 | 56.45 |
| Tajikistan   | TJK | 2002 | 54.47 | 52.03 | 56.85 |
| Tajikistan   | TJK | 2003 | 54.86 | 52.47 | 57.14 |
| Tajikistan   | TJK | 2004 | 55.43 | 53.02 | 57.65 |
| Tajikistan   | TJK | 2005 | 54.61 | 52.16 | 56.82 |
| Tajikistan   | TJK | 2006 | 55.27 | 52.82 | 57.46 |
| Tajikistan   | TJK | 2007 | 55.36 | 53.00 | 57.56 |
| Tajikistan   | TJK | 2008 | 55.56 | 53.22 | 57.71 |
| Tajikistan   | TJK | 2009 | 55.84 | 53.50 | 58.04 |
| Tajikistan   | TJK | 2010 | 56.24 | 53.92 | 58.33 |
| Tajikistan   | TJK | 2011 | 56.59 | 54.35 | 58.75 |
| Tajikistan   | TJK | 2012 | 57.33 | 55.27 | 59.45 |
| Tajikistan   | TJK | 2013 | 57.96 | 55.96 | 60.03 |
| Tajikistan   | TJK | 2014 | 58.10 | 55.90 | 60.25 |
| Tajikistan   | TJK | 2015 | 58.04 | 55.71 | 60.35 |
| Tajikistan   | TJK | 2016 | 58.04 | 55.49 | 60.51 |
| Tajikistan   | TJK | 2017 | 58.34 | 55.57 | 61.21 |
| Turkmenistan | TKM | 1990 | 47.57 | 44.50 | 50.11 |
| Turkmenistan | TKM | 1991 | 46.85 | 43.76 | 49.40 |
| Turkmenistan | TKM | 1992 | 46.06 | 42.96 | 48.64 |
| Turkmenistan | TKM | 1993 | 42.04 | 38.60 | 44.98 |
| Turkmenistan | TKM | 1994 | 40.35 | 36.65 | 43.47 |
| Turkmenistan | TKM | 1995 | 40.62 | 36.91 | 43.72 |
| Turkmenistan | TKM | 1996 | 39.34 | 35.06 | 42.65 |
| Turkmenistan | TKM | 1997 | 40.72 | 36.87 | 43.91 |
| Turkmenistan | TKM | 1998 | 43.43 | 39.97 | 46.34 |
| Turkmenistan | TKM | 1999 | 46.09 | 42.90 | 48.72 |
| Turkmenistan | TKM | 2000 | 48.02 | 44.44 | 50.67 |
| Turkmenistan | TKM | 2001 | 48.72 | 44.82 | 51.47 |
| Turkmenistan | TKM | 2002 | 47.74 | 43.65 | 50.62 |
| Turkmenistan | TKM | 2003 | 46.17 | 41.91 | 49.29 |
| Turkmenistan | TKM | 2004 | 43.93 | 39.05 | 47.36 |
| Turkmenistan | TKM | 2005 | 41.79 | 36.16 | 45.71 |
| Turkmenistan | TKM | 2006 | 42.23 | 35.55 | 46.39 |
| Turkmenistan | TKM | 2007 | 44.17 | 36.74 | 48.23 |

|              |     |      |       |       |       |
|--------------|-----|------|-------|-------|-------|
| Turkmenistan | TKM | 2008 | 47.47 | 40.43 | 51.39 |
| Turkmenistan | TKM | 2009 | 51.43 | 44.25 | 55.31 |
| Turkmenistan | TKM | 2010 | 53.62 | 46.27 | 57.55 |
| Turkmenistan | TKM | 2011 | 54.19 | 46.41 | 58.27 |
| Turkmenistan | TKM | 2012 | 54.18 | 46.59 | 58.34 |
| Turkmenistan | TKM | 2013 | 53.55 | 44.20 | 58.00 |
| Turkmenistan | TKM | 2014 | 53.12 | 41.73 | 57.82 |
| Turkmenistan | TKM | 2015 | 52.83 | 39.91 | 57.97 |
| Turkmenistan | TKM | 2016 | 52.64 | 39.82 | 58.29 |
| Turkmenistan | TKM | 2017 | 52.62 | 39.83 | 58.78 |
| Timor-Leste  | TLS | 1990 | 7.15  | 3.73  | 10.41 |
| Timor-Leste  | TLS | 1991 | 8.05  | 4.13  | 11.49 |
| Timor-Leste  | TLS | 1992 | 9.13  | 5.08  | 12.71 |
| Timor-Leste  | TLS | 1993 | 9.96  | 5.43  | 13.64 |
| Timor-Leste  | TLS | 1994 | 10.97 | 6.16  | 14.86 |
| Timor-Leste  | TLS | 1995 | 11.74 | 6.64  | 15.89 |
| Timor-Leste  | TLS | 1996 | 13.35 | 7.79  | 17.65 |
| Timor-Leste  | TLS | 1997 | 13.87 | 7.69  | 18.35 |
| Timor-Leste  | TLS | 1998 | 14.71 | 8.14  | 19.19 |
| Timor-Leste  | TLS | 1999 | 14.50 | 8.07  | 19.33 |
| Timor-Leste  | TLS | 2000 | 15.98 | 9.05  | 20.58 |
| Timor-Leste  | TLS | 2001 | 17.28 | 9.57  | 21.89 |
| Timor-Leste  | TLS | 2002 | 19.33 | 10.32 | 23.67 |
| Timor-Leste  | TLS | 2003 | 19.42 | 10.70 | 23.73 |
| Timor-Leste  | TLS | 2004 | 21.22 | 11.73 | 25.16 |
| Timor-Leste  | TLS | 2005 | 22.49 | 16.71 | 26.24 |
| Timor-Leste  | TLS | 2006 | 23.72 | 19.64 | 27.32 |
| Timor-Leste  | TLS | 2007 | 25.39 | 22.24 | 29.01 |
| Timor-Leste  | TLS | 2008 | 26.14 | 22.77 | 29.84 |
| Timor-Leste  | TLS | 2009 | 27.83 | 24.44 | 32.74 |
| Timor-Leste  | TLS | 2010 | 30.17 | 25.52 | 36.01 |
| Timor-Leste  | TLS | 2011 | 32.74 | 27.49 | 38.15 |
| Timor-Leste  | TLS | 2012 | 35.74 | 30.20 | 40.63 |
| Timor-Leste  | TLS | 2013 | 37.75 | 32.86 | 42.26 |
| Timor-Leste  | TLS | 2014 | 39.14 | 34.56 | 43.62 |
| Timor-Leste  | TLS | 2015 | 40.76 | 36.15 | 45.36 |
| Timor-Leste  | TLS | 2016 | 42.17 | 37.37 | 46.84 |
| Timor-Leste  | TLS | 2017 | 43.17 | 38.25 | 47.86 |
| Tonga        | TON | 1990 | 46.43 | 43.06 | 49.59 |
| Tonga        | TON | 1991 | 46.75 | 43.39 | 49.78 |
| Tonga        | TON | 1992 | 47.02 | 43.43 | 50.15 |
| Tonga        | TON | 1993 | 47.15 | 43.63 | 50.42 |
| Tonga        | TON | 1994 | 47.16 | 43.40 | 50.44 |
| Tonga        | TON | 1995 | 47.15 | 43.04 | 50.60 |
| Tonga        | TON | 1996 | 46.96 | 42.36 | 50.51 |
| Tonga        | TON | 1997 | 46.77 | 41.55 | 50.58 |
| Tonga        | TON | 1998 | 45.90 | 38.78 | 50.14 |
| Tonga        | TON | 1999 | 44.84 | 33.63 | 49.70 |
| Tonga        | TON | 2000 | 43.66 | 32.80 | 49.28 |
| Tonga        | TON | 2001 | 45.29 | 33.96 | 50.07 |
| Tonga        | TON | 2002 | 46.62 | 39.99 | 50.99 |
| Tonga        | TON | 2003 | 47.68 | 42.48 | 51.63 |
| Tonga        | TON | 2004 | 48.59 | 44.02 | 52.47 |
| Tonga        | TON | 2005 | 50.06 | 45.83 | 53.78 |
| Tonga        | TON | 2006 | 50.26 | 46.35 | 53.87 |
| Tonga        | TON | 2007 | 50.66 | 46.91 | 54.26 |
| Tonga        | TON | 2008 | 50.82 | 47.06 | 54.51 |
| Tonga        | TON | 2009 | 51.05 | 47.16 | 54.93 |
| Tonga        | TON | 2010 | 50.92 | 46.84 | 54.97 |
| Tonga        | TON | 2011 | 51.73 | 47.62 | 55.86 |
| Tonga        | TON | 2012 | 51.61 | 47.59 | 55.76 |
| Tonga        | TON | 2013 | 51.73 | 47.52 | 55.96 |

|                     |     |      |       |       |       |
|---------------------|-----|------|-------|-------|-------|
| Tonga               | TON | 2014 | 51.92 | 47.56 | 56.35 |
| Tonga               | TON | 2015 | 52.15 | 47.44 | 56.47 |
| Tonga               | TON | 2016 | 52.62 | 47.77 | 57.14 |
| Tonga               | TON | 2017 | 52.92 | 47.91 | 57.53 |
| Trinidad and Tobago | TTO | 1990 | 49.54 | 47.43 | 51.39 |
| Trinidad and Tobago | TTO | 1991 | 50.24 | 48.14 | 52.13 |
| Trinidad and Tobago | TTO | 1992 | 50.58 | 48.42 | 52.41 |
| Trinidad and Tobago | TTO | 1993 | 49.83 | 47.86 | 51.79 |
| Trinidad and Tobago | TTO | 1994 | 49.69 | 47.71 | 51.53 |
| Trinidad and Tobago | TTO | 1995 | 51.42 | 49.56 | 53.11 |
| Trinidad and Tobago | TTO | 1996 | 51.47 | 49.67 | 53.17 |
| Trinidad and Tobago | TTO | 1997 | 53.17 | 51.44 | 54.93 |
| Trinidad and Tobago | TTO | 1998 | 52.92 | 51.18 | 54.68 |
| Trinidad and Tobago | TTO | 1999 | 53.43 | 51.69 | 55.06 |
| Trinidad and Tobago | TTO | 2000 | 55.53 | 53.90 | 57.12 |
| Trinidad and Tobago | TTO | 2001 | 57.01 | 55.24 | 58.70 |
| Trinidad and Tobago | TTO | 2002 | 58.80 | 57.02 | 60.50 |
| Trinidad and Tobago | TTO | 2003 | 58.78 | 56.93 | 60.60 |
| Trinidad and Tobago | TTO | 2004 | 59.44 | 57.48 | 61.37 |
| Trinidad and Tobago | TTO | 2005 | 60.54 | 58.36 | 62.62 |
| Trinidad and Tobago | TTO | 2006 | 61.93 | 59.46 | 64.21 |
| Trinidad and Tobago | TTO | 2007 | 62.42 | 59.73 | 64.74 |
| Trinidad and Tobago | TTO | 2008 | 62.25 | 59.45 | 64.68 |
| Trinidad and Tobago | TTO | 2009 | 63.59 | 60.64 | 66.10 |
| Trinidad and Tobago | TTO | 2010 | 64.68 | 61.59 | 67.45 |
| Trinidad and Tobago | TTO | 2011 | 65.53 | 62.18 | 68.19 |
| Trinidad and Tobago | TTO | 2012 | 65.72 | 62.15 | 68.64 |
| Trinidad and Tobago | TTO | 2013 | 65.59 | 61.68 | 68.98 |
| Trinidad and Tobago | TTO | 2014 | 65.56 | 61.33 | 69.56 |
| Trinidad and Tobago | TTO | 2015 | 65.51 | 60.94 | 69.89 |
| Trinidad and Tobago | TTO | 2016 | 65.33 | 60.35 | 70.12 |
| Trinidad and Tobago | TTO | 2017 | 65.36 | 60.00 | 70.46 |
| Tunisia             | TUN | 1990 | 48.02 | 45.88 | 50.20 |
| Tunisia             | TUN | 1991 | 48.32 | 46.13 | 50.52 |
| Tunisia             | TUN | 1992 | 48.98 | 46.83 | 51.16 |
| Tunisia             | TUN | 1993 | 49.72 | 47.53 | 51.87 |
| Tunisia             | TUN | 1994 | 50.43 | 48.21 | 52.61 |
| Tunisia             | TUN | 1995 | 51.14 | 48.89 | 53.40 |
| Tunisia             | TUN | 1996 | 52.28 | 49.85 | 54.52 |
| Tunisia             | TUN | 1997 | 53.25 | 50.72 | 55.50 |
| Tunisia             | TUN | 1998 | 54.34 | 51.94 | 56.60 |
| Tunisia             | TUN | 1999 | 55.50 | 52.95 | 57.90 |
| Tunisia             | TUN | 2000 | 56.37 | 53.35 | 59.07 |
| Tunisia             | TUN | 2001 | 57.89 | 54.70 | 60.61 |
| Tunisia             | TUN | 2002 | 58.90 | 55.53 | 61.83 |
| Tunisia             | TUN | 2003 | 59.92 | 56.33 | 62.98 |
| Tunisia             | TUN | 2004 | 60.62 | 56.97 | 63.88 |
| Tunisia             | TUN | 2005 | 61.33 | 57.45 | 64.79 |
| Tunisia             | TUN | 2006 | 62.08 | 57.96 | 65.74 |
| Tunisia             | TUN | 2007 | 62.96 | 58.67 | 66.68 |
| Tunisia             | TUN | 2008 | 63.58 | 59.02 | 67.42 |
| Tunisia             | TUN | 2009 | 64.37 | 59.61 | 68.46 |
| Tunisia             | TUN | 2010 | 65.14 | 60.06 | 69.29 |
| Tunisia             | TUN | 2011 | 65.78 | 60.58 | 70.03 |
| Tunisia             | TUN | 2012 | 66.54 | 61.48 | 70.84 |
| Tunisia             | TUN | 2013 | 66.97 | 61.53 | 71.41 |
| Tunisia             | TUN | 2014 | 67.29 | 61.11 | 71.93 |
| Tunisia             | TUN | 2015 | 67.67 | 60.63 | 72.59 |
| Tunisia             | TUN | 2016 | 68.09 | 60.82 | 73.29 |
| Tunisia             | TUN | 2017 | 68.57 | 61.17 | 74.01 |
| Turkey              | TUR | 1990 | 41.93 | 39.43 | 44.31 |
| Turkey              | TUR | 1991 | 42.50 | 40.07 | 44.76 |

|                          |     |      |       |       |       |
|--------------------------|-----|------|-------|-------|-------|
| Turkey                   | TUR | 1992 | 43.21 | 40.76 | 45.44 |
| Turkey                   | TUR | 1993 | 43.97 | 41.66 | 46.14 |
| Turkey                   | TUR | 1994 | 44.51 | 42.09 | 46.64 |
| Turkey                   | TUR | 1995 | 45.32 | 43.01 | 47.54 |
| Turkey                   | TUR | 1996 | 46.55 | 44.39 | 48.61 |
| Turkey                   | TUR | 1997 | 47.80 | 45.67 | 49.79 |
| Turkey                   | TUR | 1998 | 49.08 | 46.89 | 51.05 |
| Turkey                   | TUR | 1999 | 50.21 | 47.96 | 52.15 |
| Turkey                   | TUR | 2000 | 51.92 | 49.66 | 54.06 |
| Turkey                   | TUR | 2001 | 53.22 | 51.12 | 55.35 |
| Turkey                   | TUR | 2002 | 54.30 | 52.13 | 56.44 |
| Turkey                   | TUR | 2003 | 55.28 | 53.02 | 57.46 |
| Turkey                   | TUR | 2004 | 56.46 | 53.98 | 58.81 |
| Turkey                   | TUR | 2005 | 57.37 | 54.76 | 59.76 |
| Turkey                   | TUR | 2006 | 58.84 | 56.04 | 61.26 |
| Turkey                   | TUR | 2007 | 59.66 | 56.56 | 62.13 |
| Turkey                   | TUR | 2008 | 60.26 | 56.81 | 62.93 |
| Turkey                   | TUR | 2009 | 60.16 | 56.38 | 62.92 |
| Turkey                   | TUR | 2010 | 60.57 | 56.21 | 63.47 |
| Turkey                   | TUR | 2011 | 61.14 | 56.25 | 64.17 |
| Turkey                   | TUR | 2012 | 61.62 | 56.05 | 64.96 |
| Turkey                   | TUR | 2013 | 61.83 | 55.40 | 65.52 |
| Turkey                   | TUR | 2014 | 61.89 | 53.61 | 66.09 |
| Turkey                   | TUR | 2015 | 62.17 | 51.07 | 66.83 |
| Turkey                   | TUR | 2016 | 62.39 | 47.20 | 67.56 |
| Turkey                   | TUR | 2017 | 62.60 | 47.15 | 68.35 |
| aiwan (Province of Chin: | TWN | 1990 | 62.15 | 58.95 | 65.06 |
| aiwan (Province of Chin: | TWN | 1991 | 63.21 | 59.74 | 66.25 |
| aiwan (Province of Chin: | TWN | 1992 | 64.15 | 60.52 | 67.32 |
| aiwan (Province of Chin: | TWN | 1993 | 64.86 | 61.09 | 68.07 |
| aiwan (Province of Chin: | TWN | 1994 | 65.58 | 61.62 | 68.77 |
| aiwan (Province of Chin: | TWN | 1995 | 66.23 | 62.30 | 69.41 |
| aiwan (Province of Chin: | TWN | 1996 | 66.84 | 62.79 | 69.97 |
| aiwan (Province of Chin: | TWN | 1997 | 68.05 | 63.56 | 71.33 |
| aiwan (Province of Chin: | TWN | 1998 | 68.56 | 63.95 | 72.02 |
| aiwan (Province of Chin: | TWN | 1999 | 69.61 | 64.96 | 73.07 |
| aiwan (Province of Chin: | TWN | 2000 | 69.95 | 64.87 | 73.48 |
| aiwan (Province of Chin: | TWN | 2001 | 70.59 | 65.15 | 74.13 |
| aiwan (Province of Chin: | TWN | 2002 | 71.96 | 65.80 | 75.73 |
| aiwan (Province of Chin: | TWN | 2003 | 72.54 | 65.57 | 76.41 |
| aiwan (Province of Chin: | TWN | 2004 | 72.43 | 64.10 | 76.69 |
| aiwan (Province of Chin: | TWN | 2005 | 72.40 | 63.07 | 76.93 |
| aiwan (Province of Chin: | TWN | 2006 | 72.89 | 62.63 | 77.82 |
| aiwan (Province of Chin: | TWN | 2007 | 72.82 | 58.13 | 78.35 |
| aiwan (Province of Chin: | TWN | 2008 | 72.40 | 53.90 | 78.71 |
| aiwan (Province of Chin: | TWN | 2009 | 72.46 | 54.53 | 79.37 |
| aiwan (Province of Chin: | TWN | 2010 | 72.31 | 54.84 | 79.78 |
| aiwan (Province of Chin: | TWN | 2011 | 71.88 | 54.80 | 79.60 |
| aiwan (Province of Chin: | TWN | 2012 | 72.01 | 55.23 | 80.24 |
| aiwan (Province of Chin: | TWN | 2013 | 72.24 | 55.73 | 80.98 |
| aiwan (Province of Chin: | TWN | 2014 | 71.91 | 55.84 | 80.95 |
| aiwan (Province of Chin: | TWN | 2015 | 72.06 | 56.30 | 81.57 |
| aiwan (Province of Chin: | TWN | 2016 | 71.62 | 56.34 | 81.62 |
| aiwan (Province of Chin: | TWN | 2017 | 71.49 | 56.47 | 81.97 |
| ited Republic of Tanzar  | TZA | 1990 | 31.90 | 28.34 | 37.13 |
| ited Republic of Tanzar  | TZA | 1991 | 32.50 | 28.95 | 37.31 |
| ited Republic of Tanzar  | TZA | 1992 | 32.86 | 29.70 | 37.03 |
| ited Republic of Tanzar  | TZA | 1993 | 33.17 | 30.26 | 36.70 |
| ited Republic of Tanzar  | TZA | 1994 | 33.50 | 30.83 | 36.42 |
| ited Republic of Tanzar  | TZA | 1995 | 33.99 | 31.60 | 36.57 |
| ited Republic of Tanzar  | TZA | 1996 | 34.59 | 32.08 | 37.11 |
| ited Republic of Tanzar  | TZA | 1997 | 35.35 | 32.77 | 37.73 |

|                             |     |      |       |       |       |
|-----------------------------|-----|------|-------|-------|-------|
| United Republic of Tanzania | TZA | 1998 | 36.17 | 33.49 | 38.59 |
| United Republic of Tanzania | TZA | 1999 | 37.31 | 34.67 | 39.64 |
| United Republic of Tanzania | TZA | 2000 | 38.54 | 35.99 | 40.91 |
| United Republic of Tanzania | TZA | 2001 | 39.95 | 37.32 | 42.32 |
| United Republic of Tanzania | TZA | 2002 | 41.57 | 38.97 | 43.96 |
| United Republic of Tanzania | TZA | 2003 | 42.79 | 40.12 | 45.16 |
| United Republic of Tanzania | TZA | 2004 | 43.81 | 41.22 | 46.21 |
| United Republic of Tanzania | TZA | 2005 | 44.86 | 42.29 | 47.25 |
| United Republic of Tanzania | TZA | 2006 | 45.69 | 43.16 | 48.10 |
| United Republic of Tanzania | TZA | 2007 | 46.36 | 43.95 | 48.74 |
| United Republic of Tanzania | TZA | 2008 | 47.12 | 44.77 | 49.66 |
| United Republic of Tanzania | TZA | 2009 | 48.07 | 45.53 | 50.62 |
| United Republic of Tanzania | TZA | 2010 | 48.98 | 46.52 | 51.51 |
| United Republic of Tanzania | TZA | 2011 | 49.51 | 47.05 | 52.05 |
| United Republic of Tanzania | TZA | 2012 | 49.85 | 47.36 | 52.44 |
| United Republic of Tanzania | TZA | 2013 | 50.19 | 47.55 | 52.84 |
| United Republic of Tanzania | TZA | 2014 | 50.73 | 48.04 | 53.50 |
| United Republic of Tanzania | TZA | 2015 | 51.45 | 48.67 | 54.24 |
| United Republic of Tanzania | TZA | 2016 | 52.15 | 49.21 | 55.17 |
| United Republic of Tanzania | TZA | 2017 | 52.77 | 49.81 | 55.72 |
| Uganda                      | UGA | 1990 | 14.03 | 11.79 | 15.86 |
| Uganda                      | UGA | 1991 | 13.76 | 11.59 | 15.55 |
| Uganda                      | UGA | 1992 | 13.91 | 11.92 | 15.67 |
| Uganda                      | UGA | 1993 | 13.71 | 11.61 | 15.50 |
| Uganda                      | UGA | 1994 | 13.51 | 11.35 | 15.24 |
| Uganda                      | UGA | 1995 | 13.37 | 11.17 | 15.14 |
| Uganda                      | UGA | 1996 | 13.10 | 10.75 | 15.04 |
| Uganda                      | UGA | 1997 | 13.27 | 11.07 | 15.15 |
| Uganda                      | UGA | 1998 | 13.29 | 11.10 | 15.10 |
| Uganda                      | UGA | 1999 | 13.69 | 11.55 | 15.47 |
| Uganda                      | UGA | 2000 | 14.16 | 12.14 | 15.89 |
| Uganda                      | UGA | 2001 | 15.29 | 13.79 | 16.70 |
| Uganda                      | UGA | 2002 | 15.80 | 14.35 | 17.19 |
| Uganda                      | UGA | 2003 | 16.41 | 15.03 | 17.67 |
| Uganda                      | UGA | 2004 | 17.15 | 15.81 | 18.44 |
| Uganda                      | UGA | 2005 | 17.83 | 16.56 | 19.02 |
| Uganda                      | UGA | 2006 | 18.34 | 17.00 | 19.62 |
| Uganda                      | UGA | 2007 | 18.94 | 17.61 | 20.22 |
| Uganda                      | UGA | 2008 | 19.46 | 17.97 | 20.71 |
| Uganda                      | UGA | 2009 | 19.85 | 18.27 | 21.36 |
| Uganda                      | UGA | 2010 | 20.46 | 18.66 | 31.91 |
| Uganda                      | UGA | 2011 | 21.12 | 18.99 | 34.85 |
| Uganda                      | UGA | 2012 | 21.72 | 19.25 | 37.16 |
| Uganda                      | UGA | 2013 | 22.22 | 19.49 | 38.37 |
| Uganda                      | UGA | 2014 | 22.86 | 19.75 | 39.20 |
| Uganda                      | UGA | 2015 | 23.80 | 20.12 | 40.44 |
| Uganda                      | UGA | 2016 | 24.82 | 20.46 | 41.52 |
| Uganda                      | UGA | 2017 | 25.67 | 20.77 | 42.81 |
| Ukraine                     | UKR | 1990 | 62.78 | 60.29 | 64.97 |
| Ukraine                     | UKR | 1991 | 61.01 | 58.51 | 63.29 |
| Ukraine                     | UKR | 1992 | 59.05 | 56.51 | 61.45 |
| Ukraine                     | UKR | 1993 | 57.40 | 54.65 | 59.82 |
| Ukraine                     | UKR | 1994 | 55.48 | 52.73 | 57.95 |
| Ukraine                     | UKR | 1995 | 51.10 | 47.92 | 53.98 |
| Ukraine                     | UKR | 1996 | 53.01 | 50.00 | 55.69 |
| Ukraine                     | UKR | 1997 | 56.66 | 54.05 | 58.98 |
| Ukraine                     | UKR | 1998 | 60.37 | 57.98 | 62.48 |
| Ukraine                     | UKR | 1999 | 59.45 | 57.06 | 61.64 |
| Ukraine                     | UKR | 2000 | 58.57 | 56.13 | 60.81 |
| Ukraine                     | UKR | 2001 | 59.93 | 57.61 | 62.13 |
| Ukraine                     | UKR | 2002 | 59.45 | 57.02 | 61.66 |
| Ukraine                     | UKR | 2003 | 59.75 | 57.31 | 61.93 |

|                          |     |      |       |       |       |
|--------------------------|-----|------|-------|-------|-------|
| Ukraine                  | UKR | 2004 | 58.77 | 56.18 | 61.14 |
| Ukraine                  | UKR | 2005 | 58.01 | 55.42 | 60.44 |
| Ukraine                  | UKR | 2006 | 61.00 | 58.57 | 63.21 |
| Ukraine                  | UKR | 2007 | 59.90 | 57.23 | 62.20 |
| Ukraine                  | UKR | 2008 | 60.50 | 57.85 | 62.77 |
| Ukraine                  | UKR | 2009 | 66.53 | 64.30 | 68.41 |
| Ukraine                  | UKR | 2010 | 68.74 | 66.46 | 70.59 |
| Ukraine                  | UKR | 2011 | 70.50 | 68.18 | 72.34 |
| Ukraine                  | UKR | 2012 | 70.81 | 68.49 | 72.70 |
| Ukraine                  | UKR | 2013 | 71.04 | 68.70 | 72.99 |
| Ukraine                  | UKR | 2014 | 72.27 | 69.84 | 74.35 |
| Ukraine                  | UKR | 2015 | 64.32 | 61.95 | 66.46 |
| Ukraine                  | UKR | 2016 | 65.50 | 63.15 | 67.66 |
| Ukraine                  | UKR | 2017 | 68.25 | 65.50 | 70.76 |
| Uruguay                  | URY | 1990 | 28.81 | 26.07 | 52.15 |
| Uruguay                  | URY | 1991 | 29.89 | 26.58 | 53.83 |
| Uruguay                  | URY | 1992 | 30.38 | 26.64 | 54.08 |
| Uruguay                  | URY | 1993 | 30.62 | 26.46 | 54.37 |
| Uruguay                  | URY | 1994 | 31.45 | 26.64 | 55.43 |
| Uruguay                  | URY | 1995 | 32.29 | 26.76 | 56.28 |
| Uruguay                  | URY | 1996 | 33.46 | 27.00 | 57.14 |
| Uruguay                  | URY | 1997 | 35.24 | 27.48 | 58.49 |
| Uruguay                  | URY | 1998 | 36.99 | 27.51 | 58.98 |
| Uruguay                  | URY | 1999 | 39.12 | 27.66 | 59.87 |
| Uruguay                  | URY | 2000 | 40.98 | 27.89 | 60.60 |
| Uruguay                  | URY | 2001 | 43.12 | 28.20 | 61.53 |
| Uruguay                  | URY | 2002 | 44.96 | 28.20 | 61.88 |
| Uruguay                  | URY | 2003 | 47.23 | 28.35 | 62.52 |
| Uruguay                  | URY | 2004 | 49.55 | 28.47 | 63.18 |
| Uruguay                  | URY | 2005 | 52.13 | 28.72 | 64.04 |
| Uruguay                  | URY | 2006 | 54.55 | 29.14 | 65.28 |
| Uruguay                  | URY | 2007 | 55.86 | 29.01 | 65.19 |
| Uruguay                  | URY | 2008 | 57.98 | 29.45 | 66.39 |
| Uruguay                  | URY | 2009 | 59.82 | 29.73 | 67.10 |
| Uruguay                  | URY | 2010 | 61.18 | 29.87 | 67.59 |
| Uruguay                  | URY | 2011 | 62.34 | 30.07 | 68.22 |
| Uruguay                  | URY | 2012 | 63.33 | 30.29 | 68.63 |
| Uruguay                  | URY | 2013 | 64.46 | 49.83 | 69.31 |
| Uruguay                  | URY | 2014 | 65.57 | 56.00 | 70.02 |
| Uruguay                  | URY | 2015 | 66.08 | 58.27 | 70.28 |
| Uruguay                  | URY | 2016 | 66.58 | 59.13 | 70.86 |
| Uruguay                  | URY | 2017 | 67.01 | 60.07 | 71.60 |
| United States of America | USA | 1990 | 78.36 | 76.48 | 80.03 |
| United States of America | USA | 1991 | 78.68 | 76.85 | 80.25 |
| United States of America | USA | 1992 | 79.24 | 77.41 | 80.79 |
| United States of America | USA | 1993 | 79.31 | 77.50 | 80.80 |
| United States of America | USA | 1994 | 79.82 | 78.05 | 81.23 |
| United States of America | USA | 1995 | 80.07 | 78.37 | 81.44 |
| United States of America | USA | 1996 | 81.08 | 79.38 | 82.49 |
| United States of America | USA | 1997 | 81.47 | 79.83 | 82.90 |
| United States of America | USA | 1998 | 81.83 | 80.14 | 83.27 |
| United States of America | USA | 1999 | 81.84 | 80.11 | 83.33 |
| United States of America | USA | 2000 | 81.90 | 80.11 | 83.47 |
| United States of America | USA | 2001 | 82.06 | 80.23 | 83.72 |
| United States of America | USA | 2002 | 82.12 | 80.15 | 83.81 |
| United States of America | USA | 2003 | 82.43 | 80.48 | 84.15 |
| United States of America | USA | 2004 | 83.11 | 81.06 | 84.91 |
| United States of America | USA | 2005 | 83.52 | 81.41 | 85.23 |
| United States of America | USA | 2006 | 84.05 | 82.00 | 85.76 |
| United States of America | USA | 2007 | 84.57 | 82.46 | 86.33 |
| United States of America | USA | 2008 | 84.79 | 82.57 | 86.63 |
| United States of America | USA | 2009 | 85.05 | 82.77 | 86.93 |

|                          |     |      |       |       |       |
|--------------------------|-----|------|-------|-------|-------|
| United States of America | USA | 2010 | 85.63 | 83.21 | 87.53 |
| United States of America | USA | 2011 | 85.87 | 83.33 | 87.76 |
| United States of America | USA | 2012 | 86.15 | 83.49 | 88.12 |
| United States of America | USA | 2013 | 86.35 | 83.65 | 88.46 |
| United States of America | USA | 2014 | 86.24 | 83.35 | 88.49 |
| United States of America | USA | 2015 | 86.01 | 82.87 | 88.41 |
| United States of America | USA | 2016 | 85.51 | 82.04 | 88.08 |
| United States of America | USA | 2017 | 85.30 | 81.65 | 87.95 |
| Uzbekistan               | UZB | 1990 | 46.23 | 35.63 | 50.81 |
| Uzbekistan               | UZB | 1991 | 45.93 | 35.91 | 50.34 |
| Uzbekistan               | UZB | 1992 | 45.54 | 35.78 | 49.76 |
| Uzbekistan               | UZB | 1993 | 44.18 | 34.92 | 48.46 |
| Uzbekistan               | UZB | 1994 | 42.75 | 34.00 | 47.13 |
| Uzbekistan               | UZB | 1995 | 42.05 | 33.75 | 46.68 |
| Uzbekistan               | UZB | 1996 | 40.41 | 33.35 | 45.94 |
| Uzbekistan               | UZB | 1997 | 42.94 | 34.32 | 47.28 |
| Uzbekistan               | UZB | 1998 | 44.80 | 39.31 | 48.26 |
| Uzbekistan               | UZB | 1999 | 46.75 | 42.95 | 49.80 |
| Uzbekistan               | UZB | 2000 | 47.59 | 44.42 | 50.38 |
| Uzbekistan               | UZB | 2001 | 48.23 | 45.14 | 50.82 |
| Uzbekistan               | UZB | 2002 | 48.47 | 45.39 | 51.03 |
| Uzbekistan               | UZB | 2003 | 48.35 | 45.30 | 51.07 |
| Uzbekistan               | UZB | 2004 | 47.90 | 44.85 | 50.67 |
| Uzbekistan               | UZB | 2005 | 47.54 | 44.38 | 50.49 |
| Uzbekistan               | UZB | 2006 | 49.82 | 46.39 | 52.89 |
| Uzbekistan               | UZB | 2007 | 51.27 | 47.87 | 54.37 |
| Uzbekistan               | UZB | 2008 | 52.62 | 49.17 | 55.59 |
| Uzbekistan               | UZB | 2009 | 54.25 | 50.88 | 57.01 |
| Uzbekistan               | UZB | 2010 | 55.47 | 51.86 | 58.26 |
| Uzbekistan               | UZB | 2011 | 56.08 | 52.37 | 59.01 |
| Uzbekistan               | UZB | 2012 | 56.56 | 52.69 | 59.45 |
| Uzbekistan               | UZB | 2013 | 56.80 | 52.62 | 59.77 |
| Uzbekistan               | UZB | 2014 | 56.81 | 52.04 | 59.98 |
| Uzbekistan               | UZB | 2015 | 57.02 | 51.39 | 60.65 |
| Uzbekistan               | UZB | 2016 | 57.52 | 50.88 | 61.81 |
| Uzbekistan               | UZB | 2017 | 58.00 | 50.14 | 62.98 |
| t Vincent and the Grenad | VCT | 1990 | 50.60 | 48.14 | 52.84 |
| t Vincent and the Grenad | VCT | 1991 | 50.96 | 48.46 | 53.18 |
| t Vincent and the Grenad | VCT | 1992 | 51.45 | 49.01 | 53.66 |
| t Vincent and the Grenad | VCT | 1993 | 51.73 | 49.30 | 53.93 |
| t Vincent and the Grenad | VCT | 1994 | 51.69 | 49.29 | 53.85 |
| t Vincent and the Grenad | VCT | 1995 | 52.17 | 49.73 | 54.30 |
| t Vincent and the Grenad | VCT | 1996 | 52.12 | 49.75 | 54.23 |
| t Vincent and the Grenad | VCT | 1997 | 52.05 | 49.70 | 54.14 |
| t Vincent and the Grenad | VCT | 1998 | 52.63 | 50.36 | 54.69 |
| t Vincent and the Grenad | VCT | 1999 | 53.83 | 51.56 | 55.94 |
| t Vincent and the Grenad | VCT | 2000 | 54.81 | 52.51 | 56.88 |
| t Vincent and the Grenad | VCT | 2001 | 55.59 | 53.26 | 57.74 |
| t Vincent and the Grenad | VCT | 2002 | 56.19 | 53.86 | 58.39 |
| t Vincent and the Grenad | VCT | 2003 | 56.83 | 54.40 | 59.01 |
| t Vincent and the Grenad | VCT | 2004 | 57.29 | 54.83 | 59.50 |
| t Vincent and the Grenad | VCT | 2005 | 57.81 | 55.27 | 60.07 |
| t Vincent and the Grenad | VCT | 2006 | 58.46 | 55.89 | 60.70 |
| t Vincent and the Grenad | VCT | 2007 | 58.98 | 56.42 | 61.26 |
| t Vincent and the Grenad | VCT | 2008 | 59.37 | 56.76 | 61.65 |
| t Vincent and the Grenad | VCT | 2009 | 59.68 | 57.08 | 61.91 |
| t Vincent and the Grenad | VCT | 2010 | 59.83 | 57.34 | 62.05 |
| t Vincent and the Grenad | VCT | 2011 | 59.74 | 57.12 | 61.94 |
| t Vincent and the Grenad | VCT | 2012 | 59.47 | 56.80 | 61.67 |
| t Vincent and the Grenad | VCT | 2013 | 59.30 | 56.63 | 61.59 |
| t Vincent and the Grenad | VCT | 2014 | 59.23 | 56.55 | 61.59 |
| t Vincent and the Grenad | VCT | 2015 | 59.33 | 56.72 | 61.77 |



|                              |     |      |       |       |       |
|------------------------------|-----|------|-------|-------|-------|
| t Vincent and the Grenadines | VCT | 2016 | 59.64 | 57.03 | 62.17 |
| t Vincent and the Grenadines | VCT | 2017 | 59.93 | 57.39 | 62.51 |
| zuela (Bolivarian Republic)  | VEN | 1990 | 49.49 | 46.78 | 51.93 |
| zuela (Bolivarian Republic)  | VEN | 1991 | 50.49 | 47.64 | 52.93 |
| zuela (Bolivarian Republic)  | VEN | 1992 | 51.18 | 48.16 | 53.64 |
| zuela (Bolivarian Republic)  | VEN | 1993 | 51.86 | 48.88 | 54.24 |
| zuela (Bolivarian Republic)  | VEN | 1994 | 51.99 | 49.04 | 54.32 |
| zuela (Bolivarian Republic)  | VEN | 1995 | 52.51 | 49.40 | 55.02 |
| zuela (Bolivarian Republic)  | VEN | 1996 | 53.45 | 50.12 | 56.02 |
| zuela (Bolivarian Republic)  | VEN | 1997 | 54.56 | 51.22 | 57.21 |
| zuela (Bolivarian Republic)  | VEN | 1998 | 55.07 | 51.77 | 57.57 |
| zuela (Bolivarian Republic)  | VEN | 1999 | 55.88 | 52.83 | 58.31 |
| zuela (Bolivarian Republic)  | VEN | 2000 | 57.06 | 53.99 | 59.45 |
| zuela (Bolivarian Republic)  | VEN | 2001 | 57.63 | 54.49 | 60.05 |
| zuela (Bolivarian Republic)  | VEN | 2002 | 58.01 | 54.85 | 60.41 |
| zuela (Bolivarian Republic)  | VEN | 2003 | 57.92 | 54.76 | 60.29 |
| zuela (Bolivarian Republic)  | VEN | 2004 | 59.49 | 56.45 | 61.87 |
| zuela (Bolivarian Republic)  | VEN | 2005 | 60.49 | 57.47 | 62.87 |
| zuela (Bolivarian Republic)  | VEN | 2006 | 61.27 | 58.26 | 63.65 |
| zuela (Bolivarian Republic)  | VEN | 2007 | 61.98 | 58.95 | 64.38 |
| zuela (Bolivarian Republic)  | VEN | 2008 | 62.28 | 59.40 | 64.68 |
| zuela (Bolivarian Republic)  | VEN | 2009 | 62.96 | 60.19 | 65.36 |
| zuela (Bolivarian Republic)  | VEN | 2010 | 63.85 | 61.05 | 66.31 |
| zuela (Bolivarian Republic)  | VEN | 2011 | 63.94 | 60.92 | 66.47 |
| zuela (Bolivarian Republic)  | VEN | 2012 | 63.77 | 60.56 | 66.40 |
| zuela (Bolivarian Republic)  | VEN | 2013 | 63.94 | 60.55 | 66.78 |
| zuela (Bolivarian Republic)  | VEN | 2014 | 63.92 | 60.34 | 66.86 |
| zuela (Bolivarian Republic)  | VEN | 2015 | 63.98 | 60.01 | 67.07 |
| zuela (Bolivarian Republic)  | VEN | 2016 | 63.99 | 59.50 | 67.46 |
| zuela (Bolivarian Republic)  | VEN | 2017 | 63.97 | 58.96 | 67.85 |
| ited States Virgin Islands   | VIR | 1990 | 63.79 | 58.64 | 67.71 |
| ited States Virgin Islands   | VIR | 1991 | 63.68 | 56.65 | 68.15 |
| ited States Virgin Islands   | VIR | 1992 | 63.09 | 53.34 | 68.15 |
| ited States Virgin Islands   | VIR | 1993 | 62.13 | 46.47 | 67.95 |
| ited States Virgin Islands   | VIR | 1994 | 60.82 | 45.90 | 67.48 |
| ited States Virgin Islands   | VIR | 1995 | 60.49 | 46.10 | 67.61 |
| ited States Virgin Islands   | VIR | 1996 | 59.96 | 46.20 | 67.72 |
| ited States Virgin Islands   | VIR | 1997 | 59.80 | 46.61 | 68.07 |
| ited States Virgin Islands   | VIR | 1998 | 59.62 | 46.83 | 68.36 |
| ited States Virgin Islands   | VIR | 1999 | 59.28 | 46.82 | 68.27 |
| ited States Virgin Islands   | VIR | 2000 | 59.04 | 46.99 | 68.25 |
| ited States Virgin Islands   | VIR | 2001 | 57.38 | 47.18 | 67.97 |
| ited States Virgin Islands   | VIR | 2002 | 56.04 | 47.58 | 67.87 |
| ited States Virgin Islands   | VIR | 2003 | 55.23 | 47.93 | 67.79 |
| ited States Virgin Islands   | VIR | 2004 | 54.71 | 48.17 | 67.83 |
| ited States Virgin Islands   | VIR | 2005 | 54.61 | 48.48 | 67.98 |
| ited States Virgin Islands   | VIR | 2006 | 54.82 | 48.62 | 68.67 |
| ited States Virgin Islands   | VIR | 2007 | 54.41 | 48.78 | 68.41 |
| ited States Virgin Islands   | VIR | 2008 | 54.63 | 48.90 | 68.50 |
| ited States Virgin Islands   | VIR | 2009 | 55.74 | 49.03 | 69.23 |
| ited States Virgin Islands   | VIR | 2010 | 57.35 | 49.03 | 70.12 |
| ited States Virgin Islands   | VIR | 2011 | 58.82 | 49.17 | 70.96 |
| ited States Virgin Islands   | VIR | 2012 | 60.21 | 49.19 | 71.75 |
| ited States Virgin Islands   | VIR | 2013 | 59.93 | 49.11 | 71.76 |
| ited States Virgin Islands   | VIR | 2014 | 59.83 | 49.04 | 71.79 |
| ited States Virgin Islands   | VIR | 2015 | 59.59 | 48.84 | 71.52 |
| ited States Virgin Islands   | VIR | 2016 | 59.89 | 49.01 | 72.05 |
| ited States Virgin Islands   | VIR | 2017 | 59.98 | 49.10 | 72.15 |
| Viet Nam                     | VNM | 1990 | 38.95 | 32.19 | 43.12 |
| Viet Nam                     | VNM | 1991 | 39.55 | 34.15 | 43.51 |
| Viet Nam                     | VNM | 1992 | 40.18 | 35.02 | 43.94 |
| Viet Nam                     | VNM | 1993 | 40.86 | 35.89 | 44.50 |

|          |     |      |       |       |       |
|----------|-----|------|-------|-------|-------|
| Viet Nam | VNM | 1994 | 41.65 | 37.11 | 45.10 |
| Viet Nam | VNM | 1995 | 42.54 | 38.04 | 45.98 |
| Viet Nam | VNM | 1996 | 43.60 | 39.31 | 46.95 |
| Viet Nam | VNM | 1997 | 44.90 | 40.64 | 48.14 |
| Viet Nam | VNM | 1998 | 46.09 | 42.04 | 49.22 |
| Viet Nam | VNM | 1999 | 47.28 | 43.24 | 50.32 |
| Viet Nam | VNM | 2000 | 48.54 | 44.57 | 51.62 |
| Viet Nam | VNM | 2001 | 49.69 | 45.88 | 52.75 |
| Viet Nam | VNM | 2002 | 51.03 | 47.25 | 53.97 |
| Viet Nam | VNM | 2003 | 52.24 | 48.58 | 55.25 |
| Viet Nam | VNM | 2004 | 53.47 | 49.97 | 56.40 |
| Viet Nam | VNM | 2005 | 54.66 | 51.12 | 57.52 |
| Viet Nam | VNM | 2006 | 55.75 | 52.20 | 58.62 |
| Viet Nam | VNM | 2007 | 56.69 | 53.29 | 59.57 |
| Viet Nam | VNM | 2008 | 57.59 | 54.19 | 60.46 |
| Viet Nam | VNM | 2009 | 58.41 | 55.00 | 61.25 |
| Viet Nam | VNM | 2010 | 59.35 | 56.06 | 62.22 |
| Viet Nam | VNM | 2011 | 60.17 | 56.97 | 63.18 |
| Viet Nam | VNM | 2012 | 61.01 | 57.72 | 64.11 |
| Viet Nam | VNM | 2013 | 61.67 | 58.39 | 64.80 |
| Viet Nam | VNM | 2014 | 62.18 | 58.83 | 65.40 |
| Viet Nam | VNM | 2015 | 62.93 | 59.53 | 66.27 |
| Viet Nam | VNM | 2016 | 63.53 | 60.05 | 66.92 |
| Viet Nam | VNM | 2017 | 64.10 | 60.42 | 67.55 |
| Vanuatu  | VUT | 1990 | 18.40 | 15.62 | 27.64 |
| Vanuatu  | VUT | 1991 | 18.74 | 15.79 | 28.20 |
| Vanuatu  | VUT | 1992 | 19.05 | 15.98 | 28.69 |
| Vanuatu  | VUT | 1993 | 19.34 | 16.13 | 29.10 |
| Vanuatu  | VUT | 1994 | 19.63 | 16.28 | 29.54 |
| Vanuatu  | VUT | 1995 | 19.92 | 16.42 | 29.98 |
| Vanuatu  | VUT | 1996 | 20.28 | 16.58 | 30.37 |
| Vanuatu  | VUT | 1997 | 20.80 | 16.90 | 31.10 |
| Vanuatu  | VUT | 1998 | 21.71 | 17.64 | 32.48 |
| Vanuatu  | VUT | 1999 | 21.86 | 17.65 | 32.66 |
| Vanuatu  | VUT | 2000 | 22.13 | 17.81 | 33.15 |
| Vanuatu  | VUT | 2001 | 22.35 | 17.98 | 33.50 |
| Vanuatu  | VUT | 2002 | 22.03 | 17.59 | 33.18 |
| Vanuatu  | VUT | 2003 | 22.29 | 17.64 | 33.47 |
| Vanuatu  | VUT | 2004 | 22.42 | 17.70 | 33.63 |
| Vanuatu  | VUT | 2005 | 22.60 | 17.75 | 34.01 |
| Vanuatu  | VUT | 2006 | 23.15 | 17.96 | 34.59 |
| Vanuatu  | VUT | 2007 | 23.47 | 17.99 | 34.71 |
| Vanuatu  | VUT | 2008 | 24.15 | 18.33 | 35.58 |
| Vanuatu  | VUT | 2009 | 25.01 | 18.87 | 36.93 |
| Vanuatu  | VUT | 2010 | 25.55 | 18.97 | 37.39 |
| Vanuatu  | VUT | 2011 | 26.05 | 19.13 | 37.89 |
| Vanuatu  | VUT | 2012 | 26.62 | 19.27 | 38.31 |
| Vanuatu  | VUT | 2013 | 27.26 | 19.53 | 38.95 |
| Vanuatu  | VUT | 2014 | 27.68 | 19.56 | 39.05 |
| Vanuatu  | VUT | 2015 | 27.96 | 19.70 | 39.27 |
| Vanuatu  | VUT | 2016 | 28.55 | 20.00 | 39.82 |
| Vanuatu  | VUT | 2017 | 29.07 | 20.22 | 40.23 |
| Samoa    | WSM | 1990 | 47.95 | 43.64 | 51.90 |
| Samoa    | WSM | 1991 | 48.25 | 43.98 | 52.36 |
| Samoa    | WSM | 1992 | 48.49 | 44.14 | 52.63 |
| Samoa    | WSM | 1993 | 48.85 | 44.58 | 52.96 |
| Samoa    | WSM | 1994 | 49.09 | 44.85 | 53.01 |
| Samoa    | WSM | 1995 | 49.41 | 45.14 | 53.26 |
| Samoa    | WSM | 1996 | 49.70 | 45.51 | 53.37 |
| Samoa    | WSM | 1997 | 50.14 | 46.07 | 53.80 |
| Samoa    | WSM | 1998 | 50.59 | 46.60 | 54.13 |
| Samoa    | WSM | 1999 | 51.03 | 47.19 | 54.53 |

|              |     |      |       |       |       |
|--------------|-----|------|-------|-------|-------|
| Samoa        | WSM | 2000 | 51.54 | 47.75 | 55.00 |
| Samoa        | WSM | 2001 | 51.75 | 47.90 | 55.24 |
| Samoa        | WSM | 2002 | 52.00 | 48.18 | 55.49 |
| Samoa        | WSM | 2003 | 52.18 | 48.54 | 55.68 |
| Samoa        | WSM | 2004 | 52.24 | 48.70 | 55.85 |
| Samoa        | WSM | 2005 | 52.67 | 49.03 | 56.29 |
| Samoa        | WSM | 2006 | 53.05 | 49.23 | 56.74 |
| Samoa        | WSM | 2007 | 52.90 | 49.03 | 56.68 |
| Samoa        | WSM | 2008 | 53.11 | 49.27 | 56.78 |
| Samoa        | WSM | 2009 | 53.22 | 49.36 | 56.85 |
| Samoa        | WSM | 2010 | 53.64 | 49.76 | 57.29 |
| Samoa        | WSM | 2011 | 53.56 | 49.70 | 57.30 |
| Samoa        | WSM | 2012 | 53.77 | 49.92 | 57.61 |
| Samoa        | WSM | 2013 | 53.86 | 49.94 | 57.61 |
| Samoa        | WSM | 2014 | 53.72 | 49.70 | 57.60 |
| Samoa        | WSM | 2015 | 54.20 | 50.08 | 57.98 |
| Samoa        | WSM | 2016 | 54.48 | 50.19 | 58.33 |
| Samoa        | WSM | 2017 | 54.78 | 50.41 | 58.73 |
| Yemen        | YEM | 1990 | 8.93  | 4.72  | 13.38 |
| Yemen        | YEM | 1991 | 10.08 | 5.32  | 14.78 |
| Yemen        | YEM | 1992 | 11.28 | 6.05  | 16.20 |
| Yemen        | YEM | 1993 | 12.70 | 6.90  | 17.66 |
| Yemen        | YEM | 1994 | 13.96 | 7.65  | 19.12 |
| Yemen        | YEM | 1995 | 15.71 | 8.80  | 20.79 |
| Yemen        | YEM | 1996 | 17.30 | 9.73  | 22.58 |
| Yemen        | YEM | 1997 | 19.04 | 10.81 | 24.45 |
| Yemen        | YEM | 1998 | 20.95 | 11.88 | 26.34 |
| Yemen        | YEM | 1999 | 22.57 | 13.06 | 28.05 |
| Yemen        | YEM | 2000 | 24.11 | 14.39 | 29.57 |
| Yemen        | YEM | 2001 | 25.71 | 17.03 | 31.24 |
| Yemen        | YEM | 2002 | 27.19 | 19.09 | 32.69 |
| Yemen        | YEM | 2003 | 28.73 | 21.10 | 34.08 |
| Yemen        | YEM | 2004 | 30.06 | 22.02 | 35.33 |
| Yemen        | YEM | 2005 | 31.33 | 24.13 | 36.52 |
| Yemen        | YEM | 2006 | 32.45 | 25.78 | 37.59 |
| Yemen        | YEM | 2007 | 34.05 | 27.40 | 39.12 |
| Yemen        | YEM | 2008 | 35.03 | 28.74 | 40.06 |
| Yemen        | YEM | 2009 | 35.87 | 29.56 | 40.86 |
| Yemen        | YEM | 2010 | 36.85 | 30.63 | 41.79 |
| Yemen        | YEM | 2011 | 37.50 | 31.26 | 42.35 |
| Yemen        | YEM | 2012 | 38.20 | 31.98 | 43.05 |
| Yemen        | YEM | 2013 | 39.00 | 32.74 | 43.81 |
| Yemen        | YEM | 2014 | 39.33 | 32.95 | 44.17 |
| Yemen        | YEM | 2015 | 39.23 | 32.88 | 44.08 |
| Yemen        | YEM | 2016 | 39.27 | 32.88 | 44.16 |
| Yemen        | YEM | 2017 | 39.17 | 32.83 | 44.24 |
| South Africa | ZAF | 1990 | 45.55 | 42.03 | 48.56 |
| South Africa | ZAF | 1991 | 46.48 | 43.16 | 49.33 |
| South Africa | ZAF | 1992 | 46.85 | 43.81 | 49.41 |
| South Africa | ZAF | 1993 | 48.14 | 45.21 | 50.66 |
| South Africa | ZAF | 1994 | 48.10 | 45.36 | 50.47 |
| South Africa | ZAF | 1995 | 48.67 | 46.14 | 50.92 |
| South Africa | ZAF | 1996 | 46.85 | 44.39 | 49.05 |
| South Africa | ZAF | 1997 | 44.51 | 42.05 | 46.72 |
| South Africa | ZAF | 1998 | 43.71 | 41.12 | 46.00 |
| South Africa | ZAF | 1999 | 43.70 | 41.19 | 45.94 |
| South Africa | ZAF | 2000 | 42.62 | 40.08 | 44.89 |
| South Africa | ZAF | 2001 | 44.61 | 42.08 | 46.80 |
| South Africa | ZAF | 2002 | 45.20 | 42.68 | 47.28 |
| South Africa | ZAF | 2003 | 45.57 | 42.98 | 47.73 |
| South Africa | ZAF | 2004 | 46.35 | 43.73 | 48.56 |
| South Africa | ZAF | 2005 | 47.20 | 44.58 | 49.43 |

|              |     |      |       |       |       |
|--------------|-----|------|-------|-------|-------|
| South Africa | ZAF | 2006 | 47.92 | 45.15 | 50.23 |
| South Africa | ZAF | 2007 | 49.26 | 46.24 | 51.66 |
| South Africa | ZAF | 2008 | 50.41 | 47.12 | 52.86 |
| South Africa | ZAF | 2009 | 51.36 | 47.70 | 54.01 |
| South Africa | ZAF | 2010 | 52.37 | 48.29 | 55.12 |
| South Africa | ZAF | 2011 | 53.90 | 49.84 | 56.77 |
| South Africa | ZAF | 2012 | 54.92 | 50.77 | 57.98 |
| South Africa | ZAF | 2013 | 55.60 | 50.74 | 58.92 |
| South Africa | ZAF | 2014 | 55.91 | 50.06 | 59.53 |
| South Africa | ZAF | 2015 | 55.81 | 48.86 | 59.79 |
| South Africa | ZAF | 2016 | 55.70 | 46.88 | 59.97 |
| South Africa | ZAF | 2017 | 56.56 | 45.15 | 61.16 |
| Zambia       | ZMB | 1990 | 27.11 | 14.74 | 32.11 |
| Zambia       | ZMB | 1991 | 27.43 | 21.89 | 32.02 |
| Zambia       | ZMB | 1992 | 27.29 | 23.07 | 31.18 |
| Zambia       | ZMB | 1993 | 27.14 | 23.50 | 30.76 |
| Zambia       | ZMB | 1994 | 26.89 | 23.72 | 30.25 |
| Zambia       | ZMB | 1995 | 26.66 | 23.72 | 29.77 |
| Zambia       | ZMB | 1996 | 26.78 | 23.92 | 29.82 |
| Zambia       | ZMB | 1997 | 27.25 | 24.35 | 30.23 |
| Zambia       | ZMB | 1998 | 27.94 | 25.16 | 30.85 |
| Zambia       | ZMB | 1999 | 29.30 | 26.45 | 32.15 |
| Zambia       | ZMB | 2000 | 30.83 | 27.90 | 33.52 |
| Zambia       | ZMB | 2001 | 32.33 | 29.43 | 35.00 |
| Zambia       | ZMB | 2002 | 34.00 | 31.25 | 36.73 |
| Zambia       | ZMB | 2003 | 35.36 | 32.53 | 38.11 |
| Zambia       | ZMB | 2004 | 36.34 | 33.06 | 39.08 |
| Zambia       | ZMB | 2005 | 37.22 | 33.48 | 40.18 |
| Zambia       | ZMB | 2006 | 37.47 | 33.17 | 40.80 |
| Zambia       | ZMB | 2007 | 38.45 | 33.61 | 41.88 |
| Zambia       | ZMB | 2008 | 38.20 | 31.10 | 42.13 |
| Zambia       | ZMB | 2009 | 37.22 | 30.61 | 42.30 |
| Zambia       | ZMB | 2010 | 37.58 | 30.88 | 42.95 |
| Zambia       | ZMB | 2011 | 38.44 | 31.46 | 44.17 |
| Zambia       | ZMB | 2012 | 39.34 | 32.08 | 45.37 |
| Zambia       | ZMB | 2013 | 40.89 | 32.95 | 47.05 |
| Zambia       | ZMB | 2014 | 41.18 | 33.44 | 47.97 |
| Zambia       | ZMB | 2015 | 40.60 | 33.70 | 48.58 |
| Zambia       | ZMB | 2016 | 40.09 | 33.94 | 48.92 |
| Zambia       | ZMB | 2017 | 40.45 | 34.30 | 49.59 |
| Zimbabwe     | ZWE | 1990 | 41.23 | 22.44 | 46.10 |
| Zimbabwe     | ZWE | 1991 | 42.71 | 35.43 | 47.40 |
| Zimbabwe     | ZWE | 1992 | 43.34 | 37.50 | 47.78 |
| Zimbabwe     | ZWE | 1993 | 43.75 | 38.15 | 47.82 |
| Zimbabwe     | ZWE | 1994 | 43.87 | 38.93 | 47.86 |
| Zimbabwe     | ZWE | 1995 | 43.38 | 38.51 | 47.34 |
| Zimbabwe     | ZWE | 1996 | 43.50 | 38.69 | 47.31 |
| Zimbabwe     | ZWE | 1997 | 42.63 | 38.16 | 46.52 |
| Zimbabwe     | ZWE | 1998 | 40.75 | 36.44 | 44.67 |
| Zimbabwe     | ZWE | 1999 | 38.84 | 34.55 | 42.72 |
| Zimbabwe     | ZWE | 2000 | 36.89 | 32.73 | 40.72 |
| Zimbabwe     | ZWE | 2001 | 35.90 | 31.74 | 39.67 |
| Zimbabwe     | ZWE | 2002 | 34.41 | 30.32 | 38.14 |
| Zimbabwe     | ZWE | 2003 | 34.10 | 29.71 | 37.71 |
| Zimbabwe     | ZWE | 2004 | 34.08 | 29.39 | 37.72 |
| Zimbabwe     | ZWE | 2005 | 34.32 | 29.02 | 38.10 |
| Zimbabwe     | ZWE | 2006 | 34.69 | 29.40 | 38.71 |
| Zimbabwe     | ZWE | 2007 | 35.05 | 29.63 | 39.16 |
| Zimbabwe     | ZWE | 2008 | 34.79 | 29.15 | 39.16 |
| Zimbabwe     | ZWE | 2009 | 35.14 | 29.65 | 39.55 |
| Zimbabwe     | ZWE | 2010 | 36.49 | 31.09 | 41.09 |
| Zimbabwe     | ZWE | 2011 | 38.63 | 33.29 | 43.23 |

|          |     |      |       |       |       |
|----------|-----|------|-------|-------|-------|
| Zimbabwe | ZWE | 2012 | 40.35 | 34.88 | 44.93 |
| Zimbabwe | ZWE | 2013 | 42.11 | 36.88 | 46.56 |
| Zimbabwe | ZWE | 2014 | 43.54 | 38.28 | 47.98 |
| Zimbabwe | ZWE | 2015 | 44.65 | 39.51 | 49.13 |
| Zimbabwe | ZWE | 2016 | 45.73 | 40.55 | 50.17 |
| Zimbabwe | ZWE | 2017 | 46.68 | 41.55 | 51.18 |

Supplementary table 3. Standard deviation and interquartile range of Fatty Liver Disease-SDG score by super-region in 2017

| <b>Super region name</b>                         | <b>Standard deviation</b> | <b>Interquartile range</b> |
|--------------------------------------------------|---------------------------|----------------------------|
| High-income                                      | 6.2                       | 8.4                        |
| Central Europe, Eastern Europe, and Central Asia | 8.3                       | 12.8                       |
| Latin America and Caribbean                      | 8.4                       | 9.4                        |
| South Asia                                       | 4.9                       | 5.1                        |
| Southeast Asia, East Asia, and Oceania           | 15.6                      | 21.5                       |
| North Africa and Middle East                     | 13.6                      | 15.5                       |
| Sub-Saharan Africa                               | 12.3                      | 15.9                       |

Supplementary table 4. Percentage change of Fatty Liver Disease-SDG score between 1990 and 2017

| Country name           | Percentage change %, (95% CI) |
|------------------------|-------------------------------|
|                        | 7.63                          |
| Armenia                | (-14.7–23.9)                  |
|                        | -2.62                         |
| Azerbaijan             | (-21.2–14.9)                  |
|                        | -5.50                         |
| Georgia                | (-24.2–12.7)                  |
|                        | 16.9                          |
| Kazakhstan             | (6.93–24.0)                   |
|                        | 38.6                          |
| Kyrgyzstan             | (30.8–47.3)                   |
|                        | 52.9                          |
| Mongolia               | (35.3–76.3)                   |
|                        | 11.4                          |
| Tajikistan             | (4.37–19.1)                   |
|                        | 10.6                          |
| Turkmenistan           | (-15.4–24.7)                  |
|                        | 26.2                          |
| Uzbekistan             | (7.68–63.3)                   |
|                        | 43.2                          |
| Albania                | (0.0593–85.6)                 |
|                        | 19.8                          |
| Bosnia and Herzegovina | (-7.10–32.3)                  |
|                        | 6.02                          |
| Bulgaria               | (-20.2–18.9)                  |
|                        | 12.7                          |
| Croatia                | (-14.2–24.6)                  |
|                        | 25.2                          |
| Czechia                | (2.03–36.2)                   |
|                        | 25.3                          |
| Hungary                | (1.48–36.9)                   |
|                        | -9.51                         |
| Montenegro             | (-22.8–9.27)                  |
|                        | 15.8                          |
| North Macedonia        | (6.41–24.5)                   |
|                        | 30.4                          |
| Poland                 | (21.3–37.7)                   |
|                        | 14.4                          |
| Romania                | (-3.46–23.7)                  |
|                        | 29.7                          |
| Serbia                 | (21.7–38.4)                   |
|                        | 18.4                          |
| Slovakia               | (-11.2–29.4)                  |
|                        | 6.98                          |
| Slovenia               | (-15.2–24.4)                  |
|                        | 21.8                          |
| Belarus                | (15.0–27.8)                   |
|                        | 22.0                          |
| Estonia                | (7.58–31.1)                   |
|                        | 17.8                          |
| Latvia                 | (10.3–24.3)                   |
|                        | 14.4                          |
| Lithuania              | (8.88–19.0)                   |
|                        | 24.3                          |
| Republic of Moldova    | (19.3–29.5)                   |
|                        | 22.2                          |
| Russian Federation     | (11.2–30.9)                   |
|                        | 8.74                          |
| Ukraine                | (3.59–14.4)                   |
|                        | 13.0                          |
| Australia              | (6.27–18.0)                   |

|                          |              |
|--------------------------|--------------|
|                          | 4.84         |
| New Zealand              | (-19.0–17.6) |
|                          | 34.7         |
| Brunei Darussalam        | (25.5–42.9)  |
|                          | 8.95         |
| Japan                    | (5.86–11.9)  |
|                          | 34.2         |
| Republic of Korea        | (20.1–43.3)  |
|                          | 34.9         |
| Singapore                | (27.3–41.0)  |
|                          | 7.99         |
| Canada                   | (-1.52–14.7) |
|                          | 28.8         |
| Greenland                | (20.9–36.8)  |
|                          | 8.87         |
| United States of America | (3.64–13.4)  |
|                          | 24.7         |
| Argentina                | (18.6–31.3)  |
|                          | 26.5         |
| Chile                    | (18.4–33.3)  |
|                          | 141          |
| Uruguay                  | (29.4–170)   |
|                          | -5.89        |
| Andorra                  | (-25.1–11.6) |
|                          | 10.2         |
| Austria                  | (-4.52–18.2) |
|                          | 14.5         |
| Belgium                  | (2.59–22.2)  |
|                          | 17.2         |
| Cyprus                   | (8.29–23.1)  |
|                          | 9.40         |
| Denmark                  | (-12.3–19.2) |
|                          | 17.0         |
| Finland                  | (10.5–22.2)  |
|                          | 12.4         |
| France                   | (4.08–18.0)  |
|                          | 7.19         |
| Germany                  | (-1.81–13.9) |
|                          | 7.23         |
| Greece                   | (-9.87–16.0) |
|                          | -3.14        |
| Iceland                  | (-24.3–11.2) |
|                          | 21.2         |
| Ireland                  | (3.47–31.3)  |
|                          | 12.5         |
| Israel                   | (5.69–18.0)  |
|                          | 9.33         |
| Italy                    | (-17.5–20.8) |
|                          | 0.325        |
| Luxembourg               | (-18.0–18.8) |
|                          | 14.0         |
| Malta                    | (-2.67–23.2) |
|                          | 14.6         |
| Netherlands              | (8.94–19.9)  |
|                          | 6.86         |
| Norway                   | (-5.99–14.1) |
|                          | 24.2         |
| Portugal                 | (15.4–30.2)  |
|                          | 17.5         |
| Spain                    | (4.15–25.2)  |
|                          | 5.73         |
| Sweden                   | (-3.14–11.0) |



|                                     |              |
|-------------------------------------|--------------|
|                                     | 3.59         |
| Switzerland                         | (-7.91-11.6) |
|                                     | 16.7         |
| United Kingdom                      | (9.44-22.2)  |
|                                     | 74.6         |
| Bolivia (Plurinational State of)    | (49.5-96.3)  |
|                                     | 38.7         |
| Ecuador                             | (28.2-51.0)  |
|                                     | 29.9         |
| Peru                                | (10.1-42.1)  |
|                                     | 20.8         |
| Antigua and Barbuda                 | (14.9-27.1)  |
|                                     | 19.5         |
| Bahamas                             | (8.20-29.4)  |
|                                     | 24.5         |
| Barbados                            | (17.5-32.9)  |
|                                     | 26.3         |
| Belize                              | (18.9-35.8)  |
|                                     | 29.7         |
| Bermuda                             | (-4.15-78.1) |
|                                     | 14.9         |
| Cuba                                | (8.78-21.1)  |
|                                     | 13.3         |
| Dominica                            | (6.74-19.7)  |
|                                     | 18.8         |
| Dominican Republic                  | (10.6-28.1)  |
|                                     | 39.1         |
| Grenada                             | (31.3-48.4)  |
|                                     | 43.3         |
| Guyana                              | (31.9-54.5)  |
|                                     | 242          |
| Haiti                               | (131-369)    |
|                                     | 13.4         |
| Jamaica                             | (5.87-20.7)  |
|                                     | -9.66        |
| Puerto Rico                         | (-17.3-11.0) |
|                                     | 39.2         |
| Saint Lucia                         | (32.4-46.5)  |
| Saint Vincent and the<br>Grenadines | 18.5         |
|                                     | (11.7-25.5)  |
|                                     | 27.8         |
| Suriname                            | (19.9-35.9)  |
|                                     | 32.0         |
| Trinidad and Tobago                 | (20.1-43.1)  |
|                                     | -5.89        |
| United States Virgin Islands        | (-24.7-14.5) |
|                                     | 45.4         |
| Colombia                            | (38.3-54.1)  |
|                                     | 19.1         |
| Costa Rica                          | (9.38-28.8)  |
|                                     | 93.3         |
| El Salvador                         | (40.5-209)   |
|                                     | 79.7         |
| Guatemala                           | (53.7-229)   |
|                                     | 139          |
| Honduras                            | (25.1-188)   |
|                                     | 41.0         |
| Mexico                              | (30.5-52.0)  |
|                                     | 81.0         |
| Nicaragua                           | (39.6-195)   |
|                                     | 23.7         |
| Panama                              | (16.7-30.7)  |

|                                                   |                                            |
|---------------------------------------------------|--------------------------------------------|
| Venezuela (Bolivarian<br>Republic of)             | 29·4<br>(18·3–40·4)                        |
| Brazil                                            | 27·4<br>(-3·08–42·3)                       |
| Paraguay                                          | 23·2<br>(11·8–34·0)                        |
| Afghanistan                                       | 315<br>(17·3–737)                          |
| Algeria                                           | 53·7<br>(28·7–68·4)                        |
| Bahrain                                           | 81·2<br>(62·2–133)                         |
| Egypt                                             | 32·4<br>(0·445–51·5)                       |
| Iran (Islamic Republic of)                        | 67·8<br>(51·8–81·9)                        |
| Iraq                                              | 91·3<br>(69·3–119)                         |
| Jordan                                            | 47·1<br>(39·0–55·9)                        |
| Kuwait                                            | 12·4<br>(-8·85–30·1)                       |
| Lebanon                                           | 39·8<br>(27·4–54·2)                        |
| Libya                                             | 34·4<br>(8·94–77·5)                        |
| Morocco                                           | 94·8<br>(73·6–118)                         |
| Oman                                              | 43·8<br>(12·2–73·3)                        |
| Palestine                                         | 47·2<br>(34·9–61·1)                        |
| Qatar                                             | 36·1<br>(6·64–69·0)                        |
| Saudi Arabia                                      | 5·99<br>(-4·60–31·8)                       |
| Sudan                                             | 209<br>(154–274)                           |
| Syrian Arab Republic                              | 61·4<br>(38·8–81·4)                        |
| Tunisia                                           | 42·9<br>(25·8–55·9)                        |
| Turkey                                            | 49·4<br>(13·2–66·9)                        |
| United Arab Emirates                              | 13·9<br>(-16·0–37·1)                       |
| Yemen                                             | 371<br>(186–709)                           |
| Bangladesh                                        | 176<br>(120–402)                           |
| Bhutan                                            | 205<br>(170–251)                           |
| India                                             | 178<br>(126–368)                           |
| Nepal                                             | 382<br>(254–763)                           |
| Pakistan                                          | 72·6<br>(49·0–98·0)                        |
| China<br>Democratic People's Republic<br>of Korea | 59·3<br>(52·2–67·5)<br>30·2<br>(15·6–47·4) |

|                                     |              |
|-------------------------------------|--------------|
|                                     | 15.1         |
| Taiwan (Province of China)          | (-10.3–32.6) |
|                                     | 1.09         |
| American Samoa                      | (-15.9–11.9) |
|                                     | 13.3         |
| Fiji                                | (-21.5–46.6) |
|                                     | -27.9        |
| Guam                                | (-32.8–20.2) |
|                                     | 53.1         |
| Kiribati                            | (24.8–159)   |
|                                     | 32.0         |
| Marshall Islands                    | (14.9–82.0)  |
| Micronesia (Federated States<br>of) | 66.9         |
|                                     | (12.6–141)   |
|                                     | 5.65         |
| Northern Mariana Islands            | (-20.9–25.1) |
|                                     | 97.1         |
| Papua New Guinea                    | (60.9–161)   |
|                                     | 14.5         |
| Samoa                               | (2.60–28.6)  |
|                                     | 150          |
| Solomon Islands                     | (51.0–349)   |
|                                     | 14.1         |
| Tonga                               | (1.50–26.0)  |
|                                     | 60.9         |
| Vanuatu                             | (-11.3–136)  |
|                                     | 176          |
| Cambodia                            | (136–238)    |
|                                     | 68.0         |
| Indonesia                           | (52.7–90.2)  |
| Lao People's Democratic<br>Republic | 628          |
|                                     | (324–1290)   |
|                                     | 36.7         |
| Malaysia                            | (15.8–50.7)  |
|                                     | 280          |
| Maldives                            | (231–408)    |
|                                     | 47.1         |
| Mauritius                           | (34.7–59.8)  |
|                                     | 250          |
| Myanmar                             | (124–448)    |
|                                     | 2.04         |
| Philippines                         | (-8.50–11.6) |
|                                     | 29.9         |
| Seychelles                          | (23.0–37.9)  |
|                                     | 76.9         |
| Sri Lanka                           | (54.9–108)   |
|                                     | 42.2         |
| Thailand                            | (33.1–52.5)  |
|                                     | 554          |
| Timor-Leste                         | (307–1040)   |
|                                     | 66.4         |
| Viet Nam                            | (46.3–95.8)  |
|                                     | 459          |
| Angola                              | (238–619)    |
|                                     | 187          |
| Central African Republic            | (29.8–394)   |
|                                     | 94.6         |
| Congo                               | (59.9–144)   |
| Democratic Republic of the<br>Congo | 104          |
|                                     | (33.2–242)   |
|                                     | 481          |
| Equatorial Guinea                   | (303–777)    |

|                             |               |
|-----------------------------|---------------|
|                             | 62.6          |
| Gabon                       | (42.0–92.0)   |
|                             | 445           |
| Burundi                     | (240–851)     |
|                             | 240           |
| Comoros                     | (153–491)     |
|                             | 270           |
| Djibouti                    | (144–571)     |
|                             | 1120          |
| Eritrea                     | (531–1910)    |
|                             | 646           |
| Ethiopia                    | (383–765)     |
|                             | 42.3          |
| Kenya                       | (31.8–54.6)   |
|                             | 73.7          |
| Madagascar                  | (41.4–122)    |
|                             | 100           |
| Malawi                      | (37.1–235)    |
|                             | 483           |
| Mozambique                  | (343–582)     |
|                             | 267           |
| Rwanda                      | (174–348)     |
|                             | 306           |
| Somalia                     | (104–626)     |
|                             | 309           |
| South Sudan                 | (106–622)     |
|                             | 84.0          |
| Uganda                      | (40.3–218)    |
|                             | 66.2          |
| United Republic of Tanzania | (41.4–87.6)   |
|                             | 52.3          |
| Zambia                      | (16.6–144)    |
|                             | 66.4          |
| Botswana                    | (47.4–90.4)   |
|                             | 62.3          |
| Eswatini                    | (14.9–168)    |
|                             | 179           |
| Lesotho                     | (69.6–275)    |
|                             | 83.1          |
| Namibia                     | (51.9–229)    |
|                             | 24.4          |
| South Africa                | (-0.224–39.8) |
|                             | 14.9          |
| Zimbabwe                    | (-2.95–93.1)  |
|                             | 105           |
| Benin                       | (85.1–125)    |
|                             | 147           |
| Burkina Faso                | (75.1–283)    |
|                             | 109           |
| Cabo Verde                  | (84.6–147)    |
|                             | 57.9          |
| Cameroon                    | (42.1–75.6)   |
|                             | 451           |
| Chad                        | (212–577)     |
|                             | 87.4          |
| Côte d'Ivoire               | (62.7–120)    |
|                             | 107           |
| Gambia                      | (73.9–158)    |
|                             | 38.9          |
| Ghana                       | (26.4–52.3)   |
|                             | 303           |
| Guinea                      | (201–550)     |

|                       |             |
|-----------------------|-------------|
|                       | 354         |
| Guinea-Bissau         | (168–684)   |
|                       | 145         |
| Liberia               | (87·5–289)  |
|                       | 418         |
| Mali                  | (179–695)   |
|                       | 114         |
| Mauritania            | (77·8–257)  |
|                       | 232         |
| Niger                 | (93·5–387)  |
|                       | 59·8        |
| Nigeria               | (34·9–90·2) |
|                       | 59·6        |
| Sao Tome and Principe | (39·1–179)  |
|                       | 129         |
| Senegal               | (103–154)   |
|                       | 123         |
| Sierra Leone          | (84·4–169)  |
|                       | 71·8        |
| Togo                  | (47·9–113)  |



Supplementary table 5. Fatty Liver Disease-SDG score including Urban Green Space for 60 countries and territories for 2017

| Super region name                                | Region name               | Country name             | Short name | Fatty Liver Disease-SDG Score (95% UI) |
|--------------------------------------------------|---------------------------|--------------------------|------------|----------------------------------------|
| Central Europe, Eastern Europe, and Central Asia | Central Asia              | Kazakhstan               | KAZ        | 64.8<br>(60.4–67.8)                    |
| Central Europe, Eastern Europe, and Central Asia | Central Europe            | Albania                  | ALB        | 63.7<br>(52.0–70.6)                    |
| Central Europe, Eastern Europe, and Central Asia | Central Europe            | Bulgaria                 | BGR        | 66.7<br>(52.4–72.4)                    |
| Central Europe, Eastern Europe, and Central Asia | Central Europe            | Croatia                  | HRV        | 77.2<br>(61.2–83.8)                    |
| Central Europe, Eastern Europe, and Central Asia | Central Europe            | Czechia                  | CZE        | 79.2<br>(66.7–84.2)                    |
| Central Europe, Eastern Europe, and Central Asia | Central Europe            | Hungary                  | HUN        | 71.2<br>(60.2–75.8)                    |
| Central Europe, Eastern Europe, and Central Asia | Central Europe            | Montenegro               | MNE        | 62.2<br>(55.6–72.0)                    |
| Central Europe, Eastern Europe, and Central Asia | Central Europe            | Poland                   | POL        | 78.3<br>(73.9–81.3)                    |
| Central Europe, Eastern Europe, and Central Asia | Central Europe            | Romania                  | ROU        | 66.5<br>(57.7–70.6)                    |
| Central Europe, Eastern Europe, and Central Asia | Central Europe            | Serbia                   | SRB        | 73.2<br>(70.4–75.7)                    |
| Central Europe, Eastern Europe, and Central Asia | Central Europe            | Slovakia                 | SVK        | 76.8<br>(60.2–82.3)                    |
| Central Europe, Eastern Europe, and Central Asia | Central Europe            | Slovenia                 | SVN        | 77.9<br>(65.2–88.6)                    |
| Central Europe, Eastern Europe, and Central Asia | Eastern Europe            | Belarus                  | BLR        | 73.8<br>(70.8–76.1)                    |
| Central Europe, Eastern Europe, and Central Asia | Eastern Europe            | Estonia                  | EST        | 80.8<br>(72.2–85.5)                    |
| Central Europe, Eastern Europe, and Central Asia | Eastern Europe            | Latvia                   | LVA        | 78.3<br>(74.5–81.5)                    |
| Central Europe, Eastern Europe, and Central Asia | Eastern Europe            | Lithuania                | LTU        | 81.2<br>(78.0–83.8)                    |
| Central Europe, Eastern Europe, and Central Asia | Eastern Europe            | Russian Federation       | RUS        | 69.5<br>(64.6–72.4)                    |
| High-income                                      | Australasia               | Australia                | AUS        | 87.2<br>(83.0–90.0)                    |
| High-income                                      | Australasia               | New Zealand              | NZL        | 82.7<br>(67.1–90.5)                    |
| High-income                                      | High-income Asia Pacific  | Japan                    | JPN        | 80.4<br>(79.0–81.6)                    |
| High-income                                      | High-income Asia Pacific  | Republic of Korea        | KOR        | 72.2<br>(65.5–75.5)                    |
| High-income                                      | High-income Asia Pacific  | Singapore                | SGP        | 75.8<br>(72.8–77.8)                    |
| High-income                                      | High-income North America | Canada                   | CAN        | 88.1<br>(81.7–92.0)                    |
| High-income                                      | High-income North America | United States of America | USA        | 86.3<br>(83.2–88.5)                    |
| High-income                                      | Southern Latin America    | Argentina                | ARG        | 70.3<br>(68.1–72.5)                    |
| High-income                                      | Southern Latin America    | Chile                    | CHL        | 70.1<br>(66.7–72.7)                    |
| High-income                                      | Southern Latin America    | Uruguay                  | URY        | 66.9<br>(61.1–70.7)                    |
| High-income                                      | Western Europe            | Austria                  | AUT        | 81.9<br>(73.4–86.3)                    |
| High-income                                      | Western Europe            | Belgium                  | BEL        | 82.5<br>(75.8–86.2)                    |
| High-income                                      | Western Europe            | Denmark                  | DNK        | 79.3<br>(65.9–84.8)                    |
| High-income                                      | Western Europe            | Finland                  | FIN        | 92.7<br>(88.5–95.4)                    |

|                                        |                              |                            |     |             |
|----------------------------------------|------------------------------|----------------------------|-----|-------------|
|                                        |                              |                            |     | 82.6        |
| High-income                            | Western Europe               | France                     | FRA | (77.5–85.5) |
|                                        |                              |                            |     | 86.0        |
| High-income                            | Western Europe               | Germany                    | DEU | (79.4–90.3) |
|                                        |                              |                            |     | 72.3        |
| High-income                            | Western Europe               | Greece                     | GRC | (62.1–76.6) |
|                                        |                              |                            |     | 82.2        |
| High-income                            | Western Europe               | Iceland                    | ISL | (68.1–91.9) |
|                                        |                              |                            |     | 82.5        |
| High-income                            | Western Europe               | Ireland                    | IRL | (72.6–87.5) |
|                                        |                              |                            |     | 72.8        |
| High-income                            | Western Europe               | Israel                     | ISR | (69.1–75.2) |
|                                        |                              |                            |     | 81.8        |
| High-income                            | Western Europe               | Italy                      | ITA | (64.8–88.4) |
|                                        |                              |                            |     | 74.5        |
| High-income                            | Western Europe               | Luxembourg                 | LUX | (63.9–85.6) |
|                                        |                              |                            |     | 73.1        |
| High-income                            | Western Europe               | Malta                      | MLT | (64.0–77.4) |
|                                        |                              |                            |     | 88.2        |
| High-income                            | Western Europe               | Netherlands                | NLD | (84.4–90.9) |
|                                        |                              |                            |     | 87.6        |
| High-income                            | Western Europe               | Norway                     | NOR | (78.3–92.2) |
|                                        |                              |                            |     | 82.6        |
| High-income                            | Western Europe               | Portugal                   | PRT | (77.6–85.7) |
|                                        |                              |                            |     | 79.5        |
| High-income                            | Western Europe               | Spain                      | ESP | (71.9–83.5) |
|                                        |                              |                            |     | 90.1        |
| High-income                            | Western Europe               | Sweden                     | SWE | (84.4–93.4) |
|                                        |                              |                            |     | 88.3        |
| High-income                            | Western Europe               | Switzerland                | CHE | (79.5–92.4) |
|                                        |                              |                            |     | 84.4        |
| High-income                            | Western Europe               | United Kingdom             | GBR | (80.1–87.0) |
|                                        |                              |                            |     | 65.9        |
| Latin America and Caribbean            | Caribbean                    | Trinidad and Tobago        | TTO | (61.4–70.2) |
|                                        |                              |                            |     | 70.8        |
| Latin America and Caribbean            | Central Latin America        | Costa Rica                 | CRI | (66.3–74.1) |
|                                        |                              |                            |     | 76.0        |
| Latin America and Caribbean            | Central Latin America        | Panama                     | PAN | (73.0–78.5) |
|                                        |                              |                            |     | 36.9        |
| North Africa and Middle East           | North Africa and Middle East | Bahrain                    | BHR | (34.9–38.2) |
|                                        |                              |                            |     | 60.5        |
| North Africa and Middle East           | North Africa and Middle East | Iran (Islamic Republic of) | IRN | (56.5–63.0) |
|                                        |                              |                            |     | 42.2        |
| North Africa and Middle East           | North Africa and Middle East | Kuwait                     | KWT | (41.7–43.6) |
|                                        |                              |                            |     | 45.4        |
| North Africa and Middle East           | North Africa and Middle East | Oman                       | OMN | (37.6–52.0) |
|                                        |                              |                            |     | 29.0        |
| North Africa and Middle East           | North Africa and Middle East | Qatar                      | QAT | (27.9–34.3) |
|                                        |                              |                            |     | 41.4        |
| North Africa and Middle East           | North Africa and Middle East | Saudi Arabia               | SAU | (39.3–50.0) |
|                                        |                              |                            |     | 59.0        |
| North Africa and Middle East           | North Africa and Middle East | Turkey                     | TUR | (46.6–63.5) |
|                                        |                              |                            |     | 44.6        |
| North Africa and Middle East           | North Africa and Middle East | United Arab Emirates       | ARE | (35.5–50.8) |
|                                        |                              |                            |     | 60.2        |
| Southeast Asia, East Asia, and Oceania | Southeast Asia               | Malaysia                   | MYS | (53.2–64.2) |
|                                        |                              |                            |     | 60.6        |
| Southeast Asia, East Asia, and Oceania | Southeast Asia               | Mauritius                  | MUS | (57.0–63.4) |

Supplementary table 6. Fatty Liver Disease-SDG score rank and NAFLD Preparedness index rank for 100 countries

| Super region name                                | Region name               | Country name             | Short name | 2017 Fatty Liver Disease-SDG rank | Policy index rank | Combined rank score |
|--------------------------------------------------|---------------------------|--------------------------|------------|-----------------------------------|-------------------|---------------------|
| High-income                                      | High-income Asia Pacific  | Japan                    | JPN        | 1                                 | 24                | 25                  |
| High-income                                      | Western Europe            | Finland                  | FIN        | 2                                 | 40                | 42                  |
| High-income                                      | Western Europe            | Netherlands              | NLD        | 3                                 | 57                | 60                  |
| High-income                                      | Western Europe            | Sweden                   | SWE        | 4                                 | 3                 | 7                   |
| High-income                                      | Western Europe            | France                   | FRA        | 5                                 | 52                | 57                  |
| High-income                                      | High-income Asia Pacific  | Singapore                | SGP        | 6                                 | 32                | 38                  |
| High-income                                      | Australasia               | Australia                | AUS        | 7                                 | 28                | 35                  |
| High-income                                      | Western Europe            | Switzerland              | CHE        | 8                                 | 47                | 55                  |
| High-income                                      | High-income North America | Canada                   | CAN        | 9                                 | 17                | 26                  |
| High-income                                      | Western Europe            | Israel                   | ISR        | 10                                | 14                | 24                  |
| High-income                                      | Western Europe            | Belgium                  | BEL        | 11                                | 6                 | 17                  |
| High-income                                      | Western Europe            | Norway                   | NOR        | 12                                | 32                | 44                  |
| High-income                                      | Western Europe            | Cyprus                   | CYP        | 12                                | 71                | 83                  |
| High-income                                      | Western Europe            | United Kingdom           | GBR        | 13                                | 2                 | 15                  |
| High-income                                      | Western Europe            | Germany                  | DEU        | 14                                | 5                 | 19                  |
| High-income                                      | High-income Asia Pacific  | Republic of Korea        | KOR        | 15                                | 18                | 33                  |
| High-income                                      | Western Europe            | Austria                  | AUT        | 16                                | 35                | 51                  |
| High-income                                      | High-income North America | United States of America | USA        | 17                                | 8                 | 25                  |
| High-income                                      | Western Europe            | Ireland                  | IRL        | 18                                | 71                | 89                  |
| High-income                                      | Western Europe            | Denmark                  | DNK        | 19                                | 24                | 43                  |
| High-income                                      | Western Europe            | Portugal                 | PRT        | 20                                | 57                | 77                  |
| High-income                                      | Western Europe            | Spain                    | ESP        | 21                                | 9                 | 30                  |
| High-income                                      | Australasia               | New Zealand              | NZL        | 22                                | 71                | 93                  |
| High-income                                      | Western Europe            | Italy                    | ITA        | 23                                | 40                | 63                  |
| High-income                                      | Western Europe            | Greece                   | GRC        | 24                                | 71                | 95                  |
| High-income                                      | Western Europe            | Iceland                  | ISL        | 25                                | 71                | 96                  |
| Central Europe, Eastern Europe, and Central Asia | Eastern Europe            | Estonia                  | EST        | 26                                | 71                | 97                  |
| Central Europe, Eastern Europe, and Central Asia | Central Europe            | Czechia                  | CZE        | 27                                | 6                 | 33                  |
| Central Europe, Eastern Europe, and Central Asia | Eastern Europe            | Lithuania                | LTU        | 28                                | 55                | 83                  |
| Latin America and Caribbean                      | Central Latin America     | Colombia                 | COL        | 29                                | 19                | 48                  |



|                                                  |                              |                        |     |    |    |     |
|--------------------------------------------------|------------------------------|------------------------|-----|----|----|-----|
| Central Europe, Eastern Europe, and Central Asia | Central Europe               | Poland                 | POL | 29 | 40 | 69  |
| Southeast Asia, East Asia, and Oceania           | East Asia                    | China                  | CHN | 30 | 15 | 45  |
| High-income                                      | Southern Latin America       | Argentina              | ARG | 31 | 40 | 71  |
| Central Europe, Eastern Europe, and Central Asia | Eastern Europe               | Latvia                 | LVA | 32 | 57 | 89  |
| North Africa and Middle East                     | North Africa and Middle East | Bahrain                | BHR | 33 | 71 | 104 |
| Central Europe, Eastern Europe, and Central Asia | Central Europe               | Slovenia               | SVN | 34 | 57 | 91  |
| High-income                                      | Western Europe               | Luxembourg             | LUX | 35 | 57 | 92  |
| Central Europe, Eastern Europe, and Central Asia | Central Europe               | Croatia                | HRV | 36 | 45 | 81  |
| Central Europe, Eastern Europe, and Central Asia | Central Europe               | Slovakia               | SVK | 37 | 22 | 59  |
| Central Europe, Eastern Europe, and Central Asia | Eastern Europe               | Republic of Moldova    | MDA | 38 | 11 | 49  |
| Latin America and Caribbean                      | Central Latin America        | Costa Rica             | CRI | 38 | 71 | 109 |
| North Africa and Middle East                     | North Africa and Middle East | Lebanon                | LBN | 39 | 12 | 51  |
|                                                  |                              | Taiwan (Province of    |     |    |    |     |
| Southeast Asia, East Asia, and Oceania           | East Asia                    | China)                 | TWN | 40 | 47 | 87  |
| Latin America and Caribbean                      | Andean Latin America         | Ecuador                | ECU | 40 | 57 | 97  |
| Latin America and Caribbean                      | Andean Latin America         | Peru                   | PER | 41 | 71 | 112 |
| Latin America and Caribbean                      | Caribbean                    | Bahamas                | BHS | 42 | 71 | 113 |
| Central Europe, Eastern Europe, and Central Asia | Central Europe               | Serbia                 | SRB | 43 | 71 | 114 |
| Southeast Asia, East Asia, and Oceania           | Southeast Asia               | Thailand               | THA | 44 | 45 | 89  |
| Central Europe, Eastern Europe, and Central Asia | Central Asia                 | Kyrgyzstan             | KGZ | 45 | 71 | 116 |
| Central Europe, Eastern Europe, and Central Asia | Central Europe               | North Macedonia        | MKD | 46 | 37 | 83  |
| Central Europe, Eastern Europe, and Central Asia | Central Europe               | Hungary                | HUN | 47 | 52 | 99  |
| North Africa and Middle East                     | North Africa and Middle East | Tunisia                | TUN | 48 | 71 | 119 |
| Latin America and Caribbean                      | Central Latin America        | Mexico                 | MEX | 49 | 13 | 62  |
| Central Europe, Eastern Europe, and Central Asia | Eastern Europe               | Ukraine                | UKR | 50 | 24 | 74  |
| Central Europe, Eastern Europe, and Central Asia | Central Europe               | Romania                | ROU | 51 | 40 | 91  |
|                                                  |                              | Iran (Islamic Republic |     |    |    |     |
| North Africa and Middle East                     | North Africa and Middle East | of)                    | IRN | 52 | 29 | 81  |
| Southeast Asia, East Asia, and Oceania           | Southeast Asia               | Sri Lanka              | LKA | 53 | 37 | 90  |
| Central Europe, Eastern Europe, and Central Asia | Central Asia                 | Kazakhstan             | KAZ | 54 | 24 | 78  |
| Central Europe, Eastern Europe, and Central Asia | Central Europe               | Bulgaria               | BGR | 55 | 4  | 59  |
| Latin America and Caribbean                      | Caribbean                    | Dominican Republic     | DOM | 55 | 71 | 126 |
| North Africa and Middle East                     | North Africa and Middle East | Turkey                 | TUR | 57 | 47 | 104 |
| North Africa and Middle East                     | North Africa and Middle East | Algeria                | DZA | 58 | 71 | 129 |

|                                                  |                              |                                  |     |    |    |     |
|--------------------------------------------------|------------------------------|----------------------------------|-----|----|----|-----|
| Latin America and Caribbean                      | Andean Latin America         | Bolivia (Plurinational State of) | BOL | 59 | 15 | 74  |
| Southeast Asia, East Asia, and Oceania           | Southeast Asia               | Malaysia                         | MYS | 60 | 30 | 90  |
| Latin America and Caribbean                      | Tropical Latin America       | Brazil                           | BRA | 61 | 10 | 71  |
| Central Europe, Eastern Europe, and Central Asia | Central Asia                 | Armenia                          | ARM | 62 | 71 | 133 |
| North Africa and Middle East                     | North Africa and Middle East | Libya                            | LBY | 63 | 71 | 134 |
| Sub-Saharan Africa                               | Southern Sub-Saharan Africa  | Botswana                         | BWA | 63 | 71 | 134 |
| Latin America and Caribbean                      | Caribbean                    | Puerto Rico                      | PRI | 65 | 22 | 87  |
| North Africa and Middle East                     | North Africa and Middle East | Oman                             | OMN | 66 | 57 | 123 |
| Sub-Saharan Africa                               | Western Sub-Saharan Africa   | Cabo Verde                       | CPV | 67 | 51 | 118 |
| Central Europe, Eastern Europe, and Central Asia | Central Asia                 | Tajikistan                       | TJK | 68 | 71 | 139 |
| Central Europe, Eastern Europe, and Central Asia | Central Asia                 | Uzbekistan                       | UZB | 69 | 57 | 126 |
| North Africa and Middle East                     | North Africa and Middle East | Kuwait                           | KWT | 70 | 54 | 124 |
| Sub-Saharan Africa                               | Western Sub-Saharan Africa   | Ghana                            | GHA | 71 | 57 | 128 |
| North Africa and Middle East                     | North Africa and Middle East | Qatar                            | QAT | 72 | 32 | 104 |
| Sub-Saharan Africa                               | Southern Sub-Saharan Africa  | South Africa                     | ZAF | 73 | 71 | 144 |
| Sub-Saharan Africa                               | Eastern Sub-Saharan Africa   | Kenya                            | KEN | 74 | 71 | 145 |
| Central Europe, Eastern Europe, and Central Asia | Central Asia                 | Georgia                          | GEO | 75 | 20 | 95  |
| Central Europe, Eastern Europe, and Central Asia | Central Asia                 | Mongolia                         | MNG | 76 | 55 | 131 |
| North Africa and Middle East                     | North Africa and Middle East | United Arab Emirates             | ARE | 76 | 71 | 147 |
| Southeast Asia, East Asia, and Oceania           | Southeast Asia               | Indonesia                        | IDN | 78 | 71 | 149 |
| Central Europe, Eastern Europe, and Central Asia | Central Asia                 | Azerbaijan                       | AZE | 79 | 37 | 116 |
| North Africa and Middle East                     | North Africa and Middle East | Saudi Arabia                     | SAU | 80 | 20 | 100 |
| North Africa and Middle East                     | North Africa and Middle East | Morocco                          | MAR | 81 | 71 | 152 |
| South Asia                                       | South Asia                   | Nepal                            | NPL | 82 | 31 | 113 |
| Sub-Saharan Africa                               | Western Sub-Saharan Africa   | Nigeria                          | NGA | 83 | 71 | 154 |
| North Africa and Middle East                     | North Africa and Middle East | Egypt                            | EGY | 84 | 47 | 131 |
| South Asia                                       | South Asia                   | Bangladesh                       | BGD | 85 | 57 | 142 |
| North Africa and Middle East                     | North Africa and Middle East | Sudan                            | SDN | 86 | 71 | 157 |
| Sub-Saharan Africa                               | Eastern Sub-Saharan Africa   | Malawi                           | MWI | 87 | 57 | 144 |
| South Asia                                       | South Asia                   | India                            | IND | 88 | 1  | 89  |
| South Asia                                       | South Asia                   | Pakistan                         | PAK | 89 | 71 | 160 |
| Sub-Saharan Africa                               | Eastern Sub-Saharan Africa   | Zambia                           | ZMB | 90 | 57 | 147 |
| Sub-Saharan Africa                               | Central Sub-Saharan Africa   | Democratic Republic of the Congo | COD | 91 | 71 | 162 |

|                    |                            |                          |     |    |    |     |
|--------------------|----------------------------|--------------------------|-----|----|----|-----|
| Sub-Saharan Africa | Eastern Sub-Saharan Africa | Ethiopia                 | ETH | 92 | 71 | 163 |
| Sub-Saharan Africa | Western Sub-Saharan Africa | Burkina Faso             | BFA | 93 | 71 | 164 |
| Sub-Saharan Africa | Eastern Sub-Saharan Africa | Uganda                   | UGA | 94 | 71 | 165 |
| Sub-Saharan Africa | Central Sub-Saharan Africa | Central African Republic | CAF | 95 | 71 | 166 |
| Sub-Saharan Africa | Western Sub-Saharan Africa | Benin                    | BEN | 96 | 57 | 153 |

Supplementary table 7. Fatty Liver Disease-SDG score and NAFLD Preparedness index

| Super region name                                | Country name        | Short name | Fatty Liver Disease-SDG score | NAFLD preparedness index |
|--------------------------------------------------|---------------------|------------|-------------------------------|--------------------------|
| Central Europe, Eastern Europe, and Central Asia | Armenia             | ARM        | 61.48                         | 0                        |
| Central Europe, Eastern Europe, and Central Asia | Azerbaijan          | AZE        | 52.30                         | 8.29                     |
| Central Europe, Eastern Europe, and Central Asia | Bulgaria            | BGR        | 64.26                         | 32.92                    |
| Central Europe, Eastern Europe, and Central Asia | Croatia             | HRV        | 74.23                         | 7.55                     |
| Central Europe, Eastern Europe, and Central Asia | Czechia             | CZE        | 78.69                         | 28.69                    |
| Central Europe, Eastern Europe, and Central Asia | Estonia             | EST        | 78.80                         | 0                        |
| Central Europe, Eastern Europe, and Central Asia | Georgia             | GEO        | 55.93                         | 13.98                    |
| Central Europe, Eastern Europe, and Central Asia | Hungary             | HUN        | 69.17                         | 6.21                     |
| Central Europe, Eastern Europe, and Central Asia | Kazakhstan          | KAZ        | 65.00                         | 13.48                    |
| Central Europe, Eastern Europe, and Central Asia | Kyrgyzstan          | KGZ        | 69.64                         | 0                        |
| Central Europe, Eastern Europe, and Central Asia | Latvia              | LVA        | 76.29                         | 0.5                      |
| Central Europe, Eastern Europe, and Central Asia | Lithuania           | LTU        | 77.95                         | 5.71                     |
| Central Europe, Eastern Europe, and Central Asia | Mongolia            | MNG        | 53.98                         | 5.71                     |
| Central Europe, Eastern Europe, and Central Asia | North Macedonia     | MKD        | 69.26                         | 8.29                     |
| Central Europe, Eastern Europe, and Central Asia | Poland              | POL        | 77.04                         | 7.77                     |
| Central Europe, Eastern Europe, and Central Asia | Republic of Moldova | MDA        | 73.02                         | 23.5                     |
| Central Europe, Eastern Europe, and Central Asia | Romania             | ROU        | 68.11                         | 7.77                     |
| Central Europe, Eastern Europe, and Central Asia | Serbia              | SRB        | 70.85                         | 0                        |
| Central Europe, Eastern Europe, and Central Asia | Slovakia            | SVK        | 74.03                         | 13.67                    |
| Central Europe, Eastern Europe, and Central Asia | Slovenia            | SVN        | 74.79                         | 0.5                      |
| Central Europe, Eastern Europe, and Central Asia | Tajikistan          | TJK        | 58.34                         | 0                        |
| Central Europe, Eastern Europe, and Central Asia | Ukraine             | UKR        | 68.25                         | 13.48                    |
| Central Europe, Eastern Europe, and Central Asia | Uzbekistan          | UZB        | 58.00                         | 0.5                      |
| High-income                                      | Argentina           | ARG        | 76.78                         | 7.77                     |
| High-income                                      | Australia           | AUS        | 88.65                         | 13.19                    |
| High-income                                      | Austria             | AUT        | 85.75                         | 11.59                    |
| High-income                                      | Belgium             | BEL        | 87.88                         | 28.69                    |
| High-income                                      | Canada              | CAN        | 88.29                         | 18.25                    |
| High-income                                      | Cyprus              | CYP        | 87.69                         | 0                        |
| High-income                                      | Denmark             | DNK        | 83.99                         | 13.48                    |
| High-income                                      | Finland             | FIN        | 91.27                         | 7.77                     |
| High-income                                      | France              | FRA        | 89.45                         | 6.21                     |
| High-income                                      | Germany             | DEU        | 86.73                         | 32.05                    |
| High-income                                      | Greece              | GRC        | 79.84                         | 0                        |
| High-income                                      | Iceland             | ISL        | 79.10                         | 0                        |
| High-income                                      | Ireland             | IRL        | 84.87                         | 0                        |
| High-income                                      | Israel              | ISR        | 88.06                         | 19.44                    |
| High-income                                      | Italy               | ITA        | 79.87                         | 7.77                     |

|                                        |                                  |     |       |       |
|----------------------------------------|----------------------------------|-----|-------|-------|
| High-income                            | Japan                            | JPN | 93.48 | 13.48 |
| High-income                            | Luxembourg                       | LUX | 74.51 | 0.5   |
| High-income                            | Netherlands                      | NLD | 90.94 | 0.5   |
| High-income                            | New Zealand                      | NZL | 80.26 | 0     |
| High-income                            | Norway                           | NOR | 87.68 | 12.04 |
| High-income                            | Portugal                         | PRT | 82.90 | 0.5   |
| High-income                            | Republic of Korea                | KOR | 86.46 | 14.82 |
| High-income                            | Singapore                        | SGP | 89.15 | 12.04 |
| High-income                            | Spain                            | ESP | 82.44 | 26.67 |
| High-income                            | Sweden                           | SWE | 90.54 | 34.07 |
| High-income                            | Switzerland                      | CHE | 88.41 | 6.49  |
| High-income                            | United Kingdom                   | GBR | 87.64 | 39.97 |
| High-income                            | United States of America         | USA | 85.30 | 27.02 |
| Latin America and Caribbean            | Bahamas                          | BHS | 71.01 | 0     |
| Latin America and Caribbean            | Bolivia (Plurinational State of) | BOL | 62.02 | 19.36 |
| Latin America and Caribbean            | Brazil                           | BRA | 61.65 | 25.87 |
| Latin America and Caribbean            | Colombia                         | COL | 77.02 | 14.17 |
| Latin America and Caribbean            | Costa Rica                       | CRI | 73.04 | 0     |
| Latin America and Caribbean            | Dominican Republic               | DOM | 64.35 | 0     |
| Latin America and Caribbean            | Ecuador                          | ECU | 71.52 | 0.5   |
| Latin America and Caribbean            | Mexico                           | MEX | 68.51 | 20.16 |
| Latin America and Caribbean            | Peru                             | PER | 71.32 | 0     |
| Latin America and Caribbean            | Puerto Rico                      | PRI | 59.01 | 13.67 |
| North Africa and Middle East           | Algeria                          | DZA | 62.53 | 0     |
| North Africa and Middle East           | Bahrain                          | BHR | 75.91 | 0     |
| North Africa and Middle East           | Egypt                            | EGY | 48.64 | 6.49  |
| North Africa and Middle East           | Iran (Islamic Republic of)       | IRN | 67.70 | 12.7  |
| North Africa and Middle East           | Kuwait                           | KWT | 57.39 | 5.9   |
| North Africa and Middle East           | Lebanon                          | LBN | 71.92 | 20.9  |
| North Africa and Middle East           | Libya                            | LYB | 59.87 | 0     |
| North Africa and Middle East           | Morocco                          | MAR | 50.38 | 0     |
| North Africa and Middle East           | Oman                             | OMN | 58.65 | 0.5   |
| North Africa and Middle East           | Qatar                            | QAT | 56.80 | 12.04 |
| North Africa and Middle East           | Saudi Arabia                     | SAU | 52.22 | 13.98 |
| North Africa and Middle East           | Sudan                            | SDN | 46.64 | 0     |
| North Africa and Middle East           | Tunisia                          | TUN | 68.57 | 0     |
| North Africa and Middle East           | Türkiye                          | TUR | 62.60 | 6.49  |
| North Africa and Middle East           | United Arab Emirates             | ARE | 54.02 | 0     |
| South Asia                             | Bangladesh                       | BGD | 47.47 | 0.5   |
| South Asia                             | India                            | IND | 44.36 | 42.73 |
| South Asia                             | Nepal                            | NPL | 49.44 | 12.2  |
| South Asia                             | Pakistan                         | PAK | 40.61 | 0     |
| Southeast Asia, East Asia, and Oceania | China                            | CHN | 76.80 | 19.36 |
| Southeast Asia, East Asia, and Oceania | Indonesia                        | IDN | 52.67 | 0     |
| Southeast Asia, East Asia, and Oceania | Malaysia                         | MYS | 61.69 | 12.54 |
| Southeast Asia, East Asia, and Oceania | Sri Lanka                        | LKA | 67.33 | 8.29  |
| Southeast Asia, East Asia, and Oceania | Taiwan (Province of China)       | TWN | 71.49 | 6.49  |
| Southeast Asia, East Asia, and Oceania | Thailand                         | THA | 70.85 | 7.55  |
| Sub-Saharan Africa                     | Benin                            | BEN | 18.40 | 0.5   |
| Sub-Saharan Africa                     | Botswana                         | BWA | 59.94 | 0     |
| Sub-Saharan Africa                     | Burkina Faso                     | BFA | 28.80 | 0     |
| Sub-Saharan Africa                     | Cabo Verde                       | CPV | 58.45 | 6.4   |
| Sub-Saharan Africa                     | Central African Republic         | CAF | 20.30 | 0     |
| Sub-Saharan Africa                     | Democratic Republic of the Congo | COD | 37.25 | 0     |
| Sub-Saharan Africa                     | Ethiopia                         | ETH | 31.39 | 0     |
| Sub-Saharan Africa                     | Ghana                            | GHA | 57.08 | 0.5   |
| Sub-Saharan Africa                     | Kenya                            | KEN | 56.22 | 0     |
| Sub-Saharan Africa                     | Malawi                           | MWI | 46.12 | 0.5   |
| Sub-Saharan Africa                     | Nigeria                          | NGA | 48.98 | 0     |
| Sub-Saharan Africa                     | South Africa                     | ZAF | 56.56 | 0     |
| Sub-Saharan Africa                     | Uganda                           | UGA | 25.67 | 0     |
| Sub-Saharan Africa                     | Zambia                           | ZMB | 40.45 | 0.5   |

Supplementary table 8. Fatty Liver Disease-SDG score and HDI index

| Super region name                                | Country name           | Short name | Fatty Liver Disease-SDG score | HDI index |
|--------------------------------------------------|------------------------|------------|-------------------------------|-----------|
| Central Europe, Eastern Europe, and Central Asia | Albania                | ALB        | 63.72                         | 80.6      |
| Central Europe, Eastern Europe, and Central Asia | Armenia                | ARM        | 61.48                         | 77.1      |
| Central Europe, Eastern Europe, and Central Asia | Azerbaijan             | AZE        | 52.30                         | 75.7      |
| Central Europe, Eastern Europe, and Central Asia | Belarus                | BLR        | 75.60                         | 81.8      |
| Central Europe, Eastern Europe, and Central Asia | Bosnia and Herzegovina | BIH        | 65.50                         | 77.6      |
| Central Europe, Eastern Europe, and Central Asia | Bulgaria               | BGR        | 64.26                         | 80.9      |
| Central Europe, Eastern Europe, and Central Asia | Croatia                | HRV        | 74.23                         | 85.6      |
| Central Europe, Eastern Europe, and Central Asia | Czechia                | CZE        | 78.69                         | 89.4      |
| Central Europe, Eastern Europe, and Central Asia | Estonia                | EST        | 78.80                         | 89.1      |
| Central Europe, Eastern Europe, and Central Asia | Georgia                | GEO        | 55.93                         | 80.4      |
| Central Europe, Eastern Europe, and Central Asia | Hungary                | HUN        | 69.17                         | 84.9      |
| Central Europe, Eastern Europe, and Central Asia | Kazakhstan             | KAZ        | 65.00                         | 81.4      |
| Central Europe, Eastern Europe, and Central Asia | Kyrgyzstan             | KGZ        | 69.64                         | 69.8      |
| Central Europe, Eastern Europe, and Central Asia | Latvia                 | LVA        | 76.29                         | 86.6      |
| Central Europe, Eastern Europe, and Central Asia | Lithuania              | LTU        | 77.95                         | 88        |
| Central Europe, Eastern Europe, and Central Asia | Mongolia               | MNG        | 53.98                         | 74.3      |
| Central Europe, Eastern Europe, and Central Asia | Montenegro             | MNE        | 57.41                         | 83.4      |
| Central Europe, Eastern Europe, and Central Asia | North Macedonia        | MKD        | 69.26                         | 77.9      |
| Central Europe, Eastern Europe, and Central Asia | Poland                 | POL        | 77.04                         | 87.7      |
| Central Europe, Eastern Europe, and Central Asia | Republic of Moldova    | MDA        | 73.02                         | 76.8      |
| Central Europe, Eastern Europe, and Central Asia | Romania                | ROU        | 68.11                         | 82.7      |
| Central Europe, Eastern Europe, and Central Asia | Russian Federation     | RUS        | 70.36                         | 84.1      |
| Central Europe, Eastern Europe, and Central Asia | Serbia                 | SRB        | 70.85                         | 80.8      |
| Central Europe, Eastern Europe, and Central Asia | Slovakia               | SVK        | 74.03                         | 85.9      |
| Central Europe, Eastern Europe, and Central Asia | Slovenia               | SVN        | 74.79                         | 91.7      |
| Central Europe, Eastern Europe, and Central Asia | Tajikistan             | TJK        | 58.34                         | 67.1      |
| Central Europe, Eastern Europe, and Central Asia | Turkmenistan           | TKM        | 52.62                         | 74.6      |
| Central Europe, Eastern Europe, and Central Asia | Ukraine                | UKR        | 68.25                         | 78.3      |
| Central Europe, Eastern Europe, and Central Asia | Uzbekistan             | UZB        | 58.00                         | 72        |
| High-income                                      | Andorra                | AND        | 75.93                         | 87.2      |
| High-income                                      | Argentina              | ARG        | 76.78                         | 85        |
| High-income                                      | Australia              | AUS        | 88.65                         | 94.1      |
| High-income                                      | Austria                | AUT        | 85.75                         | 91.7      |
| High-income                                      | Belgium                | BEL        | 87.88                         | 93.3      |
| High-income                                      | Brunei Darussalam      | BRN        | 72.34                         | 83        |
| High-income                                      | Canada                 | CAN        | 88.29                         | 93.3      |
| High-income                                      | Chile                  | CHL        | 79.16                         | 85.6      |
| High-income                                      | Cyprus                 | CYP        | 87.69                         | 89.2      |
| High-income                                      | Denmark                | DNK        | 83.99                         | 94.2      |
| High-income                                      | Finland                | FIN        | 91.27                         | 93.6      |
| High-income                                      | France                 | FRA        | 89.45                         | 90.1      |
| High-income                                      | Germany                | DEU        | 86.73                         | 94.5      |
| High-income                                      | Greece                 | GRC        | 79.84                         | 88.6      |
| High-income                                      | Iceland                | ISL        | 79.10                         | 95.9      |
| High-income                                      | Ireland                | IRL        | 84.87                         | 93.7      |
| High-income                                      | Israel                 | ISR        | 88.06                         | 91.9      |
| High-income                                      | Italy                  | ITA        | 79.87                         | 89.3      |
| High-income                                      | Japan                  | JPN        | 93.48                         | 92.3      |

|                              |                                    |     |       |      |
|------------------------------|------------------------------------|-----|-------|------|
| High-income                  | Luxembourg                         | LUX | 74.51 | 92.2 |
| High-income                  | Malta                              | MLT | 81.96 | 91   |
| High-income                  | Netherlands                        | NLD | 90.94 | 93.9 |
| High-income                  | New Zealand                        | NZL | 80.26 | 93.6 |
| High-income                  | Norway                             | NOR | 87.68 | 96.2 |
| High-income                  | Portugal                           | PRT | 82.90 | 86   |
| High-income                  | Republic of Korea                  | KOR | 86.46 | 91.9 |
| High-income                  | Singapore                          | SGP | 89.15 | 94   |
| High-income                  | Spain                              | ESP | 82.44 | 90.1 |
| High-income                  | Sweden                             | SWE | 90.54 | 94.2 |
| High-income                  | Switzerland                        | CHE | 88.41 | 95.9 |
| High-income                  | United Kingdom                     | GBR | 87.64 | 92.9 |
| High-income                  | United States of America           | USA | 85.30 | 92.7 |
| High-income                  | Uruguay                            | URY | 67.01 | 81.9 |
| Latin America and Caribbean  | Antigua and Barbuda                | ATG | 76.26 | 79.8 |
| Latin America and Caribbean  | Bahamas                            | BHS | 71.01 | 82.7 |
| Latin America and Caribbean  | Barbados                           | BRB | 79.42 | 79.7 |
| Latin America and Caribbean  | Belize                             | BLZ | 65.79 | 70.6 |
| Latin America and Caribbean  | Bolivia (Plurinational State of)   | BOL | 62.02 | 71.4 |
| Latin America and Caribbean  | Brazil                             | BRA | 61.65 | 76.4 |
| Latin America and Caribbean  | Colombia                           | COL | 77.02 | 76.3 |
| Latin America and Caribbean  | Costa Rica                         | CRI | 73.04 | 81.1 |
| Latin America and Caribbean  | Cuba                               | CUB | 76.83 | 78.3 |
| Latin America and Caribbean  | Dominica                           | DMA | 71.21 | 72.6 |
| Latin America and Caribbean  | Dominican Republic                 | DOM | 64.35 | 76.4 |
| Latin America and Caribbean  | Ecuador                            | ECU | 71.52 | 76.2 |
| Latin America and Caribbean  | El Salvador                        | SLV | 65.96 | 68   |
| Latin America and Caribbean  | Grenada                            | GRD | 65.43 | 79.7 |
| Latin America and Caribbean  | Guatemala                          | GTM | 58.61 | 64   |
| Latin America and Caribbean  | Guyana                             | GUY | 56.16 | 70.1 |
| Latin America and Caribbean  | Haiti                              | HTI | 40.95 | 54.1 |
| Latin America and Caribbean  | Honduras                           | HND | 48.35 | 61.7 |
| Latin America and Caribbean  | Jamaica                            | JAM | 70.34 | 71.6 |
| Latin America and Caribbean  | Mexico                             | MEX | 68.51 | 77.7 |
| Latin America and Caribbean  | Nicaragua                          | NIC | 63.39 | 66.2 |
| Latin America and Caribbean  | Panama                             | PAN | 78.66 | 81.4 |
| Latin America and Caribbean  | Paraguay                           | PRY | 65.75 | 72.7 |
| Latin America and Caribbean  | Peru                               | PER | 71.32 | 77.6 |
| Latin America and Caribbean  | Saint Lucia                        | LCA | 70.36 | 74.6 |
| Latin America and Caribbean  | Saint Vincent and the Grenadines   | VCT | 59.93 | 77.5 |
| Latin America and Caribbean  | Suriname                           | SUR | 63.47 | 75.5 |
| Latin America and Caribbean  | Trinidad and Tobago                | TTO | 65.36 | 81.5 |
| Latin America and Caribbean  | Venezuela (Bolivarian Republic of) | VEN | 63.97 | 73.8 |
| North Africa and Middle East | Afghanistan                        | AFG | 18.23 | 48.3 |
| North Africa and Middle East | Algeria                            | DZA | 62.53 | 74.5 |
| North Africa and Middle East | Bahrain                            | BHR | 75.91 | 87.9 |
| North Africa and Middle East | Egypt                              | EGY | 48.64 | 72.9 |
| North Africa and Middle East | Iran (Islamic Republic of)         | IRN | 67.70 | 78.7 |
| North Africa and Middle East | Iraq                               | IRQ | 61.65 | 69.2 |
| North Africa and Middle East | Jordan                             | JOR | 81.84 | 72.3 |
| North Africa and Middle East | Kuwait                             | KWT | 57.39 | 83.6 |
| North Africa and Middle East | Lebanon                            | LBN | 71.92 | 75   |

|                                        |                                  |     |       |      |
|----------------------------------------|----------------------------------|-----|-------|------|
| North Africa and Middle East           | Libya                            | LBY | 59.87 | 72.2 |
| North Africa and Middle East           | Morocco                          | MAR | 50.38 | 67.6 |
| North Africa and Middle East           | Oman                             | OMN | 58.65 | 83.4 |
| North Africa and Middle East           | Palestine                        | PSE | 68.46 | 72.3 |
| North Africa and Middle East           | Qatar                            | QAT | 56.80 | 85.3 |
| North Africa and Middle East           | Saudi Arabia                     | SAU | 52.22 | 86.5 |
| North Africa and Middle East           | Sudan                            | SDN | 46.64 | 51.4 |
| North Africa and Middle East           | Syrian Arab Republic             | SYR | 56.05 | 58   |
| North Africa and Middle East           | Tunisia                          | TUN | 68.57 | 74.3 |
| North Africa and Middle East           | Türkiye                          | TUR | 62.60 | 83.9 |
| North Africa and Middle East           | United Arab Emirates             | ARE | 54.02 | 90.9 |
| North Africa and Middle East           | Yemen                            | YEM | 39.17 | 45.9 |
| South Asia                             | Bangladesh                       | BGD | 47.47 | 63.5 |
| South Asia                             | Bhutan                           | BTN | 53.36 | 65.8 |
| South Asia                             | India                            | IND | 44.36 | 64.5 |
| South Asia                             | Nepal                            | NPL | 49.44 | 60.1 |
| South Asia                             | Pakistan                         | PAK | 40.61 | 54.5 |
| Southeast Asia, East Asia, and Oceania | Cambodia                         | KHM | 52.99 | 59.1 |
| Southeast Asia, East Asia, and Oceania | China                            | CHN | 76.80 | 75.5 |
| Southeast Asia, East Asia, and Oceania | Fiji                             | FJI | 41.93 | 74.5 |
| Southeast Asia, East Asia, and Oceania | Indonesia                        | IDN | 52.67 | 71   |
| Southeast Asia, East Asia, and Oceania | Kiribati                         | KIR | 22.26 | 62.2 |
| Southeast Asia, East Asia, and Oceania | Lao People's Democratic Republic | LAO | 45.16 | 60.7 |
| Southeast Asia, East Asia, and Oceania | Malaysia                         | MYS | 61.69 | 80.7 |
| Southeast Asia, East Asia, and Oceania | Maldives                         | MDV | 68.89 | 75   |
| Southeast Asia, East Asia, and Oceania | Marshall Islands                 | MHL | 27.41 | 63.9 |
| Southeast Asia, East Asia, and Oceania | Mauritius                        | MUS | 60.51 | 81.1 |
| Southeast Asia, East Asia, and Oceania | Micronesia (Federated States of) | FSM | 43.27 | 63.3 |
| Southeast Asia, East Asia, and Oceania | Myanmar                          | MMR | 49.44 | 59   |
| Southeast Asia, East Asia, and Oceania | Papua New Guinea                 | PNG | 17.68 | 55.4 |
| Southeast Asia, East Asia, and Oceania | Philippines                      | PHL | 53.74 | 71   |
| Southeast Asia, East Asia, and Oceania | Samoa                            | WSM | 54.78 | 71.6 |
| Southeast Asia, East Asia, and Oceania | Seychelles                       | SYC | 68.78 | 80   |
| Southeast Asia, East Asia, and Oceania | Solomon Islands                  | SLB | 33.78 | 56.6 |
| Southeast Asia, East Asia, and Oceania | Sri Lanka                        | LKA | 67.33 | 77.6 |
| Southeast Asia, East Asia, and Oceania | Thailand                         | THA | 70.85 | 79.5 |
| Southeast Asia, East Asia, and Oceania | Timor-Leste                      | TLS | 43.17 | 60.5 |
| Southeast Asia, East Asia, and Oceania | Tonga                            | TON | 52.92 | 74.2 |
| Southeast Asia, East Asia, and Oceania | Vanuatu                          | VUT | 29.07 | 60.3 |
| Southeast Asia, East Asia, and Oceania | Viet Nam                         | VNM | 64.10 | 69.7 |
| Sub-Saharan Africa                     | Angola                           | AGO | 40.42 | 59.5 |
| Sub-Saharan Africa                     | Benin                            | BEN | 18.40 | 53   |
| Sub-Saharan Africa                     | Botswana                         | BWA | 59.94 | 71.6 |
| Sub-Saharan Africa                     | Burkina Faso                     | BFA | 28.80 | 44.9 |
| Sub-Saharan Africa                     | Burundi                          | BDI | 34.80 | 42.8 |
| Sub-Saharan Africa                     | Cabo Verde                       | CPV | 58.45 | 67.3 |
| Sub-Saharan Africa                     | Cameroon                         | CMR | 52.58 | 57.7 |
| Sub-Saharan Africa                     | Central African Republic         | CAF | 20.30 | 40.5 |
| Sub-Saharan Africa                     | Chad                             | TCD | 23.92 | 39.8 |
| Sub-Saharan Africa                     | Comoros                          | COM | 44.89 | 55.7 |
| Sub-Saharan Africa                     | Congo                            | COG | 47.75 | 57.8 |
| Sub-Saharan Africa                     | Côte d'Ivoire                    | CIV | 43.73 | 54.2 |



|                    |                                  |     |       |      |
|--------------------|----------------------------------|-----|-------|------|
| Sub-Saharan Africa | Democratic Republic of the Congo | COD | 37.25 | 48   |
| Sub-Saharan Africa | Djibouti                         | DJI | 33.70 | 50.6 |
| Sub-Saharan Africa | Equatorial Guinea                | GNQ | 38.38 | 60.1 |
| Sub-Saharan Africa | Eritrea                          | ERI | 34.75 | 49.3 |
| Sub-Saharan Africa | Ethiopia                         | ETH | 31.39 | 48.9 |
| Sub-Saharan Africa | Gabon                            | GAB | 55.16 | 70.6 |
| Sub-Saharan Africa | Gambia                           | GMB | 38.82 | 49.5 |
| Sub-Saharan Africa | Ghana                            | GHA | 57.08 | 62   |
| Sub-Saharan Africa | Guinea                           | GIN | 28.05 | 46.2 |
| Sub-Saharan Africa | Guinea-Bissau                    | GNB | 32.31 | 48.2 |
| Sub-Saharan Africa | Kenya                            | KEN | 56.22 | 57.7 |
| Sub-Saharan Africa | Lesotho                          | LSO | 36.44 | 52.2 |
| Sub-Saharan Africa | Liberia                          | LBR | 44.27 | 48.3 |
| Sub-Saharan Africa | Madagascar                       | MDG | 35.86 | 50.7 |
| Sub-Saharan Africa | Malawi                           | MWI | 46.12 | 51   |
| Sub-Saharan Africa | Mali                             | MLI | 25.95 | 43   |
| Sub-Saharan Africa | Mauritania                       | MRT | 33.11 | 55.6 |
| Sub-Saharan Africa | Mozambique                       | MOZ | 30.37 | 45.1 |
| Sub-Saharan Africa | Namibia                          | NAM | 57.95 | 63.6 |
| Sub-Saharan Africa | Niger                            | NER | 14.62 | 39.9 |
| Sub-Saharan Africa | Nigeria                          | NGA | 48.98 | 53.1 |
| Sub-Saharan Africa | Rwanda                           | RWA | 46.77 | 52.8 |
| Sub-Saharan Africa | Sao Tome and Principe            | STP | 51.89 | 61.7 |
| Sub-Saharan Africa | Senegal                          | SEN | 40.67 | 51.2 |
| Sub-Saharan Africa | Sierra Leone                     | SLE | 37.89 | 47   |
| Sub-Saharan Africa | South Africa                     | ZAF | 56.56 | 72.6 |
| Sub-Saharan Africa | South Sudan                      | SSD | 17.14 | 39.5 |
| Sub-Saharan Africa | Togo                             | TGO | 44.89 | 52.8 |
| Sub-Saharan Africa | Uganda                           | UGA | 25.67 | 52.2 |
| Sub-Saharan Africa | United Republic of Tanzania      | TZA | 52.77 | 53.8 |
| Sub-Saharan Africa | Zambia                           | ZMB | 40.45 | 57.2 |
| Sub-Saharan Africa | Zimbabwe                         | ZWE | 46.68 | 60.2 |
